# Supplementary material for: Single molecule analysis of CENP-A chromatin by high-speed atomic force microscopy
Source: eLife journal article supplement (doi:10.7554/elife.86709), 2023-09-01
Supplement: fig1-figsupp1-data2 [file Source_Data_2.xlsx]

## Sheet: Sheet1
Source data 2: Nucleosome statistics for Suppl Figure 1
Particle	ImagePart	Diameter	Height	Volume	Perim	Circ	Sample
1	25	19.2838	3.607	1053.47	132.877	0.831	CpA
2	28	19.2838	3.623	1058.14	147.178	0.678	CpA
3	23	18.8862	3.576	1001.79	126.462	0.88	CpA
4	4	17.2039	3.569	829.643	112.161	0.929	CpA
5	15	19.4796	2.382	709.891	152.408	0.645	CpA
6	14	18.0646	2.526	647.414	142.643	0.633	CpA
7	9	16.9819	2.865	648.916	134.552	0.629	CpA
8	27	18.6842	2.076	569.2	136.922	0.735	CpA
9	29	16.529	2.921	626.779	119.066	0.761	CpA
10	8	16.529	2.772	594.807	125.972	0.68	CpA
11	1	16.9819	2.797	633.514	124.296	0.737	CpA
12	10	17.2039	2.354	547.206	137.413	0.619	CpA
13	20	17.4231	2.21	526.905	130.017	0.709	CpA
14	24	16.9819	2.469	559.223	130.017	0.673	CpA
15	6	15.3383	2.501	462.121	108.116	0.795	CpA
16	7	14.5772	2.985	498.176	108.116	0.718	CpA
17	11	15.8253	1.872	368.214	110.976	0.803	CpA
18	17	15.3383	2.05	378.788	119.066	0.655	CpA
19	16	14.8352	2.372	410.009	109.301	0.727	CpA
20	19	15.3383	2.065	381.559	112.161	0.738	CpA
21	3	14.8352	2.439	421.59	109.301	0.727	CpA
22	5	14.5772	2.348	391.865	108.116	0.718	CpA
23	2	14.5772	2.081	347.304	109.301	0.702	CpA
24	21	14.3145	2.042	328.624	101.211	0.79	CpA
25	26	14.8352	1.915	331.014	108.116	0.743	CpA
26	41	12.221	3.188	373.959	86.967	0.78	CpA
27	35	12.5156	2.644	325.275	94.305	0.695	CpA
28	55	11.8682	2.329	257.649	89.729	0.691	CpA
29	305	12.6122	2.4612	307.481	83.927	0.892	CpA
30	190	12.4182	1.838	222.613	79.824	0.955	CpA
31	173	12.32	1.813	216.126	83.257	0.864	CpA
32	30	11.8169	2.178	238.867	92.017	0.651	CpA
33	117	12.32	2.464	293.732	80.495	0.925	CpA
34	249	12.5156	2.3898	294.003	85.545	0.845	CpA
35	250	12.5156	2.2008	270.751	86.967	0.818	CpA
36	172	12.0711	2.4486	280.22	80.968	0.877	CpA
37	32	10.5694	3.046	267.25	74.774	0.789	CpA
38	51	10.8528	2.6	240.517	77.062	0.783	CpA
39	49	11.2376	2.383	236.351	75.248	0.88	CpA
40	141	11.9192	2.485	277.276	89.255	0.704	CpA
41	69	10.9641	2.412	227.726	74.97	0.844	CpA
42	103	12.221	2.1798	255.695	96.397	0.635	CpA
43	278	11.8682	1.783	197.247	79.35	0.883	CpA
44	132	11.8169	2.464	270.233	87.441	0.721	CpA
45	25	11.7654	1.789	194.498	80.495	0.843	CpA
46	297	12.0711	2.2666	259.392	88.781	0.73	CpA
47	251	12.1213	2.2232	256.545	84.875	0.805	CpA
48	272	12.0711	2.2232	254.425	84.401	0.808	CpA
49	44	10.9641	2.222	209.787	83.731	0.677	CpA
50	247	11.7137	2.3464	252.86	74.97	0.964	CpA
51	307	11.8682	2.324	257.095	88.781	0.705	CpA
52	102	11.5572	2.4864	260.834	75.918	0.915	CpA
53	246	11.7654	2.268	246.574	84.401	0.767	CpA
54	145	11.5045	2.4612	255.843	75.444	0.918	CpA
55	26	11.9701	2.1714	244.355	85.545	0.773	CpA
56	273	11.5045	1.786	185.656	77.062	0.88	CpA
57	11	11.6096	2.4038	254.461	76.114	0.918	CpA
58	300	11.6618	2.3156	247.333	74.97	0.955	CpA
59	27	11.8682	2.219	245.48	80.968	0.848	CpA
60	42	11.8169	2.2596	247.816	78.68	0.891	CpA
61	123	11.8682	2.128	235.413	88.307	0.713	CpA
62	23	11.7137	2.2904	246.826	82.586	0.794	CpA
63	44	11.3451	2.4892	251.632	74.3	0.92	CpA
64	42	10.6836	2.221	199.103	78.68	0.728	CpA
65	178	11.5045	2.3856	247.984	75.444	0.918	CpA
66	127	11.3451	2.4626	248.943	78.206	0.831	CpA
67	115	11.3451	2.3716	239.744	82.113	0.754	CpA
68	72	11.2914	2.4374	244.071	73.826	0.924	CpA
69	108	11.0743	1.836	176.845	69.92	0.99	CpA
70	118	11.4516	2.3562	242.681	74.3	0.938	CpA
71	66	11.3451	2.3996	242.574	85.349	0.698	CpA
72	100	11.1834	2.4458	240.247	74.97	0.878	CpA
73	77	11.3451	2.3814	240.735	75.444	0.893	CpA
74	64	10.6836	2.232	200.089	82.586	0.661	CpA
75	281	11.3985	2.4262	247.577	74.3	0.929	CpA
76	73	11.2914	2.3408	234.398	79.824	0.79	CpA
77	30	11.1834	2.366	232.409	75.444	0.867	CpA
78	158	11.0193	1.78	169.754	72.208	0.919	CpA
79	213	11.2376	2.2722	225.362	77.732	0.825	CpA
80	59	11.1834	2.3198	227.87	73.156	0.923	CpA
81	67	13.1403	2.649	359.237	64.396	0.913	CpA
82	296	11.2914	2.2498	225.285	75.444	0.884	CpA
83	202	11.2914	2.24	224.304	78.206	0.823	CpA
84	253	11.1834	2.3716	232.959	74.97	0.878	CpA
85	196	11.0193	2.3114	220.432	74.774	0.857	CpA
86	197	11.0743	2.3086	222.367	75.444	0.851	CpA
87	283	11.129	2.2582	219.666	71.538	0.955	CpA
88	64	11.0743	2.3128	222.771	72.682	0.917	CpA
89	138	11.0193	2.3534	224.438	83.731	0.684	CpA
90	257	11.2376	2.1966	217.864	77.732	0.825	CpA
91	37	10.6836	1.903	170.595	80.495	0.695	CpA
92	294	10.9086	2.3576	220.341	70.394	0.948	CpA
93	150	11.1834	2.1938	215.494	86.019	0.667	CpA
94	20	11.0193	2.2442	214.024	72.682	0.907	CpA
95	228	10.9086	2.2386	209.22	73.826	0.862	CpA
96	306	11.129	2.0622	200.6	83.257	0.705	CpA
97	293	11.129	2.1224	206.456	83.257	0.705	CpA
98	245	10.9641	2.1826	206.067	74.3	0.86	CpA
99	78	10.7403	2.3072	209.03	70.394	0.919	CpA
100	295	10.9086	2.1294	199.014	75.444	0.825	CpA
101	65	10.6836	2.275	203.944	71.538	0.88	CpA
102	116	10.7967	2.2624	207.129	68.776	0.973	CpA
103	265	10.9641	2.1728	205.142	75.918	0.823	CpA
104	286	10.9086	2.1266	198.752	73.156	0.878	CpA
105	14	13.7101	1.901	280.642	79.35	0.655	CpA
106	131	10.6267	2.3436	207.858	77.062	0.751	CpA
107	225	11.0193	2.114	201.607	83.731	0.684	CpA
108	149	10.6836	2.2064	197.794	67.632	0.985	CpA
109	37	10.7403	2.2386	202.815	74.3	0.825	CpA
110	156	10.5118	2.401	208.369	68.776	0.922	CpA
111	68	10.5694	2.3352	204.886	72.682	0.835	CpA
112	88	10.8528	2.1574	199.574	83.731	0.663	CpA
113	139	10.6267	2.268	201.153	73.156	0.833	CpA
114	224	10.6836	2.1686	194.405	71.064	0.892	CpA
115	280	10.7967	2.0062	183.673	73.826	0.844	CpA
116	58	14.0253	2.2204	343.041	67.158	0.957	CpA
117	303	10.5118	2.1854	189.658	68.302	0.935	CpA
118	166	13.9472	2.3492	358.907	66.014	0.979	CpA
119	279	14.0253	2.254	348.233	67.632	0.943	CpA
120	201	13.7101	2.4794	366.031	67.632	0.901	CpA
121	285	10.6267	2.1826	193.579	77.062	0.751	CpA
122	9	13.6302	1.989	290.219	81.442	0.614	CpA
123	125	14.0253	2.2848	352.991	78.206	0.705	CpA
124	134	10.5118	2.1994	190.873	75.918	0.757	CpA
125	170	10.5694	2.1154	185.601	71.064	0.873	CpA
126	205	13.7896	2.3002	343.525	69.92	0.853	CpA
127	76	10.6267	2.0566	182.403	85.349	0.612	CpA
128	186	13.8686	2.198	332.034	77.062	0.71	CpA
129	242	13.7896	2.2386	334.325	67.158	0.925	CpA
130	210	13.7101	2.2778	336.269	68.776	0.872	CpA
131	22	13.3875	1.923	270.686	70.868	0.783	CpA
132	4	13.8686	2.1812	329.496	68.776	0.892	CpA
133	288	13.7101	2.2862	337.509	69.25	0.86	CpA
134	25	12.2805	2.261	267.807	59.819	0.924	CpA
135	252	10.5118	2.0118	174.593	77.732	0.722	CpA
136	188	13.5498	2.2526	324.815	66.014	0.924	CpA
137	32	13.7896	2.1574	322.198	69.92	0.853	CpA
138	184	13.8686	2.1252	321.037	68.776	0.892	CpA
139	182	13.7101	2.1742	320.975	75.444	0.724	CpA
140	209	13.2232	2.4276	333.38	64.87	0.911	CpA
141	50	13.6302	2.2372	326.434	67.632	0.891	CpA
142	24	13.7101	2.1868	322.835	72.682	0.78	CpA
143	263	13.8686	2.1014	317.441	81.639	0.633	CpA
144	83	13.6302	2.1966	320.51	66.014	0.935	CpA
145	22	13.3875	2.4136	339.744	63.725	0.968	CpA
146	9	13.5498	2.2414	323.2	67.158	0.893	CpA
147	168	13.2232	2.3142	317.807	63.725	0.944	CpA
148	299	13.3875	2.1952	309.001	64.87	0.934	CpA
149	61	13.3056	2.1812	303.286	64.199	0.942	CpA
150	28	13.1403	2.226	301.873	64.396	0.913	CpA
151	106	13.0568	2.2806	305.363	63.252	0.935	CpA
152	207	13.0568	2.2624	302.926	68.106	0.806	CpA
153	287	13.2232	2.0888	286.853	68.106	0.827	CpA
154	289	13.3056	2.0412	283.82	72.682	0.735	CpA
155	208	13.3056	2.0076	279.148	73.826	0.712	CpA
156	38	12.1912	2.028	236.728	68.106	0.703	CpA
157	160	12.9729	2.1364	282.388	60.963	0.993	CpA
158	82	12.5446	2.3562	291.217	60.489	0.943	CpA
159	34	12.8884	2.149	280.364	64.87	0.866	CpA
160	3	12.9729	2.1112	279.057	77.536	0.614	CpA
161	174	12.8033	2.205	283.885	69.92	0.735	CpA
162	1	12.8033	2.2666	291.815	70.394	0.726	CpA
163	113	12.8033	2.2316	287.309	67.632	0.786	CpA
164	282	12.8033	2.1308	274.332	62.107	0.932	CpA
165	54	12.4572	2.3562	287.173	60.015	0.945	CpA
166	84	12.7177	2.1448	272.453	63.252	0.887	CpA
167	211	12.6314	2.1252	266.315	63.252	0.875	CpA
168	62	12.7177	2.0748	263.561	70.394	0.716	CpA
169	237	12.2805	2.2204	262.998	58.871	0.954	CpA
170	177	12.6314	2.1014	263.332	60.963	0.942	CpA
171	227	12.6314	2.0776	260.35	63.252	0.875	CpA
172	154	12.5446	2.0062	247.958	66.014	0.792	CpA
173	256	12.4572	2.0636	251.511	62.581	0.869	CpA
174	93	12.1012	2.2764	261.816	57.727	0.964	CpA
175	181	12.1012	2.2708	261.172	57.057	0.987	CpA
176	215	12.2805	2.1154	250.561	63.725	0.815	CpA
177	50	11.3558	2.082	210.865	60.963	0.761	CpA
178	152	12.1912	2.1336	249.054	60.489	0.891	CpA
179	19	11.9192	1.81	201.959	62.581	0.796	CpA
180	53	12.2805	2.142	253.712	61.437	0.876	CpA
181	111	12.2805	2.0916	247.742	60.489	0.904	CpA
182	302	12.2805	2.093	247.908	58.871	0.954	CpA
183	71	12.1012	2.1112	242.816	60.015	0.892	CpA
184	277	12.1912	2.0678	241.373	59.345	0.926	CpA
185	46	11.2591	2.098	208.884	53.821	0.96	CpA
186	216	12.0106	2.1798	246.964	58.201	0.934	CpA
187	99	12.0106	2.1602	244.743	57.727	0.949	CpA
188	94	12.1012	2.1686	249.418	57.057	0.987	CpA
189	260	12.0106	2.1882	247.915	64.87	0.752	CpA
190	244	12.0106	2.219	251.405	62.107	0.82	CpA
191	75	11.7344	2.3142	250.273	57.727	0.906	CpA
192	180	11.9192	2.2022	245.721	58.871	0.899	CpA
193	66	11.4516	1.855	191.059	62.581	0.734	CpA
194	254	12.0106	2.0986	237.764	62.107	0.82	CpA
195	97	12.0106	2.0846	236.178	59.345	0.898	CpA
196	223	11.7344	2.1938	237.252	56.583	0.943	CpA
197	258	11.8272	2.198	241.48	60.963	0.825	CpA
198	15	11.9192	2.1182	236.348	62.107	0.808	CpA
199	41	11.8272	2.1714	238.557	60.963	0.825	CpA
200	18	12.0106	2.0776	235.385	66.961	0.706	CpA
201	159	11.8272	2.2022	241.941	59.345	0.871	CpA
202	233	11.8272	2.135	234.558	56.583	0.958	CpA
203	122	11.9192	2.0412	227.757	62.107	0.808	CpA
204	291	12.1012	1.9824	228.002	71.064	0.636	CpA
205	105	11.7344	2.191	236.949	59.819	0.844	CpA
206	40	10.864	2.009	186.229	51.533	0.975	CpA
207	101	11.6409	2.135	227.228	67.632	0.65	CpA
208	26	11.2591	1.791	178.318	66.961	0.62	CpA
209	199	11.5467	2.2274	233.239	57.057	0.898	CpA
210	36	11.6409	2.1336	227.079	56.583	0.928	CpA
211	36	10.864	2.157	199.948	53.821	0.894	CpA
212	191	11.6409	2.1602	229.91	61.437	0.787	CpA
213	270	11.6409	2.0972	223.205	55.913	0.951	CpA
214	16	11.6409	2.0762	220.97	59.345	0.844	CpA
215	112	11.7344	2.0048	216.813	68.776	0.638	CpA
216	109	11.6409	2.1238	226.036	60.489	0.812	CpA
217	29	11.5467	2.0832	218.139	58.201	0.863	CpA
218	157	11.5467	2.1252	222.537	62.581	0.747	CpA
219	79	11.5467	2.1056	220.485	57.057	0.898	CpA
220	56	10.7629	1.975	179.687	53.821	0.877	CpA
221	12	11.6409	1.9992	212.775	58.871	0.858	CpA
222	16	10.7629	1.819	165.494	58.675	0.738	CpA
223	51	11.3558	2.2036	223.181	55.913	0.905	CpA
224	214	11.2591	2.2246	221.489	54.295	0.943	CpA
225	240	11.3558	2.1588	218.644	54.295	0.959	CpA
226	2	10.864	1.977	183.263	58.201	0.764	CpA
227	136	11.4516	1.995	205.479	58.201	0.849	CpA
228	87	11.2591	2.1126	210.338	57.727	0.834	CpA
229	167	11.2591	2.1056	209.641	59.345	0.789	CpA
230	276	11.4516	2.0062	206.632	53.821	0.993	CpA
231	35	11.3558	1.9964	202.196	66.014	0.649	CpA
232	10	10.4539	1.92	164.795	54.295	0.813	CpA
233	10	11.1617	2.0664	202.191	56.583	0.853	CpA
234	124	11.1617	2.121	207.534	54.295	0.927	CpA
235	164	11.1617	2.1854	213.835	61.437	0.724	CpA
236	298	11.3558	1.918	194.255	57.057	0.869	CpA
237	20	9.91738	2.21	170.717	47.627	0.951	CpA
238	143	10.9641	2.1714	205.01	56.583	0.823	CpA
239	137	11.1617	1.9852	194.246	66.014	0.627	CpA
240	30	10.027	2.075	163.851	51.059	0.846	CpA
241	56	10.9641	2.0958	197.872	54.965	0.873	CpA
242	135	11.1617	1.9236	188.219	55.439	0.889	CpA
243	128	10.6609	2.3996	214.197	54.295	0.846	CpA
244	89	10.864	2.0538	190.382	52.203	0.95	CpA
245	195	10.7629	2.1574	196.281	53.347	0.893	CpA
246	194	10.864	2.0566	190.641	51.533	0.975	CpA
247	1	10.3488	1.915	161.078	62.107	0.609	CpA
248	292	11.0633	1.8998	182.628	60.489	0.734	CpA
249	29	10.3488	1.791	150.648	55.439	0.764	CpA
250	8	10.864	1.9922	184.672	52.677	0.933	CpA
251	68	10.5579	2.3744	207.873	60.963	0.658	CpA
252	162	10.864	1.9852	184.023	52.677	0.933	CpA
253	140	10.9641	1.9166	180.953	62.107	0.684	CpA
254	4	10.2426	1.788	147.326	60.963	0.619	CpA
255	81	10.7629	2.0188	183.672	54.295	0.862	CpA
256	2	10.027	1.953	154.217	48.771	0.927	CpA
257	259	10.7629	1.9894	180.997	51.533	0.957	CpA
258	55	10.5579	2.0958	183.482	52.677	0.881	CpA
259	18	10.027	1.874	147.979	54.965	0.73	CpA
260	52	10.5579	2.1238	185.933	49.245	1	CpA
261	31	10.6609	2.0132	179.706	57.057	0.766	CpA
262	1	10.1354	1.922	155.069	60.963	0.606	CpA
263	284	10.5579	2.0888	182.869	51.059	0.938	CpA
264	57	10.6609	2.0062	179.081	54.295	0.846	CpA
265	92	10.5579	2.0734	181.521	51.059	0.938	CpA
266	274	10.4539	2.0328	174.477	50.585	0.937	CpA
267	255	10.5579	2.0384	178.457	54.295	0.829	CpA
268	161	10.3488	2.121	178.406	49.915	0.943	CpA
269	15	9.91738	2.4444	188.824	50.389	0.85	CpA
270	187	10.3488	2.023	170.163	52.203	0.862	CpA
271	39	10.3488	2.0566	172.989	54.295	0.797	CpA
272	63	10.4539	1.995	171.232	55.439	0.78	CpA
273	230	10.2426	2.0692	170.496	52.677	0.829	CpA
274	70	10.027	2.2162	175	58.871	0.636	CpA
275	104	10.3488	2.0258	170.398	53.821	0.811	CpA
276	236	10.2426	2.0356	167.728	53.821	0.794	CpA
277	17	10.2426	2.0818	171.535	57.057	0.707	CpA
278	171	10.3488	1.967	165.452	55.913	0.751	CpA
279	206	10.2426	2.0566	169.458	51.533	0.866	CpA
280	121	10.2426	2.0678	170.381	53.151	0.815	CpA
281	271	10.2426	2.0482	168.766	52.677	0.829	CpA
282	110	10.2426	1.9754	162.768	53.151	0.815	CpA
283	69	10.2426	1.9908	164.036	49.915	0.924	CpA
284	90	10.027	2.1462	169.473	49.245	0.909	CpA
285	86	10.027	2.1714	171.463	50.389	0.868	CpA
286	43	10.1354	2.016	162.653	53.151	0.798	CpA
287	40	10.1354	1.9964	161.071	50.389	0.887	CpA
288	13	10.027	2.0972	165.604	51.059	0.846	CpA
289	193	10.027	1.981	156.428	48.771	0.927	CpA
290	179	10.027	2.0048	158.307	50.389	0.868	CpA
291	6	10.027	2.0426	161.292	52.677	0.795	CpA
