# Supplementary material for: Single molecule analysis of CENP-A chromatin by high-speed atomic force microscopy
Source: eLife journal article supplement (doi:10.7554/elife.86709), 2023-09-01
Supplement: fig2-data2 [file Source_Data_4.xlsx]

## Sheet: Sheet1
Source data 4 - Diffusion constants, MSD slope, average MSD, average step size, maximum R-step, and R-step range for Figures 2-4 and Supplemental Figures 5-7, 10, 11, 13-15
particle	sample	Diffusion_constant	MSD_slope	average_step	Rmax	Rrange
APS2X__MSD_2	APS2x	0.165016	1.32013	1.7366	4.98264	7.29137
APS2X__MSD_3	APS2x	0.110585	0.884683	2.21099	5.07817	8.94689
APS2X__MSD_7	APS2x	0.0984867	0.787894	1.93104	5.13148	8.95714
APS2X__MSD_10	APS2x	0.0700321	0.560257	1.39242	3.58394	5.487
APS2X__MSD_12	APS2x	0.456494	3.65195	3.06233	13.1372	31.3775
APS2X__MSD_13	APS2x	0.200302	1.60242	1.00149	14.8518	19.1909
APS2X__MSD_14	APS2x	0.511744	4.09395	1.48868	12.1685	13.9509
APS2X__MSD_15	APS2x	0.186189	1.48951	2.92789	9.83587	11.8482
APS2X__MSD_20	APS2x	0.134914	1.07931	1.35005	5.43726	7.66041
APS2X__MSD_21	APS2x	0.0988715	0.790972	1.9189	5.53413	6.42686
APS2X__MSD_24	APS2x	0.24358	1.94864	2.62844	8.23236	9.11519
APS2X__MSD_28	APS2x	0.153161	1.22529	2.2047	7.65262	11.49
APS2X__MSD_30	APS2x	0.948773	7.59018	3.52359	10.3136	11.2895
APS2X__MSD_32	APS2x	0.333217	2.66574	1.20833	4.8416	13.4733
APS2X__MSD_39	APS2x	0.403861	3.23089	2.56347	8.54651	11.3207
APS2X__MSD_41	APS2x	0.554063	4.4325	4.27027	16.6851	18.9325
APS2X__MSD_43	APS2x	0.888021	7.10417	3.67917	9.94342	19.4986
APS2X__MSD_45	APS2x	2.47231	19.7785	9.29092	18.7112	38.8243
APS2X__MSD_46	APS2x	0.20511	1.64088	1.5306	5.53855	10.4909
APS2X__MSD_47	APS2x	0.192999	1.54399	2.80094	7.50635	9.32707
APS2X__MSD_49	APS2x	0.215847	1.72678	2.46316	10.4226	13.0337
APS2X__MSD_53	APS2x	0.103905	0.831243	1.18774	4.60355	15.0341
APS2X__MSD_55	APS2x	2.74769	21.9815	6.20161	15.5768	36.6773
APS2X__MSD_57	APS2x	1.4139	11.3112	4.27901	11.5321	22.9412
APS2X__MSD_63	APS2x	0.340691	2.72553	1.32238	9.41138	10.8011
APS2X__MSD_64	APS2x	1.5505	12.404	6.49632	22.9497	35.5503
APS2X__MSD_65	APS2x	0.434806	3.47845	3.34464	9.05071	11.2711
APS2X__MSD_67	APS2x	0.118757	0.950054	3.47242	16.9313	25.5164
APS2X__MSD_70	APS2x	0.488195	3.90556	4.96175	23.9749	42.4941
APS2X__MSD_71	APS2x	0.339279	2.71423	1.34001	10.6251	11.8011
APS2X__MSD_72	APS2x	0.538356	4.30685	1.98926	7.62796	23.9815
APS2X__MSD_73	APS2x	7.14476	57.1581	9.66967	22.3225	61.0182
APS2X__MSD_77	APS2x	0.286811	2.29449	6.00942	12.9378	18.1629
APS2X__MSD_78	APS2x	0.225814	1.80651	1.92762	6.61321	6.98159
APS2X__MSD_79	APS2x	0.240015	1.92012	3.90548	9.01576	16.1403
APS2X__MSD_81	APS2x	1.57504	12.6003	3.81437	9.28248	19.911
APS2X__MSD_82	APS2x	0.243935	1.95148	3.00379	6.87343	10.1967
APS2X__MSD_83	APS2x	0.0836397	0.669118	3.28724	6.1701	9.39067
APS2X__MSD_85	APS2x	1.77279	14.1823	3.05395	7.48021	17.9699
APS2X__MSD_90	APS2x	0.145948	1.16758	2.75117	5.14346	9.27692
APS2X__MSD_91	APS2x	0.463496	3.70797	4.86676	6.72855	10.7558
APS2X__MSD_93	APS2x	1.36451	10.9161	5.01614	14.9431	23.4875
APS2X__MSD_97	APS2x	1.89065	15.1252	6.17446	13.3142	35.3033
APS2X__MSD_101	APS2x	5.86444	46.9155	7.63718	22.0244	53.4169
APS2X__MSD_104	APS2x	0.358134	2.86507	2.67428	6.73365	12.0627
APS2X__MSD_106	APS2x	4.92068	39.3654	9.95674	18.7967	38.4239
APS2X__MSD_107	APS2x	0.948843	7.59074	2.79439	8.95984	25.3978
APS2X__MSD_110	APS2x	0.0659584	0.527667	1.57605	12.3722	22.7415
APS2X__MSD_114	APS2x	2.03841	16.3073	6.96807	19.4581	34.9237
APS2X__MSD_119	APS2x	3.19226	25.5381	9.64831	16.9023	42.2312
APS2X__MSD_120	APS2x	0.981164	7.84931	3.53816	10.1939	19.1698
APS2X__MSD_122	APS2x	8.13457	65.0766	6.16048	18.2445	27.4146
APS2X__MSD_123	APS2x	0.0877235	0.701788	2.35461	8.33226	14.8312
APS2X__MSD_125	APS2x	0.0793252	0.634602	1.12608	2.06111	3.56269
APS2X__MSD_130	APS2x	3.47276	27.7821	6.58388	13.4963	23.6601
APS2X__MSD_133	APS2x	0.285545	2.28436	2.49753	5.7211	9.69491
APS2X__MSD_134	APS2x	0.122082	0.976659	3.23963	5.10952	11.4132
APS2X__MSD_138	APS2x	1.93798	15.5038	4.6342	8.8598	15.0048
APS2X__MSD_139	APS2x	0.507027	4.05622	1.44378	8.69135	11.5987
APS2X__MSD_144	APS2x	0.502789	4.02231	8.57229	19.24	38.2691
APS2X__MSD_159	APS2x	0.117077	0.936619	2.00118	7.68991	10.0195
APS2X__MSD_206	APS2x	1.22224	9.77795	4.56697	17.1687	35.2912
APS2X__MSD_211	APS2x	0.0713286	0.570629	1.8962	6.0975	7.37583
APS2X__MSD_228	APS2x	0.0629176	0.503341	1.02234	3.19852	3.61462
APS2X__MSD_229	APS2x	0.156935	1.25548	4.15235	16.8891	27.0837
APS2X__MSD_231	APS2x	0.220175	1.7614	3.7116	7.65222	12.5108
APS2X__MSD_233	APS2x	0.991535	7.93228	3.67024	15.2396	30.6625
APS2X__MSD_234	APS2x	0.408895	3.27116	2.1699	5.55658	8.06656
APS2X__MSD_235	APS2x	3.4216	27.3728	6.99906	16.1393	32.1401
APS2X__MSD_241	APS2x	0.20716	1.65728	1.13389	5.53678	8.03566
APS2X__MSD_243	APS2x	0.238253	1.90602	1.22709	4.28412	18.4829
APS2X__MSD_245	APS2x	1.9741	15.7928	4.6959	9.72696	49.2473
APS2X__MSD_248	APS2x	0.418218	3.34574	4.59937	16.434	24.6667
APS2X__MSD_255	APS2x	0.238584	1.90867	2.02534	4.72057	9.34032
APS2X__MSD_256	APS2x	0.0988363	0.79069	1.46257	2.55328	4.64922
APS2X__MSD_259	APS2x	0.113035	0.904283	1.60386	2.92437	7.72031
APS2X__MSD_260	APS2x	2.74867	21.9894	6.03545	16.1804	44.9207
APS2X__MSD_264	APS2x	0.320765	2.56612	2.64137	6.08175	10.0016
APS2X__MSD_266	APS2x	0.0703175	0.56254	6.07283	14.3348	19.1549
APS2X__MSD_267	APS2x	0.330541	2.64433	3.97085	18.5971	54.2535
APS2X__MSD_268	APS2x	0.0751846	0.601477	1.87328	5.62998	8.14148
APS2X__MSD_270	APS2x	1.14576	9.16607	2.36182	15.4859	16.6951
APS2X__MSD_271	APS2x	1.43067	11.4454	8.1571	21.1774	30.6064
APS2X__MSD_272	APS2x	0.271674	2.17339	2.36565	5.33072	8.49994
APS2X__MSD_273	APS2x	0.224972	1.79978	2.38822	8.11963	10.3222
APS2X__MSD_277	APS2x	0.130214	1.04171	1.30297	10.4624	14.8434
APS2X__MSD_280	APS2x	5.4647	43.7176	6.03197	16.6942	44.294
APS2X__MSD_281	APS2x	0.613769	4.91015	2.5754	17.7978	36.9735
APS2X__MSD_283	APS2x	1.96304	15.7043	8.7758	13.6601	37.5437
APS2X__MSD_286	APS2x	0.177338	1.4187	2.38414	4.39748	8.62588
APS2X__MSD_288	APS2x	0.38586	3.08688	3.44729	12.2649	21.5953
APS2X__MSD_289	APS2x	2.34386	18.7509	5.51273	8.45165	33.5299
APS2X__MSD_290	APS2x	0.251934	2.01547	1.43754	12.5866	18.9473
APS2X__MSD_293	APS2x	2.41905	19.3524	4.47618	8.63673	16.2714
APS2X__MSD_308	APS2x	0.10477	0.83816	4.82046	10.0244	13.4666
APS2X__MSD_310	APS2x	0.0798733	0.638986	2.05679	7.71335	9.19498
APS2X__MSD_312	APS2x	0.74314	5.94512	5.07857	8.37801	29.2468
APS2X__MSD_313	APS2x	2.07381	16.5905	4.01647	17.2583	32.5396
APS2X__MSD_315	APS2x	4.52519	36.2015	5.74731	22.0038	53.7925
APS2X__MSD_317	APS2x	1.10119	8.80954	4.01835	11.9881	17.7124
APS2X__MSD_324	APS2x	0.257041	2.05633	2.3117	7.92283	11.4422
APS2X__MSD_327	APS2x	0.524569	4.19655	1.13558	12.344	15.9091
APS2X__MSD_328	APS2x	5.46249	43.6999	6.37147	17.2686	28.1959
APS2X__MSD_329	APS2x	5.19091	41.5273	7.48021	23.8857	31.8584
APS2X__MSD_331	APS2x	8.66987	69.359	6.94127	23.693	45.7648
APS2X__MSD_332	APS2x	4.06781	32.5425	5.02672	23.5909	40.3524
APS2X__MSD_334	APS2x	0.0929035	0.743228	1.65586	4.59216	8.47869
APS2X__MSD_335	APS2x	1.81109	14.4887	5.19703	9.17673	26.1942
APS2X__MSD_338	APS2x	3.78555	30.2844	4.51805	23.0651	49.9865
APS2X__MSD_343	APS2x	5.1017	40.8136	6.32881	21.9651	45.6851
APS2X__MSD_345	APS2x	0.14284	1.14272	1.55924	11.4697	11.976
APS2X__MSD_347	APS2x	1.54421	12.3537	3.83946	8.86508	31.0142
APS2X__MSD_348	APS2x	1.44748	11.5798	3.80237	11.5528	15.4402
APS2X__MSD_351	APS2x	4.1948	33.5584	4.16215	18.9582	35.6471
APS2X__MSD_355	APS2x	0.991178	7.92942	2.26666	11.5167	13.6486
APS2X__MSD_403	APS2x	0.109094	0.872754	1.8321	5.02714	9.74118
APS2X__MSD_416	APS2x	0.364648	2.91718	4.70405	9.49162	15.6576
APS2X__MSD_417	APS2x	0.609563	4.8765	5.11819	14.4585	28.888
APS2X__MSD_418	APS2x	0.391222	3.12978	3.46137	8.34971	20.3563
APS2X__MSD_419	APS2x	0.258964	2.07171	13.7098	22.3813	22.3813
CpA_1xCpC__MSD_0	CpA_1xCpC	0.0658161	0.526529	1.7002	6.43283	13.8236
CpA_1xCpC__MSD_4	CpA_1xCpC	0.34016	2.72128	5.30657	9.16984	10.4717
CpA_1xCpC__MSD_7	CpA_1xCpC	0.189995	1.51996	2.36734	7.04087	12.037
CpA_1xCpC__MSD_10	CpA_1xCpC	0.246989	1.97591	4.36122	12.75	20.0701
CpA_1xCpC__MSD_14	CpA_1xCpC	0.300275	2.4022	4.57407	9.99973	16.9213
CpA_1xCpC__MSD_15	CpA_1xCpC	0.21477	1.71816	3.90845	8.59801	14.1214
CpA_1xCpC__MSD_22	CpA_1xCpC	0.0783236	0.626589	1.26724	3.11526	5.76971
CpA_1xCpC__MSD_24	CpA_1xCpC	0.127834	1.02267	2.90537	5.13431	8.39155
CpA_1xCpC__MSD_42	CpA_1xCpC	0.0936674	0.749339	1.191	3.98298	15.9282
CpA_1xCpC__MSD_52	CpA_1xCpC	0.137684	1.10147	3.85857	8.28176	16.1964
CpA_1xCpC__MSD_62	CpA_1xCpC	0.871263	6.9701	1.69326	10.5474	22.1549
CpA_1xCpC__MSD_65	CpA_1xCpC	0.065666	0.525328	1.15444	5.51367	7.01275
CpA_1xCpC__MSD_66	CpA_1xCpC	0.0945172	0.756138	1.23316	3.14662	7.02268
CpA_1xCpC__MSD_69	CpA_1xCpC	0.671789	5.37431	4.55803	7.53831	9.65382
CpA_1xCpC__MSD_72	CpA_1xCpC	0.961318	7.69054	5.50815	7.46708	13.7459
CpA_1xCpC__MSD_73	CpA_1xCpC	1.05727	8.45813	3.98441	9.70459	10.0312
CpA_1xCpC__MSD_75	CpA_1xCpC	0.811499	6.49199	4.80847	6.39344	11.6701
CpA_1xCpC__MSD_76	CpA_1xCpC	0.122727	0.981814	2.13255	6.77817	6.84162
CpA_1xCpC__MSD_77	CpA_1xCpC	0.55752	4.46016	4.11536	7.52196	9.02221
CpA_1xCpC__MSD_80	CpA_1xCpC	0.546341	4.37073	2.16736	4.7704	4.82392
CpA_1xCpC__MSD_82	CpA_1xCpC	0.106769	0.854152	3.31224	9.18615	15.9848
CpA_1xCpC__MSD_84	CpA_1xCpC	1.79271	14.3417	5.53735	16.0057	27.4402
CpA_1xCpC__MSD_85	CpA_1xCpC	0.411647	3.29318	4.09211	7.12509	7.9147
CpA_1xCpC__MSD_86	CpA_1xCpC	0.700354	5.60283	3.81432	8.29265	20.279
CpA_1xCpC__MSD_88	CpA_1xCpC	2.41703	19.3362	5.2779	12.0768	13.541
CpA_1xCpC__MSD_90	CpA_1xCpC	0.0626351	0.501081	1.94797	4.50308	5.26278
CpA_1xCpC__MSD_94	CpA_1xCpC	0.14096	1.12768	1.7166	2.00856	3.15316
CpA_1xCpC__MSD_95	CpA_1xCpC	0.330356	2.64285	3.65738	7.46166	11.529
CpA_1xCpC__MSD_97	CpA_1xCpC	0.644463	5.1557	6.19727	13.3733	16.9977
CpA_1xCpC__MSD_98	CpA_1xCpC	0.760707	6.08566	4.91979	8.99518	11.5788
CpA_1xCpC__MSD_99	CpA_1xCpC	0.193451	1.54761	3.2137	4.85482	5.47583
CpA_1xCpC__MSD_100	CpA_1xCpC	0.076704	0.613632	1.75632	7.5871	11.4009
CpA_1xCpC__MSD_104	CpA_1xCpC	0.274031	2.19225	4.63428	12.401	16.008
CpA_1xCpC__MSD_106	CpA_1xCpC	0.0884004	0.707203	1.43319	2.74048	3.36748
CpA_1xCpC__MSD_107	CpA_1xCpC	0.234496	1.87597	1.79696	3.05314	4.19872
CpA_1xCpC__MSD_109	CpA_1xCpC	0.189105	1.51284	1.47335	2.44144	3.11442
CpA_1xCpC__MSD_111	CpA_1xCpC	0.6061	4.8488	2.05102	4.11822	4.65603
CpA_1xCpC__MSD_113	CpA_1xCpC	0.14236	1.13888	2.05131	2.76303	3.63846
CpA_1xCpC__MSD_118	CpA_1xCpC	2.07531	16.6025	5.35378	19.5912	51.165
CpA_1xCpC__MSD_123	CpA_1xCpC	0.0982134	0.785707	3.97405	10.2837	10.9141
CpA_1xCpC__MSD_124	CpA_1xCpC	1.03837	8.30693	2.25365	19.6027	28.1705
CpA_1xCpC__MSD_127	CpA_1xCpC	0.0631888	0.50551	4.28261	10.3123	17.805
CpA_1xCpC__MSD_128	CpA_1xCpC	0.091191	0.729528	3.42003	12.5661	17.0761
CpA_1xCpC__MSD_131	CpA_1xCpC	0.166681	1.33345	1.40541	3.81281	9.28968
CpA_1xCpC__MSD_132	CpA_1xCpC	0.521161	4.16929	2.21047	8.7225	18.6347
CpA_1xCpC__MSD_133	CpA_1xCpC	0.089436	0.715488	1.65545	4.43171	7.73602
CpA_1xCpC__MSD_135	CpA_1xCpC	1.20442	9.63539	3.46562	13.3272	35.0822
CpA_1xCpC__MSD_136	CpA_1xCpC	0.086221	0.689768	1.26573	3.02771	4.02636
CpA_1xCpC__MSD_139	CpA_1xCpC	0.187555	1.50044	1.59536	2.99763	5.5934
CpA_1xCpC__MSD_141	CpA_1xCpC	0.0956859	0.765487	1.51861	5.00295	13.3274
CpA_1xCpC__MSD_149	CpA_1xCpC	0.265925	2.1274	2.24716	6.47473	13.3699
CpA_1xCpC__MSD_150	CpA_1xCpC	0.307079	2.45663	2.27538	5.64744	13.4499
CpA_1xCpC__MSD_151	CpA_1xCpC	0.13594	1.08752	2.46309	9.78675	16.8664
CpA_1xCpC__MSD_154	CpA_1xCpC	0.203942	1.63154	2.52758	9.17194	22.9455
CpA_1xCpC__MSD_155	CpA_1xCpC	0.350992	2.80794	4.08646	10.4607	14.7781
CpA_1xCpC__MSD_157	CpA_1xCpC	0.226183	1.80946	2.45685	7.19469	20.3823
CpA_1xCpC__MSD_159	CpA_1xCpC	0.0767122	0.613698	1.60607	6.13487	10.9409
CpA_1xCpC__MSD_160	CpA_1xCpC	0.159859	1.27887	1.95016	4.43386	7.37924
CpA_1xCpC__MSD_161	CpA_1xCpC	0.063695	0.50956	1.59182	6.84001	9.93771
CpA_1xCpC__MSD_163	CpA_1xCpC	0.151619	1.21295	2.27853	7.31405	18.9035
CpA_1xCpC__MSD_164	CpA_1xCpC	0.14667	1.17336	2.47558	8.96078	14.4416
CpA_1xCpC__MSD_169	CpA_1xCpC	0.0663875	0.5311	2.70707	7.4023	12.9068
CpA_1xCpC__MSD_170	CpA_1xCpC	0.685119	5.48095	3.19398	12.3836	16.1005
CpA_1xCpC__MSD_172	CpA_1xCpC	0.124095	0.992763	1.21239	2.39676	5.17771
CpA_1xCpC__MSD_173	CpA_1xCpC	0.818949	6.55159	3.02022	9.80033	19.4945
CpA_1xCpC__MSD_175	CpA_1xCpC	0.875675	7.0054	3.39838	12.2146	16.095
CpA_1xCpC__MSD_176	CpA_1xCpC	0.404996	3.23997	2.79805	7.86451	15.8575
CpA_1xCpC__MSD_179	CpA_1xCpC	0.088409	0.707272	1.40979	3.50767	5.8884
CpA_1xCpC__MSD_180	CpA_1xCpC	0.441834	3.53467	2.50168	5.32751	7.81528
CpA_1xCpC__MSD_184	CpA_1xCpC	0.301134	2.40907	2.62367	7.79775	15.72
CpA_1xCpC__MSD_187	CpA_1xCpC	0.0869702	0.695762	1.49578	3.11071	10.3965
CpA_1xCpC__MSD_194	CpA_1xCpC	0.0828389	0.662711	1.82052	9.47016	13.9384
CpA_1xCpC__MSD_198	CpA_1xCpC	0.489596	3.91677	3.32295	12.411	14.8295
CpA_1xCpC__MSD_199	CpA_1xCpC	0.694847	5.55878	2.14666	5.80606	14.402
CpA_1xCpC__MSD_200	CpA_1xCpC	0.468354	3.74683	3.4976	9.92549	18.441
CpA_1xCpC__MSD_207	CpA_1xCpC	0.189007	1.51206	4.89923	12.486	23.2058
CpA_1xCpC__MSD_208	CpA_1xCpC	0.246372	1.97098	1.9588	5.44935	11.923
CpA_1xCpC__MSD_211	CpA_1xCpC	0.264274	2.11419	2.43312	9.26344	11.5943
CpA_1xCpC__MSD_215	CpA_1xCpC	0.410669	3.28535	1.81071	13.4065	17.0601
CpA_1xCpC__MSD_217	CpA_1xCpC	0.246909	1.97527	2.45499	4.5167	12.3207
CpA_1xCpC__MSD_222	CpA_1xCpC	0.0777176	0.621741	4.27366	9.27172	13.7228
CpA_1xCpC__MSD_226	CpA_1xCpC	1.09272	8.74175	3.05131	8.26325	19.8362
CpA_1xCpC__MSD_229	CpA_1xCpC	0.1023	0.8184	1.29251	2.16463	4.57815
CpA_1xCpC__MSD_233	CpA_1xCpC	0.091556	0.732448	1.48858	2.76255	5.83412
CpA_1xCpC__MSD_235	CpA_1xCpC	2.41341	19.3073	5.46342	11.3983	15.7444
CpA_1xCpC__MSD_237	CpA_1xCpC	0.0947324	0.757859	1.93551	9.69611	12.5646
CpA_1xCpC__MSD_238	CpA_1xCpC	0.160306	1.28245	2.09253	5.93474	7.47921
CpA_1xCpC__MSD_241	CpA_1xCpC	0.566194	4.52955	3.42994	10.0604	12.2896
CpA_1xCpC__MSD_242	CpA_1xCpC	0.918481	7.34785	4.10849	10.9184	14.0863
CpA_1xCpC__MSD_243	CpA_1xCpC	0.468407	3.74726	3.75075	10.8953	13.6129
CpA_1xCpC__MSD_247	CpA_1xCpC	0.348669	2.78935	7.70029	16.0779	21.9916
CpA_1xCpC__MSD_248	CpA_1xCpC	0.0653681	0.522945	1.28181	3.07771	7.35476
CpA_1xCpC__MSD_251	CpA_1xCpC	0.0754125	0.6033	2.77939	7.04956	13.2638
CpA_1xCpC__MSD_254	CpA_1xCpC	0.123437	0.987498	3.0396	9.34214	17.8807
CpA_1xCpC__MSD_259	CpA_1xCpC	0.21933	1.75464	2.18917	6.9225	15.9298
CpA_1xCpC__MSD_260	CpA_1xCpC	0.203937	1.6315	1.82136	4.98981	18.097
CpA_1xCpC__MSD_262	CpA_1xCpC	0.216244	1.72995	3.24117	18.0196	32.8944
CpA_1xCpC__MSD_264	CpA_1xCpC	0.127895	1.02316	2.46261	7.55379	15.3371
CpA_1xCpC__MSD_269	CpA_1xCpC	0.0969895	0.775916	1.68417	7.26814	14.5514
CpA_1xCpC__MSD_271	CpA_1xCpC	0.120637	0.965093	1.93277	6.24869	12.3851
CpA_1xCpC__MSD_275	CpA_1xCpC	0.132291	1.05833	1.75996	6.65334	12.4785
CpA_1xCpC__MSD_279	CpA_1xCpC	0.083584	0.668672	1.41525	4.90913	10.7423
CpA_1xCpC__MSD_280	CpA_1xCpC	0.117758	0.942066	1.92281	6.38815	10.441
CpA_1xCpC__MSD_282	CpA_1xCpC	0.333364	2.66691	2.4371	6.2819	17.3266
CpA_1xCpC__MSD_284	CpA_1xCpC	0.341558	2.73246	3.19975	10.0271	24.1072
CpA_1xCpC__MSD_285	CpA_1xCpC	0.19345	1.5476	3.33764	9.66948	17.4711
CpA_1xCpC__MSD_289	CpA_1xCpC	0.156968	1.25574	2.2035	5.95207	7.79938
CpA_1xCpC__MSD_291	CpA_1xCpC	0.0821232	0.656986	1.67826	3.77742	6.74046
CpA_1xCpC__MSD_294	CpA_1xCpC	0.0773415	0.618732	1.59832	3.0958	6.2267
CpA_1xCpC__MSD_295	CpA_1xCpC	0.631363	5.0509	2.89801	6.69157	14.9422
CpA_1xCpC__MSD_296	CpA_1xCpC	0.133598	1.06878	1.70719	5.09409	9.84878
CpA_1xCpC__MSD_297	CpA_1xCpC	0.120425	0.963398	2.18979	4.77955	8.90928
CpA_1xCpC__MSD_300	CpA_1xCpC	0.0848426	0.678741	1.48892	3.60958	5.82699
CpA_1xCpC__MSD_302	CpA_1xCpC	2.52021	20.1617	5.49509	13.9254	20.8162
CpA_1xCpC__MSD_309	CpA_1xCpC	0.504262	4.0341	2.27991	6.43451	14.0071
CpA_1xCpC__MSD_314	CpA_1xCpC	0.23311	1.86488	3.52235	7.14414	8.77877
CpA_1xCpC__MSD_315	CpA_1xCpC	0.0678635	0.542908	2.03519	3.34928	5.40707
CpA_1xCpC__MSD_316	CpA_1xCpC	0.187256	1.49805	2.22218	5.44936	7.24339
CpA_1xCpC__MSD_318	CpA_1xCpC	0.22742	1.81936	2.25475	10.2661	17.1927
CpA_1xCpC__MSD_319	CpA_1xCpC	0.946951	7.57561	4.42832	12.2768	23.5086
CpA_1xCpC__MSD_321	CpA_1xCpC	0.0872846	0.698277	1.2552	4.42275	8.52624
CpA_1xCpC__MSD_323	CpA_1xCpC	0.145741	1.16593	1.65967	5.60032	14.4962
CpA_1xCpC__MSD_324	CpA_1xCpC	0.435227	3.48182	2.37438	6.46713	10.0199
CpA_1xCpC__MSD_325	CpA_1xCpC	1.07407	8.5926	3.4582	10.7312	21.2571
CpA_1xCpC__MSD_327	CpA_1xCpC	0.145	1.16	2.64039	10.8391	14.6003
CpA_1xCpC__MSD_332	CpA_1xCpC	0.301776	2.41421	2.32506	7.73177	12.3486
CpA_1xCpC__MSD_336	CpA_1xCpC	0.379284	3.03427	3.38913	9.83284	17.8215
CpA_1xCpC__MSD_338	CpA_1xCpC	0.18999	1.51992	2.61891	6.47759	10.0861
CpA_1xCpC__MSD_341	CpA_1xCpC	0.276933	2.21546	2.2718	4.67072	8.10617
CpA_1xCpC__MSD_343	CpA_1xCpC	0.19162	1.53296	2.11969	7.26255	22.2918
CpA_1xCpC__MSD_344	CpA_1xCpC	0.155079	1.24063	1.78536	6.62383	9.6867
CpA_1xCpC__MSD_347	CpA_1xCpC	0.135269	1.08215	2.05486	7.42397	8.72354
CpA_1xCpC__MSD_349	CpA_1xCpC	0.153152	1.22522	2.31545	7.14443	10.6108
CpA_1xCpC__MSD_351	CpA_1xCpC	1.51636	12.1309	3.40804	9.00453	18.701
CpA_1xCpC__MSD_353	CpA_1xCpC	0.0716024	0.572819	1.525	4.02808	6.70047
CpA_1xCpC__MSD_354	CpA_1xCpC	0.112289	0.898309	2.50188	8.44771	11.5125
CpA_1xCpC__MSD_356	CpA_1xCpC	1.63498	13.0798	7.74727	22.5322	47.073
CpA_1xCpC__MSD_359	CpA_1xCpC	0.0694822	0.555858	1.48357	4.01373	5.40431
CpA_1xCpC__MSD_363	CpA_1xCpC	0.0770466	0.616373	1.66371	4.10718	7.23672
CpA_1xCpC__MSD_364	CpA_1xCpC	0.137859	1.10287	2.09876	5.37889	7.92368
CpA_1xCpC__MSD_366	CpA_1xCpC	0.143614	1.14891	2.87141	13.5483	16.0492
CpA_1xCpC__MSD_374	CpA_1xCpC	0.453584	3.62867	2.50648	7.0234	9.04106
CpA_1xCpC__MSD_376	CpA_1xCpC	0.123486	0.987891	2.51996	5.40974	10.7408
CpA_1xCpC__MSD_377	CpA_1xCpC	0.12752	1.02016	3.28068	10.1166	11.8797
CpA_1xCpC__MSD_378	CpA_1xCpC	0.605581	4.84465	2.48339	8.03614	20.4571
CpA_1xCpC__MSD_385	CpA_1xCpC	5.55239	44.4191	7.33318	19.4134	47.9707
CpA_1xCpC__MSD_386	CpA_1xCpC	0.267864	2.14291	1.65853	6.74049	14.6861
CpA_1xCpC__MSD_388	CpA_1xCpC	0.414552	3.31642	5.52443	23.1966	34.425
CpA_1xCpC__MSD_389	CpA_1xCpC	0.338144	2.70515	3.33564	6.81149	15.845
CpA_1xCpC__MSD_391	CpA_1xCpC	0.364588	2.9167	1.71433	17.7997	21.0993
CpA_1xCpC__MSD_393	CpA_1xCpC	0.199953	1.59962	3.02328	8.81702	17.8759
CpA_1xCpC__MSD_394	CpA_1xCpC	0.110903	0.887226	2.99067	8.34228	14.1559
CpA_1xCpC__MSD_398	CpA_1xCpC	0.215051	1.72041	2.03917	6.2106	9.24246
CpA_1xCpC__MSD_399	CpA_1xCpC	0.130609	1.04487	2.42604	6.3949	9.16185
CpA_1xCpC__MSD_400	CpA_1xCpC	0.084387	0.675096	1.42907	2.5609	6.04911
CpA_1xCpC__MSD_402	CpA_1xCpC	0.166901	1.33521	2.2706	10.0556	17.5868
CpA_1xCpC__MSD_404	CpA_1xCpC	0.234674	1.87739	3.30681	7.46613	11.8711
CpA_1xCpC__MSD_405	CpA_1xCpC	1.17212	9.37694	2.36988	14.4397	16.8134
CpA_1xCpC__MSD_406	CpA_1xCpC	0.291038	2.3283	3.1806	8.00893	10.2316
CpA_1xCpC__MSD_407	CpA_1xCpC	0.487602	3.90082	4.19701	8.29052	16.1648
CpA_1xCpC__MSD_409	CpA_1xCpC	0.129615	1.03692	1.32706	3.67205	4.93271
CpA_1xCpC__MSD_415	CpA_1xCpC	0.352552	2.82042	3.35374	10.4245	13.6152
CpA_1xCpC__MSD_416	CpA_1xCpC	1.12144	8.97151	6.04478	16.1137	18.355
CpA_1xCpC__MSD_420	CpA_1xCpC	0.221172	1.76938	3.04294	7.17293	10.1066
CpA_1xCpC__MSD_422	CpA_1xCpC	0.121954	0.975632	2.24391	3.84902	5.91309
CpA_1xCpC__MSD_427	CpA_1xCpC	2.416	19.328	5.36285	11.3691	28.5916
CpA_1xCpC__MSD_428	CpA_1xCpC	0.0757239	0.605791	1.31978	2.45595	3.62239
CpA_1xCpC__MSD_430	CpA_1xCpC	0.155915	1.24732	2.25938	4.61466	6.64128
CpA_1xCpC__MSD_432	CpA_1xCpC	0.205143	1.64114	2.38983	6.3202	12.97
CpA_1xCpC__MSD_433	CpA_1xCpC	0.110932	0.887458	2.58071	9.98149	13.3966
CpA_1xCpC__MSD_436	CpA_1xCpC	0.128876	1.03101	2.00658	6.57321	10.2908
CpA_1xCpC__MSD_437	CpA_1xCpC	0.0956354	0.765083	1.73172	4.32519	10.2889
CpA_1xCpC__MSD_440	CpA_1xCpC	0.124224	0.993792	1.94729	6.16402	11.682
CpA_1xCpC__MSD_441	CpA_1xCpC	0.249906	1.99925	4.31967	10.3298	17.3995
CpA_1xCpC__MSD_443	CpA_1xCpC	0.115799	0.926394	1.60113	5.23895	19.4592
CpA_1xCpC__MSD_446	CpA_1xCpC	0.248128	1.98502	2.10503	8.16627	11.3266
CpA_1xCpC__MSD_447	CpA_1xCpC	0.37885	3.0308	2.95967	10.0284	16.6786
CpA_1xCpC__MSD_448	CpA_1xCpC	0.0651121	0.520897	1.83053	6.08824	13.2514
CpA_1xCpC__MSD_450	CpA_1xCpC	0.103114	0.824913	3.10712	12.4856	14.9567
CpA_1xCpC__MSD_452	CpA_1xCpC	0.245053	1.96042	2.02593	6.153	19.3024
CpA_1xCpC__MSD_454	CpA_1xCpC	0.368016	2.94413	2.64933	8.99762	15.1363
CpA_1xCpC__MSD_457	CpA_1xCpC	0.383217	3.06574	4.51503	13.4348	16.8097
CpA_1xCpC__MSD_459	CpA_1xCpC	0.0839743	0.671794	2.94667	9.34778	12.5832
CpA_1xCpC__MSD_464	CpA_1xCpC	0.0886648	0.709318	1.85695	4.25215	9.23232
CpA_1xCpC__MSD_467	CpA_1xCpC	0.320311	2.56249	2.22008	6.30934	13.0865
CpA_1xCpC__MSD_468	CpA_1xCpC	0.329125	2.633	3.49918	8.35863	16.05
CpA_1xCpC__MSD_471	CpA_1xCpC	0.708483	5.66786	3.46137	10.181	17.1633
CpA_1xCpC__MSD_472	CpA_1xCpC	0.46463	3.71704	3.21035	12.3274	15.4576
CpA_1xCpC__MSD_473	CpA_1xCpC	0.0968201	0.774561	1.94404	8.22933	11.59
CpA_1xCpC__MSD_474	CpA_1xCpC	0.538811	4.31049	2.84826	13.7178	16.7108
CpA_1xCpC__MSD_477	CpA_1xCpC	0.669625	5.357	2.58423	9.27552	35.4428
CpA_1xCpC__MSD_478	CpA_1xCpC	0.425932	3.40746	2.89381	7.01837	13.3948
CpA_1xCpC__MSD_480	CpA_1xCpC	0.219724	1.75779	1.65421	4.39064	14.5407
CpA_1xCpC__MSD_481	CpA_1xCpC	0.148787	1.1903	1.83898	7.84963	9.87967
CpA_1xCpC__MSD_482	CpA_1xCpC	0.0661414	0.529131	2.34034	5.00798	8.4287
CpA_1xCpC__MSD_484	CpA_1xCpC	0.734827	5.87862	2.96033	8.87729	12.1356
CpA_1xCpC__MSD_485	CpA_1xCpC	0.161552	1.29242	3.04904	6.10229	11.9514
CpA_1xCpC__MSD_486	CpA_1xCpC	0.861835	6.89468	3.3366	12.7122	17.8605
CpA_1xCpC__MSD_490	CpA_1xCpC	0.14503	1.16024	3.50166	9.61306	17.7625
CpA_1xCpC__MSD_492	CpA_1xCpC	0.123564	0.988512	1.83939	3.693	6.92803
CpA_1xCpC__MSD_493	CpA_1xCpC	0.0831031	0.664825	1.78182	3.5446	5.54474
CpA_1xCpC__MSD_494	CpA_1xCpC	1.92874	15.4299	5.09599	10.5307	16.6952
CpA_1xCpC__MSD_495	CpA_1xCpC	0.501543	4.01234	2.56184	8.27661	12.6146
CpA_1xCpC__MSD_496	CpA_1xCpC	0.080989	0.647912	1.63615	2.83509	4.74845
CpA_1xCpC__MSD_499	CpA_1xCpC	0.263951	2.11161	3.03207	5.77864	8.80624
CpA_1xCpC__MSD_500	CpA_1xCpC	0.0727039	0.581631	2.00091	3.63275	5.99875
CpA_1xCpC__MSD_501	CpA_1xCpC	0.0791445	0.633156	1.68905	6.93559	19.6721
CpA_1xCpC__MSD_505	CpA_1xCpC	0.139033	1.11226	2.68061	8.76752	13.1191
CpA_1xCpC__MSD_506	CpA_1xCpC	0.265449	2.12359	3.29719	8.01034	15.8049
CpA_1xCpC__MSD_507	CpA_1xCpC	0.577573	4.62058	3.28336	7.57991	15.0526
CpA_1xCpC__MSD_508	CpA_1xCpC	1.37715	11.0172	4.99983	11.7874	17.0316
CpA_1xCpC__MSD_510	CpA_1xCpC	0.138905	1.11124	2.36598	7.62632	14.9406
CpA_1xCpC__MSD_513	CpA_1xCpC	1.24691	9.97527	3.33546	17.094	31.7011
CpA_1xCpC__MSD_514	CpA_1xCpC	0.870134	6.96107	3.74412	12.1876	12.5928
CpA_1xCpC__MSD_515	CpA_1xCpC	1.12687	9.01492	2.96764	7.04592	20.432
CpA_1xCpC__MSD_516	CpA_1xCpC	1.08665	8.69318	3.5498	7.25597	14.0673
CpA_1xCpC__MSD_519	CpA_1xCpC	0.149845	1.19876	1.59531	6.95855	8.70495
CpA_1xCpC__MSD_522	CpA_1xCpC	0.0758768	0.607014	2.06013	5.51982	11.3801
CpA_1xCpC__MSD_523	CpA_1xCpC	0.0765299	0.612239	1.41597	4.95233	11.3274
CpA_1xCpC__MSD_524	CpA_1xCpC	0.156862	1.2549	3.01023	6.15641	9.63642
CpA_1xCpC__MSD_526	CpA_1xCpC	1.15705	9.25641	3.65531	13.1474	28.9825
CpA_1xCpC__MSD_527	CpA_1xCpC	0.334697	2.67758	4.14968	13.2666	22.8655
CpA_1xCpC__MSD_528	CpA_1xCpC	0.0738766	0.591013	1.60681	5.18419	8.78998
CpA_1xCpC__MSD_529	CpA_1xCpC	0.114575	0.916598	2.09707	8.11221	12.6936
CpA_1xCpC__MSD_531	CpA_1xCpC	0.0892898	0.714318	1.37807	2.98036	4.40665
CpA_1xCpC__MSD_533	CpA_1xCpC	0.174885	1.39908	3.23746	5.17491	7.12334
CpA_1xCpC__MSD_534	CpA_1xCpC	1.16384	9.31073	6.33463	16.2805	31.9802
CpA_1xCpC__MSD_535	CpA_1xCpC	0.0717761	0.574209	1.99477	6.06902	12.4003
CpA_1xCpC__MSD_536	CpA_1xCpC	0.535465	4.28372	3.62044	10.4317	11.6021
CpA_1xCpC__MSD_538	CpA_1xCpC	2.36401	18.9121	3.70373	11.3077	19.1499
CpA_1xCpC__MSD_546	CpA_1xCpC	0.366273	2.93018	2.62797	5.02292	10.2351
CpA_1xCpC__MSD_547	CpA_1xCpC	1.5379	12.3032	3.70174	19.9926	23.407
CpA_1xCpC__MSD_548	CpA_1xCpC	1.45994	11.6795	6.38033	14.9667	19.8752
CpA_1xCpC__MSD_549	CpA_1xCpC	0.158908	1.27126	2.23325	3.01031	5.94156
CpA_1xCpC__MSD_553	CpA_1xCpC	1.48936	11.9149	2.85818	10.8478	21.745
CpA_1xCpC__MSD_557	CpA_1xCpC	0.196111	1.56889	1.96339	4.79974	12.2957
CpA_1xCpC__MSD_558	CpA_1xCpC	0.599445	4.79556	2.80724	6.81465	8.43084
CpA_1xCpC__MSD_569	CpA_1xCpC	0.0990002	0.792002	2.90471	7.37003	14.6176
CpA_1xCpC__MSD_581	CpA_1xCpC	0.154032	1.23226	2.3328	5.50154	12.7816
CpA_1xCpC__MSD_597	CpA_1xCpC	0.0763586	0.610869	1.41339	3.57679	7.77488
CpA_1xCpC__MSD_600	CpA_1xCpC	0.0823639	0.658911	1.18987	3.4007	10.6769
CpA_1xCpC__MSD_601	CpA_1xCpC	0.291878	2.33502	1.71106	9.46459	21.5142
CpA_1xCpC__MSD_611	CpA_1xCpC	0.277135	2.21708	2.29273	9.23399	21.764
CpA_1xCpC__MSD_614	CpA_1xCpC	0.198056	1.58445	3.46711	10.3001	22.5368
CpA_1xCpC__MSD_618	CpA_1xCpC	0.120397	0.963176	2.34283	8.46099	12.3334
CpA_1xCpC__MSD_620	CpA_1xCpC	0.0959877	0.767902	1.66358	4.45997	9.08347
CpA_1xCpC__MSD_621	CpA_1xCpC	0.562412	4.4993	4.20651	22.981	41.0233
CpA_1xCpC__MSD_622	CpA_1xCpC	0.103972	0.831775	2.15408	4.32755	9.84704
CpA_1xCpC__MSD_624	CpA_1xCpC	0.977167	7.81734	5.02197	22.32	43.5358
CpA_1xCpC__MSD_625	CpA_1xCpC	0.164524	1.31619	1.89956	8.21519	13.9303
CpA_1xCpC__MSD_626	CpA_1xCpC	0.0674894	0.539915	1.05789	4.16124	13.1043
CpA_1xCpC__MSD_627	CpA_1xCpC	0.414274	3.31419	3.01856	10.4827	13.9299
CpA_1xCpC__MSD_628	CpA_1xCpC	0.172923	1.38338	1.69201	7.33357	13.3438
CpA_1xCpC__MSD_629	CpA_1xCpC	0.0659223	0.527378	2.29446	5.21278	8.35279
CpA_1xCpC__MSD_631	CpA_1xCpC	0.0759119	0.607295	2.39544	4.76568	10.2471
CpA_1xCpC__MSD_632	CpA_1xCpC	0.393373	3.14698	2.41431	7.36153	25.5907
CpA_1xCpC__MSD_635	CpA_1xCpC	0.0635511	0.508409	1.50878	4.43889	8.12448
CpA_1xCpC__MSD_636	CpA_1xCpC	0.0880556	0.704445	2.1499	11.2359	12.2618
CpA_1xCpC__MSD_637	CpA_1xCpC	0.157845	1.26276	2.38814	8.16826	11.3914
CpA_1xCpC__MSD_638	CpA_1xCpC	0.173856	1.39085	2.12738	5.49449	14.8268
CpA_1xCpC__MSD_641	CpA_1xCpC	0.575285	4.60228	4.15364	8.16498	11.3537
CpA_1xCpC__MSD_644	CpA_1xCpC	0.258495	2.06796	1.67792	6.48239	9.5771
CpA_1xCpC__MSD_646	CpA_1xCpC	0.652735	5.22188	2.84281	7.14572	27.3326
CpA_1xCpC__MSD_648	CpA_1xCpC	0.0664736	0.531789	2.99212	10.4108	15.6436
CpA_1xCpC__MSD_649	CpA_1xCpC	1.02496	8.19969	4.39057	7.68235	12.4911
CpA_1xCpC__MSD_650	CpA_1xCpC	0.15465	1.2372	2.5683	7.76978	16.7842
CpA_1xCpC__MSD_651	CpA_1xCpC	0.159034	1.27227	4.84798	8.27239	14.8804
CpA_1xCpC__MSD_652	CpA_1xCpC	0.3387	2.7096	3.61077	8.3516	29.8802
CpA_1xCpC__MSD_659	CpA_1xCpC	1.2345	9.87599	5.39699	20.4042	23.3245
CpA_1xCpC__MSD_660	CpA_1xCpC	0.222172	1.77738	2.08689	8.72599	17.9046
CpA_1xCpC__MSD_662	CpA_1xCpC	0.374393	2.99514	2.37831	5.34224	8.96704
CpA_1xCpC__MSD_663	CpA_1xCpC	0.171847	1.37478	4.32873	7.00645	16.1039
CpA_1xCpC__MSD_664	CpA_1xCpC	0.376752	3.01402	1.84087	6.798	19.8841
CpA_1xCpC__MSD_665	CpA_1xCpC	0.64027	5.12216	2.50264	8.02341	14.4308
CpA_1xCpC__MSD_666	CpA_1xCpC	1.39977	11.1982	4.58277	7.96449	17.1456
CpA_1xCpC__MSD_667	CpA_1xCpC	0.198156	1.58525	1.64726	8.62621	15.8095
CpA_1xCpC__MSD_672	CpA_1xCpC	0.219224	1.75379	1.72969	5.61315	10.242
CpA_1xCpC__MSD_673	CpA_1xCpC	0.127856	1.02285	1.75865	3.80214	4.65966
CpA_1xCpC__MSD_674	CpA_1xCpC	0.15645	1.2516	4.46864	15.6388	21.494
CpA_1xCpC__MSD_677	CpA_1xCpC	0.235295	1.88236	2.93099	6.09053	9.55257
CpA_1xCpC__MSD_678	CpA_1xCpC	0.70063	5.60504	5.08066	12.3001	25.2973
CpA_1xCpC__MSD_682	CpA_1xCpC	0.308296	2.46637	4.49674	7.62505	10.9234
CpA_1xCpC__MSD_686	CpA_1xCpC	0.131654	1.05323	1.2595	8.8521	14.4077
CpA_1xCpC__MSD_704	CpA_1xCpC	0.0679106	0.543285	1.42319	5.51361	10.9361
CpA_1xCpC__MSD_707	CpA_1xCpC	0.120129	0.961035	2.60831	8.1327	14.2945
CpA_1xCpC__MSD_711	CpA_1xCpC	0.135728	1.08582	1.24801	6.57102	18.129
CpA_1xCpC__MSD_720	CpA_1xCpC	0.0788695	0.630956	4.83537	10.7651	14.3505
CpA_1xCpC__MSD_726	CpA_1xCpC	0.0709995	0.567996	1.6084	4.59391	11.3184
CpA_1xCpC__MSD_733	CpA_1xCpC	0.378191	3.02553	2.29673	5.65382	17.1446
CpA_1xCpC__MSD_736	CpA_1xCpC	0.154055	1.23244	2.42543	7.6837	15.2559
CpA_1xCpC__MSD_739	CpA_1xCpC	0.0738135	0.590508	1.35801	6.62445	9.98964
CpA_1xCpC__MSD_740	CpA_1xCpC	0.137551	1.10041	1.45115	5.13923	10.338
CpA_1xCpC__MSD_741	CpA_1xCpC	0.166254	1.33003	1.91313	4.36092	10.8695
CpA_1xCpC__MSD_743	CpA_1xCpC	0.06936	0.55488	1.42471	4.23285	7.7664
CpA_1xCpC__MSD_746	CpA_1xCpC	0.14791	1.18328	2.751	10.1873	14.5974
CpA_1xCpC__MSD_747	CpA_1xCpC	0.298651	2.38921	3.34639	7.71145	15.603
CpA_1xCpC__MSD_749	CpA_1xCpC	0.369821	2.95857	3.04105	5.7803	8.81968
CpA_1xCpC__MSD_750	CpA_1xCpC	0.104531	0.83625	1.50976	3.47128	8.28355
CpA_1xCpC__MSD_752	CpA_1xCpC	0.457479	3.65983	4.69206	15.2504	43.1316
CpA_1xCpC__MSD_753	CpA_1xCpC	0.275786	2.20629	6.9432	14.0766	16.3215
CpA_1xCpC__MSD_757	CpA_1xCpC	0.0654929	0.523943	1.8962	3.49556	5.2678
CpA_1xCpC__MSD_758	CpA_1xCpC	0.102753	0.822024	1.26018	8.93661	13.2073
CpA_1xCpC__MSD_759	CpA_1xCpC	0.0794346	0.635477	2.92816	8.13412	17.0909
CpA_1xCpC__MSD_761	CpA_1xCpC	0.252744	2.02195	2.83412	7.14577	21.9641
CpA_1xCpC__MSD_763	CpA_1xCpC	0.157743	1.26194	2.54544	5.23773	8.96175
CpA_1xCpC__MSD_766	CpA_1xCpC	0.0657733	0.526186	1.5296	5.45691	11.8809
CpA_1xCpC__MSD_768	CpA_1xCpC	0.0945271	0.756217	1.57492	10.3106	13.0329
CpA_1xCpC__MSD_770	CpA_1xCpC	0.116411	0.931288	1.9402	6.0265	9.59509
CpA_1xCpC__MSD_775	CpA_1xCpC	1.76076	14.0861	3.44234	8.85745	26.7065
CpA_1xCpC__MSD_776	CpA_1xCpC	0.217097	1.73678	1.79431	4.17352	12.3089
CpA__MSD_0	CpA	0.295314	2.36251	2.74341	10.1231	25.72
CpA__MSD_1	CpA	0.74095	5.9276	3.47426	8.52903	22.7879
CpA__MSD_2	CpA	0.148228	1.18582	3.14358	11.3716	23.3852
CpA__MSD_3	CpA	3.16669	25.3335	4.15103	12.7964	34.2894
CpA__MSD_4	CpA	1.40647	11.2518	4.20216	16.7907	32.0607
CpA__MSD_5	CpA	0.997115	7.97692	2.98969	10.318	13.0044
CpA__MSD_6	CpA	0.314609	2.51687	4.4624	8.8148	13.8316
CpA__MSD_7	CpA	0.563943	4.51154	3.18229	11.4759	30.401
CpA__MSD_8	CpA	0.462416	3.69933	3.97502	11.7273	21.7395
CpA__MSD_9	CpA	2.2272	17.8176	5.58995	19.3891	33.7353
CpA__MSD_10	CpA	0.190023	1.52018	2.36936	8.43981	24.9602
CpA__MSD_12	CpA	0.476133	3.80906	3.7187	15.0588	32.931
CpA__MSD_13	CpA	0.52457	4.19656	4.04088	9.26526	34.6102
CpA__MSD_14	CpA	0.71579	5.72632	7.88488	23.3666	48.6983
CpA__MSD_15	CpA	0.435334	3.48267	3.14644	8.16715	20.5082
CpA__MSD_17	CpA	0.950079	7.60063	3.83816	8.67586	31.5227
CpA__MSD_18	CpA	0.763021	6.10417	3.90621	15.9856	25.4097
CpA__MSD_19	CpA	1.17726	9.4181	3.12114	11.6976	42.1223
CpA__MSD_20	CpA	0.608409	4.86727	4.0131	10.2868	21.6683
CpA__MSD_21	CpA	4.07735	32.6188	5.9129	14.7622	25.7208
CpA__MSD_22	CpA	0.794776	6.35821	3.26441	9.13433	26.943
CpA__MSD_23	CpA	0.0866573	0.693258	2.94218	7.82237	18.2126
CpA__MSD_24	CpA	6.28164	50.2531	7.99073	20.755	56.1664
CpA__MSD_26	CpA	0.789736	6.31789	4.19	11.4269	19.8362
CpA__MSD_28	CpA	0.116593	0.932744	6.15573	11.8917	19.2433
CpA__MSD_29	CpA	1.23345	9.86758	4.97704	14.0622	26.9482
CpA__MSD_30	CpA	10.2048	81.6385	9.73621	22.9167	59.292
CpA__MSD_32	CpA	9.21144	73.6915	8.38546	20.3215	39.8339
CpA__MSD_33	CpA	0.124935	0.999482	2.67072	9.64982	17.034
CpA__MSD_34	CpA	2.16784	17.3427	6.12858	11.6811	26.8123
CpA__MSD_35	CpA	0.334937	2.6795	3.19752	13.4366	34.9154
CpA__MSD_36	CpA	0.124976	0.99981	1.92277	5.62303	24.6069
CpA__MSD_37	CpA	0.132398	1.05918	2.57177	8.27332	17.4691
CpA__MSD_38	CpA	1.68839	13.5071	4.86778	8.88787	24.563
CpA__MSD_39	CpA	0.117513	0.940103	3.6709	11.3065	20.7529
CpA__MSD_40	CpA	2.07536	16.6029	4.58691	8.28567	18.0423
CpA__MSD_41	CpA	0.411635	3.29308	3.57183	11.1399	14.297
CpA__MSD_42	CpA	1.12909	9.03275	5.2817	14.6814	29.5368
CpA__MSD_43	CpA	0.528679	4.22943	3.60876	17.8366	25.4208
CpA__MSD_44	CpA	0.235395	1.88316	3.44916	8.27972	13.843
CpA__MSD_47	CpA	0.746809	5.97447	4.72004	10.7065	22.4806
CpA__MSD_48	CpA	0.141929	1.13543	2.65388	6.9968	19.5665
CpA__MSD_49	CpA	0.334689	2.67751	3.59126	7.19382	15.1937
CpA__MSD_50	CpA	0.0958439	0.766751	4.99398	21.0725	34.576
CpA__MSD_51	CpA	1.06162	8.49299	5.38162	10.4585	18.8633
CpA__MSD_52	CpA	6.52238	52.179	7.68564	20.3898	44.4408
CpA__MSD_53	CpA	1.36896	10.9517	5.21353	14.4714	34.9926
CpA__MSD_54	CpA	2.29421	18.3537	4.02725	17.953	34.7186
CpA__MSD_55	CpA	0.63377	5.07016	3.36078	9.44128	17.7593
CpA__MSD_57	CpA	0.67517	5.40136	7.81634	13.7681	26.307
CpA__MSD_58	CpA	0.292155	2.33724	6.46349	12.3275	25.5691
CpA__MSD_59	CpA	0.419538	3.3563	3.2323	8.25267	17.9893
CpA__MSD_60	CpA	18.8596	150.877	15.2891	21.8767	61.2595
CpA__MSD_61	CpA	3.75454	30.0363	15.8693	23.98	48.9075
CpA__MSD_62	CpA	2.90149	23.2119	6.43388	11.9036	24.2636
CpA__MSD_63	CpA	0.182592	1.46074	4.68377	12.3899	15.4814
CpA__MSD_65	CpA	2.11943	16.9554	5.26876	15.6566	37.5791
CpA__MSD_66	CpA	3.24184	25.9347	8.04256	11.327	22.2496
CpA__MSD_67	CpA	1.50299	12.0239	3.88406	7.94177	15.1691
CpA__MSD_68	CpA	6.66886	53.3509	10.5475	20.6758	32.9413
CpA__MSD_69	CpA	0.413615	3.30892	3.23408	9.2249	17.558
CpA__MSD_71	CpA	2.15612	17.249	5.62421	15.5123	34.8152
CpA__MSD_72	CpA	0.726116	5.80893	4.06668	13.9771	40.0833
CpA__MSD_73	CpA	0.0921338	0.73707	2.93968	7.99112	10.5957
CpA__MSD_74	CpA	0.196882	1.57506	3.25063	12.6385	24.6111
CpA__MSD_78	CpA	0.780411	6.24329	2.9335	8.99344	25.1618
CpA__MSD_79	CpA	0.341637	2.7331	3.12208	9.5908	23.3518
CpA__MSD_81	CpA	0.55892	4.47136	2.03623	11.1261	23.2338
CpA__MSD_82	CpA	3.04871	24.3897	6.12251	14.3647	60.2483
CpA__MSD_83	CpA	0.0747221	0.597777	1.6566	4.75614	9.24452
CpA__MSD_84	CpA	0.789173	6.31338	3.45457	10.7897	15.706
CpA__MSD_85	CpA	0.62538	5.00304	4.09922	14.2699	41.5772
CpA__MSD_86	CpA	0.212266	1.69813	4.86043	14.5422	28.6018
CpA__MSD_88	CpA	0.238524	1.90819	2.37527	6.56615	23.6865
CpA__MSD_90	CpA	0.363725	2.9098	4.50257	11.0485	16.6642
CpA__MSD_91	CpA	2.36935	18.9548	6.3611	15.6189	34.8732
CpA__MSD_92	CpA	1.21605	9.72842	5.25734	16.986	30.9537
CpA__MSD_93	CpA	8.90227	71.2182	8.84063	18.1535	55.8914
CpA__MSD_94	CpA	0.513919	4.11135	11.446	19.5747	34.4178
CpA__MSD_95	CpA	1.57654	12.6123	5.2128	18.9932	32.3294
CpA__MSD_96	CpA	1.0866	8.69283	8.71459	17.7446	32.5769
CpA__MSD_97	CpA	0.330596	2.64477	4.70463	8.33113	15.5816
CpA__MSD_99	CpA	0.491013	3.9281	3.19581	6.67586	20.2669
CpA__MSD_100	CpA	2.71913	21.753	6.42478	20.6338	54.3673
CpA__MSD_104	CpA	1.3399	10.7192	6.40092	14.4178	26.0813
CpA__MSD_105	CpA	0.893204	7.14563	7.07373	17.6466	38.6528
CpA__MSD_106	CpA	5.24009	41.9207	10.1109	23.3335	54.8231
CpA__MSD_107	CpA	0.222392	1.77914	4.71028	11.9926	16.4675
CpA__MSD_110	CpA	0.204703	1.63762	3.62149	19.0167	33.4843
CpA__MSD_111	CpA	4.6771	37.4168	8.01921	17.2527	35.3548
CpA__MSD_113	CpA	0.178039	1.42431	2.07266	5.75357	8.59579
CpA__MSD_116	CpA	0.696398	5.57118	4.36131	7.98842	13.3417
CpA__MSD_117	CpA	2.46365	19.7092	5.41162	12.0122	17.1311
CpA__MSD_119	CpA	0.743584	5.94867	10.4663	18.1081	32.0677
CpA__MSD_121	CpA	2.55231	20.4185	5.29766	11.3523	22.16
CpA__MSD_124	CpA	0.276484	2.21187	2.24697	4.6457	8.14109
CpA__MSD_125	CpA	0.977967	7.82374	4.11333	9.30777	19.004
CpA__MSD_129	CpA	0.534339	4.27471	5.84833	11.7117	16.3971
CpA__MSD_130	CpA	0.0763454	0.610763	1.43067	3.15767	4.23629
CpA__MSD_133	CpA	0.784739	6.27791	2.60342	6.12907	9.77982
CpA__MSD_134	CpA	4.15982	33.2786	6.05982	14.825	32.33
CpA__MSD_145	CpA	0.0658129	0.526503	1.32597	5.99576	8.95069
CpA__MSD_148	CpA	0.083372	0.666976	1.78839	4.84432	12.5877
CpA__MSD_152	CpA	0.160749	1.28599	2.37586	6.00262	15.5967
CpA__MSD_155	CpA	0.0734784	0.587827	1.79646	10.0808	14.5668
CpA__MSD_156	CpA	0.853284	6.82627	3.19739	11.2209	31.5613
CpA__MSD_157	CpA	0.296485	2.37188	3.72887	10.0812	28.3724
CpA__MSD_159	CpA	0.119524	0.956189	2.41788	13.5554	19.4114
CpA__MSD_161	CpA	0.0774619	0.619695	1.47054	5.36779	9.92962
CpA__MSD_162	CpA	0.254189	2.03351	2.0646	8.06862	19.7393
CpA__MSD_167	CpA	0.752906	6.02325	3.71556	9.02969	30.2719
CpA__MSD_168	CpA	3.3342	26.6736	6.82827	16.4707	28.6189
CpA__MSD_169	CpA	1.27244	10.1795	5.68834	21.1043	22.8792
CpA__MSD_170	CpA	0.42193	3.37544	3.85747	7.45405	11.8918
CpA__MSD_173	CpA	0.0980117	0.784094	1.98775	6.92152	9.51902
CpA__MSD_175	CpA	0.430296	3.44237	3.54137	7.37528	17.4752
CpA__MSD_177	CpA	0.489063	3.9125	3.05177	8.87533	19.0685
CpA__MSD_178	CpA	0.113293	0.906342	3.24687	10.9332	16.5968
CpA__MSD_179	CpA	0.0829906	0.663925	1.73806	5.56013	12.2034
CpA__MSD_181	CpA	0.53173	4.25384	3.60264	12.1399	19.7508
CpA__MSD_183	CpA	0.100056	0.80045	2.96698	6.45754	11.8556
CpA__MSD_184	CpA	0.063529	0.508232	2.57415	7.12485	14.655
CpA__MSD_185	CpA	0.152072	1.21658	2.10684	8.36766	12.6556
CpA__MSD_187	CpA	0.131856	1.05485	2.51875	8.82189	14.6109
CpA__MSD_188	CpA	0.922327	7.37862	4.42469	9.73126	14.3567
CpA__MSD_189	CpA	0.0907485	0.725988	1.61522	5.27662	9.82234
CpA__MSD_190	CpA	0.099652	0.797216	2.97997	5.2903	8.63703
CpA__MSD_192	CpA	0.807164	6.45731	4.50781	12.4504	29.0125
CpA__MSD_193	CpA	0.104899	0.839195	2.08609	5.52774	8.63153
CpA__MSD_194	CpA	1.33462	10.677	7.74515	16.3342	27.7835
CpA__MSD_195	CpA	4.1158	32.9264	9.38365	21.3042	50.2735
CpA__MSD_197	CpA	4.1705	33.364	7.43904	20.0446	47.8907
CpA__MSD_198	CpA	0.733461	5.86769	3.65069	12.4289	25.0953
CpA__MSD_200	CpA	5.46486	43.7189	8.85766	21.292	58.5517
CpA__MSD_201	CpA	0.992205	7.93764	4.04657	7.33129	15.5764
CpA__MSD_202	CpA	0.218526	1.74821	3.08997	12.863	15.8006
CpA__MSD_203	CpA	0.323919	2.59135	2.70997	5.83615	8.09643
CpA__MSD_204	CpA	1.01493	8.1194	4.1236	11.993	32.2664
CpA__MSD_205	CpA	0.780386	6.24309	2.93977	9.19121	25.4212
CpA__MSD_206	CpA	1.52884	12.2307	4.37018	11.2328	27.5048
CpA__MSD_209	CpA	1.84095	14.7276	5.63948	10.5407	25.7698
CpA__MSD_210	CpA	0.275954	2.20763	3.09736	9.67542	14.0161
CpA__MSD_212	CpA	0.206939	1.65551	1.65896	9.68696	29.5593
CpA__MSD_213	CpA	0.479034	3.83227	2.95795	7.80631	13.024
CpA__MSD_214	CpA	1.00141	8.01124	3.20276	12.4549	31.3891
CpA__MSD_215	CpA	0.626671	5.01337	4.07642	9.87675	19.7657
CpA__MSD_216	CpA	0.555145	4.44116	3.25401	8.60477	13.439
CpA__MSD_217	CpA	1.56519	12.5215	6.06468	11.7155	29.1235
CpA__MSD_218	CpA	0.200636	1.60509	2.30241	4.64747	6.7416
CpA__MSD_220	CpA	0.255358	2.04286	2.94361	8.89478	19.1887
CpA__MSD_221	CpA	0.403112	3.2249	2.93921	10.372	24.2378
CpA__MSD_222	CpA	1.57684	12.6147	4.63727	14.5963	34.6686
CpA__MSD_224	CpA	2.7374	21.8992	5.1183	11.1797	25.6355
CpA__MSD_225	CpA	0.0656922	0.525538	2.00349	8.495	11.366
CpA__MSD_226	CpA	5.75033	46.0026	7.39046	13.2065	29.6072
CpA__MSD_227	CpA	3.01364	24.1091	5.33418	15.0352	51.2207
CpA__MSD_228	CpA	5.78571	46.2857	12.5183	23.8814	56.0007
CpA__MSD_230	CpA	0.298786	2.39029	3.3173	8.38384	16.168
CpA__MSD_231	CpA	0.726094	5.80875	5.07221	12.4992	31.797
CpA__MSD_232	CpA	0.731393	5.85114	3.58561	20.8715	30.108
CpA__MSD_234	CpA	1.74739	13.9791	6.15447	12.5314	19.1607
CpA__MSD_235	CpA	1.17378	9.39027	5.41565	19.4242	33.2697
CpA__MSD_239	CpA	5.70707	45.6566	12.3554	19.8731	45.8201
CpA__MSD_242	CpA	1.81751	14.5401	8.15149	23.8961	45.6002
CpA__MSD_243	CpA	3.03709	24.2967	6.27496	15.5629	43.8312
CpA__MSD_245	CpA	1.27696	10.2157	5.07738	13.4247	25.0599
CpA__MSD_246	CpA	1.08974	8.71791	3.49116	8.73952	24.2668
CpA__MSD_247	CpA	3.11281	24.9025	9.03705	21.9143	71.6989
CpA__MSD_250	CpA	0.0860679	0.688543	2.59337	8.02266	10.5106
CpA__MSD_251	CpA	0.629775	5.0382	5.33391	11.4742	26.2458
CpA__MSD_254	CpA	0.750018	6.00014	5.74139	15.2597	15.755
CpA__MSD_255	CpA	0.246611	1.97289	3.32065	9.68223	12.9054
CpA__MSD_256	CpA	0.139932	1.11946	3.79371	8.50014	11.9381
CpA__MSD_257	CpA	1.49235	11.9388	4.4692	12.3564	28.7249
CpA__MSD_259	CpA	0.315673	2.52538	4.55905	12.6355	13.4164
CpA__MSD_260	CpA	2.73264	21.8611	5.7992	12.2909	20.124
CpA__MSD_262	CpA	2.43567	19.4854	6.59697	11.9012	23.7767
CpA__MSD_264	CpA	0.0782681	0.626145	4.92405	12.8786	13.7488
CpA__MSD_265	CpA	3.27915	26.2332	7.00823	22.5714	37.4448
CpA__MSD_267	CpA	0.614372	4.91498	4.70099	9.42416	20.3971
CpA__MSD_268	CpA	0.178308	1.42646	2.0374	5.94198	7.9643
CpA__MSD_269	CpA	0.507064	4.05651	7.93469	18.4342	30.1767
CpA__MSD_270	CpA	0.0969403	0.775522	1.57392	5.52881	7.11961
CpA__MSD_271	CpA	2.49221	19.9377	7.61379	16.1148	30.2962
CpA__MSD_272	CpA	3.05744	24.4595	7.31751	14.9225	29.921
CpA__MSD_273	CpA	1.52022	12.1618	5.46282	12.3958	20.3694
CpA__MSD_275	CpA	4.36506	34.9205	8.3218	21.166	29.5894
CpA__MSD_278	CpA	2.03829	16.3063	5.70257	11.8465	19.1854
CpA__MSD_282	CpA	0.197069	1.57655	2.63308	8.01068	12.4
CpA__MSD_284	CpA	2.82275	22.582	8.40515	18.3897	36.5566
CpA__MSD_287	CpA	0.336719	2.69375	3.21525	5.48898	12.9109
CpA__MSD_289	CpA	0.137099	1.09679	2.07882	7.66919	12.6879
CpA__MSD_294	CpA	0.164531	1.31625	1.62746	4.74346	16.989
CpA__MSD_300	CpA	0.0971044	0.776835	3.8035	11.0682	16.0932
CpA__MSD_302	CpA	0.0957895	0.766316	2.13358	6.67739	14.7521
CpA__MSD_303	CpA	0.268257	2.14606	2.48684	8.36323	17.2468
CpA__MSD_306	CpA	0.282801	2.26241	2.14679	9.44949	17.6169
CpA__MSD_308	CpA	0.341409	2.73127	2.4287	6.72372	12.4143
CpA__MSD_309	CpA	1.00251	8.02009	4.69421	14.8621	36.6352
CpA__MSD_310	CpA	0.489069	3.91255	3.26592	8.58066	15.8498
CpA__MSD_313	CpA	0.345093	2.76074	4.98732	14.0637	16.2045
CpA__MSD_315	CpA	6.90206	55.2165	7.18126	15.0902	39.2484
CpA__MSD_316	CpA	0.117295	0.938358	2.52645	7.87666	19.2021
CpA__MSD_321	CpA	0.62873	5.02984	3.66326	10.0217	12.561
CpA__MSD_322	CpA	0.632111	5.05689	3.65757	9.73232	18.1947
CpA__MSD_324	CpA	0.0826583	0.661266	1.26418	3.75092	7.81598
CpA__MSD_326	CpA	2.53084	20.2467	5.32301	19.448	78.4759
CpA__MSD_327	CpA	0.0727307	0.581846	4.74064	12.4144	25.7157
CpA__MSD_329	CpA	2.68578	21.4862	7.12849	13.0854	29.2544
CpA__MSD_330	CpA	0.112581	0.900649	1.95382	7.95606	16.5219
CpA__MSD_336	CpA	0.762674	6.10139	2.33822	5.22327	16.2707
CpA__MSD_337	CpA	1.21567	9.72533	4.4263	16.753	24.9522
CpA__MSD_340	CpA	0.176783	1.41426	3.64262	10.4911	12.4449
CpA__MSD_341	CpA	0.614375	4.915	2.25853	7.31972	12.4679
CpA__MSD_342	CpA	0.850035	6.80028	4.35019	10.4632	15.9968
CpA__MSD_344	CpA	0.21444	1.71552	3.14583	8.44018	22.0991
CpA__MSD_345	CpA	0.0900016	0.720013	5.24051	10.995	25.4522
CpA__MSD_346	CpA	0.0958076	0.766461	2.38591	5.77736	7.45452
CpA__MSD_348	CpA	1.85819	14.8655	4.9648	12.8782	53.6967
CpA__MSD_350	CpA	0.0657975	0.52638	6.74965	21.115	44.4897
CpA__MSD_352	CpA	1.70417	13.6334	5.30101	15.2331	27.3912
CpA__MSD_353	CpA	4.60417	36.8334	6.70829	18.0636	21.6057
CpA__MSD_354	CpA	0.156451	1.25161	2.69558	6.97004	15.787
CpA__MSD_356	CpA	4.8931	39.1448	8.44453	22.109	34.0623
CpA__MSD_357	CpA	2.0704	16.5632	7.278	13.5648	17.5957
CpA__MSD_358	CpA	0.537805	4.30244	3.8119	9.40095	25.2375
CpA__MSD_359	CpA	0.210875	1.687	4.39079	10.3343	11.4755
CpA__MSD_360	CpA	0.331657	2.65326	2.06657	9.93813	28.0654
CpA__MSD_362	CpA	0.404486	3.23589	4.33208	7.92219	18.606
CpA__MSD_369	CpA	0.641012	5.1281	4.80598	10.2335	18.85
CpA__MSD_371	CpA	2.48391	19.8713	4.63921	12.1347	38.4609
CpA__MSD_373	CpA	5.62134	44.9707	6.533	18.8404	48.6321
CpA__MSD_374	CpA	0.128969	1.03175	2.33307	6.3337	13.9743
CpA__MSD_375	CpA	0.130442	1.04354	1.72542	8.8521	17.0686
CpA__MSD_376	CpA	0.309383	2.47506	1.9094	11.4491	15.0738
CpA__MSD_378	CpA	0.521534	4.17227	3.91803	14.9352	19.3933
CpA__MSD_381	CpA	5.00959	40.0767	6.58002	20.0071	63.4254
CpA__MSD_382	CpA	0.403803	3.23042	4.61977	10.6693	17.9105
CpA__MSD_383	CpA	5.00774	40.0619	5.15129	19.3473	34.9089
CpA__MSD_384	CpA	0.427468	3.41974	4.68037	10.7764	17.0454
CpA__MSD_387	CpA	0.392895	3.14316	3.75103	11.8195	27.3863
CpA__MSD_388	CpA	0.177875	1.423	2.19132	6.12756	17.0724
CpA__MSD_391	CpA	5.39367	43.1494	7.14858	18.043	44.5615
CpA__MSD_395	CpA	0.400465	3.20372	3.3811	7.81871	15.0175
CpA__MSD_396	CpA	0.395304	3.16243	2.55084	7.4868	10.4694
CpA__MSD_397	CpA	0.27695	2.2156	7.68799	22.7091	42.0981
CpA__MSD_398	CpA	6.14581	49.1665	8.13483	17.3849	41.2739
CpA__MSD_400	CpA	2.9124	23.2992	6.91999	14.4681	23.785
CpA__MSD_402	CpA	8.01419	64.1135	9.0688	23.447	48.8953
CpA__MSD_403	CpA	2.05785	16.4628	7.75458	15.0146	23.8307
CpA__MSD_407	CpA	0.420722	3.36578	2.93054	9.68824	15.8184
CpA__MSD_408	CpA	0.68482	5.47856	2.65259	6.69853	13.2196
CpA__MSD_409	CpA	0.854607	6.83686	4.00705	7.65871	14.2589
CpA__MSD_411	CpA	0.608267	4.86614	4.49421	9.91829	13.2308
CpA__MSD_412	CpA	0.490353	3.92282	5.09606	11.3004	20.8085
CpA__MSD_413	CpA	2.23305	17.8644	6.45977	17.4475	25.7365
CpA__MSD_414	CpA	0.670529	5.36423	8.45724	19.4832	37.5619
CpA__MSD_415	CpA	0.189049	1.51239	3.05607	6.5791	12.3359
CpA__MSD_416	CpA	0.42641	3.41128	2.58732	5.85106	12.4282
CpA__MSD_417	CpA	1.01381	8.11052	3.75354	7.52015	15.5256
CpA__MSD_418	CpA	0.0715963	0.57277	2.29695	5.73257	8.46726
CpA__MSD_419	CpA	1.39722	11.1778	6.54089	13.9456	19.1752
CpA__MSD_420	CpA	0.932286	7.45829	5.33615	12.2888	28.1931
CpA__MSD_421	CpA	0.105555	0.844443	2.12938	5.25822	8.93588
CpA__MSD_422	CpA	2.66167	21.2934	10.0679	18.3854	30.4897
CpA__MSD_423	CpA	0.408049	3.26439	3.38474	9.7434	18.0415
CpA__MSD_424	CpA	0.0711713	0.56937	2.55842	5.71932	7.55002
CpA__MSD_425	CpA	9.35543	74.8434	8.29118	20.1237	37.0748
CpA__MSD_426	CpA	5.22991	41.8393	8.90977	21.0447	27.6952
CpA__MSD_427	CpA	0.274104	2.19283	3.84865	9.23176	9.47156
CpA__MSD_440	CpA	0.072973	0.583784	1.70712	4.63793	7.61891
CpA__MSD_444	CpA	0.132545	1.06036	1.74057	5.66176	9.31764
CpA__MSD_448	CpA	0.135115	1.08092	3.27598	11.9927	17.4762
CpA__MSD_449	CpA	0.971721	7.77377	4.77395	13.2016	42.2282
CpA__MSD_451	CpA	0.940926	7.52741	3.91552	11.0887	34.3189
CpA__MSD_452	CpA	0.283695	2.26956	2.22131	10.9524	20.1963
CpA__MSD_454	CpA	0.0810195	0.648156	1.99861	6.46689	9.76993
CpA__MSD_455	CpA	0.125177	1.00142	1.90615	5.99214	11.8782
CpA__MSD_456	CpA	0.146621	1.17297	2.88927	6.61248	15.6688
CpA__MSD_457	CpA	0.196128	1.56902	2.1476	5.38394	10.3893
CpA__MSD_458	CpA	0.333765	2.67012	2.37484	10.4454	18.3482
CpA__MSD_460	CpA	0.311585	2.49268	2.11876	15.1077	18.2738
CpA__MSD_463	CpA	0.330958	2.64766	2.68861	4.39071	11.3313
CpA__MSD_467	CpA	0.929222	7.43378	2.78996	8.72507	24.4775
CpA__MSD_469	CpA	0.551199	4.40959	4.41097	10.6785	14.8784
CpA__MSD_470	CpA	0.206645	1.65316	2.3829	7.01698	23.8806
CpA__MSD_472	CpA	0.468857	3.75086	4.73277	13.1619	27.2784
CpA__MSD_473	CpA	0.0735215	0.588172	2.16805	11.0536	13.1675
CpA__MSD_475	CpA	0.434824	3.47859	3.36226	8.82065	16.4691
CpA__MSD_476	CpA	1.06896	8.5517	5.60598	13.9887	32.8721
CpA__MSD_477	CpA	0.15243	1.21944	1.52182	4.74356	12.9936
CpA__MSD_478	CpA	0.246256	1.97005	2.89752	8.69687	11.4143
CpA__MSD_479	CpA	0.335835	2.68668	2.76465	7.98664	23.0997
CpA__MSD_482	CpA	0.413235	3.30588	2.6509	6.33972	10.6
CpA__MSD_483	CpA	0.243289	1.94631	3.873	11.967	23.3838
CpA__MSD_484	CpA	1.46873	11.7498	4.06271	15.0564	29.202
CpA__MSD_485	CpA	5.39668	43.1734	7.06251	15.8615	35.4771
CpA__MSD_488	CpA	0.731385	5.85108	4.97903	12.6584	21.5461
CpA__MSD_489	CpA	0.210609	1.68487	2.53869	10.2275	15.667
CpA__MSD_492	CpA	0.130215	1.04172	3.74886	12.2417	17.3898
CpA__MSD_493	CpA	5.86434	46.9147	7.77349	21.9075	39.9315
CpA__MSD_498	CpA	0.260151	2.08121	2.22164	10.0674	24.5064
CpA__MSD_499	CpA	0.161506	1.29205	3.04322	7.90663	18.8242
CpA__MSD_500	CpA	7.27538	58.203	7.14806	17.6203	44.7734
CpA__MSD_503	CpA	0.843319	6.74655	5.17049	9.79746	15.81
CpA__MSD_504	CpA	1.96516	15.7213	8.86325	20.1288	47.2256
CpA__MSD_505	CpA	1.07855	8.62839	4.19412	12.2156	31.2368
CpA__MSD_506	CpA	0.110774	0.886192	2.76259	8.29026	13.6528
CpA__MSD_507	CpA	0.176856	1.41485	3.23814	7.5428	15.4942
CpA__MSD_510	CpA	0.276062	2.2085	2.29197	8.08882	10.0556
CpA__MSD_512	CpA	0.603441	4.82753	2.78303	8.31411	17.4075
CpA__MSD_513	CpA	0.316667	2.53334	3.79785	8.89184	10.3555
CpA__MSD_514	CpA	0.0830254	0.664203	2.94106	7.81424	14.449
CpA__MSD_515	CpA	1.12202	8.97617	9.32578	20.8175	45.4816
CpA__MSD_516	CpA	0.526655	4.21324	9.11314	19.9899	26.1919
CpA__MSD_517	CpA	0.145439	1.16351	5.07086	10.9174	21.2342
CpA__MSD_522	CpA	0.28614	2.28912	3.01125	9.46736	18.3639
CpA__MSD_523	CpA	0.570376	4.56301	3.21929	9.48583	13.3581
CpA__MSD_525	CpA	0.177944	1.42355	3.39163	11.6175	13.1888
CpA__MSD_526	CpA	1.51444	12.1155	6.05621	8.74337	18.4192
CpA__MSD_530	CpA	0.533015	4.26412	4.53448	10.0559	27.7808
CpA__MSD_534	CpA	1.32931	10.6345	5.00813	12.7417	17.2121
CpA__MSD_537	CpA	0.544946	4.35957	1.86786	8.64243	16.292
CpA__MSD_538	CpA	0.664144	5.31315	2.32548	5.84374	20.4399
CpA__MSD_540	CpA	0.495113	3.9609	3.13744	10.639	12.4087
CpA__MSD_541	CpA	0.953189	7.62551	5.04896	15.6701	26.115
CpA__MSD_545	CpA	0.492746	3.94197	3.09839	8.99564	12.8469
CpA__MSD_547	CpA	0.227112	1.8169	4.2392	11.5425	12.4329
CpA__MSD_548	CpA	0.346074	2.76859	2.61659	5.38675	7.84476
CpA__MSD_552	CpA	0.455888	3.6471	2.89522	7.72326	9.83761
CpA__MSD_553	CpA	0.0789451	0.631561	1.43988	3.22185	6.92612
CpA__MSD_568	CpA	0.0629559	0.503647	1.25885	7.45608	10.6245
CpA__MSD_569	CpA	0.187476	1.49981	3.52939	10.5113	21.5387
CpA__MSD_571	CpA	0.166269	1.33015	3.03845	11.5394	12.701
CpA__MSD_579	CpA	0.0678295	0.542636	2.19272	6.61832	7.96821
CpA__MSD_582	CpA	0.0732235	0.585788	1.52967	4.44037	7.97714
CpA__MSD_585	CpA	0.691105	5.52884	4.3855	12.1114	30.6885
CpA__MSD_586	CpA	0.106607	0.852857	4.24473	14.8014	18.2249
CpA__MSD_588	CpA	0.158958	1.27166	2.38632	7.26716	11.9583
CpA__MSD_591	CpA	0.0655639	0.524511	1.61308	4.16004	7.33212
CpA__MSD_593	CpA	1.99044	15.9235	5.7193	13.8398	49.2671
CpA__MSD_595	CpA	0.35538	2.84304	4.3723	9.7715	14.6047
CpA__MSD_596	CpA	0.0843209	0.674567	1.79672	4.36534	9.98572
CpA__MSD_597	CpA	0.378326	3.02661	2.9672	6.57992	18.1936
CpA__MSD_599	CpA	0.66789	5.34312	5.51929	10.9098	20.813
CpA__MSD_600	CpA	0.758374	6.06699	4.37795	8.24657	15.4891
CpA__MSD_603	CpA	0.102331	0.818647	1.66191	6.19691	13.7947
CpA__MSD_605	CpA	1.66404	13.3123	3.62078	10.6025	19.5942
CpA__MSD_608	CpA	1.31819	10.5455	6.06291	13.8979	25.9617
CpA__MSD_610	CpA	0.273309	2.18647	2.79697	6.58294	15.565
CpA__MSD_612	CpA	0.425614	3.40491	2.54716	6.52235	7.2145
CpA__MSD_613	CpA	0.410797	3.28638	1.96479	3.87402	8.02702
CpA__MSD_615	CpA	0.4217	3.3736	4.36364	9.67258	16.0972
CpA__MSD_616	CpA	1.94219	15.5375	10.6904	18.4415	49.2537
CpA__MSD_617	CpA	0.796397	6.37118	4.885	14.0109	46.1691
CpA__MSD_618	CpA	1.00196	8.01568	4.13657	9.33997	20.6643
CpA__MSD_619	CpA	0.814616	6.51693	3.96683	10.8889	20.1523
CpA__MSD_621	CpA	3.02139	24.1711	9.48788	20.613	56.2903
CpA__MSD_622	CpA	2.60378	20.8302	5.02461	12.4124	22.6377
CpA__MSD_623	CpA	3.31514	26.5211	7.63783	13.6668	28.1842
CpA__MSD_624	CpA	0.122753	0.982026	2.85325	8.55918	16.1058
CpA__MSD_625	CpA	0.839377	6.71502	2.94084	11.2729	28.9671
CpA__MSD_626	CpA	0.529264	4.23411	3.00964	9.52129	34.0375
CpA__MSD_628	CpA	0.444106	3.55285	3.04895	7.93427	22.3765
CpA__MSD_629	CpA	0.786147	6.28918	6.1518	14.496	35.2884
CpA__MSD_631	CpA	1.09281	8.74246	4.42777	11.3216	43.174
CpA__MSD_632	CpA	0.499245	3.99396	3.68199	10.6054	20.6607
CpA__MSD_633	CpA	2.48155	19.8524	5.2388	20.3418	36.7861
CpA__MSD_634	CpA	1.26951	10.1561	4.542	9.51172	24.2626
CpA__MSD_637	CpA	0.606776	4.85421	2.96871	8.06558	19.6901
CpA__MSD_638	CpA	0.178834	1.43067	2.46586	5.88877	10.2583
CpA__MSD_639	CpA	0.120514	0.964113	2.72462	11.0332	17.8753
CpA__MSD_641	CpA	0.122981	0.98385	4.35174	7.9252	15.9783
CpA__MSD_642	CpA	0.474076	3.79261	2.01144	7.2752	23.6033
CpA__MSD_643	CpA	0.913796	7.31037	3.34463	13.7817	28.9389
CpA__MSD_644	CpA	0.717796	5.74237	5.96609	18.0601	21.2943
CpA__MSD_645	CpA	0.0694531	0.555625	2.45478	10.8677	16.313
CpA__MSD_646	CpA	1.61167	12.8934	7.0326	11.1658	24.2526
CpA__MSD_650	CpA	1.19067	9.52537	6.00404	9.86991	26.2361
CpA__MSD_651	CpA	0.0676139	0.540911	1.66821	3.70836	7.6854
CpA__MSD_652	CpA	0.099487	0.795896	2.52383	7.25056	9.30719
CpA__MSD_653	CpA	1.21121	9.68968	4.14742	10.9236	28.0642
CpA__MSD_654	CpA	0.802835	6.42268	4.12842	7.94907	23.6297
CpA__MSD_655	CpA	0.219129	1.75303	2.45038	10.1917	18.2078
CpA__MSD_656	CpA	0.0944606	0.755685	2.40895	4.56661	8.84605
CpA__MSD_660	CpA	0.646966	5.17573	3.67067	6.5387	22.0165
CpA__MSD_661	CpA	2.45465	19.6372	4.16845	11.7024	26.2932
CpA__MSD_663	CpA	1.25257	10.0206	4.26418	7.34695	18.7788
CpA__MSD_665	CpA	1.16884	9.35076	4.61555	10.3018	25.4217
CpA__MSD_666	CpA	0.128671	1.02937	3.12693	8.34438	14.0648
CpA__MSD_667	CpA	0.524175	4.1934	3.30736	7.16975	16.0793
CpA__MSD_669	CpA	0.118529	0.948232	2.14251	3.60631	7.14955
CpA__MSD_671	CpA	0.218202	1.74562	2.6886	7.7435	11.5853
CpA__MSD_675	CpA	0.0642873	0.514298	1.698	5.62969	8.41684
CpA__MSD_687	CpA	0.185991	1.48793	3.12501	9.22818	27.1499
CpA__MSD_691	CpA	0.3681	2.9448	2.43469	9.52988	20.5859
CpA__MSD_692	CpA	0.8106	6.4848	3.05306	12.2078	49.6452
CpA__MSD_693	CpA	0.357818	2.86254	3.87569	10.7621	13.3322
CpA__MSD_696	CpA	0.106769	0.854149	1.61959	4.62438	7.50046
CpA__MSD_700	CpA	0.0848277	0.678622	2.43604	6.80227	13.8264
CpA__MSD_702	CpA	0.100564	0.804511	2.80457	6.89744	11.4798
CpA__MSD_706	CpA	0.421574	3.37259	3.22391	11.2502	26.6866
CpA__MSD_707	CpA	0.199187	1.5935	2.57499	9.53296	16.9171
CpA__MSD_713	CpA	0.261789	2.09431	3.00214	6.61407	16.1464
CpA__MSD_714	CpA	0.124021	0.992167	2.00158	5.24799	6.60715
CpA__MSD_715	CpA	0.959878	7.67902	5.52787	11.1446	23.8293
CpA__MSD_716	CpA	1.537	12.296	5.65465	18.1153	40.5167
CpA__MSD_718	CpA	0.091633	0.733064	2.97891	7.38536	13.4469
CpA__MSD_719	CpA	0.0706195	0.564956	2.91783	8.59218	12.631
CpA__MSD_721	CpA	2.02707	16.2166	5.52278	11.8818	31.3174
CpA__MSD_722	CpA	0.0845459	0.676367	3.30246	8.81094	11.1917
CpA__MSD_724	CpA	2.69325	21.546	8.39918	17.8535	48.7027
CpA__MSD_725	CpA	0.62435	4.9948	5.20035	14.1256	26.1448
CpA__MSD_726	CpA	0.141517	1.13214	1.57703	2.99788	5.20468
CpA__MSD_727	CpA	0.114913	0.919304	3.31189	11.6641	17.9507
CpA__MSD_729	CpA	0.186544	1.49235	2.71564	9.86668	19.1246
CpA__MSD_731	CpA	0.359205	2.87364	2.35794	8.42774	17.2491
CpA__MSD_732	CpA	0.287602	2.30082	2.3547	4.59597	7.85656
CpA__MSD_733	CpA	0.69393	5.55144	4.90859	11.5485	16.0258
CpA__MSD_737	CpA	1.98896	15.9117	4.97585	12.8071	39.6917
CpA__MSD_738	CpA	0.0872565	0.698052	3.13887	8.32802	12.3027
CpA__MSD_740	CpA	0.993601	7.94881	4.34523	15.4655	31.5996
CpA__MSD_741	CpA	6.79568	54.3654	8.75918	22.6883	37.8512
CpA__MSD_742	CpA	1.21496	9.71967	4.37086	16.5267	31.4237
CpA__MSD_744	CpA	0.190089	1.52071	4.05224	8.26696	24.9621
CpA__MSD_745	CpA	0.0764433	0.611546	1.56745	3.28048	10.0249
CpA__MSD_746	CpA	1.14441	9.15526	3.50769	23.4465	45.4681
CpA__MSD_747	CpA	0.565514	4.52411	3.12976	7.49376	23.3624
CpA__MSD_748	CpA	3.38686	27.0949	8.69454	17.2754	35.3392
CpA__MSD_749	CpA	0.228359	1.82687	2.93912	5.00584	6.35321
CpA__MSD_750	CpA	0.125998	1.00798	1.7415	3.6077	5.20068
CpA__MSD_752	CpA	1.65599	13.2479	3.67718	6.15651	16.8976
CpA__MSD_753	CpA	0.329419	2.63535	2.73518	6.64978	13.0688
CpA__MSD_754	CpA	4.41769	35.3415	6.07753	19.9176	49.2918
CpA__MSD_756	CpA	0.0695294	0.556235	1.4566	5.50358	7.02805
CpA__MSD_757	CpA	0.709302	5.67442	2.73841	6.27907	17.8969
CpA__MSD_759	CpA	0.408944	3.27155	3.26699	8.70382	14.0278
CpA__MSD_760	CpA	0.275231	2.20185	1.93056	7.2434	14.5234
CpA__MSD_762	CpA	0.869551	6.95641	3.67629	21.5821	36.8589
CpA__MSD_763	CpA	0.0668534	0.534827	1.54559	2.86011	7.01755
CpA__MSD_764	CpA	0.12124	0.969916	2.55898	7.97001	13.2474
CpA__MSD_765	CpA	0.426233	3.40986	2.43848	10.2377	16.5622
CpA__MSD_766	CpA	0.478297	3.82638	3.87668	6.52525	18.2977
CpA__MSD_767	CpA	0.14832	1.18656	1.93774	6.9114	12.7515
CpA__MSD_768	CpA	0.0886877	0.709502	1.55922	4.55929	9.84308
CpA__MSD_770	CpA	0.530939	4.24751	2.56986	7.02067	28.6404
CpA__MSD_771	CpA	0.102753	0.822028	2.02301	6.62905	12.0143
CpA__MSD_772	CpA	0.107236	0.857891	2.76062	11.3018	17.6423
CpA__MSD_773	CpA	0.698256	5.58605	3.33587	10.6836	24.7634
CpA__MSD_775	CpA	0.227536	1.82029	3.27443	7.03706	15.5777
CpA__MSD_776	CpA	0.329892	2.63914	2.78956	16.1233	25.0905
CpA__MSD_777	CpA	0.119723	0.957785	1.70327	5.61909	9.45565
CpA__MSD_778	CpA	0.238303	1.90642	2.09227	9.81784	21.8282
CpA__MSD_779	CpA	3.33089	26.6471	6.52424	15.6968	51.4985
CpA__MSD_780	CpA	0.323249	2.58599	2.26167	8.52214	26.2577
CpA__MSD_781	CpA	2.69356	21.5485	7.20183	12.9563	41.6597
CpA__MSD_782	CpA	2.72269	21.7815	6.15022	12.8555	37.8289
CpA__MSD_783	CpA	0.229591	1.83673	2.51341	10.0296	19.5094
CpA__MSD_784	CpA	0.257415	2.05932	1.84528	6.15444	16.0088
CpA__MSD_785	CpA	0.567776	4.54221	2.5859	13.3034	23.1026
CpA__MSD_786	CpA	0.189328	1.51462	3.11145	7.28971	12.184
CpA__MSD_787	CpA	0.441375	3.531	2.87207	11.182	22.9378
CpA__MSD_788	CpA	1.34501	10.7601	3.87512	9.11802	13.2102
CpA__MSD_789	CpA	0.105789	0.84631	1.41021	7.38959	10.8328
CpA__MSD_790	CpA	0.16419	1.31352	2.99276	11.6714	19.1434
CpA__MSD_791	CpA	2.56245	20.4996	8.55924	21.4028	51.1784
CpA__MSD_792	CpA	0.553615	4.42892	2.47458	5.06028	10.0366
CpA__MSD_793	CpA	0.712448	5.69958	3.79368	11.7623	21.6539
CpA__MSD_794	CpA	2.98061	23.8449	5.02297	12.6143	36.6998
CpA__MSD_795	CpA	0.307506	2.46005	2.17046	5.03545	17.1615
CpA__MSD_796	CpA	0.234038	1.8723	2.78964	11.1984	26.3725
CpA__MSD_797	CpA	0.794606	6.35685	3.92804	14.5895	35.937
CpA__MSD_798	CpA	1.05117	8.40936	2.98877	8.52454	29.8973
CpA__MSD_799	CpA	0.977391	7.81913	3.44373	12.1898	25.5536
CpA__MSD_800	CpA	0.0996941	0.797553	1.55116	4.45139	18.3984
CpA__MSD_801	CpA	0.906671	7.25337	3.13549	9.5017	21.9284
CpA__MSD_802	CpA	1.63046	13.0437	4.65169	7.74616	24.4558
CpA__MSD_803	CpA	0.107001	0.856008	1.51119	5.67027	14.0366
CpA__MSD_804	CpA	1.23084	9.84672	3.98118	13.0387	28.2604
CpA__MSD_805	CpA	7.19285	57.5428	7.94007	21.8833	74.1754
CpA__MSD_807	CpA	0.114682	0.917453	4.70258	11.2437	16.9773
CpA__MSD_808	CpA	3.3614	26.8912	5.61358	12.3163	32.7347
CpA__MSD_810	CpA	0.293264	2.34611	2.00471	6.21591	19.8019
CpA__MSD_811	CpA	0.181631	1.45305	1.61067	6.3671	15.0848
CpA__MSD_812	CpA	3.73789	29.9031	8.15821	18.0432	33.761
CpA__MSD_816	CpA	0.141581	1.13265	1.5939	9.83359	12.4322
CpA__MSD_819	CpA	1.17148	9.37186	3.65571	13.6283	19.2311
CpA__MSD_820	CpA	0.747348	5.97878	5.3849	9.28477	19.7359
CpA__MSD_821	CpA	1.13163	9.05308	4.77906	16.5946	22.7532
CpA__MSD_822	CpA	0.13465	1.0772	1.79629	7.29469	19.5743
CpA__MSD_824	CpA	0.526963	4.2157	2.42623	4.54175	14.4147
CpA__MSD_825	CpA	0.11996	0.959684	2.56991	16.1453	20.7726
CpA__MSD_828	CpA	0.918765	7.35012	6.38813	9.93235	23.7862
CpA__MSD_829	CpA	0.351737	2.8139	3.65958	7.34237	19.4827
CpA__MSD_830	CpA	0.452091	3.61673	2.13802	4.36888	6.93959
CpA__MSD_831	CpA	3.07674	24.6139	7.09219	17.4516	27.945
CpA__MSD_833	CpA	0.116979	0.935832	1.52025	5.85489	17.7536
CpA__MSD_834	CpA	0.378376	3.02701	2.74067	10.7857	25.983
High_Salt__MSD_0	High_Salt	0.0755933	0.604746	1.76646	4.92109	11.0562
High_Salt__MSD_2	High_Salt	0.63676	5.09408	5.06909	10.6168	15.132
High_Salt__MSD_3	High_Salt	3.75416	30.0333	7.51202	15.744	35.9431
High_Salt__MSD_4	High_Salt	5.11576	40.9261	7.81351	17.3816	45.9318
High_Salt__MSD_5	High_Salt	0.242083	1.93666	2.12739	4.49401	8.02889
High_Salt__MSD_7	High_Salt	4.95651	39.6521	7.91087	19.2473	59.5209
High_Salt__MSD_8	High_Salt	8.47615	67.8092	9.22529	21.075	54.3194
High_Salt__MSD_10	High_Salt	1.8106	14.4848	7.63573	18.2542	48.5317
High_Salt__MSD_14	High_Salt	0.61092	4.88736	3.47037	10.8897	20.2191
High_Salt__MSD_15	High_Salt	2.08591	16.6873	4.14667	19.4294	50.4785
High_Salt__MSD_16	High_Salt	2.8694	22.9552	7.02994	13.8104	35.1271
High_Salt__MSD_17	High_Salt	3.22875	25.83	7.60602	22.9602	80.1794
High_Salt__MSD_18	High_Salt	5.62056	44.9645	8.2626	17.0516	84.4116
High_Salt__MSD_19	High_Salt	0.2739	2.1912	3.1002	8.71869	17.0792
High_Salt__MSD_20	High_Salt	6.4217	51.3736	9.38024	18.2217	53.5396
High_Salt__MSD_21	High_Salt	0.138017	1.10414	3.4582	6.44051	9.73948
High_Salt__MSD_22	High_Salt	1.3744	10.9952	4.099	6.60114	15.4368
High_Salt__MSD_24	High_Salt	1.96027	15.6822	5.97068	17.7059	25.8778
High_Salt__MSD_25	High_Salt	6.38035	51.0428	7.7706	16.7255	50.4689
High_Salt__MSD_26	High_Salt	1.38559	11.0847	5.44852	11.1783	26.5109
High_Salt__MSD_27	High_Salt	1.3105	10.484	3.94257	13.5767	23.0703
High_Salt__MSD_28	High_Salt	3.88471	31.0777	8.69805	17.2118	33.3345
High_Salt__MSD_29	High_Salt	7.02069	56.1655	9.45306	17.7108	69.9592
High_Salt__MSD_30	High_Salt	0.386065	3.08852	3.30703	7.86034	12.8217
High_Salt__MSD_31	High_Salt	2.1542	17.2336	4.95446	13.7092	47.6738
High_Salt__MSD_32	High_Salt	3.24496	25.9597	7.78711	19.2533	40.2133
High_Salt__MSD_33	High_Salt	5.78835	46.3068	7.88464	18.858	59.1841
High_Salt__MSD_34	High_Salt	1.45714	11.6571	4.88074	18.8783	43.8448
High_Salt__MSD_35	High_Salt	0.322554	2.58043	3.33645	5.74228	8.31314
High_Salt__MSD_36	High_Salt	6.39888	51.191	8.04233	16.9989	84.1057
High_Salt__MSD_37	High_Salt	4.68497	37.4798	7.20489	12.8818	29.1324
High_Salt__MSD_42	High_Salt	2.06405	16.5124	3.33392	20.7814	46.1089
High_Salt__MSD_43	High_Salt	0.364024	2.91219	5.16351	15.555	51.7479
High_Salt__MSD_45	High_Salt	1.4315	11.452	7.69257	18.0241	68.2168
High_Salt__MSD_46	High_Salt	4.27145	34.1716	7.92373	22.0238	85.5071
High_Salt__MSD_47	High_Salt	3.89194	31.1355	8.40705	22.1467	78.1308
High_Salt__MSD_48	High_Salt	3.47539	27.8031	8.1848	21.61	66.4883
High_Salt__MSD_49	High_Salt	5.12679	41.0143	8.3096	22.9951	135.307
High_Salt__MSD_51	High_Salt	1.71016	13.6813	7.61099	16.7984	74.4979
High_Salt__MSD_52	High_Salt	1.46056	11.6845	5.59217	14.9187	66.5519
High_Salt__MSD_54	High_Salt	0.0644894	0.515915	1.70197	6.92298	15.6905
High_Salt__MSD_56	High_Salt	1.7059	13.6472	4.49888	21.0317	62.2113
High_Salt__MSD_59	High_Salt	3.34757	26.7806	7.98275	17.1574	78.7628
High_Salt__MSD_61	High_Salt	3.39146	27.1317	8.54267	18.3883	99.3643
High_Salt__MSD_62	High_Salt	1.70584	13.6467	5.68225	15.2695	48.8521
High_Salt__MSD_63	High_Salt	1.03878	8.31023	3.21482	9.99805	34.2521
High_Salt__MSD_67	High_Salt	1.27778	10.2222	6.15278	18.2213	67.5358
High_Salt__MSD_68	High_Salt	4.7442	37.9536	8.2343	15.9806	89.4376
High_Salt__MSD_69	High_Salt	4.02964	32.2371	7.77634	19.2835	104.132
High_Salt__MSD_70	High_Salt	2.52016	20.1613	7.72678	21.1973	85.0474
High_Salt__MSD_71	High_Salt	0.283709	2.26967	3.49313	8.89782	15.8508
High_Salt__MSD_72	High_Salt	0.150668	1.20534	3.05396	8.63892	14.6759
High_Salt__MSD_73	High_Salt	1.13929	9.11435	4.9867	20.1401	43.9535
High_Salt__MSD_74	High_Salt	4.29511	34.3609	7.05921	16.3661	119.838
High_Salt__MSD_75	High_Salt	4.4291	35.4328	7.67437	17.4461	79.1113
High_Salt__MSD_76	High_Salt	2.21333	17.7066	6.43065	16.6342	50.6875
High_Salt__MSD_77	High_Salt	0.0901644	0.721315	1.83421	5.11224	11.5914
High_Salt__MSD_78	High_Salt	0.0880789	0.704631	2.79687	5.59839	16.4019
High_Salt__MSD_79	High_Salt	1.97341	15.7873	6.75691	15.8708	50.8978
High_Salt__MSD_80	High_Salt	0.510663	4.0853	2.56765	11.1965	14.928
High_Salt__MSD_81	High_Salt	0.956451	7.65161	5.09321	18.2861	38.6305
High_Salt__MSD_82	High_Salt	2.84486	22.7589	7.313	15.4437	67.3241
High_Salt__MSD_83	High_Salt	3.18916	25.5133	7.53355	16.5968	91.3903
High_Salt__MSD_85	High_Salt	3.50871	28.0697	7.16732	16.9764	60.9931
High_Salt__MSD_86	High_Salt	4.32356	34.5885	10.048	18.9341	56.8701
High_Salt__MSD_88	High_Salt	1.68381	13.4705	5.17239	18.3393	72.1792
High_Salt__MSD_89	High_Salt	2.52459	20.1967	7.39981	21.7461	64.6948
High_Salt__MSD_90	High_Salt	1.17656	9.41246	2.64893	15.2428	43.344
High_Salt__MSD_91	High_Salt	3.07048	24.5638	5.03765	22.9821	63.1241
High_Salt__MSD_94	High_Salt	2.10709	16.8567	5.59452	17.9217	56.3169
High_Salt__MSD_95	High_Salt	1.34848	10.7878	4.63967	17.5314	30.2852
High_Salt__MSD_97	High_Salt	2.7894	22.3152	7.82062	20.3644	68.4992
High_Salt__MSD_98	High_Salt	3.92702	31.4162	8.38272	20.0655	70.9643
High_Salt__MSD_99	High_Salt	0.100134	0.80107	1.82069	5.41167	13.0859
High_Salt__MSD_100	High_Salt	2.96545	23.7236	8.33065	12.5134	35.921
High_Salt__MSD_102	High_Salt	0.111216	0.889731	2.65425	12.2636	20.7986
High_Salt__MSD_103	High_Salt	1.87524	15.0019	4.58351	12.8348	63.4423
High_Salt__MSD_104	High_Salt	3.57341	28.5873	8.94973	20.338	71.1719
High_Salt__MSD_105	High_Salt	3.5734	28.5872	7.44789	22.4933	65.9763
High_Salt__MSD_106	High_Salt	1.8509	14.8072	9.13392	20.0137	52.5135
High_Salt__MSD_107	High_Salt	6.6776	53.4208	8.88555	21.2187	63.1789
High_Salt__MSD_108	High_Salt	4.68296	37.4637	6.28703	13.7749	47.9835
High_Salt__MSD_109	High_Salt	2.80353	22.4282	7.83537	16.7328	47.6317
High_Salt__MSD_111	High_Salt	3.32789	26.6231	5.4197	16.2605	54.6342
High_Salt__MSD_112	High_Salt	4.39633	35.1706	6.00284	23.0586	56.1785
High_Salt__MSD_114	High_Salt	1.47358	11.7886	5.17955	9.7146	31.8421
High_Salt__MSD_115	High_Salt	3.32144	26.5715	6.77956	19.3285	41.7131
High_Salt__MSD_116	High_Salt	3.54976	28.3981	8.44092	18.7697	47.8911
High_Salt__MSD_117	High_Salt	1.94097	15.5278	5.6956	13.664	51.8419
High_Salt__MSD_118	High_Salt	0.0877189	0.701751	1.89858	4.0421	7.41575
High_Salt__MSD_119	High_Salt	7.3313	58.6504	8.58423	16.4305	81.7684
High_Salt__MSD_120	High_Salt	1.58439	12.6751	6.79297	18.4097	43.6574
High_Salt__MSD_122	High_Salt	3.37431	26.9945	9.78663	20.7582	53.7002
High_Salt__MSD_123	High_Salt	0.38679	3.09432	4.48856	11.1791	15.3599
High_Salt__MSD_124	High_Salt	4.40144	35.2115	8.46514	19.4085	53.9159
High_Salt__MSD_125	High_Salt	1.56371	12.5097	5.10985	13.051	39.3038
High_Salt__MSD_126	High_Salt	5.95432	47.6346	8.87859	21.0444	60.415
High_Salt__MSD_127	High_Salt	0.708932	5.67146	6.62474	13.9811	20.2289
High_Salt__MSD_128	High_Salt	5.38731	43.0985	8.05535	19.0324	101.738
High_Salt__MSD_129	High_Salt	0.538315	4.30652	4.28459	11.9851	30.8847
High_Salt__MSD_130	High_Salt	1.48309	11.8647	4.09218	7.54677	16.6821
High_Salt__MSD_131	High_Salt	0.835521	6.68417	3.40627	8.27997	27.8906
High_Salt__MSD_135	High_Salt	1.45734	11.6587	5.50606	12.7693	23.7275
High_Salt__MSD_136	High_Salt	4.22446	33.7957	7.55385	18.7959	55.1303
High_Salt__MSD_137	High_Salt	2.70569	21.6455	8.75557	18.0739	71.9427
High_Salt__MSD_138	High_Salt	0.781471	6.25177	2.41385	6.10003	12.358
High_Salt__MSD_139	High_Salt	2.58906	20.7125	3.1731	19.5058	23.1102
High_Salt__MSD_140	High_Salt	1.88571	15.0857	3.61515	14.8169	36.3403
High_Salt__MSD_141	High_Salt	0.65818	5.26544	5.01388	19.3144	26.0401
High_Salt__MSD_142	High_Salt	0.165332	1.32266	3.71513	12.932	20.1441
High_Salt__MSD_144	High_Salt	0.0860137	0.68811	2.83049	16.0196	17.5169
High_Salt__MSD_145	High_Salt	1.06444	8.51555	1.75021	12.9433	18.2591
High_Salt__MSD_146	High_Salt	0.119202	0.953615	3.49559	7.32264	10.7614
High_Salt__MSD_147	High_Salt	0.674395	5.39516	3.00945	8.30004	12.2419
High_Salt__MSD_148	High_Salt	0.327609	2.62087	4.70612	12.3226	24.5202
High_Salt__MSD_154	High_Salt	0.204071	1.63257	4.94622	10.8693	12.8814
High_Salt__MSD_155	High_Salt	0.166077	1.32862	2.02691	8.33087	9.5055
High_Salt__MSD_156	High_Salt	0.298922	2.39138	3.52925	6.07109	11.5042
High_Salt__MSD_158	High_Salt	0.195531	1.56425	4.6018	9.58437	15.3504
High_Salt__MSD_159	High_Salt	0.492139	3.93711	3.40592	12.8069	24.6641
High_Salt__MSD_162	High_Salt	0.160495	1.28396	2.81723	5.68787	10.1764
High_Salt__MSD_163	High_Salt	0.599659	4.79727	3.89323	8.3561	17.3328
High_Salt__MSD_166	High_Salt	0.591642	4.73314	5.42667	15.1581	20.5483
High_Salt__MSD_167	High_Salt	0.682192	5.45754	3.76572	8.81446	13.2706
High_Salt__MSD_168	High_Salt	1.09794	8.78353	6.10962	20.0462	52.564
High_Salt__MSD_169	High_Salt	0.663288	5.3063	3.61566	14.7308	27.8219
High_Salt__MSD_170	High_Salt	1.1198	8.95841	6.34065	17.7955	25.3458
High_Salt__MSD_171	High_Salt	0.074835	0.59868	1.35235	5.1642	9.95527
High_Salt__MSD_172	High_Salt	1.65698	13.2558	5.44321	13.2345	31.1458
High_Salt__MSD_174	High_Salt	6.48451	51.8761	8.11975	19.7325	45.168
High_Salt__MSD_176	High_Salt	2.17889	17.4311	6.2298	22.6589	51.6487
High_Salt__MSD_177	High_Salt	1.0941	8.75281	3.66487	8.55818	18.9284
High_Salt__MSD_178	High_Salt	0.371874	2.97499	2.65707	10.8454	25.7231
High_Salt__MSD_179	High_Salt	0.232791	1.86233	4.07374	7.7996	15.6718
High_Salt__MSD_180	High_Salt	0.360826	2.88661	2.67726	16.6872	26.0819
High_Salt__MSD_181	High_Salt	0.0748276	0.598621	1.38437	5.58825	13.5366
High_Salt__MSD_182	High_Salt	0.512071	4.09657	3.48151	7.60983	9.94029
High_Salt__MSD_183	High_Salt	4.17915	33.4332	5.13153	19.5637	24.4712
High_Salt__MSD_185	High_Salt	0.255258	2.04206	3.43906	10.7592	16.6318
High_Salt__MSD_186	High_Salt	0.178992	1.43194	4.87555	20.3574	26.7818
High_Salt__MSD_187	High_Salt	1.26344	10.1075	3.14534	9.22895	16.2233
High_Salt__MSD_190	High_Salt	0.449138	3.5931	4.3231	12.6164	22.6017
High_Salt__MSD_191	High_Salt	0.533104	4.26483	3.76689	11.0534	18.3176
High_Salt__MSD_192	High_Salt	0.0722629	0.578103	4.9812	17.4395	24.2634
High_Salt__MSD_193	High_Salt	0.774345	6.19476	5.7342	11.0474	17.9989
High_Salt__MSD_195	High_Salt	0.272381	2.17905	2.64371	21.4662	27.4585
High_Salt__MSD_196	High_Salt	0.73501	5.88008	3.93845	7.70503	12.1472
High_Salt__MSD_198	High_Salt	0.0806387	0.64511	5.30126	11.6699	23.9563
High_Salt__MSD_199	High_Salt	3.32375	26.59	9.83776	15.2051	43.1297
High_Salt__MSD_200	High_Salt	0.641015	5.12812	3.8576	11.5585	19.4286
High_Salt__MSD_201	High_Salt	0.311635	2.49308	4.85526	10.2386	13.8655
High_Salt__MSD_203	High_Salt	0.0702757	0.562206	3.49437	10.0258	15.7515
High_Salt__MSD_204	High_Salt	0.286639	2.29311	5.18205	8.59411	12.7006
High_Salt__MSD_205	High_Salt	0.940299	7.52239	4.80204	11.2669	24.4881
High_Salt__MSD_206	High_Salt	1.4375	11.5	4.64715	13.8194	25.2463
High_Salt__MSD_207	High_Salt	1.39451	11.1561	5.98963	17.5748	22.1157
High_Salt__MSD_208	High_Salt	0.29265	2.3412	4.10833	14.6888	18.1855
High_Salt__MSD_209	High_Salt	0.0634214	0.507371	4.14331	12.1915	23.7204
High_Salt__MSD_210	High_Salt	0.257631	2.06105	3.69227	7.4423	13.9581
High_Salt__MSD_211	High_Salt	1.96846	15.7477	4.03723	18.3896	21.9481
High_Salt__MSD_212	High_Salt	0.579067	4.63254	3.82268	13.0146	20.1805
H3_H1__MSD_0	H3_H1c	0.15512	1.24096	3.22679	6.94558	10.4362
H3_H1__MSD_1	H3_H1c	0.190365	1.52292	4.37786	9.98062	13.5406
H3_H1__MSD_8	H3_H1c	0.275175	2.2014	4.44997	8.55105	13.4873
H3_H1__MSD_10	H3_H1c	0.48881	3.91048	3.26072	7.07713	13.9316
H3_H1__MSD_12	H3_H1c	0.190245	1.52196	3.20044	6.3348	12.4593
H3_H1__MSD_13	H3_H1c	0.423299	3.38639	3.29581	7.59786	16.4932
H3_H1__MSD_14	H3_H1c	0.0816486	0.653189	3.10994	6.63222	12.6979
H3_H1__MSD_15	H3_H1c	0.323739	2.58991	3.41981	7.15826	15.4407
H3_H1__MSD_17	H3_H1c	0.452087	3.6167	5.06428	10.0466	16.4904
H3_H1__MSD_18	H3_H1c	0.284171	2.27337	3.57876	11.6285	15.6888
H3_H1__MSD_19	H3_H1c	0.536154	4.28923	3.26226	8.89822	16.6984
H3_H1__MSD_20	H3_H1c	0.4236	3.3888	3.20451	5.65894	11.5682
H3_H1__MSD_21	H3_H1c	0.452601	3.62081	4.13879	9.55691	20.4043
H3_H1__MSD_22	H3_H1c	2.49955	19.9964	5.31822	15.2168	37.4524
H3_H1__MSD_25	H3_H1c	2.40968	19.2774	5.66391	14.6837	28.5299
H3_H1__MSD_26	H3_H1c	7.16039	57.2831	8.16799	21.4677	58.6832
H3_H1__MSD_28	H3_H1c	1.29335	10.3468	4.34157	11.2238	16.9311
H3_H1__MSD_29	H3_H1c	0.402885	3.22308	2.78815	9.94183	15.2577
H3_H1__MSD_31	H3_H1c	0.21537	1.72296	4.32873	11.8343	16.3118
H3_H1__MSD_32	H3_H1c	0.281228	2.24982	2.82972	4.42723	7.39987
H3_H1__MSD_36	H3_H1c	1.42352	11.3882	4.75102	11.317	17.4146
H3_H1__MSD_37	H3_H1c	0.29649	2.37192	4.16784	10.4094	17.7421
H3_H1__MSD_38	H3_H1c	0.205671	1.64537	3.97601	11.822	15.3697
H3_H1__MSD_39	H3_H1c	2.14339	17.1471	5.76319	10.3624	23.846
H3_H1__MSD_40	H3_H1c	0.15466	1.23728	2.93824	4.97538	8.003
H3_H1__MSD_43	H3_H1c	1.64515	13.1612	6.98356	22.8645	41.2786
H3_H1__MSD_45	H3_H1c	0.17357	1.38856	5.13393	14.2707	16.5768
H3_H1__MSD_46	H3_H1c	0.250361	2.00289	3.55327	9.32606	12.8474
H3_H1__MSD_48	H3_H1c	0.275985	2.20788	2.78556	5.15611	7.97039
H3_H1__MSD_49	H3_H1c	0.279191	2.23353	3.02897	6.27795	10.8411
H3_H1__MSD_50	H3_H1c	0.0649783	0.519826	2.39888	5.69325	8.96021
H3_H1__MSD_52	H3_H1c	0.402886	3.22309	6.66738	17.4675	19.7203
H3_H1__MSD_53	H3_H1c	0.177456	1.41965	3.12654	8.18562	18.9272
H3_H1__MSD_54	H3_H1c	1.00061	8.00488	5.107	15.3318	24.8685
H3_H1__MSD_55	H3_H1c	0.190489	1.52391	5.25724	10.4645	18.4427
H3_H1__MSD_56	H3_H1c	0.445848	3.56678	3.6683	11.2019	14.0719
H3_H1__MSD_59	H3_H1c	0.12257	0.980564	3.22656	8.80837	19.1746
H3_H1__MSD_62	H3_H1c	3.96779	31.7423	8.61609	17.5405	31.4973
H3_H1__MSD_63	H3_H1c	0.463824	3.71059	3.77253	12.1535	17.9392
H3_H1__MSD_64	H3_H1c	0.541477	4.33182	3.42527	6.07783	14.8655
H3_H1__MSD_65	H3_H1c	1.0653	8.52243	6.51409	17.794	30.7813
H3_H1__MSD_68	H3_H1c	0.659504	5.27603	7.84087	16.4014	25.4345
H3_H1__MSD_69	H3_H1c	6.42133	51.3706	8.38215	22.6242	41.5597
H3_H1__MSD_70	H3_H1c	0.236476	1.89181	3.94447	10.4043	18.0696
H3_H1__MSD_71	H3_H1c	0.168393	1.34714	4.37807	9.26224	13.4671
H3_H1__MSD_72	H3_H1c	0.681492	5.45194	5.26964	13.6573	16.1824
H3_H1__MSD_73	H3_H1c	2.51927	20.1542	6.32932	17.649	49.856
H3_H1__MSD_78	H3_H1c	0.211271	1.69017	4.41009	11.9032	16.5144
H3_H1__MSD_81	H3_H1c	0.400479	3.20383	3.24274	5.61447	10.5876
H3_H1__MSD_82	H3_H1c	1.2665	10.132	5.40263	9.99972	18.1614
H3_H1__MSD_83	H3_H1c	0.108334	0.866674	3.98804	6.83697	8.8728
H3_H1__MSD_84	H3_H1c	0.105056	0.840448	4.89092	8.66086	17.4057
H3_H1__MSD_85	H3_H1c	0.346711	2.77369	4.64208	8.34523	20.6127
H3_H1__MSD_87	H3_H1c	1.89656	15.1725	7.35173	19.8356	49.8315
H3_H1__MSD_88	H3_H1c	3.05373	24.4298	7.07122	20.7144	39.3629
H3_H1__MSD_91	H3_H1c	0.454196	3.63357	3.70844	8.41711	12.1965
H3_H1__MSD_92	H3_H1c	5.24276	41.9421	7.39761	20.3667	50.0526
H3_H1__MSD_93	H3_H1c	3.05927	24.4742	7.40119	19.0422	21.9724
H3_H1__MSD_94	H3_H1c	0.996651	7.97321	8.20647	16.4802	18.4923
H3_H1__MSD_96	H3_H1c	1.76849	14.1479	5.47573	14.4942	33.5323
H3_H1__MSD_97	H3_H1c	1.1115	8.892	4.7066	11.4908	26.1996
H3_H1__MSD_98	H3_H1c	0.0969592	0.775674	5.44061	11.1092	21.4203
H3_H1__MSD_99	H3_H1c	0.113318	0.906546	5.21254	12.7321	20.4688
H3_H1__MSD_100	H3_H1c	0.153939	1.23151	4.3746	12.1969	15.932
H3_H1__MSD_107	H3_H1c	0.433897	3.47118	3.3095	6.03837	21.8831
H3_H1__MSD_108	H3_H1c	0.287215	2.29772	3.02724	5.29399	11.1276
H3_H1__MSD_110	H3_H1c	0.462027	3.69622	3.98668	8.31659	16.3149
H3_H1__MSD_111	H3_H1c	0.0702902	0.562322	4.11075	11.3943	17.3302
H3_H1__MSD_112	H3_H1c	0.242515	1.94012	3.47296	10.6079	15.1865
H3_H1__MSD_114	H3_H1c	0.172127	1.37702	3.97826	9.53916	13.1843
H3_H1__MSD_115	H3_H1c	0.282351	2.25881	5.2716	13.917	36.5927
H3_H1__MSD_116	H3_H1c	0.469701	3.75761	5.13591	16.5955	26.3038
H3_H1__MSD_121	H3_H1c	0.386804	3.09443	2.87188	7.32879	11.9674
H3_H1__MSD_122	H3_H1c	0.477272	3.81818	5.71632	10.4509	20.0181
H3_H1__MSD_123	H3_H1c	0.48137	3.85096	3.99373	8.8493	19.9844
H3_H1__MSD_125	H3_H1c	1.64486	13.1589	7.6561	20.9171	39.6664
H3_H1__MSD_127	H3_H1c	0.334533	2.67626	4.46936	10.1135	17.9908
H3_H1__MSD_128	H3_H1c	4.9538	39.6304	6.76027	21.0424	32.9597
H3_H1__MSD_129	H3_H1c	0.17227	1.37816	4.26262	8.08578	13.1302
H3_H1__MSD_130	H3_H1c	0.771059	6.16847	4.7162	9.52343	18.6779
H3_H1__MSD_133	H3_H1c	0.630536	5.04429	9.3044	23.6115	31.1966
H3_H1__MSD_134	H3_H1c	0.192941	1.54353	3.87955	11.6729	14.1727
H3_H1__MSD_135	H3_H1c	0.87083	6.96664	3.51491	7.89658	13.7612
H3_H1__MSD_136	H3_H1c	0.310959	2.48767	4.41986	14.6098	20.277
H3_H1__MSD_137	H3_H1c	0.554461	4.43569	3.48072	8.3728	8.91864
H3_H1__MSD_138	H3_H1c	0.309851	2.47881	2.82572	6.28708	12.1346
H3_H1__MSD_139	H3_H1c	0.110143	0.881145	3.77861	7.70299	10.8815
H3_H1__MSD_140	H3_H1c	0.759813	6.0785	3.68346	9.13383	10.2417
H3_H1__MSD_141	H3_H1c	0.948632	7.58906	5.22093	11.2621	17.2606
H3_H1__MSD_142	H3_H1c	0.454748	3.63798	5.01232	8.50338	17.5117
H3_H1__MSD_143	H3_H1c	0.156197	1.24958	1.95612	4.22912	7.96462
H3_H1__MSD_146	H3_H1c	0.738644	5.90915	5.89448	13.2115	21.9567
H3_H1__MSD_147	H3_H1c	0.272033	2.17626	3.33822	6.39663	9.42547
H3_H1__MSD_149	H3_H1c	0.466094	3.72875	5.43707	15.1034	23.5481
H3_H1__MSD_150	H3_H1c	0.341934	2.73547	2.92933	6.95796	10.0327
H3_H1__MSD_151	H3_H1c	0.0839251	0.671401	2.2624	6.28944	9.38151
H3_H1__MSD_152	H3_H1c	0.26214	2.09712	3.02946	5.69412	10.6109
H3_H1__MSD_153	H3_H1c	2.02414	16.1931	3.48358	10.6601	23.9576
H3_H1__MSD_155	H3_H1c	6.37945	51.0356	8.00066	17.5527	43.9071
H3_H1__MSD_157	H3_H1c	4.22776	33.8221	5.83449	17.6508	25.236
H3_H1__MSD_158	H3_H1c	1.68437	13.475	3.64861	6.74718	17.8963
H3_H1__MSD_159	H3_H1c	0.561436	4.49149	5.2747	14.1522	24.2384
H3_H1__MSD_160	H3_H1c	0.279944	2.23955	3.79254	8.77415	15.2645
H3_H1__MSD_161	H3_H1c	0.541488	4.3319	3.52219	11.1599	14.3826
H3_H1__MSD_162	H3_H1c	0.105533	0.844263	4.45301	9.91405	15.2565
H3_H1__MSD_164	H3_H1c	0.267717	2.14174	3.5451	6.88555	14.6953
H3_H1__MSD_167	H3_H1c	0.464125	3.713	4.36307	10.8289	19.5407
H3_H1__MSD_170	H3_H1c	0.481315	3.85052	4.79481	11.1896	22.5138
H3_H1__MSD_174	H3_H1c	0.191422	1.53138	4.5519	9.90102	15.0543
H3_H1__MSD_177	H3_H1c	0.100855	0.80684	3.06079	9.90137	11.5883
H3_H1__MSD_179	H3_H1c	0.25616	2.04928	3.60551	11.0727	14.4727
H3_H1__MSD_182	H3_H1c	0.148783	1.19026	3.64576	7.63215	12.1082
H3_H1__MSD_184	H3_H1c	0.323586	2.58869	3.39651	9.62951	13.0455
H3_H1__MSD_185	H3_H1c	0.269543	2.15634	4.03094	10.6986	12.8705
H3_H1__MSD_186	H3_H1c	0.151865	1.21492	3.17807	7.23493	11.3961
H3_H1__MSD_187	H3_H1c	0.161881	1.29505	4.05869	8.6192	15.0196
H3_H1__MSD_188	H3_H1c	0.319731	2.55785	3.97317	9.29191	16.5318
H3_H1__MSD_190	H3_H1c	1.90006	15.2005	5.66442	15.82	25.3267
H3_H1__MSD_193	H3_H1c	0.700218	5.60174	5.09582	14.5796	19.7567
H3_H1__MSD_195	H3_H1c	0.358004	2.86403	7.04821	17.1931	24.9398
H3_H1__MSD_196	H3_H1c	0.226071	1.80857	3.82134	6.96942	14.9698
H3_H1__MSD_197	H3_H1c	0.186947	1.49558	3.59755	6.32629	12.6773
H3_H1__MSD_198	H3_H1c	0.216363	1.7309	3.39712	7.93006	14.8917
H3_H1__MSD_199	H3_H1c	0.183798	1.47038	4.68682	12.4719	16.0757
H3_H1__MSD_200	H3_H1c	0.348426	2.78741	4.59235	9.24838	22.4339
H3_H1__MSD_201	H3_H1c	0.758829	6.07063	4.10034	8.80396	14.6609
H3_H1__MSD_204	H3_H1c	0.282747	2.26198	3.48384	11.3059	18.5861
H3_H1__MSD_209	H3_H1c	0.390546	3.12437	3.02694	7.85871	11.0299
H3_H1__MSD_210	H3_H1c	0.0682699	0.546159	2.97107	6.92896	11.2138
H3_H1__MSD_212	H3_H1c	0.280612	2.2449	3.98717	8.18643	17.4422
H3_H1__MSD_213	H3_H1c	0.387539	3.10031	4.36069	11.7489	19.1134
H3_H1__MSD_214	H3_H1c	0.0814339	0.651471	4.00558	8.89111	15.9251
H3_H1__MSD_215	H3_H1c	0.222709	1.78167	4.112	7.46514	15.0374
H3_H1__MSD_218	H3_H1c	0.284465	2.27572	3.01263	7.3942	12.9248
H3_H1__MSD_219	H3_H1c	0.188099	1.50479	3.67077	8.11409	15.4286
H3_H1__MSD_220	H3_H1c	2.2441	17.9528	5.94769	17.6098	42.9261
H3_H1__MSD_221	H3_H1c	0.372569	2.98055	4.26621	10.259	16.9796
H3_H1__MSD_222	H3_H1c	0.070748	0.565984	3.19065	8.20667	10.2266
H3_H1__MSD_223	H3_H1c	0.199296	1.59437	4.61211	8.62771	17.2094
H3_H1__MSD_225	H3_H1c	0.484224	3.87379	3.83648	12.4324	18.7534
H3_H1__MSD_226	H3_H1c	0.130257	1.04206	3.05025	7.1039	12.4343
H3_H1__MSD_227	H3_H1c	0.665613	5.3249	4.23997	7.51012	15.7909
H3_H1__MSD_230	H3_H1c	0.0945545	0.756436	2.457	5.30637	10.9553
H3_H1__MSD_231	H3_H1c	1.74679	13.9743	5.51166	12.5081	25.3917
H3_H1__MSD_232	H3_H1c	0.25645	2.0516	3.91298	9.27228	13.2258
H3_H1__MSD_233	H3_H1c	0.101813	0.8145	4.02014	10.3234	13.7617
H3_H1__MSD_238	H3_H1c	4.59475	36.758	6.34585	19.2352	36.7632
H3_H1__MSD_243	H3_H1c	1.71485	13.7188	4.83979	17.6065	45.7241
H3_H1__MSD_244	H3_H1c	1.13839	9.10711	3.56083	12.7408	38.4964
H3_H1__MSD_245	H3_H1c	4.4905	35.924	7.52656	19.8278	61.9149
H3_H1__MSD_246	H3_H1c	2.10648	16.8518	11.0429	23.6614	34.8055
H3_H1__MSD_247	H3_H1c	4.8926	39.1408	7.5761	15.8185	39.9424
H3_H1__MSD_248	H3_H1c	2.26014	18.0811	7.25107	16.9339	26.3344
H3_H1__MSD_251	H3_H1c	1.56069	12.4855	2.92805	21.191	39.2129
H3_H1__MSD_252	H3_H1c	0.82635	6.6108	8.07779	23.4087	45.0259
H3_H1__MSD_253	H3_H1c	0.478095	3.82476	4.99435	15.1588	39.9634
H3_H1__MSD_254	H3_H1c	1.88756	15.1005	4.7625	12.7852	19.7852
H3_H1__MSD_255	H3_H1c	1.25608	10.0486	4.38919	15.3544	24.2608
H3_H1__MSD_259	H3_H1c	1.41866	11.3493	4.61458	15.4136	21.9336
H3_H1__MSD_261	H3_H1c	0.109565	0.876519	1.01005	5.57125	16.6048
H3_H1__MSD_263	H3_H1c	0.668881	5.35105	5.27694	12.9738	27.3978
H3_H1__MSD_264	H3_H1c	0.35801	2.86408	2.96571	7.94822	44.6944
H3_H1__MSD_265	H3_H1c	0.125773	1.00618	1.27486	3.25282	10.0549
H3_H1__MSD_266	H3_H1c	1.81905	14.5524	4.62	22.9911	37.4229
H3_H1__MSD_267	H3_H1c	0.80477	6.43816	3.47959	10.9883	32.6296
H3_H1__MSD_273	H3_H1c	17.9049	143.239	10.8333	21.8313	57.8931
H3_H1__MSD_275	H3_H1c	1.65546	13.2437	4.99852	17.3132	46.074
H3_H1__MSD_276	H3_H1c	1.51792	12.1434	4.67651	15.9591	35.802
H3_H1__MSD_278	H3_H1c	2.3607	18.8856	3.41297	16.3881	48.4773
H3_H1__MSD_279	H3_H1c	0.786828	6.29462	6.3321	13.521	30.0529
H3_H1__MSD_282	H3_H1c	0.365089	2.92071	4.96224	18.5557	36.3487
H3_H1__MSD_283	H3_H1c	1.98776	15.9021	4.90652	14.3656	50.7232
H3_H1__MSD_284	H3_H1c	0.37486	2.99888	2.04682	9.18919	23.46
H3_H1__MSD_287	H3_H1c	2.03864	16.3091	7.00539	19.8232	42.8536
H3_H1__MSD_288	H3_H1c	1.29825	10.386	8.39366	19.9145	32.4011
H3_H1__MSD_289	H3_H1c	8.36679	66.9343	9.46015	15.3199	50.5099
H3_H1__MSD_290	H3_H1c	13.1455	105.164	8.60763	22.7259	57.408
H3_H1__MSD_292	H3_H1c	0.471624	3.77299	2.69731	8.08276	25.6045
H3_H1__MSD_294	H3_H1c	0.51405	4.1124	6.73195	14.06	29.7282
H3_H1__MSD_296	H3_H1c	5.88694	47.0955	9.72421	23.567	52.1723
H3_H1__MSD_297	H3_H1c	1.24469	9.95753	3.04602	17.9035	43.6739
H3_H1__MSD_298	H3_H1c	9.56668	76.5334	10.8135	22.2952	46.9887
H3_H1__MSD_299	H3_H1c	2.38666	19.0933	4.6409	19.0499	46.2331
H3_H1__MSD_305	H3_H1c	9.23316	73.8653	10.5251	21.6846	59.8969
H3_H1__MSD_306	H3_H1c	11.6608	93.2866	13.4536	22.8678	65.7398
H3_H1__MSD_307	H3_H1c	4.20341	33.6273	5.73578	12.454	30.6132
H3_H1__MSD_308	H3_H1c	0.826573	6.61258	3.74658	12.1309	34.1046
H3_H1__MSD_310	H3_H1c	5.19308	41.5446	4.80449	14.9986	30.1696
H3_H1__MSD_311	H3_H1c	1.01132	8.09059	2.47481	9.0525	25.4376
H3_H1__MSD_313	H3_H1c	0.290567	2.32454	8.85613	16.9485	34.1071
H3_H1__MSD_314	H3_H1c	0.433899	3.47119	2.08489	5.15958	7.94886
H3_H1__MSD_317	H3_H1c	1.18535	9.48282	4.24898	12.2519	37.5768
H3_H1__MSD_319	H3_H1c	0.415159	3.32127	2.8601	8.93608	19.4348
H3_H1__MSD_322	H3_H1c	1.43942	11.5154	4.31251	17.352	31.8104
H3_H1__MSD_323	H3_H1c	1.2542	10.0336	3.62148	16.3576	43.949
H3_H1__MSD_324	H3_H1c	0.631127	5.04902	3.95946	6.80745	17.2866
H3_H1__MSD_325	H3_H1c	8.36235	66.8988	9.71224	18.2451	55.4671
H3_H1__MSD_328	H3_H1c	3.50462	28.037	4.18677	21.9147	34.0366
H3_H1__MSD_331	H3_H1c	1.37512	11.001	5.84518	11.3667	21.5279
H3_H1__MSD_334	H3_H1c	0.119669	0.95735	4.58905	17.2818	28.6039
H3_H1__MSD_335	H3_H1c	0.327935	2.62348	1.84343	13.9513	26.448
H3_H1__MSD_337	H3_H1c	4.82549	38.6039	10.6173	23.9592	51.9039
H3_H1__MSD_339	H3_H1c	3.00318	24.0254	6.04107	18.6188	35.9634
H3_H1__MSD_343	H3_H1c	0.0807834	0.646267	1.6019	5.03797	5.86536
H3_H1__MSD_345	H3_H1c	0.809174	6.47339	2.32743	7.04832	21.103
H3_H1__MSD_346	H3_H1c	4.83657	38.6926	9.09515	23.6955	33.8223
H3_H1__MSD_351	H3_H1c	4.09069	32.7255	5.08282	23.1296	45.5288
H3_H1__MSD_352	H3_H1c	1.69891	13.5913	3.86263	12.2545	54.0524
H3_H1__MSD_353	H3_H1c	0.717041	5.73633	4.08343	7.52232	17.7828
H3_H1__MSD_354	H3_H1c	0.751827	6.01462	5.09628	15.6169	28.9753
H3_H1__MSD_355	H3_H1c	0.0769288	0.61543	1.38586	3.33422	8.59548
H3_H1__MSD_357	H3_H1c	0.211719	1.69375	3.42377	8.91158	12.9497
H3_H1__MSD_360	H3_H1c	3.8204	30.5632	6.44843	22.0178	55.9221
H3_H1__MSD_361	H3_H1c	1.72887	13.831	7.73166	16.4158	26.6474
H3_H1__MSD_362	H3_H1c	2.31695	18.5356	6.14094	18.5177	39.5448
H3_H1__MSD_363	H3_H1c	0.253586	2.02869	3.1623	14.8917	32.2208
H3_H1__MSD_365	H3_H1c	0.568821	4.55057	3.50771	12.2685	20.5803
H3_H1__MSD_366	H3_H1c	3.47456	27.7965	5.91132	9.81362	32.047
H3_H1__MSD_368	H3_H1c	3.07425	24.594	10.3303	23.7389	33.9561
H3_H1__MSD_369	H3_H1c	4.92789	39.4231	6.88381	14.2241	48.7781
H3_H1__MSD_371	H3_H1c	1.51175	12.094	4.29694	15.1637	42.1727
H3_H1__MSD_372	H3_H1c	0.816017	6.52814	2.7372	7.3922	18.1195
H3_H1__MSD_373	H3_H1c	2.25154	18.0123	7.04837	18.1126	38.4537
H3_H1__MSD_374	H3_H1c	2.48346	19.8677	5.33406	14.8962	47.1104
H3_H1__MSD_375	H3_H1c	5.93054	47.4443	5.20269	23.7187	46.9095
H3_H1__MSD_378	H3_H1c	0.59316	4.74528	3.63778	9.83927	20.7799
H3_H1__MSD_379	H3_H1c	3.26725	26.138	5.95127	13.5277	31.7293
H3_H1__MSD_381	H3_H1c	0.446245	3.56996	2.24748	6.88386	10.9275
H3_H1__MSD_382	H3_H1c	3.11129	24.8903	8.85749	22.2912	59.1333
H3_H1__MSD_383	H3_H1c	0.145656	1.16525	2.24067	6.7508	9.09015
H3_H1__MSD_385	H3_H1c	0.424649	3.39719	2.58371	13.5788	38.7606
H3_H1__MSD_386	H3_H1c	2.51898	20.1518	6.80726	18.1126	32.655
H3_H1__MSD_387	H3_H1c	5.32491	42.5993	7.70131	18.2944	40.2364
H3_H1__MSD_388	H3_H1c	2.34914	18.7931	3.29707	11.9514	20.6331
H3_H1__MSD_389	H3_H1c	16.1451	129.161	9.86637	21.0766	66.3571
H3_H1__MSD_391	H3_H1c	5.21697	41.7358	13.4991	22.2753	66.1232
H3_H1__MSD_395	H3_H1c	3.1618	25.2944	4.50445	13.6899	22.47
H3_H1__MSD_396	H3_H1c	0.220916	1.76733	1.74979	4.7789	13.6963
H3_H1__MSD_397	H3_H1c	0.50969	4.07752	3.35794	17.5931	55.5263
H3_H1__MSD_398	H3_H1c	0.969964	7.75971	2.84	11.7596	35.1853
H3_H1__MSD_399	H3_H1c	1.68057	13.4446	4.4004	14.6995	21.5125
H3_H1__MSD_400	H3_H1c	2.03898	16.3118	3.71949	14.4043	28.04
H3_H1__MSD_401	H3_H1c	1.2333	9.86638	3.73452	11.1656	21.8544
H3_H1__MSD_402	H3_H1c	0.179854	1.43883	2.03548	10.0155	10.6636
H3_H1__MSD_403	H3_H1c	0.627036	5.01629	2.21011	8.88073	16.5402
H3_H1__MSD_406	H3_H1c	0.146261	1.17009	1.70005	5.92083	11.5719
H3_H1__MSD_407	H3_H1c	0.491382	3.93106	3.49583	9.73955	23.2253
H3_H1__MSD_409	H3_H1c	2.651	21.208	5.79163	15.8896	70.3851
H3_H1__MSD_410	H3_H1c	3.40611	27.2489	8.30918	17.6287	41.0199
H3_H1__MSD_411	H3_H1c	0.675458	5.40366	3.43963	11.5527	18.704
H3_H1__MSD_412	H3_H1c	1.89915	15.1932	3.39781	9.41206	17.6451
H3_H1__MSD_414	H3_H1c	1.23008	9.84064	4.4403	14.4547	42.1956
H3_H1__MSD_416	H3_H1c	0.10065	0.805203	1.97421	8.88882	14.6159
H3_H1__MSD_418	H3_H1c	1.12778	9.02223	2.98808	9.22295	14.7465
H3_H1__MSD_419	H3_H1c	1.79612	14.369	3.95326	11.2604	71.5523
H3_H1__MSD_420	H3_H1c	1.30175	10.414	3.4306	12.023	16.4377
H3_H1__MSD_421	H3_H1c	1.5519	12.4152	2.59094	10.4583	22.0281
H3_H1__MSD_422	H3_H1c	0.221275	1.7702	3.59882	6.84452	9.1255
H3_H1__MSD_424	H3_H1c	0.570849	4.56679	4.07996	14.8899	37.2436
H3_H1__MSD_427	H3_H1c	0.0709356	0.567485	1.10755	2.24425	6.57981
H3_H1__MSD_428	H3_H1c	0.157224	1.25779	3.9579	9.43083	12.4146
H3_H1__MSD_429	H3_H1c	3.05316	24.4253	3.99657	13.2813	27.0132
H3_H1__MSD_430	H3_H1c	3.05259	24.4207	5.12472	16.5046	56.6909
H3_H1__MSD_431	H3_H1c	0.124184	0.993471	1.27231	2.83611	6.11745
H3_H1__MSD_432	H3_H1c	0.446545	3.57236	3.51489	15.7613	42.4377
H3_H1__MSD_433	H3_H1c	3.3314	26.6512	5.66944	17.7828	73.7831
H3_H1__MSD_435	H3_H1c	0.618326	4.94661	2.59795	9.52313	43.8959
H3_H1__MSD_436	H3_H1c	3.18255	25.4604	9.53772	18.25	49.1034
H3_H1__MSD_438	H3_H1c	4.96943	39.7554	7.24641	22.9637	95.7383
H3_H1__MSD_440	H3_H1c	15.7058	125.646	9.83323	20.1194	58.8825
H3_H1__MSD_441	H3_H1c	0.801054	6.40843	3.84398	22.5323	31.9125
H3_H1__MSD_442	H3_H1c	1.38603	11.0882	5.80997	15.9897	30.1945
H3_H1__MSD_443	H3_H1c	1.05243	8.41944	4.88509	10.5285	25.1708
H3_H1__MSD_444	H3_H1c	0.0760426	0.608341	2.89726	16.5771	20.418
H3_H1__MSD_445	H3_H1c	4.7405	37.924	8.22966	19.0616	34.6095
H3_H1__MSD_446	H3_H1c	0.109734	0.877876	1.42049	3.56195	31.2799
H3_H1__MSD_448	H3_H1c	2.49281	19.9425	5.09331	17.7561	55.884
H3_H1__MSD_449	H3_H1c	0.341001	2.72801	2.90147	12.2625	37.5078
H3_H1__MSD_450	H3_H1c	2.63903	21.1122	6.48971	17.0028	34.5785
H3_H1__MSD_451	H3_H1c	0.67985	5.4388	4.03981	10.4339	13.2488
H3_H1__MSD_453	H3_H1c	0.0877666	0.702133	1.22673	2.32088	5.19795
H3_H1__MSD_454	H3_H1c	0.846321	6.77057	4.31396	23.8305	49.0611
H3_H1__MSD_456	H3_H1c	1.53055	12.2444	4.08223	23.1652	67.8926
H3_H1__MSD_457	H3_H1c	0.141365	1.13092	2.05643	5.35398	31.4797
H3_H1__MSD_460	H3_H1c	3.25941	26.0753	5.38517	17.3674	26.7661
H3_H1__MSD_465	H3_H1c	0.313054	2.50443	1.28647	15.0431	32.016
H3_H1__MSD_466	H3_H1c	0.119365	0.954918	4.79098	13.1487	22.7024
H3_H1__MSD_467	H3_H1c	0.441109	3.52887	2.81076	10.3469	18.1256
H3_H1__MSD_468	H3_H1c	0.980394	7.84315	3.91681	13.9778	62.354
H3_H1__MSD_470	H3_H1c	3.47509	27.8007	5.58065	14.4765	24.2676
H3_H1__MSD_471	H3_H1c	2.75243	22.0194	4.52074	23.7013	65.4161
H3_H1__MSD_473	H3_H1c	1.74766	13.9813	4.94709	11.2988	23.0474
H3_H1__MSD_474	H3_H1c	2.77301	22.1841	10.8779	21.2621	37.8055
H3_H1__MSD_476	H3_H1c	4.48698	35.8958	9.62978	19.1895	48.3959
H3_H1__MSD_477	H3_H1c	0.264581	2.11665	2.74983	10.8921	14.712
H3_H1__MSD_478	H3_H1c	11.7303	93.8425	7.8401	22.5855	55.3324
H3_H1__MSD_480	H3_H1c	1.86928	14.9542	4.58672	12.1381	41.2687
H3_H1__MSD_481	H3_H1c	4.99739	39.9791	8.45542	14.6511	38.8946
H3_H1__MSD_482	H3_H1c	0.458826	3.67061	3.30812	12.6918	24.4262
H3_H1__MSD_483	H3_H1c	0.140705	1.12564	1.54522	4.06029	8.02261
H3_H1__MSD_484	H3_H1c	1.60488	12.839	4.58967	10.5464	37.0794
H3_H1__MSD_485	H3_H1c	0.323947	2.59158	2.7744	8.83798	19.2922
H3_H1__MSD_486	H3_H1c	1.35715	10.8572	4.87441	16.8685	29.1607
H3_H1__MSD_487	H3_H1c	0.273892	2.19114	2.10603	4.36335	15.139
H3_H1__MSD_488	H3_H1c	3.14812	25.185	7.23511	18.1377	65.809
H3_H1__MSD_489	H3_H1c	0.292631	2.34105	2.46956	6.43448	6.83845
H3_H1__MSD_490	H3_H1c	0.293156	2.34525	2.33112	6.99193	23.6837
H3_H1__MSD_492	H3_H1c	0.495256	3.96205	5.03001	16.0435	29.5213
H3_H1__MSD_493	H3_H1c	0.0716475	0.57318	1.06958	2.93986	6.17166
H3_H1__MSD_494	H3_H1c	0.116002	0.928013	3.8191	12.0069	14.7198
H3_H1__MSD_495	H3_H1c	9.87678	79.0142	7.45447	15.5299	50.5725
H3_H1__MSD_498	H3_H1c	1.2539	10.0312	3.71093	11.8125	21.3146
H3_H1__MSD_499	H3_H1c	7.45512	59.641	11.1705	15.8542	39.361
H3_H1__MSD_500	H3_H1c	0.453314	3.62651	3.10392	5.51534	11.2772
H3_H1__MSD_501	H3_H1c	1.17159	9.37272	3.21692	9.20933	31.69
H3_H1__MSD_502	H3_H1c	0.154625	1.237	3.73346	7.92491	12.8084
H3_H1__MSD_503	H3_H1c	6.22535	49.8028	8.7761	13.7984	37.1033
H3_H1__MSD_504	H3_H1c	1.59711	12.7769	4.46239	11.7601	25.6141
H3_H1__MSD_505	H3_H1c	0.216389	1.73111	1.27571	4.1527	7.2329
H3_H1__MSD_506	H3_H1c	0.252897	2.02318	1.87458	3.61335	8.34871
H3_H1__MSD_508	H3_H1c	0.205941	1.64753	2.89859	6.56917	9.79586
H3_H1__MSD_509	H3_H1c	0.170038	1.3603	2.77975	7.22948	11.3874
H3_H1__MSD_511	H3_H1c	1.39221	11.1377	8.01216	14.7052	34.0975
H3_H1__MSD_512	H3_H1c	0.158395	1.26716	1.57945	6.54643	16.3457
H3_H1__MSD_513	H3_H1c	0.268956	2.15165	3.44955	10.1599	10.4636
H3_H1__MSD_514	H3_H1c	1.21378	9.71027	6.08303	14.1529	24.3086
H3_H1__MSD_515	H3_H1c	3.85216	30.8173	7.94486	17.9036	26.3695
H3_H1__MSD_516	H3_H1c	1.57923	12.6338	8.53772	17.504	35.9605
H3_H1__MSD_518	H3_H1c	0.210176	1.68141	1.77708	5.54227	19.2231
H3_H1__MSD_519	H3_H1c	0.0954125	0.7633	2.76998	6.41366	15.0026
H3_H1__MSD_520	H3_H1c	0.179345	1.43476	1.48402	4.33745	11.8676
H3_H1__MSD_522	H3_H1c	0.327163	2.6173	2.09557	4.67931	19.5745
H3_H1__MSD_523	H3_H1c	0.0950644	0.760515	1.14403	3.8184	31.1072
H3_H1__MSD_524	H3_H1c	0.561383	4.49106	3.31662	9.02786	24.9898
H3_H1__MSD_525	H3_H1c	0.399394	3.19515	2.08048	8.08224	22.0305
H3_H1__MSD_527	H3_H1c	0.103128	0.825025	2.70603	5.25558	11.5442
H3_H1__MSD_530	H3_H1c	0.113037	0.904295	5.22952	9.94742	15.4588
H3_H1__MSD_531	H3_H1c	0.178686	1.42949	3.47446	7.25383	13.5912
H3_H1__MSD_533	H3_H1c	0.108789	0.870314	1.46668	2.8172	6.82546
H3_H1__MSD_536	H3_H1c	3.50298	28.0238	9.71309	16.9721	35.6114
H3_H1__MSD_539	H3_H1c	2.06366	16.5093	5.81589	12.4904	39.2204
H3_H1__MSD_543	H3_H1c	0.262886	2.10309	2.0402	14.7491	39.4959
H3_H1__MSD_544	H3_H1c	3.30242	26.4194	6.54859	15.2425	65.1224
H3_H1__MSD_545	H3_H1c	0.193605	1.54884	2.57523	7.22367	33.3805
H3_H1__MSD_547	H3_H1c	3.85215	30.8172	9.69573	17.8574	32.4287
H3_H1__MSD_548	H3_H1c	4.43199	35.4559	9.88454	15.1204	38.3216
H3_H1__MSD_550	H3_H1c	4.15576	33.2461	8.68896	13.8242	40.9946
H3_H1__MSD_551	H3_H1c	10.4369	83.4956	9.05729	18.4052	55.7084
H3_H1__MSD_552	H3_H1c	0.0806805	0.645444	1.02952	5.33191	17.5744
H3_H1__MSD_553	H3_H1c	0.692386	5.53909	3.24545	5.77978	12.3169
H3_H1__MSD_555	H3_H1c	0.0745269	0.596215	2.06944	4.77442	9.99415
H3_H1__MSD_557	H3_H1c	0.19734	1.57872	2.02065	13.0224	16.2016
H3_H1__MSD_558	H3_H1c	1.29862	10.389	5.24605	12.5245	27.3814
H3_H1__MSD_559	H3_H1c	4.5352	36.2816	6.80527	16.5034	53.0895
H3_H1__MSD_560	H3_H1c	2.66125	21.29	4.99663	18.546	76.6415
H3_H1__MSD_561	H3_H1c	0.937066	7.49653	6.32847	15.531	33.1241
H3_H1__MSD_562	H3_H1c	0.814194	6.51355	5.15295	10.2984	16.0572
H3_H1__MSD_563	H3_H1c	1.80006	14.4005	7.33509	13.9698	35.435
H3_H1__MSD_565	H3_H1c	0.207152	1.65722	2.00956	5.4778	10.4947
H3_H1__MSD_566	H3_H1c	0.786971	6.29577	4.19357	9.72123	23.2298
H3_H1__MSD_567	H3_H1c	0.667694	5.34155	2.48293	11.5242	50.6914
H3_H1__MSD_568	H3_H1c	0.353504	2.82803	1.34001	7.24598	14.2736
H3_H1__MSD_569	H3_H1c	0.715729	5.72583	3.25698	6.69007	23.5769
H3_H1__MSD_570	H3_H1c	1.60909	12.8727	3.22414	10.57	17.4136
H3_H1__MSD_572	H3_H1c	5.89584	47.1667	12.109	18.7089	51.3079
H3_H1__MSD_574	H3_H1c	0.631181	5.04945	3.81869	7.69969	14.0033
H3_H1__MSD_575	H3_H1c	0.387005	3.09604	5.55783	11.5707	21.9556
H3_H1__MSD_577	H3_H1c	0.0662799	0.530239	2.14494	6.5179	11.6315
H3_H1__MSD_578	H3_H1c	0.109437	0.875496	1.74644	5.4925	29.0508
H3_H1__MSD_580	H3_H1c	0.11866	0.949276	1.48048	3.30866	11.0158
H3_H1__MSD_582	H3_H1c	0.344574	2.75659	1.67944	13.3902	23.4634
H3_H1__MSD_583	H3_H1c	0.518352	4.14682	3.02039	10.2016	32.8399
H3_H1__MSD_585	H3_H1c	1.04491	8.35929	4.87859	8.49732	18.9761
H3_H1__MSD_586	H3_H1c	0.293286	2.34629	1.82608	11.5378	25.5504
H3_H1__MSD_587	H3_H1c	5.13806	41.1045	6.45148	16.1185	46.335
H3_H1__MSD_588	H3_H1c	1.73152	13.8522	6.01867	11.8634	18.5024
H3_H1__MSD_590	H3_H1c	9.01199	72.0959	7.35222	18.4332	50.5946
H3_H1__MSD_592	H3_H1c	1.07568	8.60543	3.45269	7.92622	24.8501
H3_H1__MSD_593	H3_H1c	0.911054	7.28843	4.23875	10.2332	25.8211
H3_H1__MSD_594	H3_H1c	3.91396	31.3117	7.66255	14.8332	39.0955
H3_H1__MSD_595	H3_H1c	0.426025	3.4082	3.3129	9.86121	15.3744
H3_H1__MSD_596	H3_H1c	0.384059	3.07247	3.10246	8.10481	30.1266
H3_H1__MSD_597	H3_H1c	6.40618	51.2494	8.43399	18.4851	46.2958
H3_H1__MSD_598	H3_H1c	1.4063	11.2504	2.74243	14.3809	28.1371
H3_H1__MSD_599	H3_H1c	0.150913	1.2073	5.69229	16.8396	31.6047
H3_H1__MSD_600	H3_H1c	1.17112	9.36894	4.29444	14.7899	48.1322
H3_H1__MSD_601	H3_H1c	0.0765535	0.612428	3.16411	8.49902	11.6716
H3_H1__MSD_602	H3_H1c	0.326694	2.61355	3.26351	7.08033	14.8111
H3_H1__MSD_605	H3_H1c	1.09479	8.75829	4.73242	13.8558	20.4479
H3_H1__MSD_608	H3_H1c	3.47313	27.785	8.29649	16.8935	24.9983
H3_H1__MSD_610	H3_H1c	0.563661	4.50929	2.24347	8.1355	27.122
H3__MSD_2	H3c	0.642059	5.13647	3.52903	15.5989	20.1642
H3__MSD_3	H3c	2.07408	16.5926	7.02193	9.88299	21.2807
H3__MSD_5	H3c	1.21346	9.70769	5.91056	13.6676	16.104
H3__MSD_6	H3c	2.3399	18.7192	5.10467	11.8879	26.0174
H3__MSD_8	H3c	0.750364	6.00291	6.5141	14.3327	33.2949
H3__MSD_9	H3c	0.288701	2.30961	1.87713	4.49973	8.80145
H3__MSD_10	H3c	0.457444	3.65955	3.06882	8.91126	13.4608
H3__MSD_11	H3c	0.452844	3.62275	3.45271	8.50222	20.4448
H3__MSD_12	H3c	0.74174	5.93392	3.76647	7.52978	16.2823
H3__MSD_13	H3c	3.73339	29.8671	6.17295	14.8598	25.9917
H3__MSD_15	H3c	0.168767	1.35014	2.5736	4.38232	6.85045
H3__MSD_17	H3c	0.621965	4.97572	4.73809	10.8906	20.8822
H3__MSD_18	H3c	1.63098	13.0478	5.82997	10.8769	18.1428
H3__MSD_19	H3c	3.03734	24.2987	5.99628	15.3367	23.7552
H3__MSD_20	H3c	3.99361	31.9489	7.9741	10.3597	24.1177
H3__MSD_21	H3c	6.08303	48.6642	9.46145	15.4487	43.8722
H3__MSD_22	H3c	0.15156	1.21248	1.03931	11.0947	12.526
H3__MSD_23	H3c	2.47907	19.8326	5.8999	10.3171	30.795
H3__MSD_24	H3c	3.58284	28.6627	8.22026	15.5073	31.6127
H3__MSD_25	H3c	0.216092	1.72874	2.76849	6.76933	9.95295
H3__MSD_26	H3c	2.23267	17.8614	4.54163	15.0374	34.9183
H3__MSD_27	H3c	0.309366	2.47493	2.23196	4.97198	9.37382
H3__MSD_30	H3c	0.973049	7.78439	5.12206	12.4456	26.9313
H3__MSD_31	H3c	1.1017	8.81363	5.64398	11.2523	26.8803
H3__MSD_32	H3c	0.168	1.344	5.32668	10.4025	20.192
H3__MSD_35	H3c	0.605487	4.8439	3.58329	8.6098	14.3996
H3__MSD_36	H3c	0.538663	4.3093	3.30459	6.67486	9.36527
H3__MSD_38	H3c	0.823192	6.58554	2.47773	7.65718	14.0643
H3__MSD_39	H3c	1.35387	10.831	2.83269	12.0275	23.1549
H3__MSD_40	H3c	0.210909	1.68727	1.17264	3.74686	8.14161
H3__MSD_41	H3c	1.23137	9.85097	2.64079	10.1647	10.8326
H3__MSD_42	H3c	0.839054	6.71243	2.27959	6.47011	12.4131
H3__MSD_43	H3c	4.25437	34.035	5.5213	14.3288	18.3245
H3__MSD_44	H3c	0.324504	2.59603	1.43027	5.40765	10.7622
H3__MSD_45	H3c	1.15947	9.27574	2.96657	10.0001	17.6507
H3__MSD_49	H3c	0.400459	3.20367	1.52349	7.54559	19.9189
H3__MSD_54	H3c	0.546854	4.37483	1.89453	8.87212	16.9114
H3__MSD_59	H3c	0.157807	1.26246	1.30223	3.90532	5.12713
H3__MSD_62	H3c	0.0704699	0.563759	1.99218	5.69892	8.94608
H3__MSD_64	H3c	1.30645	10.4516	5.90327	11.2127	28.8023
H3__MSD_65	H3c	0.995664	7.96531	4.77504	12.3056	26.3753
H3__MSD_66	H3c	1.08717	8.69738	5.74286	14.1445	45.2484
H3__MSD_67	H3c	0.124391	0.99513	5.28163	10.5417	19.4212
H3__MSD_70	H3c	0.622001	4.97601	3.58168	8.72205	15.0229
H3__MSD_72	H3c	0.524459	4.19567	3.32695	6.54459	9.47155
H3__MSD_75	H3c	1.0567	8.4536	4.41271	13.4676	28.1158
H3__MSD_79	H3c	2.65419	21.2335	5.90667	10.0636	30.8376
H3__MSD_80	H3c	2.6584	21.2672	8.43925	15.542	32.1887
H3__MSD_81	H3c	0.261056	2.08845	2.52846	6.80195	8.15307
H3__MSD_82	H3c	2.50773	20.0618	4.92905	14.3188	42.175
H3__MSD_83	H3c	0.302733	2.42186	2.23009	4.99958	8.73324
H3__MSD_86	H3c	0.690549	5.52439	3.52777	15.7401	21.537
H3__MSD_87	H3c	2.09757	16.7806	7.02455	9.97235	21.4263
H3__MSD_89	H3c	1.2134	9.70717	5.90027	13.6481	15.8925
H3__MSD_90	H3c	2.42765	19.4212	5.15081	12.0275	27.4087
H3__MSD_92	H3c	1.55777	12.4622	6.21501	12.5644	29.4287
H3__MSD_93	H3c	0.296096	2.36877	1.90312	4.59623	8.9656
H3__MSD_94	H3c	0.492231	3.93785	3.07454	8.76713	11.5825
H3__MSD_95	H3c	0.608456	4.86765	2.89657	7.54559	19.9189
H3__MSD_96	H3c	0.683567	5.46854	3.56607	7.39246	15.0189
H3__MSD_97	H3c	3.79935	30.3948	6.15773	15.0026	26.8384
H3__MSD_99	H3c	0.187626	1.50101	2.56222	3.62697	5.92909
H3__MSD_103	H3c	0.152395	1.21916	2.08122	5.32871	8.54449
H3__MSD_104	H3c	0.140636	1.12509	2.0136	5.34207	7.52936
H3__MSD_106	H3c	0.282155	2.25724	3.3471	8.22981	11.2002
H3__MSD_107	H3c	0.153915	1.23132	3.46262	6.30156	14.6735
H3_Mono__MSD_0	H3mono	9.7864	78.2912	10.3731	21.8264	66.4548
H3_Mono__MSD_1	H3mono	9.85434	78.8347	10.5393	18.8957	101.878
H3_Mono__MSD_7	H3mono	9.54017	76.3214	12.9285	23.4665	76.302
H3_Mono__MSD_10	H3mono	0.282788	2.2623	4.13104	11.4189	20.9947
H3_Mono__MSD_11	H3mono	4.09689	32.7751	7.82724	17.3715	62.313
H3_Mono__MSD_12	H3mono	4.50457	36.0366	8.27604	15.5217	27.788
H3_Mono__MSD_13	H3mono	2.1533	17.2264	4.99101	10.0149	22.2575
H3_Mono__MSD_15	H3mono	0.0722383	0.577906	1.50692	3.0561	9.77009
H3_Mono__MSD_16	H3mono	2.8075	22.46	8.69364	18.5806	36.4428
H3_Mono__MSD_17	H3mono	2.02973	16.2378	4.50884	13.676	40.8141
H3_Mono__MSD_18	H3mono	2.12991	17.0393	6.34726	21.981	39.6043
H3_Mono__MSD_20	H3mono	1.16971	9.35767	8.90977	14.4677	34.4594
H3_Mono__MSD_21	H3mono	0.448132	3.58506	6.30387	15.4928	24.2313
H3_Mono__MSD_23	H3mono	4.19838	33.587	6.39137	17.6135	64.6189
H3_Mono__MSD_24	H3mono	4.26761	34.1409	5.79394	18.5104	43.6671
H3_Mono__MSD_25	H3mono	0.70252	5.62016	3.44275	9.08524	16.7336
H3_Mono__MSD_26	H3mono	2.56594	20.5275	8.7731	16.0684	38.7058
H3_Mono__MSD_27	H3mono	0.181589	1.45271	2.17874	7.04033	14.6691
H3_Mono__MSD_28	H3mono	1.9567	15.6536	7.72505	22.581	34.7655
H3_Mono__MSD_30	H3mono	0.51211	4.09688	3.07667	7.57	16.2641
H3_Mono__MSD_36	H3mono	1.03816	8.30531	5.09655	14.4862	28.481
H3_Mono__MSD_38	H3mono	4.4502	35.6016	7.98174	18.6137	40.0991
H3_Mono__MSD_39	H3mono	0.0731125	0.5849	2.94556	5.10158	9.3359
H3_Mono__MSD_40	H3mono	0.589991	4.71993	3.57806	11.3746	14.956
H3_Mono__MSD_41	H3mono	1.0949	8.75918	9.88816	22.538	39.4247
H3_Mono__MSD_43	H3mono	5.51516	44.1213	10.8695	18.5649	41.7866
H3_Mono__MSD_44	H3mono	1.23807	9.90456	5.10045	10.961	29.8806
H3_Mono__MSD_45	H3mono	10.616	84.9283	8.72751	18.0653	57.2709
H3_Mono__MSD_46	H3mono	2.29381	18.3505	6.99841	12.4078	46.0578
H3_Mono__MSD_47	H3mono	4.25739	34.0591	7.3356	19.2168	42.2027
H3_Mono__MSD_48	H3mono	1.33967	10.7174	3.52214	7.62432	20.6315
H3_Mono__MSD_49	H3mono	3.72245	29.7796	9.75704	18.0308	30.3163
H3_Mono__MSD_51	H3mono	5.58891	44.7113	8.43601	20.0108	55.549
H3_Mono__MSD_55	H3mono	7.08784	56.7027	10.8553	22.9269	59.0441
H3_Mono__MSD_56	H3mono	9.01699	72.1359	14.3998	23.1899	66.6309
H3_Mono__MSD_60	H3mono	8.37424	66.9939	12.4169	23.3187	41.6992
H3_Mono__MSD_63	H3mono	23.6296	189.037	13.7276	23.1428	75.7066
H3_Mono__MSD_64	H3mono	0.502494	4.01995	7.06071	13.7263	19.8175
H3_Mono__MSD_67	H3mono	15.4258	123.406	11.4148	21.8268	80.3507
H3_Mono__MSD_68	H3mono	4.86964	38.9571	8.36442	18.4842	49.2235
H3_Mono__MSD_69	H3mono	4.30371	34.4297	6.02439	13.47	33.725
H3_Mono__MSD_71	H3mono	1.8319	14.6552	8.92898	19.5724	28.3742
H3_Mono__MSD_72	H3mono	8.12104	64.9683	9.82623	19.2373	51.0428
H3_Mono__MSD_74	H3mono	3.45436	27.6349	8.37341	20.422	43.4503
H3_Mono__MSD_77	H3mono	9.91585	79.3268	11.6474	22.1684	61.7947
H3_Mono__MSD_81	H3mono	10.6822	85.458	9.27787	20.8409	35.5703
H3_Mono__MSD_86	H3mono	4.92329	39.3863	8.35326	13.3574	32.9911
H3_Mono__MSD_92	H3mono	6.13427	49.0742	6.23581	21.7006	81.0506
H3_Mono__MSD_95	H3mono	9.50452	76.0362	10.6188	22.8746	67.3101
H3_Mono__MSD_96	H3mono	6.08706	48.6965	11.4755	23.0234	45.1122
H3_Mono__MSD_98	H3mono	20.1186	160.949	17.0736	20.9684	97.4045
H3_Mono__MSD_102	H3mono	3.02821	24.2257	10.9751	20.6046	31.7463
H3_Mono__MSD_103	H3mono	3.18139	25.4511	7.55248	17.4882	74.058
H3_Mono__MSD_116	H3mono	1.4036	11.2288	4.26481	10.6229	31.974
H3_Mono__MSD_117	H3mono	1.24095	9.92761	5.44501	14.4215	30.7365
H3_Mono__MSD_118	H3mono	0.657436	5.25949	4.38204	12.4458	35.3281
H3_Mono__MSD_120	H3mono	2.23034	17.8427	6.14386	13.331	32.7152
H3_Mono__MSD_121	H3mono	4.65726	37.2581	9.9193	19.3337	60.9339
H3_Mono__MSD_125	H3mono	0.530675	4.2454	3.68469	11.1229	18.4003
H3_Mono__MSD_126	H3mono	6.15297	49.2238	7.83532	23.0327	95.7119
H3_Mono__MSD_127	H3mono	0.14502	1.16016	3.18038	6.90435	14.278
H3_Mono__MSD_128	H3mono	2.19445	17.5556	10.6603	23.2435	58.1469
H3_Mono__MSD_129	H3mono	2.31234	18.4987	6.03629	18.5226	63.9197
H3_Mono__MSD_130	H3mono	5.49616	43.9693	7.19947	18.2068	67.4322
H3_Mono__MSD_131	H3mono	3.72445	29.7956	8.23575	21.6922	55.7677
H3_Mono__MSD_132	H3mono	7.33207	58.6566	9.00162	21.9896	104.068
H3_Mono__MSD_134	H3mono	7.24016	57.9213	7.66249	20.7483	36.0295
H3_Mono__MSD_135	H3mono	6.53706	52.2965	12.8094	18.7551	42.3724
H3_Mono__MSD_137	H3mono	1.7885	14.308	9.70859	19.2347	42.0971
H3_Mono__MSD_138	H3mono	2.22124	17.7699	8.57442	21.6874	95.804
H3_Mono__MSD_139	H3mono	12.1643	97.3143	10.765	21.9252	69.0418
H3_Mono__MSD_140	H3mono	1.49655	11.9724	4.17791	14.4798	39.123
H3_Mono__MSD_141	H3mono	4.385	35.08	6.5748	16.1055	57.5196
H3_Mono__MSD_143	H3mono	0.714579	5.71663	5.53172	12.4432	29.9624
H3_Mono__MSD_144	H3mono	1.21471	9.71768	6.06556	17.2911	28.5741
H3_Mono__MSD_146	H3mono	3.3774	27.0192	6.06382	14.5143	26.8536
H3_Mono__MSD_147	H3mono	6.67352	53.3882	7.5639	17.0658	53.4872
H3_Mono__MSD_148	H3mono	2.45522	19.6418	6.44569	19.8456	44.5136
H3_Mono__MSD_151	H3mono	2.01154	16.0923	8.57149	22.8459	73.5664
H3_Mono__MSD_153	H3mono	1.7996	14.3968	5.55719	13.0318	34.7294
H3_Mono__MSD_156	H3mono	3.62743	29.0194	10.2258	22.6252	48.0687
H3_Mono__MSD_158	H3mono	6.54582	52.3666	6.26188	20.0228	82.6929
H3_Mono__MSD_159	H3mono	2.18166	17.4533	6.56481	21.5313	50.6409
H3_Mono__MSD_160	H3mono	8.69352	69.5482	8.47582	22.9544	69.488
H3_Mono__MSD_161	H3mono	7.89796	63.1837	11.0992	20.1707	43.2304
H3_Mono__MSD_163	H3mono	4.30877	34.4702	9.43429	17.8925	74.7358
H3_Mono__MSD_164	H3mono	7.03774	56.3019	10.3678	20.766	41.0015
H3_Mono__MSD_166	H3mono	5.00143	40.0114	11.6877	19.228	58.3781
H3_Mono__MSD_167	H3mono	2.53624	20.2899	4.94887	12.5412	40.5
H3_Mono__MSD_170	H3mono	14.5404	116.323	9.39752	21.7602	52.6857
Low_Salt__MSD_1	Low_Salt	0.0873017	0.698414	1.6118	12.0665	15.4534
Low_Salt__MSD_3	Low_Salt	0.0643457	0.514766	2.45811	4.87728	12.5997
Low_Salt__MSD_4	Low_Salt	0.529467	4.23574	3.31282	6.55356	14.5761
Low_Salt__MSD_5	Low_Salt	0.156704	1.25363	1.95457	6.52677	9.33976
Low_Salt__MSD_7	Low_Salt	0.102702	0.821614	1.89042	9.65089	13.1616
Low_Salt__MSD_10	Low_Salt	0.400195	3.20156	2.69816	6.57213	13.9216
Low_Salt__MSD_12	Low_Salt	0.429646	3.43717	2.05922	6.18261	11.9147
Low_Salt__MSD_13	Low_Salt	1.43161	11.4529	3.84875	11.6627	28.4631
Low_Salt__MSD_15	Low_Salt	2.90948	23.2758	3.7295	16.6928	21.1313
Low_Salt__MSD_17	Low_Salt	1.36131	10.8905	2.86885	12.4088	26.2499
Low_Salt__MSD_18	Low_Salt	0.175691	1.40553	2.2616	7.3753	13.5106
Low_Salt__MSD_19	Low_Salt	0.273611	2.18889	2.00685	8.93769	17.0869
Low_Salt__MSD_20	Low_Salt	0.129451	1.03561	1.47563	4.0922	14.3308
Low_Salt__MSD_21	Low_Salt	0.718442	5.74754	1.83757	12.0305	27.5401
Low_Salt__MSD_22	Low_Salt	0.230364	1.84291	2.26849	11.8347	25.9864
Low_Salt__MSD_24	Low_Salt	0.167106	1.33685	3.84907	12.5076	17.7578
Low_Salt__MSD_25	Low_Salt	0.333816	2.67053	2.40361	11.3032	15.9523
Low_Salt__MSD_26	Low_Salt	0.323823	2.59058	2.86044	5.83851	11.8234
Low_Salt__MSD_27	Low_Salt	0.12587	1.00696	1.54817	5.43357	11.8769
Low_Salt__MSD_32	Low_Salt	0.177579	1.42063	1.60769	6.46418	14.374
Low_Salt__MSD_35	Low_Salt	1.27567	10.2054	3.63595	10.5361	22.0398
Low_Salt__MSD_36	Low_Salt	1.37557	11.0046	3.94993	14.4601	17.427
Low_Salt__MSD_38	Low_Salt	0.256794	2.05435	2.04798	9.91209	29.6317
Low_Salt__MSD_39	Low_Salt	1.3607	10.8856	3.50394	11.3208	43.6598
Low_Salt__MSD_42	Low_Salt	0.217606	1.74085	1.47477	2.25742	6.97264
Low_Salt__MSD_44	Low_Salt	4.05656	32.4525	7.66228	16.9539	28.9914
Low_Salt__MSD_45	Low_Salt	0.440866	3.52693	4.05669	12.377	15.0007
Low_Salt__MSD_49	Low_Salt	6.28279	50.2623	7.28903	23.9294	60.1907
Low_Salt__MSD_51	Low_Salt	0.0651071	0.520857	1.46649	5.46922	13.2734
Low_Salt__MSD_53	Low_Salt	0.127303	1.01842	2.58982	7.06999	11.7388
Low_Salt__MSD_54	Low_Salt	2.20766	17.6613	5.55267	22.0665	60.7536
Low_Salt__MSD_56	Low_Salt	1.57539	12.6031	2.1663	14.3178	21.2015
Low_Salt__MSD_58	Low_Salt	0.0691502	0.553202	1.54	6.35153	12.1412
Low_Salt__MSD_60	Low_Salt	0.0924719	0.739775	1.98913	6.69543	15.5093
Low_Salt__MSD_61	Low_Salt	1.7128	13.7024	3.25426	10.1055	41.385
Low_Salt__MSD_62	Low_Salt	0.546447	4.37158	2.6461	7.87664	11.9297
Low_Salt__MSD_64	Low_Salt	0.277562	2.2205	2.34194	6.82799	14.3272
Low_Salt__MSD_66	Low_Salt	0.120634	0.965072	1.74381	6.72386	17.4928
Low_Salt__MSD_67	Low_Salt	0.214143	1.71314	1.56139	7.8319	11.6323
Low_Salt__MSD_68	Low_Salt	0.15684	1.25472	2.33057	3.80893	6.83032
Low_Salt__MSD_69	Low_Salt	0.120162	0.961294	2.84331	14.1625	15.8708
Low_Salt__MSD_71	Low_Salt	0.074047	0.592376	1.16753	6.74138	16.5056
Low_Salt__MSD_72	Low_Salt	0.249749	1.99799	1.46061	4.62341	10.1393
Low_Salt__MSD_73	Low_Salt	0.298726	2.38981	2.61919	12.2081	20.5776
Low_Salt__MSD_74	Low_Salt	1.01104	8.08836	3.29883	7.17636	25.1405
Low_Salt__MSD_75	Low_Salt	0.733502	5.86802	1.82181	5.46855	19.1536
Low_Salt__MSD_76	Low_Salt	0.084735	0.67788	1.52577	8.62128	14.367
Low_Salt__MSD_77	Low_Salt	6.00049	48.0039	7.12306	15.8424	47.0598
Low_Salt__MSD_78	Low_Salt	0.0749214	0.599371	1.56642	6.54544	13.3555
Low_Salt__MSD_80	Low_Salt	0.330104	2.64083	1.93207	11.3661	28.8435
Low_Salt__MSD_82	Low_Salt	0.0749625	0.5997	1.03712	10.7907	12.3572
Low_Salt__MSD_83	Low_Salt	0.359229	2.87383	2.33041	7.5096	16.2735
Low_Salt__MSD_84	Low_Salt	0.77362	6.18896	3.90106	19.6985	28.2155
Low_Salt__MSD_85	Low_Salt	1.26205	10.0964	3.78613	13.1858	29.9635
Low_Salt__MSD_86	Low_Salt	0.255468	2.04374	3.3878	4.35137	9.17111
Low_Salt__MSD_88	Low_Salt	0.0999106	0.799285	2.7639	9.27934	14.8455
Low_Salt__MSD_89	Low_Salt	0.496003	3.96802	3.625	12.93	36.2442
Low_Salt__MSD_90	Low_Salt	1.6935	13.548	2.96264	20.7722	39.5545
Low_Salt__MSD_91	Low_Salt	0.650079	5.20063	5.53715	10.5997	38.6995
Low_Salt__MSD_92	Low_Salt	0.500498	4.00398	2.96052	8.86345	24.2876
Low_Salt__MSD_93	Low_Salt	0.0788404	0.630723	2.014	9.12319	12.0714
Low_Salt__MSD_95	Low_Salt	0.186566	1.49253	2.31236	10.6471	15.5331
Low_Salt__MSD_98	Low_Salt	0.339421	2.71537	1.74148	17.1184	20.4831
Low_Salt__MSD_99	Low_Salt	0.269666	2.15733	3.18606	15.5661	34.5955
Low_Salt__MSD_101	Low_Salt	1.74301	13.9441	2.48704	11.9794	18.644
Low_Salt__MSD_102	Low_Salt	0.578058	4.62446	2.13371	10.3786	15.8946
Low_Salt__MSD_103	Low_Salt	0.065412	0.523296	1.85652	9.90086	13.799
Low_Salt__MSD_105	Low_Salt	0.386175	3.0894	2.12435	8.63732	13.3743
Low_Salt__MSD_106	Low_Salt	0.0665914	0.532731	1.79811	6.83851	10.6666
Low_Salt__MSD_110	Low_Salt	0.108407	0.867258	1.69375	11.5008	14.8136
Low_Salt__MSD_113	Low_Salt	0.312781	2.50225	2.27341	10.5034	16.6129
Low_Salt__MSD_116	Low_Salt	0.828	6.624	4.43067	16.3435	45.4258
Low_Salt__MSD_117	Low_Salt	0.276084	2.20867	2.50703	6.88766	10.754
Low_Salt__MSD_118	Low_Salt	2.95898	23.6718	7.35324	18.4683	18.6498
Low_Salt__MSD_127	Low_Salt	2.05972	16.4778	3.25125	11.4208	18.9975
Low_Salt__MSD_130	Low_Salt	0.137486	1.09989	1.48491	4.26533	6.22496
Low_Salt__MSD_134	Low_Salt	0.212761	1.70209	2.26518	5.93212	14.0839
Low_Salt__MSD_138	Low_Salt	0.389908	3.11926	4.27289	9.05333	17.7535
Low_Salt__MSD_141	Low_Salt	0.401232	3.20986	2.50675	8.61035	13.6882
Low_Salt__MSD_143	Low_Salt	0.471794	3.77435	3.67287	17.4313	27.5144
Low_Salt__MSD_149	Low_Salt	0.586406	4.69125	3.27977	12.7067	20.4829
Low_Salt__MSD_150	Low_Salt	0.395841	3.16673	3.57009	11.323	23.0166
Low_Salt__MSD_151	Low_Salt	0.326451	2.61161	3.73175	13.0177	23.3465
Low_Salt__MSD_155	Low_Salt	0.0882129	0.705703	2.32243	8.36661	16.4962
Low_Salt__MSD_158	Low_Salt	0.110875	0.886998	1.40438	7.25121	15.4209
Low_Salt__MSD_159	Low_Salt	0.0636944	0.509555	1.90198	5.69622	9.27003
Low_Salt__MSD_160	Low_Salt	0.698855	5.59084	3.00354	10.1554	13.8818
Low_Salt__MSD_162	Low_Salt	0.318717	2.54974	3.33204	7.76905	20.0447
Low_Salt__MSD_163	Low_Salt	0.080891	0.647128	1.40543	3.38739	4.47883
Low_Salt__MSD_164	Low_Salt	0.106964	0.855711	2.38332	5.97947	9.2061
Low_Salt__MSD_165	Low_Salt	1.55089	12.4071	6.38225	15.9639	16.4136
Low_Salt__MSD_167	Low_Salt	0.94609	7.56872	3.29705	13.5513	14.1942
Low_Salt__MSD_168	Low_Salt	0.152935	1.22348	1.35367	6.90239	12.4741
Low_Salt__MSD_171	Low_Salt	0.271306	2.17045	3.96294	14.4704	25.0543
Low_Salt__MSD_173	Low_Salt	0.193952	1.55162	1.71801	4.47309	6.08517
Low_Salt__MSD_178	Low_Salt	0.081972	0.655776	1.70614	5.59946	10.062
Low_Salt__MSD_181	Low_Salt	0.0808092	0.646474	2.26272	6.51493	12.009
Low_Salt__MSD_185	Low_Salt	0.0841616	0.673293	1.83888	4.21517	7.22276
Low_Salt__MSD_187	Low_Salt	0.0970532	0.776426	1.56219	2.70676	6.00947
Low_Salt__MSD_188	Low_Salt	0.179326	1.43461	3.88531	8.62566	13.2349
Low_Salt__MSD_189	Low_Salt	0.297636	2.38109	2.21035	8.37189	18.2027
Low_Salt__MSD_191	Low_Salt	0.32441	2.59528	2.9115	9.54607	11.5008
Low_Salt__MSD_200	Low_Salt	0.0684986	0.547989	1.73757	5.49249	9.52282
Low_Salt__MSD_202	Low_Salt	0.377194	3.01755	2.71934	17.9909	35.7804
Low_Salt__MSD_203	Low_Salt	0.476605	3.81284	3.62327	11.5762	16.0814
Low_Salt__MSD_212	Low_Salt	0.0818828	0.655062	1.85654	8.17365	15.0031
Low_Salt__MSD_219	Low_Salt	0.327045	2.61636	3.23254	13.6998	22.195
Low_Salt__MSD_221	Low_Salt	0.0986131	0.788905	2.64404	6.2776	9.4685
Low_Salt__MSD_225	Low_Salt	0.0927594	0.742075	1.80057	3.57842	6.9778
Low_Salt__MSD_226	Low_Salt	0.0636549	0.509239	1.78856	3.01048	7.03965
Low_Salt__MSD_227	Low_Salt	0.44938	3.59504	3.80205	11.1216	20.8635
Low_Salt__MSD_234	Low_Salt	0.371589	2.97271	3.57621	11.8302	22.2436
Low_Salt__MSD_238	Low_Salt	0.118342	0.946737	1.90926	5.52287	9.27153
Low_Salt__MSD_239	Low_Salt	0.361389	2.89111	3.22025	12.202	18.0596
Low_Salt__MSD_245	Low_Salt	1.86234	14.8987	4.88373	13.3782	36.0455
Low_Salt__MSD_246	Low_Salt	0.129006	1.03205	1.35322	5.17675	7.6744
Low_Salt__MSD_247	Low_Salt	0.249019	1.99215	2.01176	7.93729	9.54238
Low_Salt__MSD_250	Low_Salt	0.138777	1.11022	1.83215	6.70886	15.2614
Low_Salt__MSD_251	Low_Salt	0.237772	1.90218	3.01903	6.89814	15.1051
Low_Salt__MSD_253	Low_Salt	0.26922	2.15376	2.30886	5.58229	10.014
Low_Salt__MSD_254	Low_Salt	1.02842	8.22734	4.93717	12.1203	14.4746
Low_Salt__MSD_258	Low_Salt	0.245298	1.96238	3.38332	11.8518	18.7833
Low_Salt__MSD_260	Low_Salt	0.360455	2.88364	1.89608	3.9675	7.88011
Low_Salt__MSD_263	Low_Salt	0.426627	3.41302	2.86477	7.67917	17.3447
NoAPS__MSD_0	No_APS	0.26049	2.08392	2.98817	8.66991	35.5394
NoAPS__MSD_1	No_APS	1.9616	15.6928	7.80768	22.3118	39.6006
NoAPS__MSD_2	No_APS	7.88943	63.1154	7.71474	15.6447	32.2294
NoAPS__MSD_3	No_APS	0.953116	7.62493	4.03532	11.4376	45.8675
NoAPS__MSD_4	No_APS	2.07176	16.5741	7.3343	14.2409	23.8404
NoAPS__MSD_5	No_APS	1.6486	13.1888	5.87682	14.7082	26.405
NoAPS__MSD_6	No_APS	5.42732	43.4186	7.88498	20.3678	121.822
NoAPS__MSD_7	No_APS	0.953028	7.62422	7.37816	21.1515	52.0391
NoAPS__MSD_8	No_APS	11.6629	93.3029	9.69625	22.0878	53.0486
NoAPS__MSD_9	No_APS	4.88854	39.1083	9.23314	17.8877	58.7892
NoAPS__MSD_10	No_APS	10.0313	80.2501	13.798	23.5441	59.4456
NoAPS__MSD_11	No_APS	0.400141	3.20113	2.47697	7.03854	24.7318
NoAPS__MSD_12	No_APS	0.0816395	0.653116	1.83538	6.20743	19.104
NoAPS__MSD_14	No_APS	5.95405	47.6324	8.74275	19.3235	50.1315
NoAPS__MSD_15	No_APS	1.45364	11.6291	7.95782	19.3218	47.2927
NoAPS__MSD_16	No_APS	5.81998	46.5598	8.06762	22.716	49.3382
NoAPS__MSD_17	No_APS	2.52369	20.1895	6.7152	18.1449	48.2049
NoAPS__MSD_18	No_APS	1.2706	10.1648	3.14955	19.3524	45.0343
NoAPS__MSD_19	No_APS	9.7554	78.0432	8.17652	23.9901	94.4716
NoAPS__MSD_21	No_APS	0.230504	1.84403	2.03339	12.1798	15.7272
NoAPS__MSD_22	No_APS	12.3904	99.1236	9.96756	18.553	40.0737
NoAPS__MSD_23	No_APS	2.7456	21.9648	6.22831	20.4592	57.4193
NoAPS__MSD_24	No_APS	0.214639	1.71711	5.21382	21.1783	40.1617
NoAPS__MSD_25	No_APS	4.34156	34.7325	6.33138	18.3006	61.9579
NoAPS__MSD_26	No_APS	0.249856	1.99885	3.39055	5.96708	12.533
NoAPS__MSD_27	No_APS	1.51903	12.1522	4.95938	18.0174	44.2151
NoAPS__MSD_28	No_APS	0.933577	7.46862	6.34789	18.8121	40.6877
NoAPS__MSD_29	No_APS	0.415466	3.32373	4.90096	13.8891	23.2429
NoAPS__MSD_30	No_APS	4.54204	36.3363	7.76086	22.9251	54.9497
NoAPS__MSD_31	No_APS	7.58671	60.6937	10.0681	20.4417	29.9786
NoAPS__MSD_32	No_APS	2.45631	19.6505	4.65272	23.8436	40.188
NoAPS__MSD_33	No_APS	0.424625	3.397	3.99508	7.66678	20.1354
NoAPS__MSD_34	No_APS	4.1028	32.8224	7.0102	19.0651	38.5818
NoAPS__MSD_35	No_APS	5.40866	43.2693	8.20009	17.842	68.083
NoAPS__MSD_36	No_APS	0.615043	4.92034	4.57098	22.144	31.2655
NoAPS__MSD_37	No_APS	2.62165	20.9732	7.90097	13.3856	35.5197
NoAPS__MSD_38	No_APS	10.0337	80.2699	12.9336	23.9091	79.9927
NoAPS__MSD_39	No_APS	3.71506	29.7205	8.63347	15.5176	82.2114
NoAPS__MSD_40	No_APS	2.20055	17.6044	5.54898	13.8113	26.558
NoAPS__MSD_41	No_APS	7.83369	62.6695	9.32601	23.4771	94.6929
NoAPS__MSD_42	No_APS	6.07865	48.6292	6.87964	21.677	75.5949
NoAPS__MSD_43	No_APS	0.651813	5.2145	3.57304	9.96539	22.2645
NoAPS__MSD_44	No_APS	5.37247	42.9798	6.81596	19.053	66.5721
NoAPS__MSD_45	No_APS	2.59013	20.721	5.69969	12.1616	31.6333
NoAPS__MSD_46	No_APS	0.201486	1.61189	4.24475	13.0667	17.3509
NoAPS__MSD_47	No_APS	5.70986	45.6789	7.99179	14.7786	51.55
NoAPS__MSD_49	No_APS	0.213147	1.70518	4.60162	8.38625	11.4058
NoAPS__MSD_50	No_APS	1.6737	13.3896	3.09296	13.6308	32.5528
NoAPS__MSD_51	No_APS	4.3422	34.7376	9.11195	22.2693	35.8178
NoAPS__MSD_52	No_APS	6.53621	52.2897	10.2062	21.3593	79.5962
NoAPS__MSD_53	No_APS	2.00249	16.0199	4.05951	13.0944	28.4394
NoAPS__MSD_54	No_APS	0.860529	6.88423	3.90159	15.0081	25.2237
NoAPS__MSD_55	No_APS	10.7709	86.167	9.0963	15.9492	66.1621
NoAPS__MSD_56	No_APS	3.64988	29.199	5.56661	14.8352	34.5134
NoAPS__MSD_57	No_APS	7.16148	57.2918	8.43437	18.3832	79.7523
NoAPS__MSD_58	No_APS	1.63355	13.0684	4.6006	11.4677	34.2271
NoAPS__MSD_59	No_APS	4.48269	35.8615	11.5662	22.3846	40.6958
NoAPS__MSD_60	No_APS	0.17098	1.36784	2.14376	4.35123	11.5423
NoAPS__MSD_61	No_APS	5.05488	40.439	5.7391	19.6679	68.1083
NoAPS__MSD_62	No_APS	0.119704	0.957635	1.91832	7.06932	19.8299
NoAPS__MSD_63	No_APS	1.6661	13.3288	5.31455	12.6008	18.7067
NoAPS__MSD_64	No_APS	0.329726	2.63781	3.08557	15.3554	19.2529
NoAPS__MSD_65	No_APS	2.3904	19.1232	11.2762	20.2399	52.811
NoAPS__MSD_66	No_APS	9.33884	74.7107	9.33691	19.4765	80.7382
NoAPS__MSD_67	No_APS	7.27761	58.2209	10.2316	22.6064	47.6998
NoAPS__MSD_68	No_APS	10.6673	85.3382	8.30012	23.8748	42.1386
NoAPS__MSD_70	No_APS	1.2507	10.0056	6.80461	23.3957	32.1206
NoAPS__MSD_71	No_APS	3.73999	29.9199	6.06059	15.113	29.3904
NoAPS__MSD_72	No_APS	0.172029	1.37623	4.2277	8.34769	14.1827
NoAPS__MSD_73	No_APS	0.26698	2.13584	3.5045	6.09981	12.6642
NoAPS__MSD_74	No_APS	1.24996	9.99967	5.18777	21.2499	45.2347
NoAPS__MSD_75	No_APS	0.354534	2.83627	3.2232	8.19486	11.5748
NoAPS__MSD_76	No_APS	1.06347	8.50777	3.24226	6.69623	15.1641
NoAPS__MSD_77	No_APS	5.96725	47.738	7.66133	16.4096	63.5368
NoAPS__MSD_79	No_APS	7.0511	56.4088	10.5247	22.8304	47.1415
NoAPS__MSD_80	No_APS	1.42881	11.4305	3.48265	12.6998	39.2907
NoAPS__MSD_81	No_APS	0.638065	5.10452	4.06548	8.61202	11.3937
NoAPS__MSD_82	No_APS	6.92772	55.4218	8.33794	17.8191	90.7832
NoAPS__MSD_83	No_APS	0.181365	1.45092	2.22051	6.78432	8.41483
NoAPS__MSD_84	No_APS	0.214363	1.7149	3.10505	12.5908	26.6225
NoAPS__MSD_85	No_APS	0.206965	1.65572	1.70767	12.4325	16.5098
NoAPS__MSD_86	No_APS	9.84463	78.757	11.1284	21.6465	89.4888
NoAPS__MSD_87	No_APS	1.09044	8.72354	5.03342	10.2822	26.4028
NoAPS__MSD_88	No_APS	1.52716	12.2173	4.26356	15.9098	39.14
NoAPS__MSD_89	No_APS	0.672545	5.38036	4.54493	14.4336	16.1325
NoAPS__MSD_90	No_APS	0.726606	5.81285	1.92962	10.1207	14.5131
NoAPS__MSD_91	No_APS	1.80426	14.4341	4.71037	15.0991	43.682
NoAPS__MSD_92	No_APS	4.28235	34.2588	9.02551	19.8847	52.4453
NoAPS__MSD_94	No_APS	7.85284	62.8227	11.5602	23.8154	61.9989
NoAPS__MSD_95	No_APS	6.9081	55.2648	11.1971	21.2946	85.4796
NoAPS__MSD_96	No_APS	5.10771	40.8617	9.70814	18.6103	36.0985
NoAPS__MSD_98	No_APS	5.8293	46.6344	7.41794	13.4419	35.6227
NoAPS__MSD_99	No_APS	11.0881	88.7049	8.48296	22.3467	55.5717
NoAPS__MSD_100	No_APS	0.256684	2.05347	3.11248	9.51585	24.0815
NoAPS__MSD_101	No_APS	0.211006	1.68805	2.44881	8.15204	24.6581
NoAPS__MSD_102	No_APS	0.181095	1.44876	2.84657	14.2584	27.7785
NoAPS__MSD_103	No_APS	2.87821	23.0257	4.56785	22.6543	73.6639
NoAPS__MSD_104	No_APS	3.49199	27.9359	8.85628	15.9884	37.4577
NoAPS__MSD_105	No_APS	3.94084	31.5267	5.82773	16.2495	72.5889
NoAPS__MSD_106	No_APS	6.83751	54.7001	10.0691	21.1874	112.503
NoAPS__MSD_107	No_APS	0.402614	3.22091	2.63816	10.6942	35.9929
NoAPS__MSD_108	No_APS	0.686681	5.49345	4.54295	16.8151	22.637
NoAPS__MSD_109	No_APS	0.37625	3.01	4.39154	8.97605	21.3494
NoAPS__MSD_110	No_APS	0.400845	3.20676	2.74699	6.8175	15.854
NoAPS__MSD_111	No_APS	0.51358	4.10864	2.82483	9.44088	29.3805
NoAPS__MSD_112	No_APS	1.6747	13.3976	5.4745	18.676	41.3403
NoAPS__MSD_113	No_APS	0.361539	2.89231	3.39615	8.89153	16.3479
NoAPS__MSD_115	No_APS	5.00695	40.0556	7.56681	22.7869	111.795
NoAPS__MSD_116	No_APS	3.26582	26.1266	7.64914	16.2765	68.3455
NoAPS__MSD_117	No_APS	0.63638	5.09104	3.23942	8.74266	24.3613
NoAPS__MSD_118	No_APS	6.6059	52.8472	13.0892	23.1052	45.4215
NoAPS__MSD_119	No_APS	14.5669	116.535	11.1243	22.4126	53.2926
NoAPS__MSD_120	No_APS	0.180358	1.44286	2.67486	7.07758	15.3867
NoAPS__MSD_122	No_APS	3.45872	27.6698	8.01179	15.9428	46.9322
NoAPS__MSD_123	No_APS	2.0717	16.5736	4.81982	20.8351	47.1471
NoAPS__MSD_124	No_APS	6.0515	48.412	10.4806	20.8173	62.2979
NoAPS__MSD_125	No_APS	1.07156	8.57249	4.30624	18.8991	55.637
NoAPS__MSD_126	No_APS	1.21784	9.74275	4.46475	19.6141	43.0329
NoAPS__MSD_127	No_APS	1.74534	13.9627	4.11342	11.0205	26.6245
NoAPS__MSD_128	No_APS	3.61868	28.9494	5.55206	17.8483	110.335
NoAPS__MSD_130	No_APS	0.100652	0.805215	1.38219	3.17067	23.0065
NoAPS__MSD_131	No_APS	1.29214	10.3371	3.78368	13.8497	71.5496
NoAPS__MSD_132	No_APS	1.04418	8.35342	6.1297	17.6571	35.3925
NoAPS__MSD_133	No_APS	12.3007	98.4057	13.214	20.5223	92.7767
NoAPS__MSD_134	No_APS	6.2277	49.8216	8.37824	19.5612	41.0971
NoAPS__MSD_135	No_APS	9.03256	72.2605	8.0208	21.3659	98.2026
NoAPS__MSD_136	No_APS	0.561745	4.49396	3.91612	9.51398	25.4213
NoAPS__MSD_137	No_APS	0.10648	0.851841	4.5889	13.9271	22.0222
NoAPS__MSD_138	No_APS	0.222079	1.77663	3.08643	6.95643	14.2923
NoAPS__MSD_140	No_APS	5.23412	41.873	6.50438	19.3127	43.3987
NoAPS__MSD_141	No_APS	1.8	14.4	3.952	19.7128	38.2044
NoAPS__MSD_142	No_APS	4.20432	33.6346	5.98234	22.8788	67.0542
NoAPS__MSD_143	No_APS	10.2297	81.8373	9.8938	23.5709	111.183
NoAPS__MSD_144	No_APS	23.2527	186.022	14.1594	22.7504	101.503
NoAPS__MSD_145	No_APS	4.15026	33.2021	9.80505	20.3616	74.1842
NoAPS__MSD_146	No_APS	3.19035	25.5228	8.67162	23.6971	57.3657
NoAPS__MSD_147	No_APS	6.76537	54.123	7.98398	21.2396	67.5436
NoAPS__MSD_148	No_APS	5.21098	41.6878	10.218	19.7636	58.2354
NoAPS__MSD_150	No_APS	0.0826874	0.661499	2.87112	6.75961	9.47445
NoAPS__MSD_151	No_APS	2.97248	23.7798	7.57942	23.4561	42.2889
NoAPS__MSD_152	No_APS	0.42037	3.36296	2.10458	4.10005	10.4907
NoAPS__MSD_153	No_APS	1.16353	9.30826	5.39502	21.7067	45.404
NoAPS__MSD_154	No_APS	2.15932	17.2746	4.75593	22.5084	59.0398
NoAPS__MSD_155	No_APS	0.202728	1.62182	2.87564	7.27842	10.5491
NoAPS__MSD_157	No_APS	10.0108	80.0868	10.1343	22.8984	43.1771
NoAPS__MSD_158	No_APS	8.6753	69.4024	9.54662	15.9921	64.5769
NoAPS__MSD_159	No_APS	2.23445	17.8756	3.43352	11.6983	56.8047
NoAPS__MSD_160	No_APS	0.24258	1.94064	2.88284	5.53062	19.2474
NoAPS__MSD_161	No_APS	1.54828	12.3862	4.22944	13.6287	30.117
NoAPS__MSD_162	No_APS	3.75047	30.0038	8.80366	18.6624	51.5273
NoAPS__MSD_163	No_APS	10.5563	84.4506	9.40997	16.9906	56.1183
NoAPS__MSD_165	No_APS	2.70424	21.6339	4.91146	21.2489	57.2495
NoAPS__MSD_166	No_APS	8.68329	69.4663	8.57186	23.5172	80.9612
NoAPS__MSD_167	No_APS	5.41903	43.3522	6.85034	18.349	35.1529
NoAPS__MSD_168	No_APS	2.49884	19.9907	4.48766	17.9241	47.3816
NoAPS__MSD_169	No_APS	8.97825	71.826	10.3019	21.8709	44.2401
NoAPS__MSD_170	No_APS	3.02226	24.1781	4.83902	18.0858	95.946
NoAPS__MSD_171	No_APS	13.698	109.584	10.8375	23.6575	67.6244
NoAPS__MSD_172	No_APS	7.30715	58.4572	10.4545	22.9088	56.0433
NoAPS__MSD_173	No_APS	12.1386	97.1084	12.2835	22.0887	68.9836
NoAPS__MSD_174	No_APS	0.343145	2.74516	2.57024	12.2998	26.731
NoAPS__MSD_175	No_APS	7.09227	56.7382	14.9774	23.9067	52.8983
NoAPS__MSD_176	No_APS	14.5678	116.542	14.0271	21.3045	75.2366
NoAPS__MSD_177	No_APS	6.78655	54.2924	9.81238	22.6802	57.5591
NoAPS__MSD_178	No_APS	1.80715	14.4572	6.49465	16.5187	26.1639
NoAPS__MSD_179	No_APS	25.8394	206.715	12.2186	22.0646	63.4032
NoAPS__MSD_180	No_APS	7.32693	58.6154	8.73758	14.9601	31.1925
NoAPS__MSD_182	No_APS	0.0805519	0.644415	1.24808	3.13135	7.47387
NoAPS__MSD_183	No_APS	0.84022	6.72176	2.6966	8.84248	27.2311
NoAPS__MSD_185	No_APS	4.3755	35.004	9.03942	17.1575	39.2207
NoAPS__MSD_186	No_APS	0.194339	1.55471	2.04769	6.42684	21.5458
NoAPS__MSD_187	No_APS	3.28111	26.2489	5.53112	19.0828	73.393
NoAPS__MSD_188	No_APS	3.37396	26.9917	8.3956	21.2664	38.7914
NoAPS__MSD_189	No_APS	4.98337	39.867	6.55088	14.6312	46.7003
NoAPS__MSD_190	No_APS	1.19159	9.53276	4.66558	10.9921	32.5218
NoAPS__MSD_192	No_APS	7.48599	59.8879	7.83379	22.6682	51.9056
NoAPS__MSD_193	No_APS	0.921886	7.37509	4.41882	10.1938	19.0799
NoAPS__MSD_195	No_APS	1.1294	9.03522	4.93241	17.6137	36.4719
NoAPS__MSD_196	No_APS	0.153545	1.22836	2.59555	12.7596	19.0368
NoAPS__MSD_197	No_APS	6.48524	51.8819	10.0354	22.7612	63.6019
NoAPS__MSD_198	No_APS	3.57859	28.6287	6.85502	18.5523	48.4205
NoAPS__MSD_199	No_APS	7.92039	63.3631	11.1532	22.2132	50.7986
NoAPS__MSD_200	No_APS	4.50194	36.0155	8.86705	22.5948	30.7378
NoAPS__MSD_201	No_APS	2.94515	23.5612	6.24538	16.6433	38.9377
NoAPS__MSD_202	No_APS	2.05955	16.4764	5.76649	12.3481	32.1699
NoAPS__MSD_203	No_APS	1.69407	13.5526	6.12238	12.5802	30.2562
NoAPS__MSD_204	No_APS	1.29874	10.3899	5.85654	10.8714	16.1181
NoAPS__MSD_205	No_APS	0.233769	1.87015	3.25033	7.37258	16.6631
NoAPS__MSD_206	No_APS	0.49131	3.93048	4.00568	7.75483	10.5347
NoAPS__MSD_207	No_APS	3.805	30.44	6.82682	10.6318	17.3484
NoAPS__MSD_208	No_APS	1.78591	14.2873	11.1374	20.8634	41.0311
NoAPS__MSD_209	No_APS	3.23552	25.8842	13.387	18.7191	67.6637
NoAPS__MSD_210	No_APS	10.0937	80.7496	9.71334	15.4504	62.884
NoAPS__MSD_211	No_APS	0.724895	5.79916	3.5173	15.7515	42.4505
NoAPS__MSD_212	No_APS	0.616152	4.92922	4.70675	8.71364	15.4914
NoAPS__MSD_213	No_APS	2.71614	21.7291	6.73111	20.114	24.941
NoAPS__MSD_214	No_APS	4.17785	33.4228	6.73025	12.5472	24.7953
NoAPS__MSD_215	No_APS	0.98485	7.8788	4.52373	9.36695	14.5025
NoAPS__MSD_216	No_APS	10.0764	80.6114	9.03174	20.1167	37.4315
NoAPS__MSD_217	No_APS	2.74728	21.9782	8.13156	13.3147	25.4355
NoAPS__MSD_218	No_APS	5.50795	44.0636	5.7403	22.5941	34.6652
NoAPS__MSD_219	No_APS	0.103381	0.827047	1.30532	3.85	6.91017
NoAPS__MSD_221	No_APS	0.286865	2.29492	1.9364	4.37537	8.09993
NoAPS__MSD_222	No_APS	0.498605	3.98884	5.77577	13.0079	18.8669
NoAPS__MSD_223	No_APS	0.682346	5.45877	2.85811	8.03864	16.9367
NoAPS__MSD_224	No_APS	0.137351	1.09881	1.36051	7.60713	22.2402
NoAPS__MSD_225	No_APS	0.6725	5.38	2.08356	9.37048	11.4298
NoAPS__MSD_226	No_APS	9.42987	75.439	10.9078	22.449	51.1782
NoAPS__MSD_227	No_APS	1.80818	14.4654	5.25042	19.1829	29.4833
NoAPS__MSD_228	No_APS	0.23224	1.85792	2.62326	5.02987	10.8296
NoAPS__MSD_230	No_APS	5.73309	45.8647	7.7354	18.6651	28.9115
NoAPS__MSD_231	No_APS	2.29111	18.3289	4.60096	17.0143	48.4115
NoAPS__MSD_232	No_APS	0.107027	0.856215	1.80853	8.68435	23.3251
NoAPS__MSD_233	No_APS	0.0854151	0.683321	1.21981	10.2819	20.1031
NoAPS__MSD_235	No_APS	1.91866	15.3493	6.72608	18.2877	41.3265
NoAPS__MSD_236	No_APS	0.144246	1.15397	2.34105	6.62086	24.6104
NoAPS__MSD_237	No_APS	2.84199	22.7359	8.40824	14.8361	39.1986
NoAPS__MSD_239	No_APS	1.79965	14.3972	5.22582	12.154	20.0602
NoAPS__MSD_240	No_APS	4.8249	38.5992	8.10155	16.0332	43.3821
NoAPS__MSD_241	No_APS	4.80966	38.4773	6.3274	18.3376	97.7871
NoAPS__MSD_242	No_APS	4.1596	33.2768	7.83392	15.609	38.6204
NoAPS__MSD_243	No_APS	0.261983	2.09586	2.91612	8.40059	22.0285
NoAPS__MSD_245	No_APS	13.4121	107.297	10.642	23.6596	151.276
NoAPS__MSD_247	No_APS	1.24537	9.96292	7.37655	20.8023	42.7244
NoAPS__MSD_248	No_APS	11.1602	89.2819	11.3141	23.6633	50.4403
NoAPS__MSD_249	No_APS	9.94226	79.5381	12.9253	18.1207	72.9434
NoAPS__MSD_250	No_APS	0.186666	1.49333	2.22323	6.64807	16.2564
NoAPS__MSD_251	No_APS	1.04703	8.37624	3.97646	9.81388	32.0912
NoAPS__MSD_252	No_APS	5.72591	45.8073	8.29221	22.865	54.7419
NoAPS__MSD_253	No_APS	0.7656	6.1248	4.25545	19.4156	35.7167
NoAPS__MSD_254	No_APS	1.53385	12.2708	7.48505	20.9819	64.8483
NoAPS__MSD_255	No_APS	6.90839	55.2671	6.59407	16.4262	93.7234
NoAPS__MSD_256	No_APS	1.26534	10.1227	5.35567	11.3126	14.6093
NoAPS__MSD_257	No_APS	1.58709	12.6967	3.36107	19.7699	50.5532
NoAPS__MSD_258	No_APS	0.0690402	0.552322	2.97826	8.06566	19.4725
NoAPS__MSD_259	No_APS	2.4958	19.9664	4.50667	18.799	39.2898
NoAPS__MSD_260	No_APS	9.08071	72.6457	11.9486	21.427	50.4041
NoAPS__MSD_261	No_APS	0.584342	4.67474	2.87171	9.06013	32.3099
[truncated: 1,837 more rows]
