# Supplementary material for: Single molecule analysis of CENP-A chromatin by high-speed atomic force microscopy
Source: eLife journal article supplement (doi:10.7554/elife.86709), 2023-09-01
Supplement: fig3-figsupp5-data1 [file Source_data_5.xlsx]

## Sheet: Sheet1
Source data 5 - Diffusion constants and F test results for Supplemental Figures 9
Conditions	Stuck_X_Step_DiffConst	Stuck_X_Step_DiffConst_SE	Stuck_Y_Step_DiffConst	Stuck_Y_Step_DiffConst_SE	D1_X_DiffConst	D1_X_DiffConst_SE	D1_Y_DiffConst	D1_Y_DiffConst_SE	F-test_stuck_vs_D1_X	F-test_stuck_vs_D1_Y
Low_Salt	0.0941478	0.0056365	0.123763	0.00730312	0.143786	0.0184006	0.194029	0.0229562	0.0925246	0.0797694
High_Salt	0.059489	0.00602083	0.0818247	0.00804978	0.23031	0.0370925	0.296153	0.0465507	2.00551e-05	4.52122e-05
No_Aps	0.00707185	0.00644314	0.0374772	0.0278892	0.14676	0.0195464	0.196129	0.0212989	1.11e-16	3.82374e-07
APS2X	0.0807482	0.00135813	0.0648711	0.00105409	0.0890456	0.00824329	0.054849	0.00692481	0.379688	0.700873
Tween	0.0937237	0.00877118	0.0713057	0.00675593	0.245785	0.0184795	0.171976	0.0160254	0.00147212	0.00322909
H3	0.0029792	0.000316738	0.00259276	0.000267972	0.168506	0.0336859	0.0786089	0.0401079	1.11e-16	1.11e-16
H3_H1	0.00455904	0.00035928	0.00343385	0.000254809	0.124927	0.0117921	0.0599007	0.00649203	1.11e-16	1.11e-15
H3_Mono	0	0	0	0	0.645205	0.233466	0.568572	2.21764	0	0
CpA	0.0994897	0.00868622	0.125056	0.0122025	0.231033	0.0124186	0.55397	0.0427336	0.00452748	3.63572e-06
CpA_2xCpC	0.0960397	0.00233052	0.13217	0.00322621	0.28615	0.0157486	0.278184	0.0179274	0.000402789	0.010401
