# Supplementary material for: Single molecule analysis of CENP-A chromatin by high-speed atomic force microscopy
Source: eLife journal article supplement (doi:10.7554/elife.86709), 2023-09-01
Supplement: fig5-data1 [file Source_Data_8.xlsx]

## Sheet: Sheet1
Source data 8: Quantification of RT-PCR of alpha-satellite transcripts for Figure 5C
Sample	Primer	Reporter	Ct
CpC OE	a-sat	SYBR	22.0612
CpC OE	a-sat	SYBR	21.982
CpC OE	a-sat	SYBR	21.5669
CpC OE	GAPDH	SYBR	30.156
CpC OE	GAPDH	SYBR	29.0094
CpC OE	GAPDH	SYBR	29.3827
mock	a-sat	SYBR	20.0775
mock	a-sat	SYBR	20.4434
mock	a-sat	SYBR	20.0718
mock	GAPDH	SYBR	26.1451
mock	GAPDH	SYBR	26.088
mock	GAPDH	SYBR	26.9186
