# Supplementary material for: Single molecule analysis of CENP-A chromatin by high-speed atomic force microscopy
Source: eLife journal article supplement (doi:10.7554/elife.86709), 2023-09-01
Supplement: fig5-figsupp1-data2 [file Source_Data_7.xlsx]

## Sheet: Sheet1
Source data 5: Quantification of ChIP-western blot from Figures 5A,B
RNAP2
	WT					CENP-C overexpr
	Input	CENP-C	ACA			Input	CENP-C	ACA
Exp1	5.92	26.8	17.5		Exp1	6.52	9.12	8.76
Exp2	7.76	14.1	12.6		Exp2	9.36	7.5	10.8
Exp3	7.34	24.9	17.8		Exp3	6.31	8.07	7.67		WT/OE
										CENP-C	ACA
		4.52703	2.95608				1.39877	1.34356	T.test	0.0304797	0.0242932
		1.81701	1.62371				0.801282	1.15385
		3.39237	2.42507				1.27892	1.21553
	mean	3.24547	2.33495			mean	1.15966	1.23765
	StDev	1.36097	0.67074			StDev	0.316096	0.0967701
CENP-A
	WT					CENP-C overexpr
	Input	CENP-C	ACA			Input	CENP-C	ACA
Exp1	0.98	8.63	13.2		Exp1	1.97	6.74	8.53
Exp2	0.57	10	11.4		Exp2	0.56	8.7	2.18
Exp3	0.38	1.71	2.23		Exp3	0.52	1.6	2.02		WT/OE
										CENP-C	ACA
		8.80612	13.4694				3.42132	4.32995	T.test	0.314133	0.0452333
		17.5439	20				15.5357	3.89286
		4.5	5.86842				3.07692	3.88462
	mean	10.2833	13.1126			mean	7.34465	4.03581
	StDev	6.64621	7.07254			StDev	7.09576	0.254768
CENP-C OE
	WT					CENP-C overexpr
		CENP-C					CENP-C
Exp1		1480			Exp1		4130		2.79054
Exp2		4220			Exp2		12200		2.891
Exp3		2340			Exp3		5140		2.19658
Exp4		637			Exp4		2066		3.24333
									2.78036
