# Supplementary material for: Single molecule analysis of CENP-A chromatin by high-speed atomic force microscopy
Source: eLife journal article supplement (doi:10.7554/elife.86709), 2023-09-01
Supplement: fig6-figsupp1-data1 [file Source_Data_9.xlsx]

## Sheet: Quench_pulse_chase___
Image	ROI	ImageROI	Sample	CpA_green_channel	TMR-Star_red_channel	TMR-Star/CpA
230719_DMI3_9_R3D_D3D_PRJ.tif	1	230719_DMI3_9_R3D_D3D_PRJ.tif1	CpC_OE	12314	147	0.0119376
230719_DMI4_8_R3D_D3D_PRJ.tif	1	230719_DMI4_8_R3D_D3D_PRJ.tif1	CpC_OE	27503	616	0.0223976
230719_DMI3_1_R3D_D3D_PRJ.tif	1	230719_DMI3_1_R3D_D3D_PRJ.tif1	CpC_OE	9542	224	0.0234752
230721_DMI3_14_R3D_D3D_PRJ.tif	1	230721_DMI3_14_R3D_D3D_PRJ.tif1	CpC_OE	18480	546	0.0295455
230727_DMI8_04_R3D_D3D_PRJ.tif	1	230727_DMI8_04_R3D_D3D_PRJ.tif1	CpC_OE	12748	395	0.0309853
230721_DMI4_7_R3D_D3D_PRJ.tif	1	230721_DMI4_7_R3D_D3D_PRJ.tif1	CpC_OE	7993	257	0.0321531
230721_DMI3_18_R3D_D3D_PRJ.tif	1	230721_DMI3_18_R3D_D3D_PRJ.tif1	CpC_OE	13364	448	0.0335229
230721_DMI3_11_R3D_D3D_PRJ.tif	1	230721_DMI3_11_R3D_D3D_PRJ.tif1	CpC_OE	13259	472	0.0355985
230721_DMI4_4_R3D_D3D_PRJ.tif	1	230721_DMI4_4_R3D_D3D_PRJ.tif1	CpC_OE	15995	701	0.0438262
230719_DMI3_2_R3D_D3D_PRJ.tif	1	230719_DMI3_2_R3D_D3D_PRJ.tif1	CpC_OE	13266	584	0.0440223
230721_DMI4_17_R3D_D3D_PRJ.tif	1	230721_DMI4_17_R3D_D3D_PRJ.tif1	CpC_OE	11519	508	0.0441011
230719_DMI3_4_R3D_D3D_PRJ.tif	1	230719_DMI3_4_R3D_D3D_PRJ.tif1	CpC_OE	11797	531	0.0450114
230721_DMI3_3_R3D_D3D_PRJ.tif	1	230721_DMI3_3_R3D_D3D_PRJ.tif1	CpC_OE	15858	744	0.0469164
230719_DMI4_7_R3D_D3D_PRJ.tif	1	230719_DMI4_7_R3D_D3D_PRJ.tif1	CpC_OE	15250	718	0.047082
230721_DMI3_8_R3D_D3D_PRJ.tif	1	230721_DMI3_8_R3D_D3D_PRJ.tif1	CpC_OE	11934	588	0.049271
230721_DMI3_16_R3D_D3D_PRJ.tif	1	230721_DMI3_16_R3D_D3D_PRJ.tif1	CpC_OE	21453	1100	0.0512749
230721_DMI3_2_R3D_D3D_PRJ.tif	1	230721_DMI3_2_R3D_D3D_PRJ.tif1	CpC_OE	9665	528	0.0546301
230721_DMI4_5_R3D_D3D_PRJ.tif	1	230721_DMI4_5_R3D_D3D_PRJ.tif1	CpC_OE	6253	346	0.0553334
230727_DMI8_01_R3D_D3D_PRJ.tif	1	230727_DMI8_01_R3D_D3D_PRJ.tif1	CpC_OE	20836	1171	0.0562008
230719_DMI3_3_R3D_D3D_PRJ.tif	1	230719_DMI3_3_R3D_D3D_PRJ.tif1	CpC_OE	15895	926	0.0582573
230721_DMI3_17_R3D_D3D_PRJ.tif	1	230721_DMI3_17_R3D_D3D_PRJ.tif1	CpC_OE	11163	705	0.0631551
230727_DMI8_12_R3D_D3D_PRJ.tif	1	230727_DMI8_12_R3D_D3D_PRJ.tif1	CpC_OE	16252	1061	0.0652843
230721_DMI3_6_R3D_D3D_PRJ.tif	1	230721_DMI3_6_R3D_D3D_PRJ.tif1	CpC_OE	22884	1515	0.0662035
230721_DMI3_7_R3D_D3D_PRJ.tif	1	230721_DMI3_7_R3D_D3D_PRJ.tif1	CpC_OE	7356	497	0.0675639
230719_DMI3_8_R3D_D3D_PRJ.tif	1	230719_DMI3_8_R3D_D3D_PRJ.tif1	CpC_OE	6128	431	0.0703329
230727_DMI8_18_R3D_D3D_PRJ.tif	1	230727_DMI8_18_R3D_D3D_PRJ.tif1	CpC_OE	11785	835	0.0708528
230721_DMI4_20_R3D_D3D_PRJ.tif	1	230721_DMI4_20_R3D_D3D_PRJ.tif1	CpC_OE	10544	793	0.0752086
230719_DMI4_4_R3D_D3D_PRJ.tif	1	230719_DMI4_4_R3D_D3D_PRJ.tif1	CpC_OE	24475	2104	0.0859653
230727_DMI8_13_R3D_D3D_PRJ.tif	1	230727_DMI8_13_R3D_D3D_PRJ.tif1	CpC_OE	11801	1042	0.0882976
230727_DMI8_03_R3D_D3D_PRJ.tif	1	230727_DMI8_03_R3D_D3D_PRJ.tif1	CpC_OE	12425	1139	0.09167
230727_DMI8_20_R3D_D3D_PRJ.tif	1	230727_DMI8_20_R3D_D3D_PRJ.tif1	CpC_OE	10093	960	0.0951154
230727_DMI8_07_R3D_D3D_PRJ.tif	1	230727_DMI8_07_R3D_D3D_PRJ.tif1	CpC_OE	5141	493	0.0958957
230721_DMI4_15_R3D_D3D_PRJ.tif	1	230721_DMI4_15_R3D_D3D_PRJ.tif1	CpC_OE	5747	558	0.0970941
230721_DMI3_21_R3D_D3D_PRJ.tif	1	230721_DMI3_21_R3D_D3D_PRJ.tif1	CpC_OE	3306	322	0.0973987
230727_DMI8_15_R3D_D3D_PRJ.tif	1	230727_DMI8_15_R3D_D3D_PRJ.tif1	CpC_OE	8075	853	0.105635
230721_DMI3_12_R3D_D3D_PRJ.tif	1	230721_DMI3_12_R3D_D3D_PRJ.tif1	CpC_OE	7731	884	0.114345
230721_DMI3_22_R3D_D3D_PRJ.tif	1	230721_DMI3_22_R3D_D3D_PRJ.tif1	CpC_OE	8181	975	0.119179
230721_DMI4_19_R3D_D3D_PRJ.tif	1	230721_DMI4_19_R3D_D3D_PRJ.tif1	CpC_OE	13354	1602	0.119964
230721_DMI4_13_R3D_D3D_PRJ.tif	1	230721_DMI4_13_R3D_D3D_PRJ.tif1	CpC_OE	5204	646	0.124135
230721_DMI3_23_R3D_D3D_PRJ.tif	1	230721_DMI3_23_R3D_D3D_PRJ.tif1	CpC_OE	6651	916	0.137724
230721_DMI3_25_R3D_D3D_PRJ.tif	1	230721_DMI3_25_R3D_D3D_PRJ.tif1	CpC_OE	5416	822	0.151773
230721_DMI3_9_R3D_D3D_PRJ.tif	1	230721_DMI3_9_R3D_D3D_PRJ.tif1	CpC_OE	8103	1313	0.162039
230721_DMI3_10_R3D_D3D_PRJ.tif	1	230721_DMI3_10_R3D_D3D_PRJ.tif1	CpC_OE	5517	956	0.173283
230719_DMI4_2_R3D_D3D_PRJ.tif	1	230719_DMI4_2_R3D_D3D_PRJ.tif1	CpC_OE	7777	1484	0.190819
230719_DMI3_6_R3D_D3D_PRJ.tif	1	230719_DMI3_6_R3D_D3D_PRJ.tif1	CpC_OE	14696	2852	0.194066
230721_DMI4_6_R3D_D3D_PRJ.tif	1	230721_DMI4_6_R3D_D3D_PRJ.tif1	CpC_OE	15197	2993	0.196947
230727_DMI8_08_R3D_D3D_PRJ.tif	1	230727_DMI8_08_R3D_D3D_PRJ.tif1	CpC_OE	6754	1358	0.201066
230727_DMI8_17_R3D_D3D_PRJ.tif	1	230727_DMI8_17_R3D_D3D_PRJ.tif1	CpC_OE	2137	451	0.211044
230721_DMI3_13_R3D_D3D_PRJ.tif	1	230721_DMI3_13_R3D_D3D_PRJ.tif1	CpC_OE	4298	913	0.212424
230727_DMI8_16_R3D_D3D_PRJ.tif	1	230727_DMI8_16_R3D_D3D_PRJ.tif1	CpC_OE	6036	1297	0.214877
230721_DMI4_22_R3D_D3D_PRJ.tif	1	230721_DMI4_22_R3D_D3D_PRJ.tif1	CpC_OE	7297	1638	0.224476
230719_DMI3_5_R3D_D3D_PRJ.tif	1	230719_DMI3_5_R3D_D3D_PRJ.tif1	CpC_OE	10948	2478	0.226343
230727_DMI8_06_R3D_D3D_PRJ.tif	1	230727_DMI8_06_R3D_D3D_PRJ.tif1	CpC_OE	11610	2632	0.226701
230721_DMI4_9_R3D_D3D_PRJ.tif	1	230721_DMI4_9_R3D_D3D_PRJ.tif1	CpC_OE	3749	1033	0.27554
230721_DMI4_10_R3D_D3D_PRJ.tif	1	230721_DMI4_10_R3D_D3D_PRJ.tif1	CpC_OE	5265	1498	0.28452
230727_DMI8_11_R3D_D3D_PRJ.tif	1	230727_DMI8_11_R3D_D3D_PRJ.tif1	CpC_OE	18114	5229	0.288672
230721_DMI4_16_R3D_D3D_PRJ.tif	1	230721_DMI4_16_R3D_D3D_PRJ.tif1	CpC_OE	3055	994	0.325368
230719_DMI4_3_R3D_D3D_PRJ.tif	1	230719_DMI4_3_R3D_D3D_PRJ.tif1	CpC_OE	6207	2346	0.37796
230719_DMI3_9_R3D_D3D_PRJ.tif	2	230719_DMI3_9_R3D_D3D_PRJ.tif2	CpC_OE	15905	149	0.00936812
230721_DMI3_17_R3D_D3D_PRJ.tif	2	230721_DMI3_17_R3D_D3D_PRJ.tif2	CpC_OE	34826	413	0.011859
230719_DMI3_8_R3D_D3D_PRJ.tif	2	230719_DMI3_8_R3D_D3D_PRJ.tif2	CpC_OE	23712	572	0.0241228
230721_DMI3_18_R3D_D3D_PRJ.tif	2	230721_DMI3_18_R3D_D3D_PRJ.tif2	CpC_OE	13693	334	0.024392
230719_DMI3_4_R3D_D3D_PRJ.tif	2	230719_DMI3_4_R3D_D3D_PRJ.tif2	CpC_OE	29335	722	0.0246122
230719_DMI3_3_R3D_D3D_PRJ.tif	2	230719_DMI3_3_R3D_D3D_PRJ.tif2	CpC_OE	20446	522	0.0255307
230719_DMI4_3_R3D_D3D_PRJ.tif	2	230719_DMI4_3_R3D_D3D_PRJ.tif2	CpC_OE	27715	737	0.0265921
230721_DMI4_6_R3D_D3D_PRJ.tif	2	230721_DMI4_6_R3D_D3D_PRJ.tif2	CpC_OE	23916	713	0.0298127
230721_DMI3_7_R3D_D3D_PRJ.tif	2	230721_DMI3_7_R3D_D3D_PRJ.tif2	CpC_OE	16951	528	0.0311486
230721_DMI3_16_R3D_D3D_PRJ.tif	2	230721_DMI3_16_R3D_D3D_PRJ.tif2	CpC_OE	8255	381	0.0461538
230721_DMI4_17_R3D_D3D_PRJ.tif	2	230721_DMI4_17_R3D_D3D_PRJ.tif2	CpC_OE	8231	381	0.0462884
230721_DMI3_11_R3D_D3D_PRJ.tif	2	230721_DMI3_11_R3D_D3D_PRJ.tif2	CpC_OE	21146	993	0.0469592
230721_DMI3_22_R3D_D3D_PRJ.tif	2	230721_DMI3_22_R3D_D3D_PRJ.tif2	CpC_OE	9756	479	0.049098
230721_DMI3_14_R3D_D3D_PRJ.tif	2	230721_DMI3_14_R3D_D3D_PRJ.tif2	CpC_OE	9791	489	0.0499438
230727_DMI8_03_R3D_D3D_PRJ.tif	2	230727_DMI8_03_R3D_D3D_PRJ.tif2	CpC_OE	11974	630	0.052614
230727_DMI8_11_R3D_D3D_PRJ.tif	2	230727_DMI8_11_R3D_D3D_PRJ.tif2	CpC_OE	27141	1441	0.0530931
230727_DMI8_06_R3D_D3D_PRJ.tif	2	230727_DMI8_06_R3D_D3D_PRJ.tif2	CpC_OE	9637	514	0.0533361
230721_DMI3_8_R3D_D3D_PRJ.tif	2	230721_DMI3_8_R3D_D3D_PRJ.tif2	CpC_OE	26133	1429	0.0546818
230727_DMI8_13_R3D_D3D_PRJ.tif	2	230727_DMI8_13_R3D_D3D_PRJ.tif2	CpC_OE	8967	666	0.0742723
230721_DMI4_9_R3D_D3D_PRJ.tif	2	230721_DMI4_9_R3D_D3D_PRJ.tif2	CpC_OE	7669	635	0.0828009
230721_DMI4_4_R3D_D3D_PRJ.tif	2	230721_DMI4_4_R3D_D3D_PRJ.tif2	CpC_OE	5738	495	0.086267
230721_DMI3_25_R3D_D3D_PRJ.tif	2	230721_DMI3_25_R3D_D3D_PRJ.tif2	CpC_OE	5688	508	0.0893108
230719_DMI4_8_R3D_D3D_PRJ.tif	2	230719_DMI4_8_R3D_D3D_PRJ.tif2	CpC_OE	8852	794	0.0896972
230719_DMI4_4_R3D_D3D_PRJ.tif	2	230719_DMI4_4_R3D_D3D_PRJ.tif2	CpC_OE	17700	1616	0.0912994
230721_DMI3_4_R3D_D3D_PRJ.tif	2	230721_DMI3_4_R3D_D3D_PRJ.tif2	CpC_OE	10062	943	0.0937189
230719_DMI3_6_R3D_D3D_PRJ.tif	2	230719_DMI3_6_R3D_D3D_PRJ.tif2	CpC_OE	23145	2269	0.0980341
230727_DMI8_07_R3D_D3D_PRJ.tif	2	230727_DMI8_07_R3D_D3D_PRJ.tif2	CpC_OE	6374	627	0.0983684
230721_DMI4_10_R3D_D3D_PRJ.tif	2	230721_DMI4_10_R3D_D3D_PRJ.tif2	CpC_OE	9771	972	0.099478
230719_DMI3_2_R3D_D3D_PRJ.tif	2	230719_DMI3_2_R3D_D3D_PRJ.tif2	CpC_OE	13685	1375	0.100475
230721_DMI3_12_R3D_D3D_PRJ.tif	2	230721_DMI3_12_R3D_D3D_PRJ.tif2	CpC_OE	7599	784	0.103171
230727_DMI8_12_R3D_D3D_PRJ.tif	2	230727_DMI8_12_R3D_D3D_PRJ.tif2	CpC_OE	10346	1072	0.103615
230721_DMI3_9_R3D_D3D_PRJ.tif	2	230721_DMI3_9_R3D_D3D_PRJ.tif2	CpC_OE	13243	1453	0.109718
230721_DMI4_21_R3D_D3D_PRJ.tif	2	230721_DMI4_21_R3D_D3D_PRJ.tif2	CpC_OE	18622	2044	0.109763
230721_DMI4_22_R3D_D3D_PRJ.tif	2	230721_DMI4_22_R3D_D3D_PRJ.tif2	CpC_OE	12132	1332	0.109792
230721_DMI3_10_R3D_D3D_PRJ.tif	2	230721_DMI3_10_R3D_D3D_PRJ.tif2	CpC_OE	10399	1142	0.109818
230719_DMI3_1_R3D_D3D_PRJ.tif	2	230719_DMI3_1_R3D_D3D_PRJ.tif2	CpC_OE	5376	612	0.113839
230721_DMI3_13_R3D_D3D_PRJ.tif	2	230721_DMI3_13_R3D_D3D_PRJ.tif2	CpC_OE	11189	1330	0.118867
230727_DMI8_15_R3D_D3D_PRJ.tif	2	230727_DMI8_15_R3D_D3D_PRJ.tif2	CpC_OE	14257	1737	0.121835
230721_DMI4_13_R3D_D3D_PRJ.tif	2	230721_DMI4_13_R3D_D3D_PRJ.tif2	CpC_OE	4817	601	0.124766
230727_DMI8_04_R3D_D3D_PRJ.tif	2	230727_DMI8_04_R3D_D3D_PRJ.tif2	CpC_OE	8698	1108	0.127386
230719_DMI4_7_R3D_D3D_PRJ.tif	2	230719_DMI4_7_R3D_D3D_PRJ.tif2	CpC_OE	4496	586	0.130338
230721_DMI3_6_R3D_D3D_PRJ.tif	2	230721_DMI3_6_R3D_D3D_PRJ.tif2	CpC_OE	10595	1430	0.134969
230727_DMI8_16_R3D_D3D_PRJ.tif	2	230727_DMI8_16_R3D_D3D_PRJ.tif2	CpC_OE	12861	1750	0.13607
230721_DMI4_20_R3D_D3D_PRJ.tif	2	230721_DMI4_20_R3D_D3D_PRJ.tif2	CpC_OE	3818	640	0.167627
230727_DMI8_02_R3D_D3D_PRJ.tif	2	230727_DMI8_02_R3D_D3D_PRJ.tif2	CpC_OE	10508	1840	0.175105
230721_DMI4_5_R3D_D3D_PRJ.tif	2	230721_DMI4_5_R3D_D3D_PRJ.tif2	CpC_OE	5187	919	0.177174
230721_DMI4_11_R3D_D3D_PRJ.tif	2	230721_DMI4_11_R3D_D3D_PRJ.tif2	CpC_OE	9492	1767	0.186157
230721_DMI3_23_R3D_D3D_PRJ.tif	2	230721_DMI3_23_R3D_D3D_PRJ.tif2	CpC_OE	6024	1135	0.188413
230721_DMI3_2_R3D_D3D_PRJ.tif	2	230721_DMI3_2_R3D_D3D_PRJ.tif2	CpC_OE	13200	2782	0.210758
230727_DMI8_18_R3D_D3D_PRJ.tif	2	230727_DMI8_18_R3D_D3D_PRJ.tif2	CpC_OE	6297	1368	0.217246
230727_DMI8_17_R3D_D3D_PRJ.tif	2	230727_DMI8_17_R3D_D3D_PRJ.tif2	CpC_OE	3390	828	0.244248
230727_DMI8_01_R3D_D3D_PRJ.tif	2	230727_DMI8_01_R3D_D3D_PRJ.tif2	CpC_OE	8200	2216	0.270244
230727_DMI8_19_R3D_D3D_PRJ.tif	2	230727_DMI8_19_R3D_D3D_PRJ.tif2	CpC_OE	4728	1293	0.273477
230727_DMI8_08_R3D_D3D_PRJ.tif	2	230727_DMI8_08_R3D_D3D_PRJ.tif2	CpC_OE	10907	3113	0.285413
230727_DMI8_20_R3D_D3D_PRJ.tif	2	230727_DMI8_20_R3D_D3D_PRJ.tif2	CpC_OE	11672	3353	0.287269
230721_DMI4_7_R3D_D3D_PRJ.tif	2	230721_DMI4_7_R3D_D3D_PRJ.tif2	CpC_OE	5712	1656	0.289916
230721_DMI3_1_R3D_D3D_PRJ.tif	2	230721_DMI3_1_R3D_D3D_PRJ.tif2	CpC_OE	7282	2213	0.3039
230727_DMI8_10_R3D_D3D_PRJ.tif	2	230727_DMI8_10_R3D_D3D_PRJ.tif2	CpC_OE	6864	2126	0.309732
230719_DMI3_5_R3D_D3D_PRJ.tif	2	230719_DMI3_5_R3D_D3D_PRJ.tif2	CpC_OE	8985	3120	0.347245
230721_DMI3_3_R3D_D3D_PRJ.tif	2	230721_DMI3_3_R3D_D3D_PRJ.tif2	CpC_OE	18655	6647	0.356312
230719_DMI4_2_R3D_D3D_PRJ.tif	2	230719_DMI4_2_R3D_D3D_PRJ.tif2	CpC_OE	11837	4267	0.36048
230719_DMI3_9_R3D_D3D_PRJ.tif	3	230719_DMI3_9_R3D_D3D_PRJ.tif3	CpC_OE	14040	230	0.0163818
230719_DMI4_8_R3D_D3D_PRJ.tif	3	230719_DMI4_8_R3D_D3D_PRJ.tif3	CpC_OE	11161	218	0.0195323
230719_DMI3_1_R3D_D3D_PRJ.tif	3	230719_DMI3_1_R3D_D3D_PRJ.tif3	CpC_OE	11041	250	0.0226429
230719_DMI4_7_R3D_D3D_PRJ.tif	3	230719_DMI4_7_R3D_D3D_PRJ.tif3	CpC_OE	19251	470	0.0244143
230719_DMI3_4_R3D_D3D_PRJ.tif	3	230719_DMI3_4_R3D_D3D_PRJ.tif3	CpC_OE	19093	540	0.0282826
230721_DMI3_14_R3D_D3D_PRJ.tif	3	230721_DMI3_14_R3D_D3D_PRJ.tif3	CpC_OE	9894	283	0.0286032
230721_DMI3_16_R3D_D3D_PRJ.tif	3	230721_DMI3_16_R3D_D3D_PRJ.tif3	CpC_OE	20596	599	0.0290833
230721_DMI3_18_R3D_D3D_PRJ.tif	3	230721_DMI3_18_R3D_D3D_PRJ.tif3	CpC_OE	22143	731	0.0330127
230719_DMI3_8_R3D_D3D_PRJ.tif	3	230719_DMI3_8_R3D_D3D_PRJ.tif3	CpC_OE	11732	393	0.0334981
230721_DMI3_8_R3D_D3D_PRJ.tif	3	230721_DMI3_8_R3D_D3D_PRJ.tif3	CpC_OE	13971	537	0.0384368
230727_DMI8_07_R3D_D3D_PRJ.tif	3	230727_DMI8_07_R3D_D3D_PRJ.tif3	CpC_OE	10793	428	0.0396553
230721_DMI4_4_R3D_D3D_PRJ.tif	3	230721_DMI4_4_R3D_D3D_PRJ.tif3	CpC_OE	8968	401	0.0447145
230721_DMI4_22_R3D_D3D_PRJ.tif	3	230721_DMI4_22_R3D_D3D_PRJ.tif3	CpC_OE	11769	536	0.0455434
230719_DMI4_4_R3D_D3D_PRJ.tif	3	230719_DMI4_4_R3D_D3D_PRJ.tif3	CpC_OE	25581	1249	0.0488253
230721_DMI4_21_R3D_D3D_PRJ.tif	3	230721_DMI4_21_R3D_D3D_PRJ.tif3	CpC_OE	19866	1034	0.0520487
230721_DMI4_5_R3D_D3D_PRJ.tif	3	230721_DMI4_5_R3D_D3D_PRJ.tif3	CpC_OE	8927	473	0.0529853
230727_DMI8_01_R3D_D3D_PRJ.tif	3	230727_DMI8_01_R3D_D3D_PRJ.tif3	CpC_OE	10932	645	0.0590011
230721_DMI3_7_R3D_D3D_PRJ.tif	3	230721_DMI3_7_R3D_D3D_PRJ.tif3	CpC_OE	8190	525	0.0641026
230727_DMI8_06_R3D_D3D_PRJ.tif	3	230727_DMI8_06_R3D_D3D_PRJ.tif3	CpC_OE	14578	949	0.0650981
230721_DMI3_21_R3D_D3D_PRJ.tif	3	230721_DMI3_21_R3D_D3D_PRJ.tif3	CpC_OE	7081	467	0.0659511
230721_DMI3_3_R3D_D3D_PRJ.tif	3	230721_DMI3_3_R3D_D3D_PRJ.tif3	CpC_OE	12716	856	0.0673168
230719_DMI3_5_R3D_D3D_PRJ.tif	3	230719_DMI3_5_R3D_D3D_PRJ.tif3	CpC_OE	26356	1917	0.0727349
230721_DMI3_17_R3D_D3D_PRJ.tif	3	230721_DMI3_17_R3D_D3D_PRJ.tif3	CpC_OE	13983	1052	0.0752342
230721_DMI4_10_R3D_D3D_PRJ.tif	3	230721_DMI4_10_R3D_D3D_PRJ.tif3	CpC_OE	7343	575	0.0783059
230721_DMI3_11_R3D_D3D_PRJ.tif	3	230721_DMI3_11_R3D_D3D_PRJ.tif3	CpC_OE	4868	387	0.0794988
230721_DMI4_17_R3D_D3D_PRJ.tif	3	230721_DMI4_17_R3D_D3D_PRJ.tif3	CpC_OE	6489	540	0.0832178
230721_DMI3_6_R3D_D3D_PRJ.tif	3	230721_DMI3_6_R3D_D3D_PRJ.tif3	CpC_OE	10315	862	0.0835676
230727_DMI8_17_R3D_D3D_PRJ.tif	3	230727_DMI8_17_R3D_D3D_PRJ.tif3	CpC_OE	5801	506	0.0872263
230721_DMI3_22_R3D_D3D_PRJ.tif	3	230721_DMI3_22_R3D_D3D_PRJ.tif3	CpC_OE	4422	402	0.0909091
230721_DMI4_9_R3D_D3D_PRJ.tif	3	230721_DMI4_9_R3D_D3D_PRJ.tif3	CpC_OE	4892	448	0.0915781
230721_DMI3_1_R3D_D3D_PRJ.tif	3	230721_DMI3_1_R3D_D3D_PRJ.tif3	CpC_OE	8588	847	0.098626
230721_DMI3_12_R3D_D3D_PRJ.tif	3	230721_DMI3_12_R3D_D3D_PRJ.tif3	CpC_OE	7896	789	0.099924
230721_DMI3_2_R3D_D3D_PRJ.tif	3	230721_DMI3_2_R3D_D3D_PRJ.tif3	CpC_OE	13703	1409	0.102824
230721_DMI3_13_R3D_D3D_PRJ.tif	3	230721_DMI3_13_R3D_D3D_PRJ.tif3	CpC_OE	8480	900	0.106132
230727_DMI8_09_R3D_D3D_PRJ.tif	3	230727_DMI8_09_R3D_D3D_PRJ.tif3	CpC_OE	13773	1519	0.110288
230727_DMI8_03_R3D_D3D_PRJ.tif	3	230727_DMI8_03_R3D_D3D_PRJ.tif3	CpC_OE	11934	1324	0.110944
230719_DMI3_2_R3D_D3D_PRJ.tif	3	230719_DMI3_2_R3D_D3D_PRJ.tif3	CpC_OE	6571	751	0.11429
230727_DMI8_04_R3D_D3D_PRJ.tif	3	230727_DMI8_04_R3D_D3D_PRJ.tif3	CpC_OE	9545	1098	0.115034
230721_DMI4_19_R3D_D3D_PRJ.tif	3	230721_DMI4_19_R3D_D3D_PRJ.tif3	CpC_OE	8747	1044	0.119355
230721_DMI3_25_R3D_D3D_PRJ.tif	3	230721_DMI3_25_R3D_D3D_PRJ.tif3	CpC_OE	9074	1096	0.120785
230721_DMI4_14_R3D_D3D_PRJ.tif	3	230721_DMI4_14_R3D_D3D_PRJ.tif3	CpC_OE	11589	1519	0.131073
230719_DMI3_3_R3D_D3D_PRJ.tif	3	230719_DMI3_3_R3D_D3D_PRJ.tif3	CpC_OE	6379	887	0.13905
230721_DMI3_23_R3D_D3D_PRJ.tif	3	230721_DMI3_23_R3D_D3D_PRJ.tif3	CpC_OE	3162	461	0.145794
230727_DMI8_18_R3D_D3D_PRJ.tif	3	230727_DMI8_18_R3D_D3D_PRJ.tif3	CpC_OE	11203	1774	0.15835
230721_DMI4_7_R3D_D3D_PRJ.tif	3	230721_DMI4_7_R3D_D3D_PRJ.tif3	CpC_OE	5175	847	0.163671
230721_DMI4_6_R3D_D3D_PRJ.tif	3	230721_DMI4_6_R3D_D3D_PRJ.tif3	CpC_OE	6511	1165	0.178928
230721_DMI3_10_R3D_D3D_PRJ.tif	3	230721_DMI3_10_R3D_D3D_PRJ.tif3	CpC_OE	5924	1060	0.178933
230727_DMI8_15_R3D_D3D_PRJ.tif	3	230727_DMI8_15_R3D_D3D_PRJ.tif3	CpC_OE	9833	1786	0.181633
230721_DMI4_13_R3D_D3D_PRJ.tif	3	230721_DMI4_13_R3D_D3D_PRJ.tif3	CpC_OE	8034	1762	0.219318
230727_DMI8_13_R3D_D3D_PRJ.tif	3	230727_DMI8_13_R3D_D3D_PRJ.tif3	CpC_OE	8924	2132	0.238906
230727_DMI8_20_R3D_D3D_PRJ.tif	3	230727_DMI8_20_R3D_D3D_PRJ.tif3	CpC_OE	9567	2350	0.245636
230727_DMI8_10_R3D_D3D_PRJ.tif	3	230727_DMI8_10_R3D_D3D_PRJ.tif3	CpC_OE	4553	1128	0.247749
230719_DMI4_2_R3D_D3D_PRJ.tif	3	230719_DMI4_2_R3D_D3D_PRJ.tif3	CpC_OE	14553	3756	0.258091
230721_DMI4_15_R3D_D3D_PRJ.tif	3	230721_DMI4_15_R3D_D3D_PRJ.tif3	CpC_OE	14559	3896	0.267601
230719_DMI4_3_R3D_D3D_PRJ.tif	3	230719_DMI4_3_R3D_D3D_PRJ.tif3	CpC_OE	9768	2698	0.276208
230721_DMI4_16_R3D_D3D_PRJ.tif	3	230721_DMI4_16_R3D_D3D_PRJ.tif3	CpC_OE	3515	982	0.279374
230727_DMI8_16_R3D_D3D_PRJ.tif	3	230727_DMI8_16_R3D_D3D_PRJ.tif3	CpC_OE	4182	1170	0.27977
230727_DMI8_08_R3D_D3D_PRJ.tif	3	230727_DMI8_08_R3D_D3D_PRJ.tif3	CpC_OE	8261	2625	0.317758
230719_DMI3_1_R3D_D3D_PRJ.tif	4	230719_DMI3_1_R3D_D3D_PRJ.tif4	CpC_OE	13684	303	0.0221426
230721_DMI4_6_R3D_D3D_PRJ.tif	4	230721_DMI4_6_R3D_D3D_PRJ.tif4	CpC_OE	18441	461	0.0249986
230721_DMI4_21_R3D_D3D_PRJ.tif	4	230721_DMI4_21_R3D_D3D_PRJ.tif4	CpC_OE	14301	368	0.0257325
230719_DMI3_8_R3D_D3D_PRJ.tif	4	230719_DMI3_8_R3D_D3D_PRJ.tif4	CpC_OE	13321	350	0.0262743
230721_DMI4_13_R3D_D3D_PRJ.tif	4	230721_DMI4_13_R3D_D3D_PRJ.tif4	CpC_OE	26898	739	0.0274742
230727_DMI8_01_R3D_D3D_PRJ.tif	4	230727_DMI8_01_R3D_D3D_PRJ.tif4	CpC_OE	19309	542	0.0280698
230721_DMI3_14_R3D_D3D_PRJ.tif	4	230721_DMI3_14_R3D_D3D_PRJ.tif4	CpC_OE	18789	539	0.028687
230721_DMI3_18_R3D_D3D_PRJ.tif	4	230721_DMI3_18_R3D_D3D_PRJ.tif4	CpC_OE	23143	866	0.0374195
230719_DMI3_4_R3D_D3D_PRJ.tif	4	230719_DMI3_4_R3D_D3D_PRJ.tif4	CpC_OE	10276	466	0.0453484
230721_DMI3_6_R3D_D3D_PRJ.tif	4	230721_DMI3_6_R3D_D3D_PRJ.tif4	CpC_OE	9464	446	0.047126
230721_DMI4_10_R3D_D3D_PRJ.tif	4	230721_DMI4_10_R3D_D3D_PRJ.tif4	CpC_OE	8730	424	0.0485682
230727_DMI8_19_R3D_D3D_PRJ.tif	4	230727_DMI8_19_R3D_D3D_PRJ.tif4	CpC_OE	8645	435	0.0503181
230721_DMI3_25_R3D_D3D_PRJ.tif	4	230721_DMI3_25_R3D_D3D_PRJ.tif4	CpC_OE	5419	275	0.0507474
230719_DMI3_9_R3D_D3D_PRJ.tif	4	230719_DMI3_9_R3D_D3D_PRJ.tif4	CpC_OE	11857	607	0.0511934
230727_DMI8_04_R3D_D3D_PRJ.tif	4	230727_DMI8_04_R3D_D3D_PRJ.tif4	CpC_OE	9110	522	0.0572997
230721_DMI3_7_R3D_D3D_PRJ.tif	4	230721_DMI3_7_R3D_D3D_PRJ.tif4	CpC_OE	18940	1095	0.0578142
230721_DMI3_2_R3D_D3D_PRJ.tif	4	230721_DMI3_2_R3D_D3D_PRJ.tif4	CpC_OE	12967	815	0.0628519
230727_DMI8_08_R3D_D3D_PRJ.tif	4	230727_DMI8_08_R3D_D3D_PRJ.tif4	CpC_OE	10809	691	0.0639282
230721_DMI3_12_R3D_D3D_PRJ.tif	4	230721_DMI3_12_R3D_D3D_PRJ.tif4	CpC_OE	14716	948	0.0644197
230721_DMI3_13_R3D_D3D_PRJ.tif	4	230721_DMI3_13_R3D_D3D_PRJ.tif4	CpC_OE	12147	821	0.0675887
230721_DMI4_9_R3D_D3D_PRJ.tif	4	230721_DMI4_9_R3D_D3D_PRJ.tif4	CpC_OE	4641	314	0.0676578
230719_DMI3_2_R3D_D3D_PRJ.tif	4	230719_DMI3_2_R3D_D3D_PRJ.tif4	CpC_OE	9242	628	0.0679507
230721_DMI3_8_R3D_D3D_PRJ.tif	4	230721_DMI3_8_R3D_D3D_PRJ.tif4	CpC_OE	9457	690	0.0729618
230721_DMI4_4_R3D_D3D_PRJ.tif	4	230721_DMI4_4_R3D_D3D_PRJ.tif4	CpC_OE	16803	1239	0.0737368
230721_DMI3_10_R3D_D3D_PRJ.tif	4	230721_DMI3_10_R3D_D3D_PRJ.tif4	CpC_OE	8188	608	0.074255
230721_DMI3_16_R3D_D3D_PRJ.tif	4	230721_DMI3_16_R3D_D3D_PRJ.tif4	CpC_OE	7196	576	0.0800445
230721_DMI4_22_R3D_D3D_PRJ.tif	4	230721_DMI4_22_R3D_D3D_PRJ.tif4	CpC_OE	16683	1384	0.0829587
230721_DMI3_3_R3D_D3D_PRJ.tif	4	230721_DMI3_3_R3D_D3D_PRJ.tif4	CpC_OE	18574	1577	0.0849036
230719_DMI4_8_R3D_D3D_PRJ.tif	4	230719_DMI4_8_R3D_D3D_PRJ.tif4	CpC_OE	7586	658	0.0867387
230719_DMI3_5_R3D_D3D_PRJ.tif	4	230719_DMI3_5_R3D_D3D_PRJ.tif4	CpC_OE	23128	2033	0.0879021
230721_DMI4_17_R3D_D3D_PRJ.tif	4	230721_DMI4_17_R3D_D3D_PRJ.tif4	CpC_OE	4887	555	0.113567
230721_DMI4_5_R3D_D3D_PRJ.tif	4	230721_DMI4_5_R3D_D3D_PRJ.tif4	CpC_OE	7766	921	0.118594
230719_DMI3_3_R3D_D3D_PRJ.tif	4	230719_DMI3_3_R3D_D3D_PRJ.tif4	CpC_OE	6406	763	0.119107
230721_DMI4_7_R3D_D3D_PRJ.tif	4	230721_DMI4_7_R3D_D3D_PRJ.tif4	CpC_OE	8519	1024	0.120202
230727_DMI8_15_R3D_D3D_PRJ.tif	4	230727_DMI8_15_R3D_D3D_PRJ.tif4	CpC_OE	5995	766	0.127773
230727_DMI8_18_R3D_D3D_PRJ.tif	4	230727_DMI8_18_R3D_D3D_PRJ.tif4	CpC_OE	24303	3192	0.131342
230721_DMI3_1_R3D_D3D_PRJ.tif	4	230721_DMI3_1_R3D_D3D_PRJ.tif4	CpC_OE	13038	1765	0.135374
230721_DMI4_16_R3D_D3D_PRJ.tif	4	230721_DMI4_16_R3D_D3D_PRJ.tif4	CpC_OE	2747	399	0.145249
230721_DMI3_11_R3D_D3D_PRJ.tif	4	230721_DMI3_11_R3D_D3D_PRJ.tif4	CpC_OE	3876	575	0.148349
230721_DMI3_4_R3D_D3D_PRJ.tif	4	230721_DMI3_4_R3D_D3D_PRJ.tif4	CpC_OE	11734	1789	0.152463
230721_DMI3_21_R3D_D3D_PRJ.tif	4	230721_DMI3_21_R3D_D3D_PRJ.tif4	CpC_OE	5654	905	0.160064
230721_DMI3_17_R3D_D3D_PRJ.tif	4	230721_DMI3_17_R3D_D3D_PRJ.tif4	CpC_OE	19875	3208	0.161409
230719_DMI4_3_R3D_D3D_PRJ.tif	4	230719_DMI4_3_R3D_D3D_PRJ.tif4	CpC_OE	8051	1300	0.161471
230719_DMI3_6_R3D_D3D_PRJ.tif	4	230719_DMI3_6_R3D_D3D_PRJ.tif4	CpC_OE	12440	2059	0.165514
230727_DMI8_20_R3D_D3D_PRJ.tif	4	230727_DMI8_20_R3D_D3D_PRJ.tif4	CpC_OE	7106	1253	0.17633
230727_DMI8_16_R3D_D3D_PRJ.tif	4	230727_DMI8_16_R3D_D3D_PRJ.tif4	CpC_OE	8176	1503	0.183831
230721_DMI3_22_R3D_D3D_PRJ.tif	4	230721_DMI3_22_R3D_D3D_PRJ.tif4	CpC_OE	6681	1394	0.208651
230727_DMI8_10_R3D_D3D_PRJ.tif	4	230727_DMI8_10_R3D_D3D_PRJ.tif4	CpC_OE	8607	1908	0.22168
230727_DMI8_12_R3D_D3D_PRJ.tif	4	230727_DMI8_12_R3D_D3D_PRJ.tif4	CpC_OE	6750	1506	0.223111
230719_DMI4_4_R3D_D3D_PRJ.tif	4	230719_DMI4_4_R3D_D3D_PRJ.tif4	CpC_OE	4235	1046	0.246989
230721_DMI4_12_R3D_D3D_PRJ.tif	4	230721_DMI4_12_R3D_D3D_PRJ.tif4	CpC_OE	5311	1331	0.250612
230727_DMI8_06_R3D_D3D_PRJ.tif	4	230727_DMI8_06_R3D_D3D_PRJ.tif4	CpC_OE	7514	1905	0.253527
230727_DMI8_13_R3D_D3D_PRJ.tif	4	230727_DMI8_13_R3D_D3D_PRJ.tif4	CpC_OE	5941	1584	0.266622
230727_DMI8_17_R3D_D3D_PRJ.tif	4	230727_DMI8_17_R3D_D3D_PRJ.tif4	CpC_OE	9958	2790	0.280177
230721_DMI4_20_R3D_D3D_PRJ.tif	4	230721_DMI4_20_R3D_D3D_PRJ.tif4	CpC_OE	4999	1500	0.30006
230721_DMI3_23_R3D_D3D_PRJ.tif	4	230721_DMI3_23_R3D_D3D_PRJ.tif4	CpC_OE	2586	832	0.321732
230719_DMI4_2_R3D_D3D_PRJ.tif	4	230719_DMI4_2_R3D_D3D_PRJ.tif4	CpC_OE	9681	3174	0.327859
230727_DMI8_11_R3D_D3D_PRJ.tif	4	230727_DMI8_11_R3D_D3D_PRJ.tif4	CpC_OE	15649	5749	0.367372
230719_DMI3_1_R3D_D3D_PRJ.tif	5	230719_DMI3_1_R3D_D3D_PRJ.tif5	CpC_OE	13183	194	0.0147159
230721_DMI3_7_R3D_D3D_PRJ.tif	5	230721_DMI3_7_R3D_D3D_PRJ.tif5	CpC_OE	24269	441	0.0181713
230721_DMI4_22_R3D_D3D_PRJ.tif	5	230721_DMI4_22_R3D_D3D_PRJ.tif5	CpC_OE	12967	275	0.0212077
230721_DMI3_25_R3D_D3D_PRJ.tif	5	230721_DMI3_25_R3D_D3D_PRJ.tif5	CpC_OE	8293	192	0.0231521
230719_DMI3_9_R3D_D3D_PRJ.tif	5	230719_DMI3_9_R3D_D3D_PRJ.tif5	CpC_OE	12470	301	0.0241379
230719_DMI3_4_R3D_D3D_PRJ.tif	5	230719_DMI3_4_R3D_D3D_PRJ.tif5	CpC_OE	20351	600	0.0294826
230727_DMI8_15_R3D_D3D_PRJ.tif	5	230727_DMI8_15_R3D_D3D_PRJ.tif5	CpC_OE	6551	240	0.0366356
230721_DMI3_16_R3D_D3D_PRJ.tif	5	230721_DMI3_16_R3D_D3D_PRJ.tif5	CpC_OE	14026	558	0.0397833
230727_DMI8_03_R3D_D3D_PRJ.tif	5	230727_DMI8_03_R3D_D3D_PRJ.tif5	CpC_OE	13581	543	0.0399823
230721_DMI4_21_R3D_D3D_PRJ.tif	5	230721_DMI4_21_R3D_D3D_PRJ.tif5	CpC_OE	21300	872	0.040939
230721_DMI4_9_R3D_D3D_PRJ.tif	5	230721_DMI4_9_R3D_D3D_PRJ.tif5	CpC_OE	4973	218	0.0438367
230721_DMI4_6_R3D_D3D_PRJ.tif	5	230721_DMI4_6_R3D_D3D_PRJ.tif5	CpC_OE	10152	450	0.0443262
230719_DMI3_8_R3D_D3D_PRJ.tif	5	230719_DMI3_8_R3D_D3D_PRJ.tif5	CpC_OE	16593	827	0.0498403
230727_DMI8_02_R3D_D3D_PRJ.tif	5	230727_DMI8_02_R3D_D3D_PRJ.tif5	CpC_OE	21042	1179	0.0560308
230721_DMI4_10_R3D_D3D_PRJ.tif	5	230721_DMI4_10_R3D_D3D_PRJ.tif5	CpC_OE	12944	753	0.0581737
230721_DMI3_23_R3D_D3D_PRJ.tif	5	230721_DMI3_23_R3D_D3D_PRJ.tif5	CpC_OE	4963	297	0.0598428
230721_DMI3_21_R3D_D3D_PRJ.tif	5	230721_DMI3_21_R3D_D3D_PRJ.tif5	CpC_OE	7775	471	0.0605788
230721_DMI3_10_R3D_D3D_PRJ.tif	5	230721_DMI3_10_R3D_D3D_PRJ.tif5	CpC_OE	13339	826	0.0619237
230721_DMI4_16_R3D_D3D_PRJ.tif	5	230721_DMI4_16_R3D_D3D_PRJ.tif5	CpC_OE	1745	110	0.0630372
230727_DMI8_13_R3D_D3D_PRJ.tif	5	230727_DMI8_13_R3D_D3D_PRJ.tif5	CpC_OE	13833	889	0.0642666
230721_DMI3_14_R3D_D3D_PRJ.tif	5	230721_DMI3_14_R3D_D3D_PRJ.tif5	CpC_OE	18729	1209	0.0645523
230719_DMI3_5_R3D_D3D_PRJ.tif	5	230719_DMI3_5_R3D_D3D_PRJ.tif5	CpC_OE	21684	1447	0.0667312
230721_DMI3_8_R3D_D3D_PRJ.tif	5	230721_DMI3_8_R3D_D3D_PRJ.tif5	CpC_OE	7338	500	0.0681385
230721_DMI4_5_R3D_D3D_PRJ.tif	5	230721_DMI4_5_R3D_D3D_PRJ.tif5	CpC_OE	11786	850	0.0721195
230721_DMI3_22_R3D_D3D_PRJ.tif	5	230721_DMI3_22_R3D_D3D_PRJ.tif5	CpC_OE	9217	669	0.0725833
230719_DMI4_7_R3D_D3D_PRJ.tif	5	230719_DMI4_7_R3D_D3D_PRJ.tif5	CpC_OE	12651	957	0.0756462
230721_DMI3_6_R3D_D3D_PRJ.tif	5	230721_DMI3_6_R3D_D3D_PRJ.tif5	CpC_OE	7638	578	0.0756743
230721_DMI3_18_R3D_D3D_PRJ.tif	5	230721_DMI3_18_R3D_D3D_PRJ.tif5	CpC_OE	4539	368	0.0810751
230719_DMI3_6_R3D_D3D_PRJ.tif	5	230719_DMI3_6_R3D_D3D_PRJ.tif5	CpC_OE	13487	1266	0.0938682
230719_DMI3_2_R3D_D3D_PRJ.tif	5	230719_DMI3_2_R3D_D3D_PRJ.tif5	CpC_OE	5058	475	0.0939106
230719_DMI4_8_R3D_D3D_PRJ.tif	5	230719_DMI4_8_R3D_D3D_PRJ.tif5	CpC_OE	6357	597	0.0939122
230727_DMI8_07_R3D_D3D_PRJ.tif	5	230727_DMI8_07_R3D_D3D_PRJ.tif5	CpC_OE	13759	1583	0.115052
230719_DMI3_7_R3D_D3D_PRJ.tif	5	230719_DMI3_7_R3D_D3D_PRJ.tif5	CpC_OE	25559	2965	0.116006
230727_DMI8_04_R3D_D3D_PRJ.tif	5	230727_DMI8_04_R3D_D3D_PRJ.tif5	CpC_OE	5012	592	0.118117
230721_DMI4_4_R3D_D3D_PRJ.tif	5	230721_DMI4_4_R3D_D3D_PRJ.tif5	CpC_OE	12578	1557	0.123788
230727_DMI8_19_R3D_D3D_PRJ.tif	5	230727_DMI8_19_R3D_D3D_PRJ.tif5	CpC_OE	7050	884	0.12539
230721_DMI3_2_R3D_D3D_PRJ.tif	5	230721_DMI3_2_R3D_D3D_PRJ.tif5	CpC_OE	6319	804	0.127235
230727_DMI8_16_R3D_D3D_PRJ.tif	5	230727_DMI8_16_R3D_D3D_PRJ.tif5	CpC_OE	9497	1213	0.127725
230721_DMI4_17_R3D_D3D_PRJ.tif	5	230721_DMI4_17_R3D_D3D_PRJ.tif5	CpC_OE	6141	798	0.129946
230719_DMI4_4_R3D_D3D_PRJ.tif	5	230719_DMI4_4_R3D_D3D_PRJ.tif5	CpC_OE	12937	1714	0.132488
230727_DMI8_10_R3D_D3D_PRJ.tif	5	230727_DMI8_10_R3D_D3D_PRJ.tif5	CpC_OE	10262	1365	0.133015
230721_DMI3_11_R3D_D3D_PRJ.tif	5	230721_DMI3_11_R3D_D3D_PRJ.tif5	CpC_OE	16249	2227	0.137055
230721_DMI4_7_R3D_D3D_PRJ.tif	5	230721_DMI4_7_R3D_D3D_PRJ.tif5	CpC_OE	5197	795	0.152973
230721_DMI3_12_R3D_D3D_PRJ.tif	5	230721_DMI3_12_R3D_D3D_PRJ.tif5	CpC_OE	4824	763	0.158167
230721_DMI4_20_R3D_D3D_PRJ.tif	5	230721_DMI4_20_R3D_D3D_PRJ.tif5	CpC_OE	11906	2046	0.171846
230721_DMI4_11_R3D_D3D_PRJ.tif	5	230721_DMI4_11_R3D_D3D_PRJ.tif5	CpC_OE	4583	791	0.172594
230727_DMI8_18_R3D_D3D_PRJ.tif	5	230727_DMI8_18_R3D_D3D_PRJ.tif5	CpC_OE	13847	2906	0.209865
230727_DMI8_12_R3D_D3D_PRJ.tif	5	230727_DMI8_12_R3D_D3D_PRJ.tif5	CpC_OE	8706	2020	0.232024
230719_DMI3_3_R3D_D3D_PRJ.tif	5	230719_DMI3_3_R3D_D3D_PRJ.tif5	CpC_OE	3235	825	0.255023
230721_DMI3_4_R3D_D3D_PRJ.tif	5	230721_DMI3_4_R3D_D3D_PRJ.tif5	CpC_OE	10719	2773	0.2587
230727_DMI8_11_R3D_D3D_PRJ.tif	5	230727_DMI8_11_R3D_D3D_PRJ.tif5	CpC_OE	13328	3506	0.263055
230719_DMI4_1_R3D_D3D_PRJ.tif	5	230719_DMI4_1_R3D_D3D_PRJ.tif5	CpC_OE	22093	5841	0.264382
230719_DMI4_2_R3D_D3D_PRJ.tif	5	230719_DMI4_2_R3D_D3D_PRJ.tif5	CpC_OE	10151	2990	0.294552
230721_DMI3_17_R3D_D3D_PRJ.tif	5	230721_DMI3_17_R3D_D3D_PRJ.tif5	CpC_OE	5497	1739	0.316354
230719_DMI4_5_R3D_D3D_PRJ.tif	5	230719_DMI4_5_R3D_D3D_PRJ.tif5	CpC_OE	18165	6209	0.341811
230727_DMI8_06_R3D_D3D_PRJ.tif	5	230727_DMI8_06_R3D_D3D_PRJ.tif5	CpC_OE	9957	3551	0.356634
230719_DMI3_9_R3D_D3D_PRJ.tif	6	230719_DMI3_9_R3D_D3D_PRJ.tif6	CpC_OE	9610	122	0.0126951
230721_DMI3_8_R3D_D3D_PRJ.tif	6	230721_DMI3_8_R3D_D3D_PRJ.tif6	CpC_OE	29134	515	0.0176769
230719_DMI3_8_R3D_D3D_PRJ.tif	6	230719_DMI3_8_R3D_D3D_PRJ.tif6	CpC_OE	24265	521	0.0214713
230721_DMI4_13_R3D_D3D_PRJ.tif	6	230721_DMI4_13_R3D_D3D_PRJ.tif6	CpC_OE	30224	710	0.0234913
230721_DMI3_14_R3D_D3D_PRJ.tif	6	230721_DMI3_14_R3D_D3D_PRJ.tif6	CpC_OE	11318	313	0.0276551
230721_DMI4_21_R3D_D3D_PRJ.tif	6	230721_DMI4_21_R3D_D3D_PRJ.tif6	CpC_OE	19739	592	0.0299914
230721_DMI3_17_R3D_D3D_PRJ.tif	6	230721_DMI3_17_R3D_D3D_PRJ.tif6	CpC_OE	32654	1034	0.0316653
230721_DMI3_11_R3D_D3D_PRJ.tif	6	230721_DMI3_11_R3D_D3D_PRJ.tif6	CpC_OE	16867	600	0.0355724
230719_DMI4_7_R3D_D3D_PRJ.tif	6	230719_DMI4_7_R3D_D3D_PRJ.tif6	CpC_OE	19500	695	0.035641
230721_DMI3_22_R3D_D3D_PRJ.tif	6	230721_DMI3_22_R3D_D3D_PRJ.tif6	CpC_OE	12234	450	0.0367827
230721_DMI3_21_R3D_D3D_PRJ.tif	6	230721_DMI3_21_R3D_D3D_PRJ.tif6	CpC_OE	5859	238	0.0406213
230721_DMI3_25_R3D_D3D_PRJ.tif	6	230721_DMI3_25_R3D_D3D_PRJ.tif6	CpC_OE	8019	336	0.0419005
230719_DMI3_1_R3D_D3D_PRJ.tif	6	230719_DMI3_1_R3D_D3D_PRJ.tif6	CpC_OE	9089	395	0.0434591
230721_DMI4_5_R3D_D3D_PRJ.tif	6	230721_DMI4_5_R3D_D3D_PRJ.tif6	CpC_OE	6486	322	0.0496454
230719_DMI3_4_R3D_D3D_PRJ.tif	6	230719_DMI3_4_R3D_D3D_PRJ.tif6	CpC_OE	22606	1144	0.050606
230727_DMI8_17_R3D_D3D_PRJ.tif	6	230727_DMI8_17_R3D_D3D_PRJ.tif6	CpC_OE	8170	483	0.0591187
230721_DMI3_13_R3D_D3D_PRJ.tif	6	230721_DMI3_13_R3D_D3D_PRJ.tif6	CpC_OE	12871	793	0.0616114
230727_DMI8_02_R3D_D3D_PRJ.tif	6	230727_DMI8_02_R3D_D3D_PRJ.tif6	CpC_OE	13542	877	0.0647615
230721_DMI3_18_R3D_D3D_PRJ.tif	6	230721_DMI3_18_R3D_D3D_PRJ.tif6	CpC_OE	4753	310	0.065222
230727_DMI8_06_R3D_D3D_PRJ.tif	6	230727_DMI8_06_R3D_D3D_PRJ.tif6	CpC_OE	9914	650	0.0655638
230721_DMI4_22_R3D_D3D_PRJ.tif	6	230721_DMI4_22_R3D_D3D_PRJ.tif6	CpC_OE	12387	854	0.0689432
230727_DMI8_03_R3D_D3D_PRJ.tif	6	230727_DMI8_03_R3D_D3D_PRJ.tif6	CpC_OE	9117	748	0.0820445
230719_DMI4_3_R3D_D3D_PRJ.tif	6	230719_DMI4_3_R3D_D3D_PRJ.tif6	CpC_OE	13270	1359	0.102411
230721_DMI3_23_R3D_D3D_PRJ.tif	6	230721_DMI3_23_R3D_D3D_PRJ.tif6	CpC_OE	8966	927	0.103391
230727_DMI8_10_R3D_D3D_PRJ.tif	6	230727_DMI8_10_R3D_D3D_PRJ.tif6	CpC_OE	14881	1541	0.103555
230719_DMI3_3_R3D_D3D_PRJ.tif	6	230719_DMI3_3_R3D_D3D_PRJ.tif6	CpC_OE	13992	1559	0.111421
230721_DMI3_10_R3D_D3D_PRJ.tif	6	230721_DMI3_10_R3D_D3D_PRJ.tif6	CpC_OE	13561	1598	0.117838
230721_DMI4_9_R3D_D3D_PRJ.tif	6	230721_DMI4_9_R3D_D3D_PRJ.tif6	CpC_OE	4474	538	0.12025
230721_DMI4_7_R3D_D3D_PRJ.tif	6	230721_DMI4_7_R3D_D3D_PRJ.tif6	CpC_OE	4716	603	0.127863
230721_DMI4_10_R3D_D3D_PRJ.tif	6	230721_DMI4_10_R3D_D3D_PRJ.tif6	CpC_OE	4869	624	0.128158
230721_DMI4_17_R3D_D3D_PRJ.tif	6	230721_DMI4_17_R3D_D3D_PRJ.tif6	CpC_OE	4641	602	0.129713
230719_DMI3_5_R3D_D3D_PRJ.tif	6	230719_DMI3_5_R3D_D3D_PRJ.tif6	CpC_OE	15894	2068	0.130112
230727_DMI8_19_R3D_D3D_PRJ.tif	6	230727_DMI8_19_R3D_D3D_PRJ.tif6	CpC_OE	10276	1395	0.135753
230727_DMI8_04_R3D_D3D_PRJ.tif	6	230727_DMI8_04_R3D_D3D_PRJ.tif6	CpC_OE	5171	702	0.135757
230727_DMI8_13_R3D_D3D_PRJ.tif	6	230727_DMI8_13_R3D_D3D_PRJ.tif6	CpC_OE	11182	1572	0.140583
230727_DMI8_12_R3D_D3D_PRJ.tif	6	230727_DMI8_12_R3D_D3D_PRJ.tif6	CpC_OE	12322	1756	0.142509
230721_DMI4_16_R3D_D3D_PRJ.tif	6	230721_DMI4_16_R3D_D3D_PRJ.tif6	CpC_OE	2391	343	0.143455
230727_DMI8_18_R3D_D3D_PRJ.tif	6	230727_DMI8_18_R3D_D3D_PRJ.tif6	CpC_OE	11378	1694	0.148884
230721_DMI3_16_R3D_D3D_PRJ.tif	6	230721_DMI3_16_R3D_D3D_PRJ.tif6	CpC_OE	8431	1262	0.149686
230727_DMI8_16_R3D_D3D_PRJ.tif	6	230727_DMI8_16_R3D_D3D_PRJ.tif6	CpC_OE	6774	1186	0.175081
230721_DMI4_4_R3D_D3D_PRJ.tif	6	230721_DMI4_4_R3D_D3D_PRJ.tif6	CpC_OE	2973	559	0.188026
230721_DMI3_3_R3D_D3D_PRJ.tif	6	230721_DMI3_3_R3D_D3D_PRJ.tif6	CpC_OE	12185	2313	0.189824
230727_DMI8_08_R3D_D3D_PRJ.tif	6	230727_DMI8_08_R3D_D3D_PRJ.tif6	CpC_OE	8526	1621	0.190124
230721_DMI4_11_R3D_D3D_PRJ.tif	6	230721_DMI4_11_R3D_D3D_PRJ.tif6	CpC_OE	8615	1746	0.20267
230721_DMI4_6_R3D_D3D_PRJ.tif	6	230721_DMI4_6_R3D_D3D_PRJ.tif6	CpC_OE	6562	1350	0.20573
230721_DMI3_1_R3D_D3D_PRJ.tif	6	230721_DMI3_1_R3D_D3D_PRJ.tif6	CpC_OE	9324	1995	0.213964
230727_DMI8_20_R3D_D3D_PRJ.tif	6	230727_DMI8_20_R3D_D3D_PRJ.tif6	CpC_OE	14175	3042	0.214603
230727_DMI8_07_R3D_D3D_PRJ.tif	6	230727_DMI8_07_R3D_D3D_PRJ.tif6	CpC_OE	6316	1383	0.218968
230727_DMI8_15_R3D_D3D_PRJ.tif	6	230727_DMI8_15_R3D_D3D_PRJ.tif6	CpC_OE	6207	1380	0.22233
230721_DMI3_9_R3D_D3D_PRJ.tif	6	230721_DMI3_9_R3D_D3D_PRJ.tif6	CpC_OE	13207	3263	0.247066
230719_DMI4_8_R3D_D3D_PRJ.tif	6	230719_DMI4_8_R3D_D3D_PRJ.tif6	CpC_OE	2580	668	0.258915
230719_DMI4_4_R3D_D3D_PRJ.tif	6	230719_DMI4_4_R3D_D3D_PRJ.tif6	CpC_OE	4982	1309	0.262746
230721_DMI3_7_R3D_D3D_PRJ.tif	6	230721_DMI3_7_R3D_D3D_PRJ.tif6	CpC_OE	4755	1254	0.263722
230721_DMI3_12_R3D_D3D_PRJ.tif	6	230721_DMI3_12_R3D_D3D_PRJ.tif6	CpC_OE	9372	2907	0.310179
230721_DMI4_20_R3D_D3D_PRJ.tif	6	230721_DMI4_20_R3D_D3D_PRJ.tif6	CpC_OE	2324	740	0.318417
230721_DMI3_4_R3D_D3D_PRJ.tif	6	230721_DMI3_4_R3D_D3D_PRJ.tif6	CpC_OE	18878	7084	0.375252
230721_DMI4_9_R3D_D3D_PRJ.tif	7	230721_DMI4_9_R3D_D3D_PRJ.tif7	CpC_OE	13545	243	0.0179402
230719_DMI3_3_R3D_D3D_PRJ.tif	7	230719_DMI3_3_R3D_D3D_PRJ.tif7	CpC_OE	13115	267	0.0203584
230721_DMI4_5_R3D_D3D_PRJ.tif	7	230721_DMI4_5_R3D_D3D_PRJ.tif7	CpC_OE	8491	202	0.0237899
230719_DMI3_4_R3D_D3D_PRJ.tif	7	230719_DMI3_4_R3D_D3D_PRJ.tif7	CpC_OE	22223	552	0.0248391
230719_DMI3_8_R3D_D3D_PRJ.tif	7	230719_DMI3_8_R3D_D3D_PRJ.tif7	CpC_OE	16121	505	0.0313256
230719_DMI3_9_R3D_D3D_PRJ.tif	7	230719_DMI3_9_R3D_D3D_PRJ.tif7	CpC_OE	7256	247	0.0340408
230721_DMI3_18_R3D_D3D_PRJ.tif	7	230721_DMI3_18_R3D_D3D_PRJ.tif7	CpC_OE	8440	310	0.0367299
230721_DMI4_7_R3D_D3D_PRJ.tif	7	230721_DMI4_7_R3D_D3D_PRJ.tif7	CpC_OE	18593	699	0.0375948
230721_DMI4_6_R3D_D3D_PRJ.tif	7	230721_DMI4_6_R3D_D3D_PRJ.tif7	CpC_OE	11356	432	0.0380416
230721_DMI3_25_R3D_D3D_PRJ.tif	7	230721_DMI3_25_R3D_D3D_PRJ.tif7	CpC_OE	11003	450	0.0408979
230721_DMI3_4_R3D_D3D_PRJ.tif	7	230721_DMI3_4_R3D_D3D_PRJ.tif7	CpC_OE	14499	608	0.0419339
230719_DMI4_7_R3D_D3D_PRJ.tif	7	230719_DMI4_7_R3D_D3D_PRJ.tif7	CpC_OE	20791	1031	0.0495888
230721_DMI4_4_R3D_D3D_PRJ.tif	7	230721_DMI4_4_R3D_D3D_PRJ.tif7	CpC_OE	10184	512	0.0502749
230721_DMI3_14_R3D_D3D_PRJ.tif	7	230721_DMI3_14_R3D_D3D_PRJ.tif7	CpC_OE	6804	343	0.0504115
230721_DMI3_3_R3D_D3D_PRJ.tif	7	230721_DMI3_3_R3D_D3D_PRJ.tif7	CpC_OE	15245	870	0.0570679
230727_DMI8_01_R3D_D3D_PRJ.tif	7	230727_DMI8_01_R3D_D3D_PRJ.tif7	CpC_OE	9063	518	0.0571555
230721_DMI3_11_R3D_D3D_PRJ.tif	7	230721_DMI3_11_R3D_D3D_PRJ.tif7	CpC_OE	12566	747	0.0594461
230721_DMI3_2_R3D_D3D_PRJ.tif	7	230721_DMI3_2_R3D_D3D_PRJ.tif7	CpC_OE	11257	719	0.0638714
230721_DMI4_13_R3D_D3D_PRJ.tif	7	230721_DMI4_13_R3D_D3D_PRJ.tif7	CpC_OE	11019	753	0.0683365
230721_DMI3_13_R3D_D3D_PRJ.tif	7	230721_DMI3_13_R3D_D3D_PRJ.tif7	CpC_OE	14413	1031	0.0715326
230719_DMI3_1_R3D_D3D_PRJ.tif	7	230719_DMI3_1_R3D_D3D_PRJ.tif7	CpC_OE	6572	477	0.0725806
230727_DMI8_10_R3D_D3D_PRJ.tif	7	230727_DMI8_10_R3D_D3D_PRJ.tif7	CpC_OE	14879	1101	0.0739969
230721_DMI3_17_R3D_D3D_PRJ.tif	7	230721_DMI3_17_R3D_D3D_PRJ.tif7	CpC_OE	9606	793	0.0825526
230719_DMI3_6_R3D_D3D_PRJ.tif	7	230719_DMI3_6_R3D_D3D_PRJ.tif7	CpC_OE	23930	1981	0.0827831
230721_DMI4_22_R3D_D3D_PRJ.tif	7	230721_DMI4_22_R3D_D3D_PRJ.tif7	CpC_OE	16467	1376	0.0835611
230727_DMI8_18_R3D_D3D_PRJ.tif	7	230727_DMI8_18_R3D_D3D_PRJ.tif7	CpC_OE	8522	730	0.0856606
230721_DMI4_10_R3D_D3D_PRJ.tif	7	230721_DMI4_10_R3D_D3D_PRJ.tif7	CpC_OE	9719	838	0.0862229
230721_DMI4_21_R3D_D3D_PRJ.tif	7	230721_DMI4_21_R3D_D3D_PRJ.tif7	CpC_OE	20399	1783	0.0874062
230719_DMI4_4_R3D_D3D_PRJ.tif	7	230719_DMI4_4_R3D_D3D_PRJ.tif7	CpC_OE	14469	1347	0.0930956
230727_DMI8_03_R3D_D3D_PRJ.tif	7	230727_DMI8_03_R3D_D3D_PRJ.tif7	CpC_OE	8263	786	0.0951228
230721_DMI3_16_R3D_D3D_PRJ.tif	7	230721_DMI3_16_R3D_D3D_PRJ.tif7	CpC_OE	8439	833	0.0987084
230721_DMI4_20_R3D_D3D_PRJ.tif	7	230721_DMI4_20_R3D_D3D_PRJ.tif7	CpC_OE	5068	507	0.100039
230721_DMI4_17_R3D_D3D_PRJ.tif	7	230721_DMI4_17_R3D_D3D_PRJ.tif7	CpC_OE	10556	1076	0.101933
230721_DMI4_16_R3D_D3D_PRJ.tif	7	230721_DMI4_16_R3D_D3D_PRJ.tif7	CpC_OE	3124	320	0.102433
230719_DMI4_2_R3D_D3D_PRJ.tif	7	230719_DMI4_2_R3D_D3D_PRJ.tif7	CpC_OE	24112	2484	0.103019
230727_DMI8_12_R3D_D3D_PRJ.tif	7	230727_DMI8_12_R3D_D3D_PRJ.tif7	CpC_OE	12814	1325	0.103403
230721_DMI3_6_R3D_D3D_PRJ.tif	7	230721_DMI3_6_R3D_D3D_PRJ.tif7	CpC_OE	5547	582	0.104922
230721_DMI4_11_R3D_D3D_PRJ.tif	7	230721_DMI4_11_R3D_D3D_PRJ.tif7	CpC_OE	6081	676	0.111166
230721_DMI3_12_R3D_D3D_PRJ.tif	7	230721_DMI3_12_R3D_D3D_PRJ.tif7	CpC_OE	8001	892	0.111486
230727_DMI8_06_R3D_D3D_PRJ.tif	7	230727_DMI8_06_R3D_D3D_PRJ.tif7	CpC_OE	5680	635	0.111796
230727_DMI8_16_R3D_D3D_PRJ.tif	7	230727_DMI8_16_R3D_D3D_PRJ.tif7	CpC_OE	7005	805	0.114918
230727_DMI8_19_R3D_D3D_PRJ.tif	7	230727_DMI8_19_R3D_D3D_PRJ.tif7	CpC_OE	17175	2113	0.123028
230719_DMI3_2_R3D_D3D_PRJ.tif	7	230719_DMI3_2_R3D_D3D_PRJ.tif7	CpC_OE	8095	1005	0.124151
230721_DMI3_7_R3D_D3D_PRJ.tif	7	230721_DMI3_7_R3D_D3D_PRJ.tif7	CpC_OE	9127	1211	0.132683
230727_DMI8_08_R3D_D3D_PRJ.tif	7	230727_DMI8_08_R3D_D3D_PRJ.tif7	CpC_OE	11078	1494	0.134862
230719_DMI4_8_R3D_D3D_PRJ.tif	7	230719_DMI4_8_R3D_D3D_PRJ.tif7	CpC_OE	3421	471	0.137679
230719_DMI3_5_R3D_D3D_PRJ.tif	7	230719_DMI3_5_R3D_D3D_PRJ.tif7	CpC_OE	10191	1589	0.155922
230727_DMI8_13_R3D_D3D_PRJ.tif	7	230727_DMI8_13_R3D_D3D_PRJ.tif7	CpC_OE	9349	1614	0.172639
230721_DMI3_1_R3D_D3D_PRJ.tif	7	230721_DMI3_1_R3D_D3D_PRJ.tif7	CpC_OE	14461	2520	0.174262
230721_DMI3_8_R3D_D3D_PRJ.tif	7	230721_DMI3_8_R3D_D3D_PRJ.tif7	CpC_OE	5346	940	0.175832
230727_DMI8_15_R3D_D3D_PRJ.tif	7	230727_DMI8_15_R3D_D3D_PRJ.tif7	CpC_OE	4756	843	0.17725
230721_DMI3_23_R3D_D3D_PRJ.tif	7	230721_DMI3_23_R3D_D3D_PRJ.tif7	CpC_OE	7034	1420	0.201877
230721_DMI3_21_R3D_D3D_PRJ.tif	7	230721_DMI3_21_R3D_D3D_PRJ.tif7	CpC_OE	3225	659	0.204341
230721_DMI3_22_R3D_D3D_PRJ.tif	7	230721_DMI3_22_R3D_D3D_PRJ.tif7	CpC_OE	4605	964	0.209338
230721_DMI3_10_R3D_D3D_PRJ.tif	7	230721_DMI3_10_R3D_D3D_PRJ.tif7	CpC_OE	3409	726	0.212966
230727_DMI8_11_R3D_D3D_PRJ.tif	7	230727_DMI8_11_R3D_D3D_PRJ.tif7	CpC_OE	8834	1889	0.213833
230727_DMI8_20_R3D_D3D_PRJ.tif	7	230727_DMI8_20_R3D_D3D_PRJ.tif7	CpC_OE	5018	1093	0.217816
230727_DMI8_17_R3D_D3D_PRJ.tif	7	230727_DMI8_17_R3D_D3D_PRJ.tif7	CpC_OE	8603	1978	0.22992
230727_DMI8_07_R3D_D3D_PRJ.tif	7	230727_DMI8_07_R3D_D3D_PRJ.tif7	CpC_OE	7776	1848	0.237654
230721_DMI4_12_R3D_D3D_PRJ.tif	7	230721_DMI4_12_R3D_D3D_PRJ.tif7	CpC_OE	11485	3220	0.280366
230721_DMI3_9_R3D_D3D_PRJ.tif	7	230721_DMI3_9_R3D_D3D_PRJ.tif7	CpC_OE	6670	2058	0.308546
230719_DMI3_7_R3D_D3D_PRJ.tif	7	230719_DMI3_7_R3D_D3D_PRJ.tif7	CpC_OE	27728	9404	0.339152
230719_DMI3_8_R3D_D3D_PRJ.tif	8	230719_DMI3_8_R3D_D3D_PRJ.tif8	CpC_OE	17173	265	0.0154312
230721_DMI3_18_R3D_D3D_PRJ.tif	8	230721_DMI3_18_R3D_D3D_PRJ.tif8	CpC_OE	12573	266	0.0211564
230719_DMI3_9_R3D_D3D_PRJ.tif	8	230719_DMI3_9_R3D_D3D_PRJ.tif8	CpC_OE	9650	216	0.0223834
230719_DMI4_8_R3D_D3D_PRJ.tif	8	230719_DMI4_8_R3D_D3D_PRJ.tif8	CpC_OE	14314	321	0.0224256
230727_DMI8_15_R3D_D3D_PRJ.tif	8	230727_DMI8_15_R3D_D3D_PRJ.tif8	CpC_OE	12630	295	0.0233571
230721_DMI3_16_R3D_D3D_PRJ.tif	8	230721_DMI3_16_R3D_D3D_PRJ.tif8	CpC_OE	17742	487	0.027449
230719_DMI3_4_R3D_D3D_PRJ.tif	8	230719_DMI3_4_R3D_D3D_PRJ.tif8	CpC_OE	24668	694	0.0281336
230721_DMI3_22_R3D_D3D_PRJ.tif	8	230721_DMI3_22_R3D_D3D_PRJ.tif8	CpC_OE	9942	295	0.0296721
230719_DMI3_1_R3D_D3D_PRJ.tif	8	230719_DMI3_1_R3D_D3D_PRJ.tif8	CpC_OE	23436	874	0.0372931
230721_DMI4_16_R3D_D3D_PRJ.tif	8	230721_DMI4_16_R3D_D3D_PRJ.tif8	CpC_OE	7657	330	0.0430978
230727_DMI8_07_R3D_D3D_PRJ.tif	8	230727_DMI8_07_R3D_D3D_PRJ.tif8	CpC_OE	9311	463	0.0497261
230721_DMI3_13_R3D_D3D_PRJ.tif	8	230721_DMI3_13_R3D_D3D_PRJ.tif8	CpC_OE	11593	591	0.050979
230721_DMI3_14_R3D_D3D_PRJ.tif	8	230721_DMI3_14_R3D_D3D_PRJ.tif8	CpC_OE	20877	1067	0.0511089
230721_DMI3_8_R3D_D3D_PRJ.tif	8	230721_DMI3_8_R3D_D3D_PRJ.tif8	CpC_OE	28754	1502	0.0522362
230721_DMI3_12_R3D_D3D_PRJ.tif	8	230721_DMI3_12_R3D_D3D_PRJ.tif8	CpC_OE	11582	637	0.0549991
230721_DMI4_5_R3D_D3D_PRJ.tif	8	230721_DMI4_5_R3D_D3D_PRJ.tif8	CpC_OE	11722	654	0.0557925
230721_DMI4_19_R3D_D3D_PRJ.tif	8	230721_DMI4_19_R3D_D3D_PRJ.tif8	CpC_OE	10776	619	0.0574425
230719_DMI3_2_R3D_D3D_PRJ.tif	8	230719_DMI3_2_R3D_D3D_PRJ.tif8	CpC_OE	9771	570	0.0583359
230721_DMI3_17_R3D_D3D_PRJ.tif	8	230721_DMI3_17_R3D_D3D_PRJ.tif8	CpC_OE	5049	330	0.0653595
230719_DMI3_3_R3D_D3D_PRJ.tif	8	230719_DMI3_3_R3D_D3D_PRJ.tif8	CpC_OE	11426	787	0.068878
230721_DMI4_21_R3D_D3D_PRJ.tif	8	230721_DMI4_21_R3D_D3D_PRJ.tif8	CpC_OE	10180	709	0.0696464
230719_DMI3_5_R3D_D3D_PRJ.tif	8	230719_DMI3_5_R3D_D3D_PRJ.tif8	CpC_OE	16747	1212	0.0723712
230721_DMI4_13_R3D_D3D_PRJ.tif	8	230721_DMI4_13_R3D_D3D_PRJ.tif8	CpC_OE	7355	543	0.0738273
230721_DMI4_10_R3D_D3D_PRJ.tif	8	230721_DMI4_10_R3D_D3D_PRJ.tif8	CpC_OE	10910	875	0.0802016
230721_DMI3_21_R3D_D3D_PRJ.tif	8	230721_DMI3_21_R3D_D3D_PRJ.tif8	CpC_OE	9727	846	0.0869744
230719_DMI3_6_R3D_D3D_PRJ.tif	8	230719_DMI3_6_R3D_D3D_PRJ.tif8	CpC_OE	25439	2259	0.0888007
230721_DMI3_25_R3D_D3D_PRJ.tif	8	230721_DMI3_25_R3D_D3D_PRJ.tif8	CpC_OE	8763	782	0.0892388
230727_DMI8_04_R3D_D3D_PRJ.tif	8	230727_DMI8_04_R3D_D3D_PRJ.tif8	CpC_OE	4333	399	0.092084
230727_DMI8_12_R3D_D3D_PRJ.tif	8	230727_DMI8_12_R3D_D3D_PRJ.tif8	CpC_OE	12923	1263	0.0977327
230721_DMI4_11_R3D_D3D_PRJ.tif	8	230721_DMI4_11_R3D_D3D_PRJ.tif8	CpC_OE	12059	1201	0.0995937
230727_DMI8_13_R3D_D3D_PRJ.tif	8	230727_DMI8_13_R3D_D3D_PRJ.tif8	CpC_OE	13400	1444	0.107761
230721_DMI3_11_R3D_D3D_PRJ.tif	8	230721_DMI3_11_R3D_D3D_PRJ.tif8	CpC_OE	3501	386	0.110254
230721_DMI3_15_R3D_D3D_PRJ.tif	8	230721_DMI3_15_R3D_D3D_PRJ.tif8	CpC_OE	7752	933	0.120356
230721_DMI3_7_R3D_D3D_PRJ.tif	8	230721_DMI3_7_R3D_D3D_PRJ.tif8	CpC_OE	3907	480	0.122856
230719_DMI4_7_R3D_D3D_PRJ.tif	8	230719_DMI4_7_R3D_D3D_PRJ.tif8	CpC_OE	5632	704	0.125
230727_DMI8_03_R3D_D3D_PRJ.tif	8	230727_DMI8_03_R3D_D3D_PRJ.tif8	CpC_OE	13258	1831	0.138105
230721_DMI4_22_R3D_D3D_PRJ.tif	8	230721_DMI4_22_R3D_D3D_PRJ.tif8	CpC_OE	7854	1114	0.141839
230727_DMI8_20_R3D_D3D_PRJ.tif	8	230727_DMI8_20_R3D_D3D_PRJ.tif8	CpC_OE	7245	1034	0.142719
230727_DMI8_01_R3D_D3D_PRJ.tif	8	230727_DMI8_01_R3D_D3D_PRJ.tif8	CpC_OE	9602	1394	0.145178
230727_DMI8_17_R3D_D3D_PRJ.tif	8	230727_DMI8_17_R3D_D3D_PRJ.tif8	CpC_OE	4142	610	0.147272
230721_DMI3_10_R3D_D3D_PRJ.tif	8	230721_DMI3_10_R3D_D3D_PRJ.tif8	CpC_OE	6660	991	0.148799
230719_DMI4_3_R3D_D3D_PRJ.tif	8	230719_DMI4_3_R3D_D3D_PRJ.tif8	CpC_OE	8393	1292	0.153938
230719_DMI4_4_R3D_D3D_PRJ.tif	8	230719_DMI4_4_R3D_D3D_PRJ.tif8	CpC_OE	6980	1100	0.157593
230721_DMI4_6_R3D_D3D_PRJ.tif	8	230721_DMI4_6_R3D_D3D_PRJ.tif8	CpC_OE	10020	1606	0.160279
230727_DMI8_02_R3D_D3D_PRJ.tif	8	230727_DMI8_02_R3D_D3D_PRJ.tif8	CpC_OE	5393	917	0.170035
230721_DMI4_7_R3D_D3D_PRJ.tif	8	230721_DMI4_7_R3D_D3D_PRJ.tif8	CpC_OE	3330	580	0.174174
230727_DMI8_11_R3D_D3D_PRJ.tif	8	230727_DMI8_11_R3D_D3D_PRJ.tif8	CpC_OE	9616	1718	0.178661
230721_DMI4_9_R3D_D3D_PRJ.tif	8	230721_DMI4_9_R3D_D3D_PRJ.tif8	CpC_OE	2999	539	0.179727
230727_DMI8_16_R3D_D3D_PRJ.tif	8	230727_DMI8_16_R3D_D3D_PRJ.tif8	CpC_OE	5794	1172	0.202278
230721_DMI3_9_R3D_D3D_PRJ.tif	8	230721_DMI3_9_R3D_D3D_PRJ.tif8	CpC_OE	9881	2037	0.206153
230721_DMI3_23_R3D_D3D_PRJ.tif	8	230721_DMI3_23_R3D_D3D_PRJ.tif8	CpC_OE	3506	738	0.210496
230719_DMI3_7_R3D_D3D_PRJ.tif	8	230719_DMI3_7_R3D_D3D_PRJ.tif8	CpC_OE	8371	1844	0.220284
230721_DMI4_17_R3D_D3D_PRJ.tif	8	230721_DMI4_17_R3D_D3D_PRJ.tif8	CpC_OE	8913	2130	0.238977
230727_DMI8_06_R3D_D3D_PRJ.tif	8	230727_DMI8_06_R3D_D3D_PRJ.tif8	CpC_OE	9443	2354	0.249285
230721_DMI4_20_R3D_D3D_PRJ.tif	8	230721_DMI4_20_R3D_D3D_PRJ.tif8	CpC_OE	3707	1127	0.304019
230721_DMI4_15_R3D_D3D_PRJ.tif	8	230721_DMI4_15_R3D_D3D_PRJ.tif8	CpC_OE	14075	4478	0.318153
230721_DMI4_12_R3D_D3D_PRJ.tif	8	230721_DMI4_12_R3D_D3D_PRJ.tif8	CpC_OE	8025	2640	0.328972
230721_DMI4_4_R3D_D3D_PRJ.tif	8	230721_DMI4_4_R3D_D3D_PRJ.tif8	CpC_OE	8340	2761	0.331055
230721_DMI3_1_R3D_D3D_PRJ.tif	8	230721_DMI3_1_R3D_D3D_PRJ.tif8	CpC_OE	5162	1882	0.364587
230721_DMI3_8_R3D_D3D_PRJ.tif	9	230721_DMI3_8_R3D_D3D_PRJ.tif9	CpC_OE	11242	205	0.0182352
230719_DMI3_8_R3D_D3D_PRJ.tif	9	230719_DMI3_8_R3D_D3D_PRJ.tif9	CpC_OE	12747	358	0.028085
230721_DMI4_16_R3D_D3D_PRJ.tif	9	230721_DMI4_16_R3D_D3D_PRJ.tif9	CpC_OE	6251	207	0.0331147
230719_DMI4_7_R3D_D3D_PRJ.tif	9	230719_DMI4_7_R3D_D3D_PRJ.tif9	CpC_OE	14790	510	0.0344828
230719_DMI3_4_R3D_D3D_PRJ.tif	9	230719_DMI3_4_R3D_D3D_PRJ.tif9	CpC_OE	21503	780	0.036274
230721_DMI3_11_R3D_D3D_PRJ.tif	9	230721_DMI3_11_R3D_D3D_PRJ.tif9	CpC_OE	7333	290	0.0395473
230721_DMI3_17_R3D_D3D_PRJ.tif	9	230721_DMI3_17_R3D_D3D_PRJ.tif9	CpC_OE	11345	456	0.0401939
230719_DMI3_1_R3D_D3D_PRJ.tif	9	230719_DMI3_1_R3D_D3D_PRJ.tif9	CpC_OE	9169	392	0.0427528
230721_DMI4_17_R3D_D3D_PRJ.tif	9	230721_DMI4_17_R3D_D3D_PRJ.tif9	CpC_OE	13809	615	0.0445362
230721_DMI3_18_R3D_D3D_PRJ.tif	9	230721_DMI3_18_R3D_D3D_PRJ.tif9	CpC_OE	7080	320	0.0451977
230721_DMI3_25_R3D_D3D_PRJ.tif	9	230721_DMI3_25_R3D_D3D_PRJ.tif9	CpC_OE	7792	371	0.0476129
230719_DMI4_8_R3D_D3D_PRJ.tif	9	230719_DMI4_8_R3D_D3D_PRJ.tif9	CpC_OE	10978	547	0.0498269
230719_DMI3_9_R3D_D3D_PRJ.tif	9	230719_DMI3_9_R3D_D3D_PRJ.tif9	CpC_OE	6767	341	0.0503916
230721_DMI4_15_R3D_D3D_PRJ.tif	9	230721_DMI4_15_R3D_D3D_PRJ.tif9	CpC_OE	7916	418	0.0528044
230727_DMI8_08_R3D_D3D_PRJ.tif	9	230727_DMI8_08_R3D_D3D_PRJ.tif9	CpC_OE	14115	793	0.0561814
230727_DMI8_07_R3D_D3D_PRJ.tif	9	230727_DMI8_07_R3D_D3D_PRJ.tif9	CpC_OE	7646	433	0.0566309
230727_DMI8_06_R3D_D3D_PRJ.tif	9	230727_DMI8_06_R3D_D3D_PRJ.tif9	CpC_OE	7920	457	0.057702
230721_DMI4_11_R3D_D3D_PRJ.tif	9	230721_DMI4_11_R3D_D3D_PRJ.tif9	CpC_OE	11202	712	0.0635601
230721_DMI4_22_R3D_D3D_PRJ.tif	9	230721_DMI4_22_R3D_D3D_PRJ.tif9	CpC_OE	11515	827	0.0718194
230721_DMI3_4_R3D_D3D_PRJ.tif	9	230721_DMI3_4_R3D_D3D_PRJ.tif9	CpC_OE	14884	1085	0.0728971
230721_DMI4_5_R3D_D3D_PRJ.tif	9	230721_DMI4_5_R3D_D3D_PRJ.tif9	CpC_OE	10830	801	0.0739612
230727_DMI8_18_R3D_D3D_PRJ.tif	9	230727_DMI8_18_R3D_D3D_PRJ.tif9	CpC_OE	20381	1512	0.0741867
230721_DMI4_9_R3D_D3D_PRJ.tif	9	230721_DMI4_9_R3D_D3D_PRJ.tif9	CpC_OE	7323	545	0.0744231
230721_DMI4_4_R3D_D3D_PRJ.tif	9	230721_DMI4_4_R3D_D3D_PRJ.tif9	CpC_OE	5393	411	0.0762099
230721_DMI4_6_R3D_D3D_PRJ.tif	9	230721_DMI4_6_R3D_D3D_PRJ.tif9	CpC_OE	10222	780	0.076306
230721_DMI3_16_R3D_D3D_PRJ.tif	9	230721_DMI3_16_R3D_D3D_PRJ.tif9	CpC_OE	11701	899	0.076831
230721_DMI3_7_R3D_D3D_PRJ.tif	9	230721_DMI3_7_R3D_D3D_PRJ.tif9	CpC_OE	10938	914	0.0835619
230721_DMI4_21_R3D_D3D_PRJ.tif	9	230721_DMI4_21_R3D_D3D_PRJ.tif9	CpC_OE	21853	1833	0.0838786
230727_DMI8_01_R3D_D3D_PRJ.tif	9	230727_DMI8_01_R3D_D3D_PRJ.tif9	CpC_OE	12876	1186	0.0921094
230721_DMI4_7_R3D_D3D_PRJ.tif	9	230721_DMI4_7_R3D_D3D_PRJ.tif9	CpC_OE	9049	897	0.099127
230721_DMI3_14_R3D_D3D_PRJ.tif	9	230721_DMI3_14_R3D_D3D_PRJ.tif9	CpC_OE	5950	692	0.116303
230721_DMI3_6_R3D_D3D_PRJ.tif	9	230721_DMI3_6_R3D_D3D_PRJ.tif9	CpC_OE	9132	1131	0.12385
230719_DMI3_3_R3D_D3D_PRJ.tif	9	230719_DMI3_3_R3D_D3D_PRJ.tif9	CpC_OE	3886	484	0.12455
230727_DMI8_20_R3D_D3D_PRJ.tif	9	230727_DMI8_20_R3D_D3D_PRJ.tif9	CpC_OE	14176	1847	0.130291
230721_DMI3_2_R3D_D3D_PRJ.tif	9	230721_DMI3_2_R3D_D3D_PRJ.tif9	CpC_OE	7390	970	0.131258
230727_DMI8_15_R3D_D3D_PRJ.tif	9	230727_DMI8_15_R3D_D3D_PRJ.tif9	CpC_OE	8293	1145	0.138068
230721_DMI3_12_R3D_D3D_PRJ.tif	9	230721_DMI3_12_R3D_D3D_PRJ.tif9	CpC_OE	5220	722	0.138314
230721_DMI3_10_R3D_D3D_PRJ.tif	9	230721_DMI3_10_R3D_D3D_PRJ.tif9	CpC_OE	6123	897	0.146497
230727_DMI8_19_R3D_D3D_PRJ.tif	9	230727_DMI8_19_R3D_D3D_PRJ.tif9	CpC_OE	11565	1821	0.157458
230727_DMI8_13_R3D_D3D_PRJ.tif	9	230727_DMI8_13_R3D_D3D_PRJ.tif9	CpC_OE	11670	1929	0.165296
230721_DMI4_13_R3D_D3D_PRJ.tif	9	230721_DMI4_13_R3D_D3D_PRJ.tif9	CpC_OE	9013	1536	0.170421
230727_DMI8_03_R3D_D3D_PRJ.tif	9	230727_DMI8_03_R3D_D3D_PRJ.tif9	CpC_OE	8972	1598	0.17811
230719_DMI3_6_R3D_D3D_PRJ.tif	9	230719_DMI3_6_R3D_D3D_PRJ.tif9	CpC_OE	11320	2063	0.182244
230719_DMI3_5_R3D_D3D_PRJ.tif	9	230719_DMI3_5_R3D_D3D_PRJ.tif9	CpC_OE	12797	2444	0.190982
230719_DMI4_4_R3D_D3D_PRJ.tif	9	230719_DMI4_4_R3D_D3D_PRJ.tif9	CpC_OE	22173	4338	0.195643
230727_DMI8_12_R3D_D3D_PRJ.tif	9	230727_DMI8_12_R3D_D3D_PRJ.tif9	CpC_OE	6636	1302	0.196203
230721_DMI3_9_R3D_D3D_PRJ.tif	9	230721_DMI3_9_R3D_D3D_PRJ.tif9	CpC_OE	11866	2533	0.213467
230721_DMI4_14_R3D_D3D_PRJ.tif	9	230721_DMI4_14_R3D_D3D_PRJ.tif9	CpC_OE	5523	1183	0.214195
230721_DMI3_23_R3D_D3D_PRJ.tif	9	230721_DMI3_23_R3D_D3D_PRJ.tif9	CpC_OE	3540	793	0.224011
230721_DMI3_1_R3D_D3D_PRJ.tif	9	230721_DMI3_1_R3D_D3D_PRJ.tif9	CpC_OE	5486	1393	0.253919
230727_DMI8_11_R3D_D3D_PRJ.tif	9	230727_DMI8_11_R3D_D3D_PRJ.tif9	CpC_OE	15702	4219	0.268692
230721_DMI3_22_R3D_D3D_PRJ.tif	9	230721_DMI3_22_R3D_D3D_PRJ.tif9	CpC_OE	1758	494	0.281001
230721_DMI3_21_R3D_D3D_PRJ.tif	9	230721_DMI3_21_R3D_D3D_PRJ.tif9	CpC_OE	3716	1047	0.281755
230721_DMI4_19_R3D_D3D_PRJ.tif	9	230721_DMI4_19_R3D_D3D_PRJ.tif9	CpC_OE	16304	4609	0.282691
230727_DMI8_04_R3D_D3D_PRJ.tif	9	230727_DMI8_04_R3D_D3D_PRJ.tif9	CpC_OE	4698	1470	0.312899
230721_DMI4_12_R3D_D3D_PRJ.tif	9	230721_DMI4_12_R3D_D3D_PRJ.tif9	CpC_OE	3829	1201	0.313659
230721_DMI4_10_R3D_D3D_PRJ.tif	9	230721_DMI4_10_R3D_D3D_PRJ.tif9	CpC_OE	3816	1209	0.316824
230721_DMI3_13_R3D_D3D_PRJ.tif	9	230721_DMI3_13_R3D_D3D_PRJ.tif9	CpC_OE	5304	1718	0.323906
230727_DMI8_02_R3D_D3D_PRJ.tif	9	230727_DMI8_02_R3D_D3D_PRJ.tif9	CpC_OE	4783	1667	0.348526
230727_DMI8_10_R3D_D3D_PRJ.tif	9	230727_DMI8_10_R3D_D3D_PRJ.tif9	CpC_OE	8044	3016	0.374938
230719_DMI3_4_R3D_D3D_PRJ.tif	10	230719_DMI3_4_R3D_D3D_PRJ.tif10	CpC_OE	11662	239	0.0204939
230721_DMI3_18_R3D_D3D_PRJ.tif	10	230721_DMI3_18_R3D_D3D_PRJ.tif10	CpC_OE	13616	373	0.0273942
230719_DMI3_3_R3D_D3D_PRJ.tif	10	230719_DMI3_3_R3D_D3D_PRJ.tif10	CpC_OE	16039	502	0.0312987
230721_DMI4_6_R3D_D3D_PRJ.tif	10	230721_DMI4_6_R3D_D3D_PRJ.tif10	CpC_OE	9444	374	0.0396019
230721_DMI4_9_R3D_D3D_PRJ.tif	10	230721_DMI4_9_R3D_D3D_PRJ.tif10	CpC_OE	6993	308	0.044044
230719_DMI4_3_R3D_D3D_PRJ.tif	10	230719_DMI4_3_R3D_D3D_PRJ.tif10	CpC_OE	27989	1241	0.0443388
230721_DMI3_25_R3D_D3D_PRJ.tif	10	230721_DMI3_25_R3D_D3D_PRJ.tif10	CpC_OE	11818	525	0.0444238
230721_DMI3_17_R3D_D3D_PRJ.tif	10	230721_DMI3_17_R3D_D3D_PRJ.tif10	CpC_OE	12222	552	0.0451645
230721_DMI3_11_R3D_D3D_PRJ.tif	10	230721_DMI3_11_R3D_D3D_PRJ.tif10	CpC_OE	19851	992	0.0499723
230719_DMI3_9_R3D_D3D_PRJ.tif	10	230719_DMI3_9_R3D_D3D_PRJ.tif10	CpC_OE	7483	374	0.04998
230721_DMI4_12_R3D_D3D_PRJ.tif	10	230721_DMI4_12_R3D_D3D_PRJ.tif10	CpC_OE	14638	790	0.0539691
230727_DMI8_18_R3D_D3D_PRJ.tif	10	230727_DMI8_18_R3D_D3D_PRJ.tif10	CpC_OE	12968	750	0.0578347
230721_DMI3_12_R3D_D3D_PRJ.tif	10	230721_DMI3_12_R3D_D3D_PRJ.tif10	CpC_OE	10063	595	0.0591275
230721_DMI3_13_R3D_D3D_PRJ.tif	10	230721_DMI3_13_R3D_D3D_PRJ.tif10	CpC_OE	11684	710	0.0607669
230721_DMI3_8_R3D_D3D_PRJ.tif	10	230721_DMI3_8_R3D_D3D_PRJ.tif10	CpC_OE	9351	593	0.0634157
230719_DMI4_7_R3D_D3D_PRJ.tif	10	230719_DMI4_7_R3D_D3D_PRJ.tif10	CpC_OE	14938	960	0.0642656
230721_DMI4_7_R3D_D3D_PRJ.tif	10	230721_DMI4_7_R3D_D3D_PRJ.tif10	CpC_OE	5607	395	0.0704477
230727_DMI8_10_R3D_D3D_PRJ.tif	10	230727_DMI8_10_R3D_D3D_PRJ.tif10	CpC_OE	10330	746	0.0722168
230719_DMI3_5_R3D_D3D_PRJ.tif	10	230719_DMI3_5_R3D_D3D_PRJ.tif10	CpC_OE	21486	1552	0.0722331
230719_DMI3_1_R3D_D3D_PRJ.tif	10	230719_DMI3_1_R3D_D3D_PRJ.tif10	CpC_OE	4965	359	0.0723061
230721_DMI3_1_R3D_D3D_PRJ.tif	10	230721_DMI3_1_R3D_D3D_PRJ.tif10	CpC_OE	22402	1703	0.07602
230721_DMI4_5_R3D_D3D_PRJ.tif	10	230721_DMI4_5_R3D_D3D_PRJ.tif10	CpC_OE	9732	804	0.0826141
230721_DMI4_13_R3D_D3D_PRJ.tif	10	230721_DMI4_13_R3D_D3D_PRJ.tif10	CpC_OE	8442	750	0.0888415
230719_DMI3_6_R3D_D3D_PRJ.tif	10	230719_DMI3_6_R3D_D3D_PRJ.tif10	CpC_OE	15117	1402	0.0927433
230721_DMI4_22_R3D_D3D_PRJ.tif	10	230721_DMI4_22_R3D_D3D_PRJ.tif10	CpC_OE	23582	2194	0.0930371
230727_DMI8_07_R3D_D3D_PRJ.tif	10	230727_DMI8_07_R3D_D3D_PRJ.tif10	CpC_OE	4081	383	0.0938495
230721_DMI4_17_R3D_D3D_PRJ.tif	10	230721_DMI4_17_R3D_D3D_PRJ.tif10	CpC_OE	8010	759	0.0947566
230727_DMI8_01_R3D_D3D_PRJ.tif	10	230727_DMI8_01_R3D_D3D_PRJ.tif10	CpC_OE	10948	1056	0.096456
230721_DMI3_22_R3D_D3D_PRJ.tif	10	230721_DMI3_22_R3D_D3D_PRJ.tif10	CpC_OE	4491	440	0.0979737
230721_DMI3_16_R3D_D3D_PRJ.tif	10	230721_DMI3_16_R3D_D3D_PRJ.tif10	CpC_OE	9614	965	0.100374
230721_DMI3_2_R3D_D3D_PRJ.tif	10	230721_DMI3_2_R3D_D3D_PRJ.tif10	CpC_OE	6089	674	0.110691
230727_DMI8_17_R3D_D3D_PRJ.tif	10	230727_DMI8_17_R3D_D3D_PRJ.tif10	CpC_OE	6068	684	0.112722
230727_DMI8_13_R3D_D3D_PRJ.tif	10	230727_DMI8_13_R3D_D3D_PRJ.tif10	CpC_OE	11131	1263	0.113467
230727_DMI8_08_R3D_D3D_PRJ.tif	10	230727_DMI8_08_R3D_D3D_PRJ.tif10	CpC_OE	8699	1021	0.11737
230721_DMI3_14_R3D_D3D_PRJ.tif	10	230721_DMI3_14_R3D_D3D_PRJ.tif10	CpC_OE	8156	983	0.120525
230727_DMI8_15_R3D_D3D_PRJ.tif	10	230727_DMI8_15_R3D_D3D_PRJ.tif10	CpC_OE	8891	1114	0.125295
230721_DMI4_21_R3D_D3D_PRJ.tif	10	230721_DMI4_21_R3D_D3D_PRJ.tif10	CpC_OE	6413	807	0.125838
230721_DMI3_10_R3D_D3D_PRJ.tif	10	230721_DMI3_10_R3D_D3D_PRJ.tif10	CpC_OE	4726	623	0.131824
230721_DMI4_10_R3D_D3D_PRJ.tif	10	230721_DMI4_10_R3D_D3D_PRJ.tif10	CpC_OE	7790	1059	0.135944
230727_DMI8_04_R3D_D3D_PRJ.tif	10	230727_DMI8_04_R3D_D3D_PRJ.tif10	CpC_OE	5563	799	0.143628
230727_DMI8_02_R3D_D3D_PRJ.tif	10	230727_DMI8_02_R3D_D3D_PRJ.tif10	CpC_OE	6209	912	0.146884
230721_DMI3_9_R3D_D3D_PRJ.tif	10	230721_DMI3_9_R3D_D3D_PRJ.tif10	CpC_OE	8707	1321	0.151717
230721_DMI3_23_R3D_D3D_PRJ.tif	10	230721_DMI3_23_R3D_D3D_PRJ.tif10	CpC_OE	3796	576	0.151739
230719_DMI4_8_R3D_D3D_PRJ.tif	10	230719_DMI4_8_R3D_D3D_PRJ.tif10	CpC_OE	5539	889	0.160498
230719_DMI3_8_R3D_D3D_PRJ.tif	10	230719_DMI3_8_R3D_D3D_PRJ.tif10	CpC_OE	4207	676	0.160685
230719_DMI4_4_R3D_D3D_PRJ.tif	10	230719_DMI4_4_R3D_D3D_PRJ.tif10	CpC_OE	9192	1599	0.173956
230721_DMI3_7_R3D_D3D_PRJ.tif	10	230721_DMI3_7_R3D_D3D_PRJ.tif10	CpC_OE	5990	1061	0.177129
230727_DMI8_03_R3D_D3D_PRJ.tif	10	230727_DMI8_03_R3D_D3D_PRJ.tif10	CpC_OE	4861	870	0.178976
230727_DMI8_11_R3D_D3D_PRJ.tif	10	230727_DMI8_11_R3D_D3D_PRJ.tif10	CpC_OE	8454	1521	0.179915
230727_DMI8_20_R3D_D3D_PRJ.tif	10	230727_DMI8_20_R3D_D3D_PRJ.tif10	CpC_OE	8376	1667	0.199021
230721_DMI4_4_R3D_D3D_PRJ.tif	10	230721_DMI4_4_R3D_D3D_PRJ.tif10	CpC_OE	9193	1835	0.199608
230721_DMI4_11_R3D_D3D_PRJ.tif	10	230721_DMI4_11_R3D_D3D_PRJ.tif10	CpC_OE	5061	1103	0.217941
230727_DMI8_12_R3D_D3D_PRJ.tif	10	230727_DMI8_12_R3D_D3D_PRJ.tif10	CpC_OE	11762	2964	0.251998
230727_DMI8_06_R3D_D3D_PRJ.tif	10	230727_DMI8_06_R3D_D3D_PRJ.tif10	CpC_OE	9400	2446	0.260213
230721_DMI3_6_R3D_D3D_PRJ.tif	10	230721_DMI3_6_R3D_D3D_PRJ.tif10	CpC_OE	2616	693	0.264908
230727_DMI8_19_R3D_D3D_PRJ.tif	10	230727_DMI8_19_R3D_D3D_PRJ.tif10	CpC_OE	12572	3408	0.271079
230721_DMI3_3_R3D_D3D_PRJ.tif	10	230721_DMI3_3_R3D_D3D_PRJ.tif10	CpC_OE	4938	1380	0.279465
230721_DMI4_19_R3D_D3D_PRJ.tif	10	230721_DMI4_19_R3D_D3D_PRJ.tif10	CpC_OE	13491	3808	0.282262
230721_DMI4_20_R3D_D3D_PRJ.tif	10	230721_DMI4_20_R3D_D3D_PRJ.tif10	CpC_OE	2625	784	0.298667
230721_DMI4_16_R3D_D3D_PRJ.tif	10	230721_DMI4_16_R3D_D3D_PRJ.tif10	CpC_OE	2187	658	0.300869
230719_DMI3_7_R3D_D3D_PRJ.tif	10	230719_DMI3_7_R3D_D3D_PRJ.tif10	CpC_OE	7639	2323	0.304097
230719_DMI4_2_R3D_D3D_PRJ.tif	10	230719_DMI4_2_R3D_D3D_PRJ.tif10	CpC_OE	22096	6803	0.307884
230727_DMI8_16_R3D_D3D_PRJ.tif	10	230727_DMI8_16_R3D_D3D_PRJ.tif10	CpC_OE	7179	2492	0.347124
230719_DMI3_9_R3D_D3D_PRJ.tif	11	230719_DMI3_9_R3D_D3D_PRJ.tif11	CpC_OE	17332	223	0.0128664
230719_DMI3_4_R3D_D3D_PRJ.tif	11	230719_DMI3_4_R3D_D3D_PRJ.tif11	CpC_OE	23034	365	0.0158461
230721_DMI4_17_R3D_D3D_PRJ.tif	11	230721_DMI4_17_R3D_D3D_PRJ.tif11	CpC_OE	10498	187	0.0178129
230721_DMI3_14_R3D_D3D_PRJ.tif	11	230721_DMI3_14_R3D_D3D_PRJ.tif11	CpC_OE	19982	382	0.0191172
230721_DMI3_22_R3D_D3D_PRJ.tif	11	230721_DMI3_22_R3D_D3D_PRJ.tif11	CpC_OE	10767	244	0.0226618
230721_DMI3_13_R3D_D3D_PRJ.tif	11	230721_DMI3_13_R3D_D3D_PRJ.tif11	CpC_OE	18971	485	0.0255653
230727_DMI8_03_R3D_D3D_PRJ.tif	11	230727_DMI8_03_R3D_D3D_PRJ.tif11	CpC_OE	15844	466	0.0294118
230719_DMI3_8_R3D_D3D_PRJ.tif	11	230719_DMI3_8_R3D_D3D_PRJ.tif11	CpC_OE	17783	556	0.0312658
230727_DMI8_04_R3D_D3D_PRJ.tif	11	230727_DMI8_04_R3D_D3D_PRJ.tif11	CpC_OE	6840	218	0.0318713
230721_DMI4_13_R3D_D3D_PRJ.tif	11	230721_DMI4_13_R3D_D3D_PRJ.tif11	CpC_OE	10009	327	0.0326706
230719_DMI3_1_R3D_D3D_PRJ.tif	11	230719_DMI3_1_R3D_D3D_PRJ.tif11	CpC_OE	16062	526	0.0327481
230719_DMI4_8_R3D_D3D_PRJ.tif	11	230719_DMI4_8_R3D_D3D_PRJ.tif11	CpC_OE	10326	357	0.0345729
230721_DMI3_12_R3D_D3D_PRJ.tif	11	230721_DMI3_12_R3D_D3D_PRJ.tif11	CpC_OE	12952	508	0.0392217
230727_DMI8_11_R3D_D3D_PRJ.tif	11	230727_DMI8_11_R3D_D3D_PRJ.tif11	CpC_OE	25272	1043	0.041271
230727_DMI8_06_R3D_D3D_PRJ.tif	11	230727_DMI8_06_R3D_D3D_PRJ.tif11	CpC_OE	14061	617	0.0438802
230721_DMI3_11_R3D_D3D_PRJ.tif	11	230721_DMI3_11_R3D_D3D_PRJ.tif11	CpC_OE	20090	915	0.045545
230719_DMI3_5_R3D_D3D_PRJ.tif	11	230719_DMI3_5_R3D_D3D_PRJ.tif11	CpC_OE	19837	969	0.0488481
230721_DMI4_5_R3D_D3D_PRJ.tif	11	230721_DMI4_5_R3D_D3D_PRJ.tif11	CpC_OE	8831	433	0.0490318
230721_DMI3_8_R3D_D3D_PRJ.tif	11	230721_DMI3_8_R3D_D3D_PRJ.tif11	CpC_OE	6331	322	0.0508608
230721_DMI3_2_R3D_D3D_PRJ.tif	11	230721_DMI3_2_R3D_D3D_PRJ.tif11	CpC_OE	13231	693	0.052377
230719_DMI4_4_R3D_D3D_PRJ.tif	11	230719_DMI4_4_R3D_D3D_PRJ.tif11	CpC_OE	21093	1124	0.0532878
230727_DMI8_16_R3D_D3D_PRJ.tif	11	230727_DMI8_16_R3D_D3D_PRJ.tif11	CpC_OE	7890	426	0.0539924
230721_DMI4_9_R3D_D3D_PRJ.tif	11	230721_DMI4_9_R3D_D3D_PRJ.tif11	CpC_OE	4183	249	0.0595267
230721_DMI4_21_R3D_D3D_PRJ.tif	11	230721_DMI4_21_R3D_D3D_PRJ.tif11	CpC_OE	16078	1009	0.0627566
230719_DMI4_7_R3D_D3D_PRJ.tif	11	230719_DMI4_7_R3D_D3D_PRJ.tif11	CpC_OE	8953	628	0.0701441
230721_DMI4_4_R3D_D3D_PRJ.tif	11	230721_DMI4_4_R3D_D3D_PRJ.tif11	CpC_OE	24220	1920	0.0792733
230719_DMI3_3_R3D_D3D_PRJ.tif	11	230719_DMI3_3_R3D_D3D_PRJ.tif11	CpC_OE	6353	518	0.0815363
230727_DMI8_17_R3D_D3D_PRJ.tif	11	230727_DMI8_17_R3D_D3D_PRJ.tif11	CpC_OE	6037	527	0.087295
230727_DMI8_18_R3D_D3D_PRJ.tif	11	230727_DMI8_18_R3D_D3D_PRJ.tif11	CpC_OE	19661	1987	0.101063
230721_DMI3_18_R3D_D3D_PRJ.tif	11	230721_DMI3_18_R3D_D3D_PRJ.tif11	CpC_OE	5748	598	0.104036
230727_DMI8_13_R3D_D3D_PRJ.tif	11	230727_DMI8_13_R3D_D3D_PRJ.tif11	CpC_OE	12281	1294	0.105366
230721_DMI3_10_R3D_D3D_PRJ.tif	11	230721_DMI3_10_R3D_D3D_PRJ.tif11	CpC_OE	5462	608	0.111315
230721_DMI3_7_R3D_D3D_PRJ.tif	11	230721_DMI3_7_R3D_D3D_PRJ.tif11	CpC_OE	4821	545	0.113047
230719_DMI3_6_R3D_D3D_PRJ.tif	11	230719_DMI3_6_R3D_D3D_PRJ.tif11	CpC_OE	22945	2640	0.115058
230727_DMI8_15_R3D_D3D_PRJ.tif	11	230727_DMI8_15_R3D_D3D_PRJ.tif11	CpC_OE	13412	1582	0.117954
230721_DMI3_25_R3D_D3D_PRJ.tif	11	230721_DMI3_25_R3D_D3D_PRJ.tif11	CpC_OE	4011	488	0.121665
230721_DMI3_23_R3D_D3D_PRJ.tif	11	230721_DMI3_23_R3D_D3D_PRJ.tif11	CpC_OE	5360	724	0.135075
230721_DMI4_7_R3D_D3D_PRJ.tif	11	230721_DMI4_7_R3D_D3D_PRJ.tif11	CpC_OE	4888	690	0.141162
230721_DMI3_21_R3D_D3D_PRJ.tif	11	230721_DMI3_21_R3D_D3D_PRJ.tif11	CpC_OE	3216	459	0.142724
230719_DMI3_2_R3D_D3D_PRJ.tif	11	230719_DMI3_2_R3D_D3D_PRJ.tif11	CpC_OE	17418	2661	0.152773
230721_DMI3_17_R3D_D3D_PRJ.tif	11	230721_DMI3_17_R3D_D3D_PRJ.tif11	CpC_OE	3902	604	0.154792
230721_DMI4_12_R3D_D3D_PRJ.tif	11	230721_DMI4_12_R3D_D3D_PRJ.tif11	CpC_OE	6264	986	0.157407
230721_DMI4_16_R3D_D3D_PRJ.tif	11	230721_DMI4_16_R3D_D3D_PRJ.tif11	CpC_OE	4506	799	0.177319
230727_DMI8_10_R3D_D3D_PRJ.tif	11	230727_DMI8_10_R3D_D3D_PRJ.tif11	CpC_OE	8748	1562	0.178555
230721_DMI4_6_R3D_D3D_PRJ.tif	11	230721_DMI4_6_R3D_D3D_PRJ.tif11	CpC_OE	4975	950	0.190955
230721_DMI3_9_R3D_D3D_PRJ.tif	11	230721_DMI3_9_R3D_D3D_PRJ.tif11	CpC_OE	6282	1210	0.192614
230721_DMI3_16_R3D_D3D_PRJ.tif	11	230721_DMI3_16_R3D_D3D_PRJ.tif11	CpC_OE	4645	895	0.19268
230721_DMI3_6_R3D_D3D_PRJ.tif	11	230721_DMI3_6_R3D_D3D_PRJ.tif11	CpC_OE	5318	1058	0.198947
230721_DMI3_1_R3D_D3D_PRJ.tif	11	230721_DMI3_1_R3D_D3D_PRJ.tif11	CpC_OE	7630	1586	0.207864
230721_DMI4_22_R3D_D3D_PRJ.tif	11	230721_DMI4_22_R3D_D3D_PRJ.tif11	CpC_OE	5853	1251	0.213737
230719_DMI4_3_R3D_D3D_PRJ.tif	11	230719_DMI4_3_R3D_D3D_PRJ.tif11	CpC_OE	5626	1238	0.22005
230727_DMI8_07_R3D_D3D_PRJ.tif	11	230727_DMI8_07_R3D_D3D_PRJ.tif11	CpC_OE	3438	767	0.223095
230727_DMI8_19_R3D_D3D_PRJ.tif	11	230727_DMI8_19_R3D_D3D_PRJ.tif11	CpC_OE	3763	851	0.226149
230721_DMI4_10_R3D_D3D_PRJ.tif	11	230721_DMI4_10_R3D_D3D_PRJ.tif11	CpC_OE	5916	1343	0.227011
230727_DMI8_20_R3D_D3D_PRJ.tif	11	230727_DMI8_20_R3D_D3D_PRJ.tif11	CpC_OE	7322	1797	0.245425
230721_DMI4_20_R3D_D3D_PRJ.tif	11	230721_DMI4_20_R3D_D3D_PRJ.tif11	CpC_OE	7919	1959	0.24738
230727_DMI8_12_R3D_D3D_PRJ.tif	11	230727_DMI8_12_R3D_D3D_PRJ.tif11	CpC_OE	8879	2236	0.25183
230727_DMI8_02_R3D_D3D_PRJ.tif	11	230727_DMI8_02_R3D_D3D_PRJ.tif11	CpC_OE	5293	1595	0.301341
230727_DMI8_01_R3D_D3D_PRJ.tif	11	230727_DMI8_01_R3D_D3D_PRJ.tif11	CpC_OE	5270	1691	0.320873
230721_DMI4_19_R3D_D3D_PRJ.tif	11	230721_DMI4_19_R3D_D3D_PRJ.tif11	CpC_OE	10279	3434	0.334079
230721_DMI4_11_R3D_D3D_PRJ.tif	11	230721_DMI4_11_R3D_D3D_PRJ.tif11	CpC_OE	10532	3614	0.343145
230721_DMI3_4_R3D_D3D_PRJ.tif	11	230721_DMI3_4_R3D_D3D_PRJ.tif11	CpC_OE	10434	3703	0.354897
230719_DMI3_9_R3D_D3D_PRJ.tif	12	230719_DMI3_9_R3D_D3D_PRJ.tif12	CpC_OE	9450	128	0.013545
230719_DMI3_4_R3D_D3D_PRJ.tif	12	230719_DMI3_4_R3D_D3D_PRJ.tif12	CpC_OE	23679	495	0.0209046
230721_DMI3_18_R3D_D3D_PRJ.tif	12	230721_DMI3_18_R3D_D3D_PRJ.tif12	CpC_OE	9448	264	0.0279424
230721_DMI3_12_R3D_D3D_PRJ.tif	12	230721_DMI3_12_R3D_D3D_PRJ.tif12	CpC_OE	11349	345	0.0303992
230719_DMI3_8_R3D_D3D_PRJ.tif	12	230719_DMI3_8_R3D_D3D_PRJ.tif12	CpC_OE	9294	301	0.0323865
230719_DMI3_1_R3D_D3D_PRJ.tif	12	230719_DMI3_1_R3D_D3D_PRJ.tif12	CpC_OE	8702	330	0.0379223
230721_DMI3_15_R3D_D3D_PRJ.tif	12	230721_DMI3_15_R3D_D3D_PRJ.tif12	CpC_OE	15716	677	0.0430771
230719_DMI3_5_R3D_D3D_PRJ.tif	12	230719_DMI3_5_R3D_D3D_PRJ.tif12	CpC_OE	31613	1488	0.0470692
230721_DMI3_25_R3D_D3D_PRJ.tif	12	230721_DMI3_25_R3D_D3D_PRJ.tif12	CpC_OE	7060	333	0.0471671
230721_DMI4_7_R3D_D3D_PRJ.tif	12	230721_DMI4_7_R3D_D3D_PRJ.tif12	CpC_OE	6054	300	0.049554
230721_DMI3_8_R3D_D3D_PRJ.tif	12	230721_DMI3_8_R3D_D3D_PRJ.tif12	CpC_OE	12617	628	0.0497741
230719_DMI4_8_R3D_D3D_PRJ.tif	12	230719_DMI4_8_R3D_D3D_PRJ.tif12	CpC_OE	11434	579	0.0506384
230721_DMI4_5_R3D_D3D_PRJ.tif	12	230721_DMI4_5_R3D_D3D_PRJ.tif12	CpC_OE	7204	386	0.0535813
230721_DMI3_17_R3D_D3D_PRJ.tif	12	230721_DMI3_17_R3D_D3D_PRJ.tif12	CpC_OE	12338	674	0.054628
230721_DMI3_13_R3D_D3D_PRJ.tif	12	230721_DMI3_13_R3D_D3D_PRJ.tif12	CpC_OE	16341	1005	0.0615017
230721_DMI4_13_R3D_D3D_PRJ.tif	12	230721_DMI4_13_R3D_D3D_PRJ.tif12	CpC_OE	8908	563	0.0632016
230721_DMI3_11_R3D_D3D_PRJ.tif	12	230721_DMI3_11_R3D_D3D_PRJ.tif12	CpC_OE	6803	437	0.0642364
230721_DMI3_23_R3D_D3D_PRJ.tif	12	230721_DMI3_23_R3D_D3D_PRJ.tif12	CpC_OE	10074	654	0.0649196
230719_DMI4_4_R3D_D3D_PRJ.tif	12	230719_DMI4_4_R3D_D3D_PRJ.tif12	CpC_OE	10700	748	0.0699065
230727_DMI8_17_R3D_D3D_PRJ.tif	12	230727_DMI8_17_R3D_D3D_PRJ.tif12	CpC_OE	8220	575	0.0699513
230721_DMI3_7_R3D_D3D_PRJ.tif	12	230721_DMI3_7_R3D_D3D_PRJ.tif12	CpC_OE	9596	678	0.0706544
230721_DMI3_16_R3D_D3D_PRJ.tif	12	230721_DMI3_16_R3D_D3D_PRJ.tif12	CpC_OE	12187	900	0.0738492
230721_DMI3_22_R3D_D3D_PRJ.tif	12	230721_DMI3_22_R3D_D3D_PRJ.tif12	CpC_OE	7273	604	0.0830469
230727_DMI8_16_R3D_D3D_PRJ.tif	12	230727_DMI8_16_R3D_D3D_PRJ.tif12	CpC_OE	10437	887	0.0849861
230727_DMI8_18_R3D_D3D_PRJ.tif	12	230727_DMI8_18_R3D_D3D_PRJ.tif12	CpC_OE	19693	1872	0.0950592
230721_DMI4_4_R3D_D3D_PRJ.tif	12	230721_DMI4_4_R3D_D3D_PRJ.tif12	CpC_OE	5486	537	0.0978855
230727_DMI8_04_R3D_D3D_PRJ.tif	12	230727_DMI8_04_R3D_D3D_PRJ.tif12	CpC_OE	11815	1172	0.0991959
230721_DMI4_16_R3D_D3D_PRJ.tif	12	230721_DMI4_16_R3D_D3D_PRJ.tif12	CpC_OE	2612	275	0.105283
230721_DMI4_21_R3D_D3D_PRJ.tif	12	230721_DMI4_21_R3D_D3D_PRJ.tif12	CpC_OE	16573	1780	0.107404
230721_DMI3_2_R3D_D3D_PRJ.tif	12	230721_DMI3_2_R3D_D3D_PRJ.tif12	CpC_OE	7808	848	0.108607
230719_DMI4_7_R3D_D3D_PRJ.tif	12	230719_DMI4_7_R3D_D3D_PRJ.tif12	CpC_OE	20230	2200	0.108749
230721_DMI4_17_R3D_D3D_PRJ.tif	12	230721_DMI4_17_R3D_D3D_PRJ.tif12	CpC_OE	3299	372	0.112761
230727_DMI8_12_R3D_D3D_PRJ.tif	12	230727_DMI8_12_R3D_D3D_PRJ.tif12	CpC_OE	8490	1025	0.12073
230721_DMI4_9_R3D_D3D_PRJ.tif	12	230721_DMI4_9_R3D_D3D_PRJ.tif12	CpC_OE	4601	567	0.123234
230719_DMI4_3_R3D_D3D_PRJ.tif	12	230719_DMI4_3_R3D_D3D_PRJ.tif12	CpC_OE	9708	1280	0.13185
230727_DMI8_13_R3D_D3D_PRJ.tif	12	230727_DMI8_13_R3D_D3D_PRJ.tif12	CpC_OE	11656	1641	0.140786
230727_DMI8_01_R3D_D3D_PRJ.tif	12	230727_DMI8_01_R3D_D3D_PRJ.tif12	CpC_OE	12587	1831	0.145468
230721_DMI3_4_R3D_D3D_PRJ.tif	12	230721_DMI3_4_R3D_D3D_PRJ.tif12	CpC_OE	23220	3545	0.15267
230727_DMI8_06_R3D_D3D_PRJ.tif	12	230727_DMI8_06_R3D_D3D_PRJ.tif12	CpC_OE	8339	1275	0.152896
230721_DMI4_22_R3D_D3D_PRJ.tif	12	230721_DMI4_22_R3D_D3D_PRJ.tif12	CpC_OE	4587	729	0.158927
230721_DMI4_12_R3D_D3D_PRJ.tif	12	230721_DMI4_12_R3D_D3D_PRJ.tif12	CpC_OE	4963	806	0.162402
230721_DMI4_19_R3D_D3D_PRJ.tif	12	230721_DMI4_19_R3D_D3D_PRJ.tif12	CpC_OE	11997	2044	0.170376
230727_DMI8_08_R3D_D3D_PRJ.tif	12	230727_DMI8_08_R3D_D3D_PRJ.tif12	CpC_OE	4257	743	0.174536
230721_DMI3_3_R3D_D3D_PRJ.tif	12	230721_DMI3_3_R3D_D3D_PRJ.tif12	CpC_OE	16964	3039	0.179144
230719_DMI3_6_R3D_D3D_PRJ.tif	12	230719_DMI3_6_R3D_D3D_PRJ.tif12	CpC_OE	21009	4028	0.191727
230719_DMI3_3_R3D_D3D_PRJ.tif	12	230719_DMI3_3_R3D_D3D_PRJ.tif12	CpC_OE	8356	1654	0.197942
230721_DMI4_6_R3D_D3D_PRJ.tif	12	230721_DMI4_6_R3D_D3D_PRJ.tif12	CpC_OE	7448	1507	0.202336
230721_DMI4_10_R3D_D3D_PRJ.tif	12	230721_DMI4_10_R3D_D3D_PRJ.tif12	CpC_OE	11311	2390	0.211299
230721_DMI3_14_R3D_D3D_PRJ.tif	12	230721_DMI3_14_R3D_D3D_PRJ.tif12	CpC_OE	6422	1358	0.211461
230721_DMI3_1_R3D_D3D_PRJ.tif	12	230721_DMI3_1_R3D_D3D_PRJ.tif12	CpC_OE	13801	3159	0.228896
230721_DMI4_20_R3D_D3D_PRJ.tif	12	230721_DMI4_20_R3D_D3D_PRJ.tif12	CpC_OE	6541	1616	0.247057
230727_DMI8_20_R3D_D3D_PRJ.tif	12	230727_DMI8_20_R3D_D3D_PRJ.tif12	CpC_OE	7209	1816	0.251907
230719_DMI4_1_R3D_D3D_PRJ.tif	12	230719_DMI4_1_R3D_D3D_PRJ.tif12	CpC_OE	26558	7181	0.270389
230721_DMI3_10_R3D_D3D_PRJ.tif	12	230721_DMI3_10_R3D_D3D_PRJ.tif12	CpC_OE	6050	1731	0.286116
230719_DMI3_2_R3D_D3D_PRJ.tif	12	230719_DMI3_2_R3D_D3D_PRJ.tif12	CpC_OE	4397	1286	0.292472
230727_DMI8_03_R3D_D3D_PRJ.tif	12	230727_DMI8_03_R3D_D3D_PRJ.tif12	CpC_OE	8655	2701	0.312074
230727_DMI8_11_R3D_D3D_PRJ.tif	12	230727_DMI8_11_R3D_D3D_PRJ.tif12	CpC_OE	7837	2493	0.318106
230727_DMI8_15_R3D_D3D_PRJ.tif	12	230727_DMI8_15_R3D_D3D_PRJ.tif12	CpC_OE	6163	2020	0.327762
230727_DMI8_07_R3D_D3D_PRJ.tif	12	230727_DMI8_07_R3D_D3D_PRJ.tif12	CpC_OE	3739	1306	0.349291
230719_DMI4_7_R3D_D3D_PRJ.tif	13	230719_DMI4_7_R3D_D3D_PRJ.tif13	CpC_OE	16754	449	0.0267996
230719_DMI3_9_R3D_D3D_PRJ.tif	13	230719_DMI3_9_R3D_D3D_PRJ.tif13	CpC_OE	7953	245	0.030806
230721_DMI3_25_R3D_D3D_PRJ.tif	13	230721_DMI3_25_R3D_D3D_PRJ.tif13	CpC_OE	9230	305	0.0330444
230721_DMI4_5_R3D_D3D_PRJ.tif	13	230721_DMI4_5_R3D_D3D_PRJ.tif13	CpC_OE	25073	882	0.0351773
230719_DMI3_1_R3D_D3D_PRJ.tif	13	230719_DMI3_1_R3D_D3D_PRJ.tif13	CpC_OE	9807	375	0.038238
230727_DMI8_07_R3D_D3D_PRJ.tif	13	230727_DMI8_07_R3D_D3D_PRJ.tif13	CpC_OE	13725	635	0.0462659
230719_DMI3_3_R3D_D3D_PRJ.tif	13	230719_DMI3_3_R3D_D3D_PRJ.tif13	CpC_OE	11095	530	0.0477693
230721_DMI4_10_R3D_D3D_PRJ.tif	13	230721_DMI4_10_R3D_D3D_PRJ.tif13	CpC_OE	8265	404	0.0488808
230719_DMI4_8_R3D_D3D_PRJ.tif	13	230719_DMI4_8_R3D_D3D_PRJ.tif13	CpC_OE	7052	370	0.0524674
230719_DMI3_6_R3D_D3D_PRJ.tif	13	230719_DMI3_6_R3D_D3D_PRJ.tif13	CpC_OE	28898	1553	0.0537407
230727_DMI8_06_R3D_D3D_PRJ.tif	13	230727_DMI8_06_R3D_D3D_PRJ.tif13	CpC_OE	10740	583	0.0542831
230721_DMI3_2_R3D_D3D_PRJ.tif	13	230721_DMI3_2_R3D_D3D_PRJ.tif13	CpC_OE	8420	467	0.0554632
230721_DMI3_17_R3D_D3D_PRJ.tif	13	230721_DMI3_17_R3D_D3D_PRJ.tif13	CpC_OE	11498	652	0.0567055
230719_DMI3_4_R3D_D3D_PRJ.tif	13	230719_DMI3_4_R3D_D3D_PRJ.tif13	CpC_OE	10155	619	0.0609552
230719_DMI4_4_R3D_D3D_PRJ.tif	13	230719_DMI4_4_R3D_D3D_PRJ.tif13	CpC_OE	18936	1173	0.0619455
230721_DMI3_16_R3D_D3D_PRJ.tif	13	230721_DMI3_16_R3D_D3D_PRJ.tif13	CpC_OE	11010	696	0.0632153
230719_DMI3_8_R3D_D3D_PRJ.tif	13	230719_DMI3_8_R3D_D3D_PRJ.tif13	CpC_OE	7313	510	0.0697388
230721_DMI4_13_R3D_D3D_PRJ.tif	13	230721_DMI4_13_R3D_D3D_PRJ.tif13	CpC_OE	9599	684	0.0712574
230727_DMI8_04_R3D_D3D_PRJ.tif	13	230727_DMI8_04_R3D_D3D_PRJ.tif13	CpC_OE	4734	345	0.0728771
230727_DMI8_15_R3D_D3D_PRJ.tif	13	230727_DMI8_15_R3D_D3D_PRJ.tif13	CpC_OE	12622	988	0.078276
230721_DMI3_8_R3D_D3D_PRJ.tif	13	230721_DMI3_8_R3D_D3D_PRJ.tif13	CpC_OE	6966	548	0.0786678
230721_DMI4_7_R3D_D3D_PRJ.tif	13	230721_DMI4_7_R3D_D3D_PRJ.tif13	CpC_OE	6528	530	0.0811887
230721_DMI3_3_R3D_D3D_PRJ.tif	13	230721_DMI3_3_R3D_D3D_PRJ.tif13	CpC_OE	16882	1455	0.0861865
230721_DMI3_18_R3D_D3D_PRJ.tif	13	230721_DMI3_18_R3D_D3D_PRJ.tif13	CpC_OE	8163	726	0.0889379
230727_DMI8_13_R3D_D3D_PRJ.tif	13	230727_DMI8_13_R3D_D3D_PRJ.tif13	CpC_OE	5493	493	0.0897506
230719_DMI3_5_R3D_D3D_PRJ.tif	13	230719_DMI3_5_R3D_D3D_PRJ.tif13	CpC_OE	22109	1988	0.0899181
230721_DMI3_11_R3D_D3D_PRJ.tif	13	230721_DMI3_11_R3D_D3D_PRJ.tif13	CpC_OE	4326	396	0.0915395
230727_DMI8_02_R3D_D3D_PRJ.tif	13	230727_DMI8_02_R3D_D3D_PRJ.tif13	CpC_OE	8498	825	0.0970817
230721_DMI4_6_R3D_D3D_PRJ.tif	13	230721_DMI4_6_R3D_D3D_PRJ.tif13	CpC_OE	10967	1086	0.0990243
230721_DMI4_16_R3D_D3D_PRJ.tif	13	230721_DMI4_16_R3D_D3D_PRJ.tif13	CpC_OE	5380	585	0.108736
230727_DMI8_11_R3D_D3D_PRJ.tif	13	230727_DMI8_11_R3D_D3D_PRJ.tif13	CpC_OE	10748	1172	0.109044
230719_DMI4_3_R3D_D3D_PRJ.tif	13	230719_DMI4_3_R3D_D3D_PRJ.tif13	CpC_OE	11836	1324	0.111862
230719_DMI3_2_R3D_D3D_PRJ.tif	13	230719_DMI3_2_R3D_D3D_PRJ.tif13	CpC_OE	7141	800	0.112029
230727_DMI8_16_R3D_D3D_PRJ.tif	13	230727_DMI8_16_R3D_D3D_PRJ.tif13	CpC_OE	13112	1480	0.112874
230721_DMI4_9_R3D_D3D_PRJ.tif	13	230721_DMI4_9_R3D_D3D_PRJ.tif13	CpC_OE	10348	1225	0.11838
230721_DMI4_21_R3D_D3D_PRJ.tif	13	230721_DMI4_21_R3D_D3D_PRJ.tif13	CpC_OE	10872	1289	0.118561
230721_DMI3_21_R3D_D3D_PRJ.tif	13	230721_DMI3_21_R3D_D3D_PRJ.tif13	CpC_OE	5038	606	0.120286
230727_DMI8_10_R3D_D3D_PRJ.tif	13	230727_DMI8_10_R3D_D3D_PRJ.tif13	CpC_OE	8640	1161	0.134375
230721_DMI3_12_R3D_D3D_PRJ.tif	13	230721_DMI3_12_R3D_D3D_PRJ.tif13	CpC_OE	16490	2224	0.13487
230721_DMI3_7_R3D_D3D_PRJ.tif	13	230721_DMI3_7_R3D_D3D_PRJ.tif13	CpC_OE	4048	576	0.142292
230721_DMI4_22_R3D_D3D_PRJ.tif	13	230721_DMI4_22_R3D_D3D_PRJ.tif13	CpC_OE	11023	1627	0.1476
230721_DMI3_10_R3D_D3D_PRJ.tif	13	230721_DMI3_10_R3D_D3D_PRJ.tif13	CpC_OE	5082	808	0.158993
230721_DMI3_22_R3D_D3D_PRJ.tif	13	230721_DMI3_22_R3D_D3D_PRJ.tif13	CpC_OE	2556	419	0.163928
230727_DMI8_08_R3D_D3D_PRJ.tif	13	230727_DMI8_08_R3D_D3D_PRJ.tif13	CpC_OE	4388	723	0.164768
230727_DMI8_01_R3D_D3D_PRJ.tif	13	230727_DMI8_01_R3D_D3D_PRJ.tif13	CpC_OE	8829	1773	0.200815
230721_DMI4_17_R3D_D3D_PRJ.tif	13	230721_DMI4_17_R3D_D3D_PRJ.tif13	CpC_OE	4108	829	0.201801
230719_DMI4_2_R3D_D3D_PRJ.tif	13	230719_DMI4_2_R3D_D3D_PRJ.tif13	CpC_OE	7501	1690	0.225303
230721_DMI3_4_R3D_D3D_PRJ.tif	13	230721_DMI3_4_R3D_D3D_PRJ.tif13	CpC_OE	13950	3253	0.23319
230721_DMI3_23_R3D_D3D_PRJ.tif	13	230721_DMI3_23_R3D_D3D_PRJ.tif13	CpC_OE	4221	1022	0.242123
230721_DMI4_11_R3D_D3D_PRJ.tif	13	230721_DMI4_11_R3D_D3D_PRJ.tif13	CpC_OE	6859	1672	0.243767
230721_DMI4_4_R3D_D3D_PRJ.tif	13	230721_DMI4_4_R3D_D3D_PRJ.tif13	CpC_OE	5795	1541	0.265919
230721_DMI4_14_R3D_D3D_PRJ.tif	13	230721_DMI4_14_R3D_D3D_PRJ.tif13	CpC_OE	9894	2642	0.267031
230727_DMI8_03_R3D_D3D_PRJ.tif	13	230727_DMI8_03_R3D_D3D_PRJ.tif13	CpC_OE	7086	2262	0.319221
230727_DMI8_12_R3D_D3D_PRJ.tif	13	230727_DMI8_12_R3D_D3D_PRJ.tif13	CpC_OE	5951	1979	0.332549
230727_DMI8_17_R3D_D3D_PRJ.tif	13	230727_DMI8_17_R3D_D3D_PRJ.tif13	CpC_OE	5112	1733	0.339006
230721_DMI3_13_R3D_D3D_PRJ.tif	13	230721_DMI3_13_R3D_D3D_PRJ.tif13	CpC_OE	1533	554	0.361383
230721_DMI3_6_R3D_D3D_PRJ.tif	13	230721_DMI3_6_R3D_D3D_PRJ.tif13	CpC_OE	4040	1521	0.376485
230721_DMI4_9_R3D_D3D_PRJ.tif	14	230721_DMI4_9_R3D_D3D_PRJ.tif14	CpC_OE	20765	332	0.0159884
230719_DMI4_4_R3D_D3D_PRJ.tif	14	230719_DMI4_4_R3D_D3D_PRJ.tif14	CpC_OE	23918	411	0.0171837
230721_DMI3_12_R3D_D3D_PRJ.tif	14	230721_DMI3_12_R3D_D3D_PRJ.tif14	CpC_OE	18097	346	0.0191192
230719_DMI3_4_R3D_D3D_PRJ.tif	14	230719_DMI3_4_R3D_D3D_PRJ.tif14	CpC_OE	15197	307	0.0202014
230727_DMI8_04_R3D_D3D_PRJ.tif	14	230727_DMI8_04_R3D_D3D_PRJ.tif14	CpC_OE	17720	372	0.0209932
230721_DMI3_13_R3D_D3D_PRJ.tif	14	230721_DMI3_13_R3D_D3D_PRJ.tif14	CpC_OE	20496	476	0.023224
230719_DMI3_9_R3D_D3D_PRJ.tif	14	230719_DMI3_9_R3D_D3D_PRJ.tif14	CpC_OE	6040	147	0.0243377
230719_DMI3_1_R3D_D3D_PRJ.tif	14	230719_DMI3_1_R3D_D3D_PRJ.tif14	CpC_OE	10905	272	0.0249427
230727_DMI8_13_R3D_D3D_PRJ.tif	14	230727_DMI8_13_R3D_D3D_PRJ.tif14	CpC_OE	13249	342	0.0258133
230721_DMI3_17_R3D_D3D_PRJ.tif	14	230721_DMI3_17_R3D_D3D_PRJ.tif14	CpC_OE	13833	359	0.0259524
230721_DMI3_16_R3D_D3D_PRJ.tif	14	230721_DMI3_16_R3D_D3D_PRJ.tif14	CpC_OE	40723	1084	0.0266189
230721_DMI3_11_R3D_D3D_PRJ.tif	14	230721_DMI3_11_R3D_D3D_PRJ.tif14	CpC_OE	13471	372	0.0276149
230721_DMI3_8_R3D_D3D_PRJ.tif	14	230721_DMI3_8_R3D_D3D_PRJ.tif14	CpC_OE	17522	530	0.0302477
230721_DMI3_25_R3D_D3D_PRJ.tif	14	230721_DMI3_25_R3D_D3D_PRJ.tif14	CpC_OE	12455	431	0.0346046
230721_DMI3_18_R3D_D3D_PRJ.tif	14	230721_DMI3_18_R3D_D3D_PRJ.tif14	CpC_OE	19778	696	0.0351906
230727_DMI8_06_R3D_D3D_PRJ.tif	14	230727_DMI8_06_R3D_D3D_PRJ.tif14	CpC_OE	11507	468	0.0406709
230719_DMI4_8_R3D_D3D_PRJ.tif	14	230719_DMI4_8_R3D_D3D_PRJ.tif14	CpC_OE	10614	471	0.0443754
230719_DMI4_3_R3D_D3D_PRJ.tif	14	230719_DMI4_3_R3D_D3D_PRJ.tif14	CpC_OE	21589	1269	0.0587799
230719_DMI3_8_R3D_D3D_PRJ.tif	14	230719_DMI3_8_R3D_D3D_PRJ.tif14	CpC_OE	12911	759	0.0587871
230727_DMI8_15_R3D_D3D_PRJ.tif	14	230727_DMI8_15_R3D_D3D_PRJ.tif14	CpC_OE	4789	333	0.0695343
230721_DMI4_4_R3D_D3D_PRJ.tif	14	230721_DMI4_4_R3D_D3D_PRJ.tif14	CpC_OE	15769	1117	0.0708352
230721_DMI3_3_R3D_D3D_PRJ.tif	14	230721_DMI3_3_R3D_D3D_PRJ.tif14	CpC_OE	10910	774	0.0709441
230721_DMI3_21_R3D_D3D_PRJ.tif	14	230721_DMI3_21_R3D_D3D_PRJ.tif14	CpC_OE	5887	426	0.0723628
230721_DMI4_5_R3D_D3D_PRJ.tif	14	230721_DMI4_5_R3D_D3D_PRJ.tif14	CpC_OE	9716	719	0.0740016
230721_DMI3_22_R3D_D3D_PRJ.tif	14	230721_DMI3_22_R3D_D3D_PRJ.tif14	CpC_OE	9375	730	0.0778667
230721_DMI4_6_R3D_D3D_PRJ.tif	14	230721_DMI4_6_R3D_D3D_PRJ.tif14	CpC_OE	6894	554	0.0803597
230721_DMI3_2_R3D_D3D_PRJ.tif	14	230721_DMI3_2_R3D_D3D_PRJ.tif14	CpC_OE	8877	816	0.0919229
230721_DMI3_10_R3D_D3D_PRJ.tif	14	230721_DMI3_10_R3D_D3D_PRJ.tif14	CpC_OE	8896	850	0.0955486
230721_DMI4_7_R3D_D3D_PRJ.tif	14	230721_DMI4_7_R3D_D3D_PRJ.tif14	CpC_OE	11176	1070	0.0957409
230719_DMI3_2_R3D_D3D_PRJ.tif	14	230719_DMI3_2_R3D_D3D_PRJ.tif14	CpC_OE	7674	788	0.102684
230721_DMI4_16_R3D_D3D_PRJ.tif	14	230721_DMI4_16_R3D_D3D_PRJ.tif14	CpC_OE	6662	755	0.113329
230721_DMI3_1_R3D_D3D_PRJ.tif	14	230721_DMI3_1_R3D_D3D_PRJ.tif14	CpC_OE	16290	1882	0.115531
230727_DMI8_18_R3D_D3D_PRJ.tif	14	230727_DMI8_18_R3D_D3D_PRJ.tif14	CpC_OE	14281	1680	0.117639
230721_DMI4_17_R3D_D3D_PRJ.tif	14	230721_DMI4_17_R3D_D3D_PRJ.tif14	CpC_OE	8413	1017	0.120884
230719_DMI3_6_R3D_D3D_PRJ.tif	14	230719_DMI3_6_R3D_D3D_PRJ.tif14	CpC_OE	24079	2926	0.121517
230721_DMI3_23_R3D_D3D_PRJ.tif	14	230721_DMI3_23_R3D_D3D_PRJ.tif14	CpC_OE	3930	486	0.123664
230721_DMI4_20_R3D_D3D_PRJ.tif	14	230721_DMI4_20_R3D_D3D_PRJ.tif14	CpC_OE	4964	764	0.153908
230727_DMI8_10_R3D_D3D_PRJ.tif	14	230727_DMI8_10_R3D_D3D_PRJ.tif14	CpC_OE	6565	1021	0.155522
230721_DMI4_21_R3D_D3D_PRJ.tif	14	230721_DMI4_21_R3D_D3D_PRJ.tif14	CpC_OE	9121	1447	0.158645
230727_DMI8_03_R3D_D3D_PRJ.tif	14	230727_DMI8_03_R3D_D3D_PRJ.tif14	CpC_OE	4585	739	0.161178
230719_DMI3_3_R3D_D3D_PRJ.tif	14	230719_DMI3_3_R3D_D3D_PRJ.tif14	CpC_OE	4293	706	0.164454
230721_DMI4_13_R3D_D3D_PRJ.tif	14	230721_DMI4_13_R3D_D3D_PRJ.tif14	CpC_OE	7422	1254	0.168957
230721_DMI4_15_R3D_D3D_PRJ.tif	14	230721_DMI4_15_R3D_D3D_PRJ.tif14	CpC_OE	4116	745	0.181001
230719_DMI4_2_R3D_D3D_PRJ.tif	14	230719_DMI4_2_R3D_D3D_PRJ.tif14	CpC_OE	27990	5204	0.185924
230727_DMI8_08_R3D_D3D_PRJ.tif	14	230727_DMI8_08_R3D_D3D_PRJ.tif14	CpC_OE	6078	1138	0.187233
230721_DMI4_10_R3D_D3D_PRJ.tif	14	230721_DMI4_10_R3D_D3D_PRJ.tif14	CpC_OE	8240	1545	0.1875
230721_DMI4_12_R3D_D3D_PRJ.tif	14	230721_DMI4_12_R3D_D3D_PRJ.tif14	CpC_OE	13548	2687	0.198332
230721_DMI3_4_R3D_D3D_PRJ.tif	14	230721_DMI3_4_R3D_D3D_PRJ.tif14	CpC_OE	15222	3244	0.213113
230721_DMI3_7_R3D_D3D_PRJ.tif	14	230721_DMI3_7_R3D_D3D_PRJ.tif14	CpC_OE	4843	1039	0.214536
230721_DMI3_6_R3D_D3D_PRJ.tif	14	230721_DMI3_6_R3D_D3D_PRJ.tif14	CpC_OE	5285	1184	0.22403
230727_DMI8_12_R3D_D3D_PRJ.tif	14	230727_DMI8_12_R3D_D3D_PRJ.tif14	CpC_OE	6259	1520	0.24285
230727_DMI8_16_R3D_D3D_PRJ.tif	14	230727_DMI8_16_R3D_D3D_PRJ.tif14	CpC_OE	7631	1854	0.242956
230721_DMI4_19_R3D_D3D_PRJ.tif	14	230721_DMI4_19_R3D_D3D_PRJ.tif14	CpC_OE	14058	3464	0.246408
230721_DMI3_14_R3D_D3D_PRJ.tif	14	230721_DMI3_14_R3D_D3D_PRJ.tif14	CpC_OE	5693	1453	0.255226
230727_DMI8_19_R3D_D3D_PRJ.tif	14	230727_DMI8_19_R3D_D3D_PRJ.tif14	CpC_OE	6861	1877	0.273575
230727_DMI8_11_R3D_D3D_PRJ.tif	14	230727_DMI8_11_R3D_D3D_PRJ.tif14	CpC_OE	5855	1620	0.276687
230719_DMI3_5_R3D_D3D_PRJ.tif	14	230719_DMI3_5_R3D_D3D_PRJ.tif14	CpC_OE	6959	1966	0.282512
230727_DMI8_07_R3D_D3D_PRJ.tif	14	230727_DMI8_07_R3D_D3D_PRJ.tif14	CpC_OE	5665	1723	0.304148
230721_DMI4_22_R3D_D3D_PRJ.tif	14	230721_DMI4_22_R3D_D3D_PRJ.tif14	CpC_OE	4326	1504	0.347665
230727_DMI8_01_R3D_D3D_PRJ.tif	14	230727_DMI8_01_R3D_D3D_PRJ.tif14	CpC_OE	8092	2954	0.365052
230719_DMI4_7_R3D_D3D_PRJ.tif	14	230719_DMI4_7_R3D_D3D_PRJ.tif14	CpC_OE	2139	786	0.367461
230719_DMI4_7_R3D_D3D_PRJ.tif	15	230719_DMI4_7_R3D_D3D_PRJ.tif15	CpC_OE	10983	251	0.0228535
230719_DMI3_4_R3D_D3D_PRJ.tif	15	230719_DMI3_4_R3D_D3D_PRJ.tif15	CpC_OE	14102	343	0.0243228
230719_DMI3_1_R3D_D3D_PRJ.tif	15	230719_DMI3_1_R3D_D3D_PRJ.tif15	CpC_OE	6608	163	0.0246671
230721_DMI3_17_R3D_D3D_PRJ.tif	15	230721_DMI3_17_R3D_D3D_PRJ.tif15	CpC_OE	17074	471	0.0275858
230719_DMI3_9_R3D_D3D_PRJ.tif	15	230719_DMI3_9_R3D_D3D_PRJ.tif15	CpC_OE	7318	206	0.0281498
230721_DMI3_12_R3D_D3D_PRJ.tif	15	230721_DMI3_12_R3D_D3D_PRJ.tif15	CpC_OE	21375	660	0.0308772
230721_DMI3_18_R3D_D3D_PRJ.tif	15	230721_DMI3_18_R3D_D3D_PRJ.tif15	CpC_OE	21388	689	0.0322143
230719_DMI3_3_R3D_D3D_PRJ.tif	15	230719_DMI3_3_R3D_D3D_PRJ.tif15	CpC_OE	10415	399	0.0383101
230719_DMI4_8_R3D_D3D_PRJ.tif	15	230719_DMI4_8_R3D_D3D_PRJ.tif15	CpC_OE	13163	578	0.043911
230721_DMI3_8_R3D_D3D_PRJ.tif	15	230721_DMI3_8_R3D_D3D_PRJ.tif15	CpC_OE	12534	554	0.0441998
230727_DMI8_04_R3D_D3D_PRJ.tif	15	230727_DMI8_04_R3D_D3D_PRJ.tif15	CpC_OE	16251	727	0.0447357
230719_DMI3_8_R3D_D3D_PRJ.tif	15	230719_DMI3_8_R3D_D3D_PRJ.tif15	CpC_OE	14286	704	0.049279
230721_DMI3_25_R3D_D3D_PRJ.tif	15	230721_DMI3_25_R3D_D3D_PRJ.tif15	CpC_OE	19479	1004	0.0515427
230721_DMI3_16_R3D_D3D_PRJ.tif	15	230721_DMI3_16_R3D_D3D_PRJ.tif15	CpC_OE	15535	843	0.0542646
230721_DMI4_10_R3D_D3D_PRJ.tif	15	230721_DMI4_10_R3D_D3D_PRJ.tif15	CpC_OE	10815	634	0.0586223
230719_DMI3_6_R3D_D3D_PRJ.tif	15	230719_DMI3_6_R3D_D3D_PRJ.tif15	CpC_OE	19693	1209	0.0613924
230727_DMI8_13_R3D_D3D_PRJ.tif	15	230727_DMI8_13_R3D_D3D_PRJ.tif15	CpC_OE	10756	740	0.0687988
230719_DMI3_5_R3D_D3D_PRJ.tif	15	230719_DMI3_5_R3D_D3D_PRJ.tif15	CpC_OE	16191	1212	0.0748564
230721_DMI4_17_R3D_D3D_PRJ.tif	15	230721_DMI4_17_R3D_D3D_PRJ.tif15	CpC_OE	10016	800	0.0798722
230721_DMI4_16_R3D_D3D_PRJ.tif	15	230721_DMI4_16_R3D_D3D_PRJ.tif15	CpC_OE	2943	267	0.0907238
230721_DMI3_22_R3D_D3D_PRJ.tif	15	230721_DMI3_22_R3D_D3D_PRJ.tif15	CpC_OE	4915	486	0.098881
230727_DMI8_11_R3D_D3D_PRJ.tif	15	230727_DMI8_11_R3D_D3D_PRJ.tif15	CpC_OE	12391	1324	0.106852
230721_DMI4_5_R3D_D3D_PRJ.tif	15	230721_DMI4_5_R3D_D3D_PRJ.tif15	CpC_OE	5845	637	0.108982
230721_DMI3_7_R3D_D3D_PRJ.tif	15	230721_DMI3_7_R3D_D3D_PRJ.tif15	CpC_OE	8080	921	0.113985
230721_DMI4_7_R3D_D3D_PRJ.tif	15	230721_DMI4_7_R3D_D3D_PRJ.tif15	CpC_OE	5369	613	0.114174
230721_DMI3_10_R3D_D3D_PRJ.tif	15	230721_DMI3_10_R3D_D3D_PRJ.tif15	CpC_OE	12030	1376	0.114381
230721_DMI3_21_R3D_D3D_PRJ.tif	15	230721_DMI3_21_R3D_D3D_PRJ.tif15	CpC_OE	3485	423	0.121377
230721_DMI3_1_R3D_D3D_PRJ.tif	15	230721_DMI3_1_R3D_D3D_PRJ.tif15	CpC_OE	13052	1654	0.126724
230721_DMI3_14_R3D_D3D_PRJ.tif	15	230721_DMI3_14_R3D_D3D_PRJ.tif15	CpC_OE	7150	928	0.12979
230721_DMI4_22_R3D_D3D_PRJ.tif	15	230721_DMI4_22_R3D_D3D_PRJ.tif15	CpC_OE	7090	923	0.130183
230727_DMI8_03_R3D_D3D_PRJ.tif	15	230727_DMI8_03_R3D_D3D_PRJ.tif15	CpC_OE	4982	662	0.132878
230721_DMI3_6_R3D_D3D_PRJ.tif	15	230721_DMI3_6_R3D_D3D_PRJ.tif15	CpC_OE	7843	1047	0.133495
230719_DMI4_3_R3D_D3D_PRJ.tif	15	230719_DMI4_3_R3D_D3D_PRJ.tif15	CpC_OE	14421	2049	0.142084
230727_DMI8_16_R3D_D3D_PRJ.tif	15	230727_DMI8_16_R3D_D3D_PRJ.tif15	CpC_OE	10251	1492	0.145547
230721_DMI3_4_R3D_D3D_PRJ.tif	15	230721_DMI3_4_R3D_D3D_PRJ.tif15	CpC_OE	22672	3448	0.152082
230727_DMI8_19_R3D_D3D_PRJ.tif	15	230727_DMI8_19_R3D_D3D_PRJ.tif15	CpC_OE	9542	1475	0.15458
230727_DMI8_15_R3D_D3D_PRJ.tif	15	230727_DMI8_15_R3D_D3D_PRJ.tif15	CpC_OE	12133	2001	0.164922
230721_DMI3_11_R3D_D3D_PRJ.tif	15	230721_DMI3_11_R3D_D3D_PRJ.tif15	CpC_OE	4730	788	0.166596
230721_DMI4_21_R3D_D3D_PRJ.tif	15	230721_DMI4_21_R3D_D3D_PRJ.tif15	CpC_OE	14660	2457	0.167599
230721_DMI4_19_R3D_D3D_PRJ.tif	15	230721_DMI4_19_R3D_D3D_PRJ.tif15	CpC_OE	6474	1108	0.171146
230719_DMI3_2_R3D_D3D_PRJ.tif	15	230719_DMI3_2_R3D_D3D_PRJ.tif15	CpC_OE	6477	1111	0.17153
230721_DMI3_2_R3D_D3D_PRJ.tif	15	230721_DMI3_2_R3D_D3D_PRJ.tif15	CpC_OE	4937	878	0.177841
230721_DMI4_4_R3D_D3D_PRJ.tif	15	230721_DMI4_4_R3D_D3D_PRJ.tif15	CpC_OE	6432	1151	0.178949
230719_DMI4_2_R3D_D3D_PRJ.tif	15	230719_DMI4_2_R3D_D3D_PRJ.tif15	CpC_OE	14467	2666	0.184281
230727_DMI8_06_R3D_D3D_PRJ.tif	15	230727_DMI8_06_R3D_D3D_PRJ.tif15	CpC_OE	9832	1935	0.196806
230727_DMI8_12_R3D_D3D_PRJ.tif	15	230727_DMI8_12_R3D_D3D_PRJ.tif15	CpC_OE	6647	1323	0.199037
230727_DMI8_02_R3D_D3D_PRJ.tif	15	230727_DMI8_02_R3D_D3D_PRJ.tif15	CpC_OE	3758	904	0.240553
230721_DMI4_6_R3D_D3D_PRJ.tif	15	230721_DMI4_6_R3D_D3D_PRJ.tif15	CpC_OE	6785	1698	0.250258
230719_DMI4_4_R3D_D3D_PRJ.tif	15	230719_DMI4_4_R3D_D3D_PRJ.tif15	CpC_OE	5980	1518	0.253846
230721_DMI4_12_R3D_D3D_PRJ.tif	15	230721_DMI4_12_R3D_D3D_PRJ.tif15	CpC_OE	5686	1498	0.263454
230721_DMI4_13_R3D_D3D_PRJ.tif	15	230721_DMI4_13_R3D_D3D_PRJ.tif15	CpC_OE	5873	1575	0.268176
230721_DMI3_23_R3D_D3D_PRJ.tif	15	230721_DMI3_23_R3D_D3D_PRJ.tif15	CpC_OE	2236	676	0.302326
230727_DMI8_07_R3D_D3D_PRJ.tif	15	230727_DMI8_07_R3D_D3D_PRJ.tif15	CpC_OE	6570	2023	0.307915
230727_DMI8_08_R3D_D3D_PRJ.tif	15	230727_DMI8_08_R3D_D3D_PRJ.tif15	CpC_OE	4220	1363	0.322986
230721_DMI4_20_R3D_D3D_PRJ.tif	15	230721_DMI4_20_R3D_D3D_PRJ.tif15	CpC_OE	8008	2973	0.371254
230721_DMI3_14_R3D_D3D_PRJ.tif	16	230721_DMI3_14_R3D_D3D_PRJ.tif16	CpC_OE	16791	249	0.0148294
230721_DMI3_18_R3D_D3D_PRJ.tif	16	230721_DMI3_18_R3D_D3D_PRJ.tif16	CpC_OE	14048	265	0.0188639
230719_DMI3_1_R3D_D3D_PRJ.tif	16	230719_DMI3_1_R3D_D3D_PRJ.tif16	CpC_OE	10144	255	0.025138
230721_DMI3_16_R3D_D3D_PRJ.tif	16	230721_DMI3_16_R3D_D3D_PRJ.tif16	CpC_OE	36429	955	0.0262154
230719_DMI3_9_R3D_D3D_PRJ.tif	16	230719_DMI3_9_R3D_D3D_PRJ.tif16	CpC_OE	5487	153	0.0278841
230721_DMI3_6_R3D_D3D_PRJ.tif	16	230721_DMI3_6_R3D_D3D_PRJ.tif16	CpC_OE	10073	324	0.0321652
230721_DMI4_16_R3D_D3D_PRJ.tif	16	230721_DMI4_16_R3D_D3D_PRJ.tif16	CpC_OE	7239	236	0.0326012
230721_DMI3_11_R3D_D3D_PRJ.tif	16	230721_DMI3_11_R3D_D3D_PRJ.tif16	CpC_OE	13577	460	0.0338808
230721_DMI3_8_R3D_D3D_PRJ.tif	16	230721_DMI3_8_R3D_D3D_PRJ.tif16	CpC_OE	15894	564	0.0354851
230719_DMI4_3_R3D_D3D_PRJ.tif	16	230719_DMI4_3_R3D_D3D_PRJ.tif16	CpC_OE	40887	1538	0.0376159
230721_DMI3_17_R3D_D3D_PRJ.tif	16	230721_DMI3_17_R3D_D3D_PRJ.tif16	CpC_OE	17768	713	0.0401283
230719_DMI3_3_R3D_D3D_PRJ.tif	16	230719_DMI3_3_R3D_D3D_PRJ.tif16	CpC_OE	19132	785	0.0410307
230721_DMI4_6_R3D_D3D_PRJ.tif	16	230721_DMI4_6_R3D_D3D_PRJ.tif16	CpC_OE	7951	329	0.0413784
230721_DMI3_7_R3D_D3D_PRJ.tif	16	230721_DMI3_7_R3D_D3D_PRJ.tif16	CpC_OE	11009	470	0.0426923
230721_DMI4_10_R3D_D3D_PRJ.tif	16	230721_DMI4_10_R3D_D3D_PRJ.tif16	CpC_OE	13293	614	0.0461897
230721_DMI4_17_R3D_D3D_PRJ.tif	16	230721_DMI4_17_R3D_D3D_PRJ.tif16	CpC_OE	17193	823	0.0478683
230721_DMI3_12_R3D_D3D_PRJ.tif	16	230721_DMI3_12_R3D_D3D_PRJ.tif16	CpC_OE	8897	436	0.0490053
230719_DMI3_4_R3D_D3D_PRJ.tif	16	230719_DMI3_4_R3D_D3D_PRJ.tif16	CpC_OE	19760	978	0.0494939
230727_DMI8_18_R3D_D3D_PRJ.tif	16	230727_DMI8_18_R3D_D3D_PRJ.tif16	CpC_OE	9086	493	0.0542593
230727_DMI8_10_R3D_D3D_PRJ.tif	16	230727_DMI8_10_R3D_D3D_PRJ.tif16	CpC_OE	9355	598	0.063923
230727_DMI8_07_R3D_D3D_PRJ.tif	16	230727_DMI8_07_R3D_D3D_PRJ.tif16	CpC_OE	16149	1042	0.0645241
230727_DMI8_12_R3D_D3D_PRJ.tif	16	230727_DMI8_12_R3D_D3D_PRJ.tif16	CpC_OE	13945	970	0.069559
230721_DMI3_13_R3D_D3D_PRJ.tif	16	230721_DMI3_13_R3D_D3D_PRJ.tif16	CpC_OE	5366	424	0.079016
230721_DMI4_19_R3D_D3D_PRJ.tif	16	230721_DMI4_19_R3D_D3D_PRJ.tif16	CpC_OE	19944	1585	0.0794725
230719_DMI4_4_R3D_D3D_PRJ.tif	16	230719_DMI4_4_R3D_D3D_PRJ.tif16	CpC_OE	13395	1269	0.0947368
230719_DMI3_2_R3D_D3D_PRJ.tif	16	230719_DMI3_2_R3D_D3D_PRJ.tif16	CpC_OE	7817	746	0.095433
230719_DMI3_8_R3D_D3D_PRJ.tif	16	230719_DMI3_8_R3D_D3D_PRJ.tif16	CpC_OE	9979	1042	0.104419
230719_DMI4_7_R3D_D3D_PRJ.tif	16	230719_DMI4_7_R3D_D3D_PRJ.tif16	CpC_OE	8169	871	0.106623
230721_DMI3_4_R3D_D3D_PRJ.tif	16	230721_DMI3_4_R3D_D3D_PRJ.tif16	CpC_OE	15558	1865	0.119874
230721_DMI4_7_R3D_D3D_PRJ.tif	16	230721_DMI4_7_R3D_D3D_PRJ.tif16	CpC_OE	3333	447	0.134113
230727_DMI8_03_R3D_D3D_PRJ.tif	16	230727_DMI8_03_R3D_D3D_PRJ.tif16	CpC_OE	10528	1414	0.134309
230721_DMI3_25_R3D_D3D_PRJ.tif	16	230721_DMI3_25_R3D_D3D_PRJ.tif16	CpC_OE	6500	881	0.135538
230719_DMI3_6_R3D_D3D_PRJ.tif	16	230719_DMI3_6_R3D_D3D_PRJ.tif16	CpC_OE	22031	3083	0.139939
230721_DMI4_9_R3D_D3D_PRJ.tif	16	230721_DMI4_9_R3D_D3D_PRJ.tif16	CpC_OE	1720	242	0.140698
230721_DMI4_5_R3D_D3D_PRJ.tif	16	230721_DMI4_5_R3D_D3D_PRJ.tif16	CpC_OE	7125	1004	0.140912
230727_DMI8_01_R3D_D3D_PRJ.tif	16	230727_DMI8_01_R3D_D3D_PRJ.tif16	CpC_OE	11636	1649	0.141715
230727_DMI8_11_R3D_D3D_PRJ.tif	16	230727_DMI8_11_R3D_D3D_PRJ.tif16	CpC_OE	11339	1635	0.144193
230721_DMI3_9_R3D_D3D_PRJ.tif	16	230721_DMI3_9_R3D_D3D_PRJ.tif16	CpC_OE	9273	1351	0.145692
230721_DMI4_20_R3D_D3D_PRJ.tif	16	230721_DMI4_20_R3D_D3D_PRJ.tif16	CpC_OE	6142	967	0.157441
230721_DMI3_2_R3D_D3D_PRJ.tif	16	230721_DMI3_2_R3D_D3D_PRJ.tif16	CpC_OE	8122	1294	0.15932
230721_DMI3_21_R3D_D3D_PRJ.tif	16	230721_DMI3_21_R3D_D3D_PRJ.tif16	CpC_OE	2703	432	0.159822
230721_DMI3_22_R3D_D3D_PRJ.tif	16	230721_DMI3_22_R3D_D3D_PRJ.tif16	CpC_OE	5677	926	0.163114
230721_DMI3_23_R3D_D3D_PRJ.tif	16	230721_DMI3_23_R3D_D3D_PRJ.tif16	CpC_OE	7826	1473	0.188219
230727_DMI8_04_R3D_D3D_PRJ.tif	16	230727_DMI8_04_R3D_D3D_PRJ.tif16	CpC_OE	4524	863	0.19076
230727_DMI8_19_R3D_D3D_PRJ.tif	16	230727_DMI8_19_R3D_D3D_PRJ.tif16	CpC_OE	11076	2117	0.191134
230721_DMI4_4_R3D_D3D_PRJ.tif	16	230721_DMI4_4_R3D_D3D_PRJ.tif16	CpC_OE	4090	808	0.197555
230727_DMI8_15_R3D_D3D_PRJ.tif	16	230727_DMI8_15_R3D_D3D_PRJ.tif16	CpC_OE	2810	612	0.217794
230719_DMI4_8_R3D_D3D_PRJ.tif	16	230719_DMI4_8_R3D_D3D_PRJ.tif16	CpC_OE	3774	901	0.238739
230721_DMI4_11_R3D_D3D_PRJ.tif	16	230721_DMI4_11_R3D_D3D_PRJ.tif16	CpC_OE	4294	1077	0.250815
230721_DMI4_13_R3D_D3D_PRJ.tif	16	230721_DMI4_13_R3D_D3D_PRJ.tif16	CpC_OE	9599	2464	0.256693
230727_DMI8_06_R3D_D3D_PRJ.tif	16	230727_DMI8_06_R3D_D3D_PRJ.tif16	CpC_OE	7106	1834	0.258092
230721_DMI4_22_R3D_D3D_PRJ.tif	16	230721_DMI4_22_R3D_D3D_PRJ.tif16	CpC_OE	5945	1656	0.278553
230727_DMI8_02_R3D_D3D_PRJ.tif	16	230727_DMI8_02_R3D_D3D_PRJ.tif16	CpC_OE	6184	1749	0.282827
230719_DMI3_5_R3D_D3D_PRJ.tif	16	230719_DMI3_5_R3D_D3D_PRJ.tif16	CpC_OE	4052	1178	0.290721
230721_DMI4_12_R3D_D3D_PRJ.tif	16	230721_DMI4_12_R3D_D3D_PRJ.tif16	CpC_OE	8075	2373	0.29387
230721_DMI4_21_R3D_D3D_PRJ.tif	16	230721_DMI4_21_R3D_D3D_PRJ.tif16	CpC_OE	7690	2267	0.294798
230721_DMI3_3_R3D_D3D_PRJ.tif	16	230721_DMI3_3_R3D_D3D_PRJ.tif16	CpC_OE	6339	1904	0.300363
230721_DMI3_1_R3D_D3D_PRJ.tif	16	230721_DMI3_1_R3D_D3D_PRJ.tif16	CpC_OE	10885	3404	0.312724
230727_DMI8_13_R3D_D3D_PRJ.tif	16	230727_DMI8_13_R3D_D3D_PRJ.tif16	CpC_OE	6008	2127	0.354028
230727_DMI8_16_R3D_D3D_PRJ.tif	16	230727_DMI8_16_R3D_D3D_PRJ.tif16	CpC_OE	10594	3821	0.360676
230719_DMI3_9_R3D_D3D_PRJ.tif	17	230719_DMI3_9_R3D_D3D_PRJ.tif17	CpC_OE	11877	137	0.0115349
230721_DMI3_25_R3D_D3D_PRJ.tif	17	230721_DMI3_25_R3D_D3D_PRJ.tif17	CpC_OE	16091	211	0.0131129
230719_DMI4_7_R3D_D3D_PRJ.tif	17	230719_DMI4_7_R3D_D3D_PRJ.tif17	CpC_OE	30402	457	0.0150319
230719_DMI3_8_R3D_D3D_PRJ.tif	17	230719_DMI3_8_R3D_D3D_PRJ.tif17	CpC_OE	21970	445	0.0202549
230719_DMI3_4_R3D_D3D_PRJ.tif	17	230719_DMI3_4_R3D_D3D_PRJ.tif17	CpC_OE	16990	395	0.023249
230721_DMI4_22_R3D_D3D_PRJ.tif	17	230721_DMI4_22_R3D_D3D_PRJ.tif17	CpC_OE	22858	612	0.026774
230719_DMI3_1_R3D_D3D_PRJ.tif	17	230719_DMI3_1_R3D_D3D_PRJ.tif17	CpC_OE	10266	319	0.0310734
230721_DMI3_7_R3D_D3D_PRJ.tif	17	230721_DMI3_7_R3D_D3D_PRJ.tif17	CpC_OE	19659	671	0.034132
230721_DMI3_17_R3D_D3D_PRJ.tif	17	230721_DMI3_17_R3D_D3D_PRJ.tif17	CpC_OE	15788	615	0.0389536
230727_DMI8_03_R3D_D3D_PRJ.tif	17	230727_DMI8_03_R3D_D3D_PRJ.tif17	CpC_OE	17430	723	0.0414802
230721_DMI3_13_R3D_D3D_PRJ.tif	17	230721_DMI3_13_R3D_D3D_PRJ.tif17	CpC_OE	8608	369	0.0428671
230719_DMI4_8_R3D_D3D_PRJ.tif	17	230719_DMI4_8_R3D_D3D_PRJ.tif17	CpC_OE	12438	587	0.0471941
230721_DMI4_5_R3D_D3D_PRJ.tif	17	230721_DMI4_5_R3D_D3D_PRJ.tif17	CpC_OE	14523	719	0.0495077
230721_DMI4_9_R3D_D3D_PRJ.tif	17	230721_DMI4_9_R3D_D3D_PRJ.tif17	CpC_OE	7957	398	0.0500189
230721_DMI3_21_R3D_D3D_PRJ.tif	17	230721_DMI3_21_R3D_D3D_PRJ.tif17	CpC_OE	4785	252	0.0526646
230721_DMI4_16_R3D_D3D_PRJ.tif	17	230721_DMI4_16_R3D_D3D_PRJ.tif17	CpC_OE	4202	223	0.05307
230721_DMI4_7_R3D_D3D_PRJ.tif	17	230721_DMI4_7_R3D_D3D_PRJ.tif17	CpC_OE	6799	372	0.0547139
230727_DMI8_01_R3D_D3D_PRJ.tif	17	230727_DMI8_01_R3D_D3D_PRJ.tif17	CpC_OE	10301	586	0.0568877
230721_DMI4_17_R3D_D3D_PRJ.tif	17	230721_DMI4_17_R3D_D3D_PRJ.tif17	CpC_OE	7162	428	0.0597598
230721_DMI3_22_R3D_D3D_PRJ.tif	17	230721_DMI3_22_R3D_D3D_PRJ.tif17	CpC_OE	3388	203	0.0599174
230719_DMI3_2_R3D_D3D_PRJ.tif	17	230719_DMI3_2_R3D_D3D_PRJ.tif17	CpC_OE	11219	678	0.0604332
230719_DMI3_6_R3D_D3D_PRJ.tif	17	230719_DMI3_6_R3D_D3D_PRJ.tif17	CpC_OE	35046	2218	0.0632883
230721_DMI3_11_R3D_D3D_PRJ.tif	17	230721_DMI3_11_R3D_D3D_PRJ.tif17	CpC_OE	6917	449	0.0649125
230721_DMI3_16_R3D_D3D_PRJ.tif	17	230721_DMI3_16_R3D_D3D_PRJ.tif17	CpC_OE	8390	569	0.0678188
230727_DMI8_16_R3D_D3D_PRJ.tif	17	230727_DMI8_16_R3D_D3D_PRJ.tif17	CpC_OE	5383	418	0.0776519
230719_DMI4_4_R3D_D3D_PRJ.tif	17	230719_DMI4_4_R3D_D3D_PRJ.tif17	CpC_OE	18213	1591	0.0873552
230721_DMI4_13_R3D_D3D_PRJ.tif	17	230721_DMI4_13_R3D_D3D_PRJ.tif17	CpC_OE	8358	752	0.0899737
230719_DMI3_3_R3D_D3D_PRJ.tif	17	230719_DMI3_3_R3D_D3D_PRJ.tif17	CpC_OE	12084	1111	0.0919398
230719_DMI3_5_R3D_D3D_PRJ.tif	17	230719_DMI3_5_R3D_D3D_PRJ.tif17	CpC_OE	10213	983	0.0962499
230727_DMI8_04_R3D_D3D_PRJ.tif	17	230727_DMI8_04_R3D_D3D_PRJ.tif17	CpC_OE	8448	836	0.0989583
230727_DMI8_08_R3D_D3D_PRJ.tif	17	230727_DMI8_08_R3D_D3D_PRJ.tif17	CpC_OE	5882	611	0.103876
230721_DMI3_23_R3D_D3D_PRJ.tif	17	230721_DMI3_23_R3D_D3D_PRJ.tif17	CpC_OE	8354	925	0.110725
230721_DMI3_12_R3D_D3D_PRJ.tif	17	230721_DMI3_12_R3D_D3D_PRJ.tif17	CpC_OE	19465	2183	0.11215
230727_DMI8_18_R3D_D3D_PRJ.tif	17	230727_DMI8_18_R3D_D3D_PRJ.tif17	CpC_OE	11771	1323	0.112395
230727_DMI8_13_R3D_D3D_PRJ.tif	17	230727_DMI8_13_R3D_D3D_PRJ.tif17	CpC_OE	14271	1713	0.120034
230727_DMI8_19_R3D_D3D_PRJ.tif	17	230727_DMI8_19_R3D_D3D_PRJ.tif17	CpC_OE	5970	725	0.121441
230719_DMI4_3_R3D_D3D_PRJ.tif	17	230719_DMI4_3_R3D_D3D_PRJ.tif17	CpC_OE	15372	1917	0.124707
230727_DMI8_11_R3D_D3D_PRJ.tif	17	230727_DMI8_11_R3D_D3D_PRJ.tif17	CpC_OE	17761	2278	0.128259
230719_DMI4_2_R3D_D3D_PRJ.tif	17	230719_DMI4_2_R3D_D3D_PRJ.tif17	CpC_OE	9973	1373	0.137672
230721_DMI3_10_R3D_D3D_PRJ.tif	17	230721_DMI3_10_R3D_D3D_PRJ.tif17	CpC_OE	10987	1598	0.145445
230721_DMI4_21_R3D_D3D_PRJ.tif	17	230721_DMI4_21_R3D_D3D_PRJ.tif17	CpC_OE	18768	2764	0.147272
230721_DMI4_10_R3D_D3D_PRJ.tif	17	230721_DMI4_10_R3D_D3D_PRJ.tif17	CpC_OE	8716	1289	0.147889
230721_DMI4_20_R3D_D3D_PRJ.tif	17	230721_DMI4_20_R3D_D3D_PRJ.tif17	CpC_OE	7358	1166	0.158467
230721_DMI3_14_R3D_D3D_PRJ.tif	17	230721_DMI3_14_R3D_D3D_PRJ.tif17	CpC_OE	1902	305	0.160358
230727_DMI8_17_R3D_D3D_PRJ.tif	17	230727_DMI8_17_R3D_D3D_PRJ.tif17	CpC_OE	8802	1514	0.172006
230721_DMI4_6_R3D_D3D_PRJ.tif	17	230721_DMI4_6_R3D_D3D_PRJ.tif17	CpC_OE	4720	848	0.179661
230721_DMI4_11_R3D_D3D_PRJ.tif	17	230721_DMI4_11_R3D_D3D_PRJ.tif17	CpC_OE	4395	911	0.207281
230727_DMI8_06_R3D_D3D_PRJ.tif	17	230727_DMI8_06_R3D_D3D_PRJ.tif17	CpC_OE	5986	1355	0.226362
230721_DMI4_4_R3D_D3D_PRJ.tif	17	230721_DMI4_4_R3D_D3D_PRJ.tif17	CpC_OE	7083	1644	0.232105
230721_DMI3_18_R3D_D3D_PRJ.tif	17	230721_DMI3_18_R3D_D3D_PRJ.tif17	CpC_OE	7838	1886	0.240623
230727_DMI8_07_R3D_D3D_PRJ.tif	17	230727_DMI8_07_R3D_D3D_PRJ.tif17	CpC_OE	5120	1353	0.264258
230727_DMI8_12_R3D_D3D_PRJ.tif	17	230727_DMI8_12_R3D_D3D_PRJ.tif17	CpC_OE	6516	1774	0.272253
230719_DMI3_4_R3D_D3D_PRJ.tif	18	230719_DMI3_4_R3D_D3D_PRJ.tif18	CpC_OE	19413	227	0.0116932
230721_DMI3_7_R3D_D3D_PRJ.tif	18	230721_DMI3_7_R3D_D3D_PRJ.tif18	CpC_OE	25896	388	0.014983
230719_DMI3_9_R3D_D3D_PRJ.tif	18	230719_DMI3_9_R3D_D3D_PRJ.tif18	CpC_OE	12581	206	0.0163739
230721_DMI3_11_R3D_D3D_PRJ.tif	18	230721_DMI3_11_R3D_D3D_PRJ.tif18	CpC_OE	11721	220	0.0187697
230721_DMI3_8_R3D_D3D_PRJ.tif	18	230721_DMI3_8_R3D_D3D_PRJ.tif18	CpC_OE	16928	325	0.019199
230721_DMI3_17_R3D_D3D_PRJ.tif	18	230721_DMI3_17_R3D_D3D_PRJ.tif18	CpC_OE	20641	436	0.021123
230721_DMI3_18_R3D_D3D_PRJ.tif	18	230721_DMI3_18_R3D_D3D_PRJ.tif18	CpC_OE	12212	303	0.0248117
230721_DMI3_14_R3D_D3D_PRJ.tif	18	230721_DMI3_14_R3D_D3D_PRJ.tif18	CpC_OE	17377	481	0.0276803
230719_DMI3_1_R3D_D3D_PRJ.tif	18	230719_DMI3_1_R3D_D3D_PRJ.tif18	CpC_OE	14842	426	0.0287023
230721_DMI3_25_R3D_D3D_PRJ.tif	18	230721_DMI3_25_R3D_D3D_PRJ.tif18	CpC_OE	15700	496	0.0315924
230719_DMI3_3_R3D_D3D_PRJ.tif	18	230719_DMI3_3_R3D_D3D_PRJ.tif18	CpC_OE	11611	457	0.0393592
230719_DMI4_4_R3D_D3D_PRJ.tif	18	230719_DMI4_4_R3D_D3D_PRJ.tif18	CpC_OE	14716	597	0.0405681
230719_DMI4_8_R3D_D3D_PRJ.tif	18	230719_DMI4_8_R3D_D3D_PRJ.tif18	CpC_OE	8526	389	0.0456251
230721_DMI4_7_R3D_D3D_PRJ.tif	18	230721_DMI4_7_R3D_D3D_PRJ.tif18	CpC_OE	5955	289	0.0485306
230721_DMI3_22_R3D_D3D_PRJ.tif	18	230721_DMI3_22_R3D_D3D_PRJ.tif18	CpC_OE	4814	236	0.0490237
230727_DMI8_17_R3D_D3D_PRJ.tif	18	230727_DMI8_17_R3D_D3D_PRJ.tif18	CpC_OE	5970	297	0.0497487
230721_DMI3_10_R3D_D3D_PRJ.tif	18	230721_DMI3_10_R3D_D3D_PRJ.tif18	CpC_OE	16145	844	0.0522762
230721_DMI4_20_R3D_D3D_PRJ.tif	18	230721_DMI4_20_R3D_D3D_PRJ.tif18	CpC_OE	13726	728	0.053038
230721_DMI4_21_R3D_D3D_PRJ.tif	18	230721_DMI4_21_R3D_D3D_PRJ.tif18	CpC_OE	21989	1326	0.0603029
230721_DMI4_19_R3D_D3D_PRJ.tif	18	230721_DMI4_19_R3D_D3D_PRJ.tif18	CpC_OE	23932	1596	0.066689
230721_DMI4_9_R3D_D3D_PRJ.tif	18	230721_DMI4_9_R3D_D3D_PRJ.tif18	CpC_OE	5601	374	0.0667738
230721_DMI3_16_R3D_D3D_PRJ.tif	18	230721_DMI3_16_R3D_D3D_PRJ.tif18	CpC_OE	6306	551	0.0873771
230727_DMI8_01_R3D_D3D_PRJ.tif	18	230727_DMI8_01_R3D_D3D_PRJ.tif18	CpC_OE	4666	409	0.0876554
230721_DMI4_4_R3D_D3D_PRJ.tif	18	230721_DMI4_4_R3D_D3D_PRJ.tif18	CpC_OE	6225	553	0.0888353
230721_DMI3_12_R3D_D3D_PRJ.tif	18	230721_DMI3_12_R3D_D3D_PRJ.tif18	CpC_OE	14112	1339	0.0948838
230719_DMI3_2_R3D_D3D_PRJ.tif	18	230719_DMI3_2_R3D_D3D_PRJ.tif18	CpC_OE	6533	625	0.0956681
230727_DMI8_03_R3D_D3D_PRJ.tif	18	230727_DMI8_03_R3D_D3D_PRJ.tif18	CpC_OE	14784	1434	0.0969968
230721_DMI4_6_R3D_D3D_PRJ.tif	18	230721_DMI4_6_R3D_D3D_PRJ.tif18	CpC_OE	6885	728	0.105737
230721_DMI4_10_R3D_D3D_PRJ.tif	18	230721_DMI4_10_R3D_D3D_PRJ.tif18	CpC_OE	8502	940	0.110562
230727_DMI8_19_R3D_D3D_PRJ.tif	18	230727_DMI8_19_R3D_D3D_PRJ.tif18	CpC_OE	6401	708	0.110608
230719_DMI3_8_R3D_D3D_PRJ.tif	18	230719_DMI3_8_R3D_D3D_PRJ.tif18	CpC_OE	9133	1019	0.111573
230719_DMI4_3_R3D_D3D_PRJ.tif	18	230719_DMI4_3_R3D_D3D_PRJ.tif18	CpC_OE	14112	1610	0.114087
230721_DMI3_13_R3D_D3D_PRJ.tif	18	230721_DMI3_13_R3D_D3D_PRJ.tif18	CpC_OE	9790	1154	0.117875
230721_DMI4_5_R3D_D3D_PRJ.tif	18	230721_DMI4_5_R3D_D3D_PRJ.tif18	CpC_OE	6248	749	0.119878
230721_DMI3_2_R3D_D3D_PRJ.tif	18	230721_DMI3_2_R3D_D3D_PRJ.tif18	CpC_OE	5851	705	0.120492
230721_DMI4_17_R3D_D3D_PRJ.tif	18	230721_DMI4_17_R3D_D3D_PRJ.tif18	CpC_OE	5149	625	0.121383
230721_DMI4_16_R3D_D3D_PRJ.tif	18	230721_DMI4_16_R3D_D3D_PRJ.tif18	CpC_OE	2842	381	0.134061
230721_DMI3_21_R3D_D3D_PRJ.tif	18	230721_DMI3_21_R3D_D3D_PRJ.tif18	CpC_OE	3845	540	0.140442
230721_DMI3_6_R3D_D3D_PRJ.tif	18	230721_DMI3_6_R3D_D3D_PRJ.tif18	CpC_OE	7522	1179	0.15674
230721_DMI4_12_R3D_D3D_PRJ.tif	18	230721_DMI4_12_R3D_D3D_PRJ.tif18	CpC_OE	5137	835	0.162546
230721_DMI3_1_R3D_D3D_PRJ.tif	18	230721_DMI3_1_R3D_D3D_PRJ.tif18	CpC_OE	10227	1700	0.166227
230719_DMI4_2_R3D_D3D_PRJ.tif	18	230719_DMI4_2_R3D_D3D_PRJ.tif18	CpC_OE	28768	4900	0.170328
230727_DMI8_12_R3D_D3D_PRJ.tif	18	230727_DMI8_12_R3D_D3D_PRJ.tif18	CpC_OE	6888	1191	0.172909
230721_DMI4_22_R3D_D3D_PRJ.tif	18	230721_DMI4_22_R3D_D3D_PRJ.tif18	CpC_OE	10393	1820	0.175118
230719_DMI3_5_R3D_D3D_PRJ.tif	18	230719_DMI3_5_R3D_D3D_PRJ.tif18	CpC_OE	10897	1918	0.176012
230727_DMI8_15_R3D_D3D_PRJ.tif	18	230727_DMI8_15_R3D_D3D_PRJ.tif18	CpC_OE	8572	1536	0.179188
230727_DMI8_08_R3D_D3D_PRJ.tif	18	230727_DMI8_08_R3D_D3D_PRJ.tif18	CpC_OE	6612	1263	0.191016
230721_DMI3_23_R3D_D3D_PRJ.tif	18	230721_DMI3_23_R3D_D3D_PRJ.tif18	CpC_OE	3045	616	0.202299
230719_DMI3_6_R3D_D3D_PRJ.tif	18	230719_DMI3_6_R3D_D3D_PRJ.tif18	CpC_OE	8452	1723	0.203857
230727_DMI8_06_R3D_D3D_PRJ.tif	18	230727_DMI8_06_R3D_D3D_PRJ.tif18	CpC_OE	4176	857	0.20522
230727_DMI8_13_R3D_D3D_PRJ.tif	18	230727_DMI8_13_R3D_D3D_PRJ.tif18	CpC_OE	12261	2569	0.209526
230727_DMI8_04_R3D_D3D_PRJ.tif	18	230727_DMI8_04_R3D_D3D_PRJ.tif18	CpC_OE	4224	1061	0.251184
230719_DMI4_1_R3D_D3D_PRJ.tif	18	230719_DMI4_1_R3D_D3D_PRJ.tif18	CpC_OE	15323	3892	0.253997
230727_DMI8_11_R3D_D3D_PRJ.tif	18	230727_DMI8_11_R3D_D3D_PRJ.tif18	CpC_OE	3883	1035	0.266546
230721_DMI3_4_R3D_D3D_PRJ.tif	18	230721_DMI3_4_R3D_D3D_PRJ.tif18	CpC_OE	13948	3947	0.28298
230721_DMI3_9_R3D_D3D_PRJ.tif	18	230721_DMI3_9_R3D_D3D_PRJ.tif18	CpC_OE	11078	3412	0.307998
230721_DMI4_13_R3D_D3D_PRJ.tif	18	230721_DMI4_13_R3D_D3D_PRJ.tif18	CpC_OE	2855	970	0.339755
230721_DMI4_5_R3D_D3D_PRJ.tif	19	230721_DMI4_5_R3D_D3D_PRJ.tif19	CpC_OE	22265	316	0.0141927
230721_DMI4_9_R3D_D3D_PRJ.tif	19	230721_DMI4_9_R3D_D3D_PRJ.tif19	CpC_OE	15909	234	0.0147087
230721_DMI3_14_R3D_D3D_PRJ.tif	19	230721_DMI3_14_R3D_D3D_PRJ.tif19	CpC_OE	19258	430	0.0223284
230721_DMI3_18_R3D_D3D_PRJ.tif	19	230721_DMI3_18_R3D_D3D_PRJ.tif19	CpC_OE	15588	407	0.0261098
230721_DMI4_6_R3D_D3D_PRJ.tif	19	230721_DMI4_6_R3D_D3D_PRJ.tif19	CpC_OE	19649	523	0.0266171
230721_DMI3_10_R3D_D3D_PRJ.tif	19	230721_DMI3_10_R3D_D3D_PRJ.tif19	CpC_OE	13034	396	0.0303821
230719_DMI3_9_R3D_D3D_PRJ.tif	19	230719_DMI3_9_R3D_D3D_PRJ.tif19	CpC_OE	7361	228	0.0309741
230719_DMI4_4_R3D_D3D_PRJ.tif	19	230719_DMI4_4_R3D_D3D_PRJ.tif19	CpC_OE	22881	824	0.0360124
230721_DMI3_7_R3D_D3D_PRJ.tif	19	230721_DMI3_7_R3D_D3D_PRJ.tif19	CpC_OE	13909	520	0.0373859
230721_DMI4_10_R3D_D3D_PRJ.tif	19	230721_DMI4_10_R3D_D3D_PRJ.tif19	CpC_OE	10465	447	0.0427138
230721_DMI4_16_R3D_D3D_PRJ.tif	19	230721_DMI4_16_R3D_D3D_PRJ.tif19	CpC_OE	10421	466	0.0447174
230721_DMI3_16_R3D_D3D_PRJ.tif	19	230721_DMI3_16_R3D_D3D_PRJ.tif19	CpC_OE	12313	554	0.0449931
230721_DMI3_4_R3D_D3D_PRJ.tif	19	230721_DMI3_4_R3D_D3D_PRJ.tif19	CpC_OE	21369	965	0.0451589
230719_DMI4_8_R3D_D3D_PRJ.tif	19	230719_DMI4_8_R3D_D3D_PRJ.tif19	CpC_OE	12653	607	0.0479728
230719_DMI4_7_R3D_D3D_PRJ.tif	19	230719_DMI4_7_R3D_D3D_PRJ.tif19	CpC_OE	15201	805	0.052957
230721_DMI4_17_R3D_D3D_PRJ.tif	19	230721_DMI4_17_R3D_D3D_PRJ.tif19	CpC_OE	7173	398	0.0554859
230719_DMI3_4_R3D_D3D_PRJ.tif	19	230719_DMI3_4_R3D_D3D_PRJ.tif19	CpC_OE	12722	715	0.0562019
230721_DMI3_17_R3D_D3D_PRJ.tif	19	230721_DMI3_17_R3D_D3D_PRJ.tif19	CpC_OE	16103	919	0.0570701
230721_DMI3_25_R3D_D3D_PRJ.tif	19	230721_DMI3_25_R3D_D3D_PRJ.tif19	CpC_OE	16106	953	0.0591705
230721_DMI3_11_R3D_D3D_PRJ.tif	19	230721_DMI3_11_R3D_D3D_PRJ.tif19	CpC_OE	17608	1068	0.0606542
230727_DMI8_04_R3D_D3D_PRJ.tif	19	230727_DMI8_04_R3D_D3D_PRJ.tif19	CpC_OE	6546	426	0.0650779
230721_DMI3_9_R3D_D3D_PRJ.tif	19	230721_DMI3_9_R3D_D3D_PRJ.tif19	CpC_OE	13028	898	0.0689285
230727_DMI8_07_R3D_D3D_PRJ.tif	19	230727_DMI8_07_R3D_D3D_PRJ.tif19	CpC_OE	4534	315	0.0694751
230727_DMI8_15_R3D_D3D_PRJ.tif	19	230727_DMI8_15_R3D_D3D_PRJ.tif19	CpC_OE	10924	827	0.0757049
230721_DMI3_13_R3D_D3D_PRJ.tif	19	230721_DMI3_13_R3D_D3D_PRJ.tif19	CpC_OE	9498	736	0.07749
230721_DMI4_4_R3D_D3D_PRJ.tif	19	230721_DMI4_4_R3D_D3D_PRJ.tif19	CpC_OE	4869	439	0.0901623
230727_DMI8_08_R3D_D3D_PRJ.tif	19	230727_DMI8_08_R3D_D3D_PRJ.tif19	CpC_OE	8218	742	0.0902896
230719_DMI3_1_R3D_D3D_PRJ.tif	19	230719_DMI3_1_R3D_D3D_PRJ.tif19	CpC_OE	5003	453	0.0905457
230721_DMI3_6_R3D_D3D_PRJ.tif	19	230721_DMI3_6_R3D_D3D_PRJ.tif19	CpC_OE	7871	744	0.0945242
230721_DMI3_21_R3D_D3D_PRJ.tif	19	230721_DMI3_21_R3D_D3D_PRJ.tif19	CpC_OE	9447	906	0.0959035
230727_DMI8_01_R3D_D3D_PRJ.tif	19	230727_DMI8_01_R3D_D3D_PRJ.tif19	CpC_OE	11215	1232	0.109853
230721_DMI3_2_R3D_D3D_PRJ.tif	19	230721_DMI3_2_R3D_D3D_PRJ.tif19	CpC_OE	7619	839	0.110119
230721_DMI4_21_R3D_D3D_PRJ.tif	19	230721_DMI4_21_R3D_D3D_PRJ.tif19	CpC_OE	8031	915	0.113934
230721_DMI3_23_R3D_D3D_PRJ.tif	19	230721_DMI3_23_R3D_D3D_PRJ.tif19	CpC_OE	7808	908	0.116291
230719_DMI3_6_R3D_D3D_PRJ.tif	19	230719_DMI3_6_R3D_D3D_PRJ.tif19	CpC_OE	14330	1715	0.119679
230719_DMI4_2_R3D_D3D_PRJ.tif	19	230719_DMI4_2_R3D_D3D_PRJ.tif19	CpC_OE	38378	4600	0.11986
230719_DMI3_8_R3D_D3D_PRJ.tif	19	230719_DMI3_8_R3D_D3D_PRJ.tif19	CpC_OE	4459	546	0.122449
230721_DMI3_8_R3D_D3D_PRJ.tif	19	230721_DMI3_8_R3D_D3D_PRJ.tif19	CpC_OE	5508	678	0.123094
230727_DMI8_12_R3D_D3D_PRJ.tif	19	230727_DMI8_12_R3D_D3D_PRJ.tif19	CpC_OE	11522	1444	0.125325
230721_DMI4_20_R3D_D3D_PRJ.tif	19	230721_DMI4_20_R3D_D3D_PRJ.tif19	CpC_OE	5825	748	0.128412
230721_DMI4_19_R3D_D3D_PRJ.tif	19	230721_DMI4_19_R3D_D3D_PRJ.tif19	CpC_OE	19600	2564	0.130816
230719_DMI3_2_R3D_D3D_PRJ.tif	19	230719_DMI3_2_R3D_D3D_PRJ.tif19	CpC_OE	6657	883	0.132642
230719_DMI3_5_R3D_D3D_PRJ.tif	19	230719_DMI3_5_R3D_D3D_PRJ.tif19	CpC_OE	12446	1713	0.137635
230721_DMI4_13_R3D_D3D_PRJ.tif	19	230721_DMI4_13_R3D_D3D_PRJ.tif19	CpC_OE	11091	1672	0.150753
230721_DMI4_22_R3D_D3D_PRJ.tif	19	230721_DMI4_22_R3D_D3D_PRJ.tif19	CpC_OE	5679	891	0.156894
230719_DMI4_3_R3D_D3D_PRJ.tif	19	230719_DMI4_3_R3D_D3D_PRJ.tif19	CpC_OE	5795	981	0.169284
230727_DMI8_17_R3D_D3D_PRJ.tif	19	230727_DMI8_17_R3D_D3D_PRJ.tif19	CpC_OE	4274	759	0.177585
230727_DMI8_18_R3D_D3D_PRJ.tif	19	230727_DMI8_18_R3D_D3D_PRJ.tif19	CpC_OE	9941	1847	0.185796
230727_DMI8_13_R3D_D3D_PRJ.tif	19	230727_DMI8_13_R3D_D3D_PRJ.tif19	CpC_OE	5929	1568	0.264463
230721_DMI4_7_R3D_D3D_PRJ.tif	19	230721_DMI4_7_R3D_D3D_PRJ.tif19	CpC_OE	3817	1088	0.285041
230721_DMI4_14_R3D_D3D_PRJ.tif	19	230721_DMI4_14_R3D_D3D_PRJ.tif19	CpC_OE	4142	1197	0.288991
230719_DMI3_3_R3D_D3D_PRJ.tif	19	230719_DMI3_3_R3D_D3D_PRJ.tif19	CpC_OE	2617	763	0.291555
230727_DMI8_10_R3D_D3D_PRJ.tif	19	230727_DMI8_10_R3D_D3D_PRJ.tif19	CpC_OE	6403	1868	0.291738
230721_DMI3_3_R3D_D3D_PRJ.tif	19	230721_DMI3_3_R3D_D3D_PRJ.tif19	CpC_OE	19991	6259	0.313091
230721_DMI3_1_R3D_D3D_PRJ.tif	19	230721_DMI3_1_R3D_D3D_PRJ.tif19	CpC_OE	6459	2189	0.338907
230727_DMI8_11_R3D_D3D_PRJ.tif	19	230727_DMI8_11_R3D_D3D_PRJ.tif19	CpC_OE	9743	3583	0.367751
230719_DMI3_9_R3D_D3D_PRJ.tif	20	230719_DMI3_9_R3D_D3D_PRJ.tif20	CpC_OE	14106	174	0.0123352
230721_DMI3_18_R3D_D3D_PRJ.tif	20	230721_DMI3_18_R3D_D3D_PRJ.tif20	CpC_OE	25982	683	0.0262874
230721_DMI3_11_R3D_D3D_PRJ.tif	20	230721_DMI3_11_R3D_D3D_PRJ.tif20	CpC_OE	12113	369	0.0304631
230719_DMI3_2_R3D_D3D_PRJ.tif	20	230719_DMI3_2_R3D_D3D_PRJ.tif20	CpC_OE	24792	793	0.0319861
230719_DMI3_1_R3D_D3D_PRJ.tif	20	230719_DMI3_1_R3D_D3D_PRJ.tif20	CpC_OE	10824	357	0.0329823
230719_DMI3_4_R3D_D3D_PRJ.tif	20	230719_DMI3_4_R3D_D3D_PRJ.tif20	CpC_OE	15181	521	0.0343192
230727_DMI8_03_R3D_D3D_PRJ.tif	20	230727_DMI8_03_R3D_D3D_PRJ.tif20	CpC_OE	15599	562	0.036028
230721_DMI3_8_R3D_D3D_PRJ.tif	20	230721_DMI3_8_R3D_D3D_PRJ.tif20	CpC_OE	14427	528	0.036598
230727_DMI8_08_R3D_D3D_PRJ.tif	20	230727_DMI8_08_R3D_D3D_PRJ.tif20	CpC_OE	11335	432	0.038112
230721_DMI3_25_R3D_D3D_PRJ.tif	20	230721_DMI3_25_R3D_D3D_PRJ.tif20	CpC_OE	17764	692	0.0389552
230721_DMI3_14_R3D_D3D_PRJ.tif	20	230721_DMI3_14_R3D_D3D_PRJ.tif20	CpC_OE	15236	651	0.0427278
230721_DMI4_5_R3D_D3D_PRJ.tif	20	230721_DMI4_5_R3D_D3D_PRJ.tif20	CpC_OE	10139	570	0.0562186
230721_DMI4_6_R3D_D3D_PRJ.tif	20	230721_DMI4_6_R3D_D3D_PRJ.tif20	CpC_OE	12933	755	0.0583778
230719_DMI3_8_R3D_D3D_PRJ.tif	20	230719_DMI3_8_R3D_D3D_PRJ.tif20	CpC_OE	9869	587	0.0594792
230721_DMI4_7_R3D_D3D_PRJ.tif	20	230721_DMI4_7_R3D_D3D_PRJ.tif20	CpC_OE	4267	275	0.0644481
230719_DMI4_8_R3D_D3D_PRJ.tif	20	230719_DMI4_8_R3D_D3D_PRJ.tif20	CpC_OE	9095	602	0.0661902
230727_DMI8_10_R3D_D3D_PRJ.tif	20	230727_DMI8_10_R3D_D3D_PRJ.tif20	CpC_OE	11526	781	0.0677598
230721_DMI3_10_R3D_D3D_PRJ.tif	20	230721_DMI3_10_R3D_D3D_PRJ.tif20	CpC_OE	14855	1081	0.0727701
230721_DMI4_21_R3D_D3D_PRJ.tif	20	230721_DMI4_21_R3D_D3D_PRJ.tif20	CpC_OE	6750	510	0.0755556
230721_DMI3_7_R3D_D3D_PRJ.tif	20	230721_DMI3_7_R3D_D3D_PRJ.tif20	CpC_OE	4838	403	0.0832989
230719_DMI3_5_R3D_D3D_PRJ.tif	20	230719_DMI3_5_R3D_D3D_PRJ.tif20	CpC_OE	13466	1171	0.0869598
230727_DMI8_06_R3D_D3D_PRJ.tif	20	230727_DMI8_06_R3D_D3D_PRJ.tif20	CpC_OE	6281	554	0.0882025
230721_DMI4_16_R3D_D3D_PRJ.tif	20	230721_DMI4_16_R3D_D3D_PRJ.tif20	CpC_OE	3620	329	0.090884
230721_DMI4_12_R3D_D3D_PRJ.tif	20	230721_DMI4_12_R3D_D3D_PRJ.tif20	CpC_OE	7001	637	0.090987
230727_DMI8_01_R3D_D3D_PRJ.tif	20	230727_DMI8_01_R3D_D3D_PRJ.tif20	CpC_OE	7237	672	0.0928562
230721_DMI3_21_R3D_D3D_PRJ.tif	20	230721_DMI3_21_R3D_D3D_PRJ.tif20	CpC_OE	6250	588	0.09408
230721_DMI4_4_R3D_D3D_PRJ.tif	20	230721_DMI4_4_R3D_D3D_PRJ.tif20	CpC_OE	10472	1029	0.098262
230721_DMI3_6_R3D_D3D_PRJ.tif	20	230721_DMI3_6_R3D_D3D_PRJ.tif20	CpC_OE	7337	758	0.103312
230727_DMI8_07_R3D_D3D_PRJ.tif	20	230727_DMI8_07_R3D_D3D_PRJ.tif20	CpC_OE	5851	614	0.104939
230721_DMI4_22_R3D_D3D_PRJ.tif	20	230721_DMI4_22_R3D_D3D_PRJ.tif20	CpC_OE	14622	1585	0.108398
230721_DMI3_17_R3D_D3D_PRJ.tif	20	230721_DMI3_17_R3D_D3D_PRJ.tif20	CpC_OE	9689	1057	0.109093
230721_DMI3_16_R3D_D3D_PRJ.tif	20	230721_DMI3_16_R3D_D3D_PRJ.tif20	CpC_OE	8939	1067	0.119365
230719_DMI3_3_R3D_D3D_PRJ.tif	20	230719_DMI3_3_R3D_D3D_PRJ.tif20	CpC_OE	6708	833	0.12418
230721_DMI4_13_R3D_D3D_PRJ.tif	20	230721_DMI4_13_R3D_D3D_PRJ.tif20	CpC_OE	6977	913	0.130859
230721_DMI3_9_R3D_D3D_PRJ.tif	20	230721_DMI3_9_R3D_D3D_PRJ.tif20	CpC_OE	13992	1851	0.13229
230719_DMI4_2_R3D_D3D_PRJ.tif	20	230719_DMI4_2_R3D_D3D_PRJ.tif20	CpC_OE	20845	2850	0.136723
230721_DMI4_20_R3D_D3D_PRJ.tif	20	230721_DMI4_20_R3D_D3D_PRJ.tif20	CpC_OE	5607	775	0.13822
230721_DMI4_9_R3D_D3D_PRJ.tif	20	230721_DMI4_9_R3D_D3D_PRJ.tif20	CpC_OE	3051	425	0.139299
230727_DMI8_11_R3D_D3D_PRJ.tif	20	230727_DMI8_11_R3D_D3D_PRJ.tif20	CpC_OE	6709	937	0.139663
230719_DMI4_3_R3D_D3D_PRJ.tif	20	230719_DMI4_3_R3D_D3D_PRJ.tif20	CpC_OE	8380	1175	0.140215
230721_DMI4_17_R3D_D3D_PRJ.tif	20	230721_DMI4_17_R3D_D3D_PRJ.tif20	CpC_OE	5349	773	0.144513
230727_DMI8_12_R3D_D3D_PRJ.tif	20	230727_DMI8_12_R3D_D3D_PRJ.tif20	CpC_OE	8550	1328	0.155322
230721_DMI3_13_R3D_D3D_PRJ.tif	20	230721_DMI3_13_R3D_D3D_PRJ.tif20	CpC_OE	8786	1388	0.157979
230727_DMI8_15_R3D_D3D_PRJ.tif	20	230727_DMI8_15_R3D_D3D_PRJ.tif20	CpC_OE	5220	845	0.161877
230727_DMI8_04_R3D_D3D_PRJ.tif	20	230727_DMI8_04_R3D_D3D_PRJ.tif20	CpC_OE	5883	1011	0.171851
230727_DMI8_13_R3D_D3D_PRJ.tif	20	230727_DMI8_13_R3D_D3D_PRJ.tif20	CpC_OE	14589	2755	0.188841
230727_DMI8_02_R3D_D3D_PRJ.tif	20	230727_DMI8_02_R3D_D3D_PRJ.tif20	CpC_OE	4342	833	0.191847
230727_DMI8_19_R3D_D3D_PRJ.tif	20	230727_DMI8_19_R3D_D3D_PRJ.tif20	CpC_OE	8672	1834	0.211485
230721_DMI3_22_R3D_D3D_PRJ.tif	20	230721_DMI3_22_R3D_D3D_PRJ.tif20	CpC_OE	3804	805	0.211619
230727_DMI8_18_R3D_D3D_PRJ.tif	20	230727_DMI8_18_R3D_D3D_PRJ.tif20	CpC_OE	5303	1152	0.217236
230719_DMI4_4_R3D_D3D_PRJ.tif	20	230719_DMI4_4_R3D_D3D_PRJ.tif20	CpC_OE	4190	939	0.224105
230721_DMI3_4_R3D_D3D_PRJ.tif	20	230721_DMI3_4_R3D_D3D_PRJ.tif20	CpC_OE	12204	2899	0.237545
230719_DMI3_6_R3D_D3D_PRJ.tif	20	230719_DMI3_6_R3D_D3D_PRJ.tif20	CpC_OE	12718	3049	0.239739
230721_DMI3_23_R3D_D3D_PRJ.tif	20	230721_DMI3_23_R3D_D3D_PRJ.tif20	CpC_OE	2577	627	0.243306
230721_DMI4_19_R3D_D3D_PRJ.tif	20	230721_DMI4_19_R3D_D3D_PRJ.tif20	CpC_OE	11357	2830	0.249186
230721_DMI4_11_R3D_D3D_PRJ.tif	20	230721_DMI4_11_R3D_D3D_PRJ.tif20	CpC_OE	2918	794	0.272104
230721_DMI4_10_R3D_D3D_PRJ.tif	20	230721_DMI4_10_R3D_D3D_PRJ.tif20	CpC_OE	12059	4323	0.358487
230721_DMI3_1_R3D_D3D_PRJ.tif	20	230721_DMI3_1_R3D_D3D_PRJ.tif20	CpC_OE	5179	1957	0.377872
230721_DMI3_11_R3D_D3D_PRJ.tif	21	230721_DMI3_11_R3D_D3D_PRJ.tif21	CpC_OE	16819	367	0.0218206
230719_DMI3_9_R3D_D3D_PRJ.tif	21	230719_DMI3_9_R3D_D3D_PRJ.tif21	CpC_OE	12314	274	0.0222511
230721_DMI3_14_R3D_D3D_PRJ.tif	21	230721_DMI3_14_R3D_D3D_PRJ.tif21	CpC_OE	32411	862	0.0265959
230721_DMI4_4_R3D_D3D_PRJ.tif	21	230721_DMI4_4_R3D_D3D_PRJ.tif21	CpC_OE	14373	475	0.0330481
230719_DMI4_7_R3D_D3D_PRJ.tif	21	230719_DMI4_7_R3D_D3D_PRJ.tif21	CpC_OE	12178	549	0.0450813
230721_DMI4_9_R3D_D3D_PRJ.tif	21	230721_DMI4_9_R3D_D3D_PRJ.tif21	CpC_OE	10728	493	0.0459545
230721_DMI3_10_R3D_D3D_PRJ.tif	21	230721_DMI3_10_R3D_D3D_PRJ.tif21	CpC_OE	11334	547	0.0482619
230721_DMI4_10_R3D_D3D_PRJ.tif	21	230721_DMI4_10_R3D_D3D_PRJ.tif21	CpC_OE	23082	1130	0.0489559
230727_DMI8_08_R3D_D3D_PRJ.tif	21	230727_DMI8_08_R3D_D3D_PRJ.tif21	CpC_OE	11763	582	0.0494772
230719_DMI3_8_R3D_D3D_PRJ.tif	21	230719_DMI3_8_R3D_D3D_PRJ.tif21	CpC_OE	10906	566	0.051898
230719_DMI3_2_R3D_D3D_PRJ.tif	21	230719_DMI3_2_R3D_D3D_PRJ.tif21	CpC_OE	7990	438	0.0548185
230719_DMI3_3_R3D_D3D_PRJ.tif	21	230719_DMI3_3_R3D_D3D_PRJ.tif21	CpC_OE	11526	634	0.0550061
230721_DMI3_7_R3D_D3D_PRJ.tif	21	230721_DMI3_7_R3D_D3D_PRJ.tif21	CpC_OE	9135	505	0.0552819
230727_DMI8_04_R3D_D3D_PRJ.tif	21	230727_DMI8_04_R3D_D3D_PRJ.tif21	CpC_OE	25086	1414	0.0563661
230719_DMI3_4_R3D_D3D_PRJ.tif	21	230719_DMI3_4_R3D_D3D_PRJ.tif21	CpC_OE	4128	236	0.0571705
230727_DMI8_03_R3D_D3D_PRJ.tif	21	230727_DMI8_03_R3D_D3D_PRJ.tif21	CpC_OE	9352	541	0.0578486
230721_DMI4_6_R3D_D3D_PRJ.tif	21	230721_DMI4_6_R3D_D3D_PRJ.tif21	CpC_OE	9337	551	0.0590125
230721_DMI4_7_R3D_D3D_PRJ.tif	21	230721_DMI4_7_R3D_D3D_PRJ.tif21	CpC_OE	5153	316	0.0613235
230727_DMI8_07_R3D_D3D_PRJ.tif	21	230727_DMI8_07_R3D_D3D_PRJ.tif21	CpC_OE	9120	566	0.0620614
230721_DMI4_20_R3D_D3D_PRJ.tif	21	230721_DMI4_20_R3D_D3D_PRJ.tif21	CpC_OE	6681	421	0.0630145
230721_DMI3_2_R3D_D3D_PRJ.tif	21	230721_DMI3_2_R3D_D3D_PRJ.tif21	CpC_OE	6807	435	0.0639048
230727_DMI8_13_R3D_D3D_PRJ.tif	21	230727_DMI8_13_R3D_D3D_PRJ.tif21	CpC_OE	14629	963	0.0658282
230719_DMI3_1_R3D_D3D_PRJ.tif	21	230719_DMI3_1_R3D_D3D_PRJ.tif21	CpC_OE	6279	414	0.0659341
230721_DMI4_17_R3D_D3D_PRJ.tif	21	230721_DMI4_17_R3D_D3D_PRJ.tif21	CpC_OE	5202	348	0.0668973
230719_DMI4_4_R3D_D3D_PRJ.tif	21	230719_DMI4_4_R3D_D3D_PRJ.tif21	CpC_OE	16251	1123	0.0691034
230727_DMI8_12_R3D_D3D_PRJ.tif	21	230727_DMI8_12_R3D_D3D_PRJ.tif21	CpC_OE	9514	681	0.0715787
230721_DMI3_18_R3D_D3D_PRJ.tif	21	230721_DMI3_18_R3D_D3D_PRJ.tif21	CpC_OE	7619	580	0.0761255
230719_DMI4_3_R3D_D3D_PRJ.tif	21	230719_DMI4_3_R3D_D3D_PRJ.tif21	CpC_OE	10570	842	0.0796594
230721_DMI3_22_R3D_D3D_PRJ.tif	21	230721_DMI3_22_R3D_D3D_PRJ.tif21	CpC_OE	6842	575	0.0840398
230719_DMI4_8_R3D_D3D_PRJ.tif	21	230719_DMI4_8_R3D_D3D_PRJ.tif21	CpC_OE	12463	1066	0.0855332
230721_DMI3_4_R3D_D3D_PRJ.tif	21	230721_DMI3_4_R3D_D3D_PRJ.tif21	CpC_OE	8528	778	0.0912289
230721_DMI3_8_R3D_D3D_PRJ.tif	21	230721_DMI3_8_R3D_D3D_PRJ.tif21	CpC_OE	4537	448	0.0987437
230721_DMI3_23_R3D_D3D_PRJ.tif	21	230721_DMI3_23_R3D_D3D_PRJ.tif21	CpC_OE	8103	804	0.0992225
230719_DMI3_5_R3D_D3D_PRJ.tif	21	230719_DMI3_5_R3D_D3D_PRJ.tif21	CpC_OE	14726	1529	0.10383
230721_DMI3_3_R3D_D3D_PRJ.tif	21	230721_DMI3_3_R3D_D3D_PRJ.tif21	CpC_OE	6932	759	0.109492
230721_DMI4_21_R3D_D3D_PRJ.tif	21	230721_DMI4_21_R3D_D3D_PRJ.tif21	CpC_OE	10285	1149	0.111716
230727_DMI8_15_R3D_D3D_PRJ.tif	21	230727_DMI8_15_R3D_D3D_PRJ.tif21	CpC_OE	11074	1259	0.11369
230721_DMI4_13_R3D_D3D_PRJ.tif	21	230721_DMI4_13_R3D_D3D_PRJ.tif21	CpC_OE	5936	748	0.126011
230727_DMI8_10_R3D_D3D_PRJ.tif	21	230727_DMI8_10_R3D_D3D_PRJ.tif21	CpC_OE	14265	1812	0.127024
230727_DMI8_01_R3D_D3D_PRJ.tif	21	230727_DMI8_01_R3D_D3D_PRJ.tif21	CpC_OE	9407	1224	0.130116
230727_DMI8_18_R3D_D3D_PRJ.tif	21	230727_DMI8_18_R3D_D3D_PRJ.tif21	CpC_OE	19267	2518	0.13069
230721_DMI4_16_R3D_D3D_PRJ.tif	21	230721_DMI4_16_R3D_D3D_PRJ.tif21	CpC_OE	2301	358	0.155585
230721_DMI4_11_R3D_D3D_PRJ.tif	21	230721_DMI4_11_R3D_D3D_PRJ.tif21	CpC_OE	12250	1929	0.157469
230721_DMI4_5_R3D_D3D_PRJ.tif	21	230721_DMI4_5_R3D_D3D_PRJ.tif21	CpC_OE	7368	1212	0.164495
230721_DMI3_1_R3D_D3D_PRJ.tif	21	230721_DMI3_1_R3D_D3D_PRJ.tif21	CpC_OE	7053	1251	0.177371
230721_DMI3_21_R3D_D3D_PRJ.tif	21	230721_DMI3_21_R3D_D3D_PRJ.tif21	CpC_OE	5038	898	0.178245
230721_DMI3_16_R3D_D3D_PRJ.tif	21	230721_DMI3_16_R3D_D3D_PRJ.tif21	CpC_OE	4992	904	0.18109
230721_DMI3_13_R3D_D3D_PRJ.tif	21	230721_DMI3_13_R3D_D3D_PRJ.tif21	CpC_OE	4842	916	0.189178
230721_DMI4_22_R3D_D3D_PRJ.tif	21	230721_DMI4_22_R3D_D3D_PRJ.tif21	CpC_OE	6628	1592	0.240193
230721_DMI3_25_R3D_D3D_PRJ.tif	21	230721_DMI3_25_R3D_D3D_PRJ.tif21	CpC_OE	4685	1158	0.247172
230721_DMI3_17_R3D_D3D_PRJ.tif	21	230721_DMI3_17_R3D_D3D_PRJ.tif21	CpC_OE	4061	1087	0.267668
230727_DMI8_02_R3D_D3D_PRJ.tif	21	230727_DMI8_02_R3D_D3D_PRJ.tif21	CpC_OE	2245	679	0.30245
230727_DMI8_19_R3D_D3D_PRJ.tif	21	230727_DMI8_19_R3D_D3D_PRJ.tif21	CpC_OE	6548	2458	0.375382
230719_DMI3_4_R3D_D3D_PRJ.tif	22	230719_DMI3_4_R3D_D3D_PRJ.tif22	CpC_OE	24221	414	0.0170926
230721_DMI4_4_R3D_D3D_PRJ.tif	22	230721_DMI4_4_R3D_D3D_PRJ.tif22	CpC_OE	15219	279	0.0183323
230721_DMI3_8_R3D_D3D_PRJ.tif	22	230721_DMI3_8_R3D_D3D_PRJ.tif22	CpC_OE	16156	397	0.0245729
230719_DMI3_9_R3D_D3D_PRJ.tif	22	230719_DMI3_9_R3D_D3D_PRJ.tif22	CpC_OE	13373	360	0.0269199
230721_DMI3_14_R3D_D3D_PRJ.tif	22	230721_DMI3_14_R3D_D3D_PRJ.tif22	CpC_OE	8162	255	0.0312423
230721_DMI4_22_R3D_D3D_PRJ.tif	22	230721_DMI4_22_R3D_D3D_PRJ.tif22	CpC_OE	18393	608	0.0330561
230719_DMI3_1_R3D_D3D_PRJ.tif	22	230719_DMI3_1_R3D_D3D_PRJ.tif22	CpC_OE	7524	272	0.036151
230721_DMI4_16_R3D_D3D_PRJ.tif	22	230721_DMI4_16_R3D_D3D_PRJ.tif22	CpC_OE	11955	467	0.0390632
230719_DMI3_2_R3D_D3D_PRJ.tif	22	230719_DMI3_2_R3D_D3D_PRJ.tif22	CpC_OE	15196	691	0.0454725
230721_DMI4_20_R3D_D3D_PRJ.tif	22	230721_DMI4_20_R3D_D3D_PRJ.tif22	CpC_OE	8026	381	0.0474707
230719_DMI4_3_R3D_D3D_PRJ.tif	22	230719_DMI4_3_R3D_D3D_PRJ.tif22	CpC_OE	18270	891	0.0487685
230721_DMI4_13_R3D_D3D_PRJ.tif	22	230721_DMI4_13_R3D_D3D_PRJ.tif22	CpC_OE	10768	538	0.0499629
230719_DMI4_4_R3D_D3D_PRJ.tif	22	230719_DMI4_4_R3D_D3D_PRJ.tif22	CpC_OE	10538	537	0.0509584
230721_DMI3_21_R3D_D3D_PRJ.tif	22	230721_DMI3_21_R3D_D3D_PRJ.tif22	CpC_OE	6631	359	0.0541396
230721_DMI4_17_R3D_D3D_PRJ.tif	22	230721_DMI4_17_R3D_D3D_PRJ.tif22	CpC_OE	11056	640	0.0578871
230721_DMI4_5_R3D_D3D_PRJ.tif	22	230721_DMI4_5_R3D_D3D_PRJ.tif22	CpC_OE	5223	311	0.0595443
230721_DMI3_25_R3D_D3D_PRJ.tif	22	230721_DMI3_25_R3D_D3D_PRJ.tif22	CpC_OE	11384	681	0.0598208
230721_DMI3_3_R3D_D3D_PRJ.tif	22	230721_DMI3_3_R3D_D3D_PRJ.tif22	CpC_OE	5345	383	0.0716558
230727_DMI8_07_R3D_D3D_PRJ.tif	22	230727_DMI8_07_R3D_D3D_PRJ.tif22	CpC_OE	10454	760	0.0726994
230721_DMI3_1_R3D_D3D_PRJ.tif	22	230721_DMI3_1_R3D_D3D_PRJ.tif22	CpC_OE	18279	1413	0.0773018
230721_DMI3_9_R3D_D3D_PRJ.tif	22	230721_DMI3_9_R3D_D3D_PRJ.tif22	CpC_OE	9739	800	0.082144
230719_DMI3_5_R3D_D3D_PRJ.tif	22	230719_DMI3_5_R3D_D3D_PRJ.tif22	CpC_OE	14440	1221	0.0845568
230721_DMI3_13_R3D_D3D_PRJ.tif	22	230721_DMI3_13_R3D_D3D_PRJ.tif22	CpC_OE	9279	785	0.0845996
230721_DMI4_21_R3D_D3D_PRJ.tif	22	230721_DMI4_21_R3D_D3D_PRJ.tif22	CpC_OE	15468	1332	0.0861133
230721_DMI3_17_R3D_D3D_PRJ.tif	22	230721_DMI3_17_R3D_D3D_PRJ.tif22	CpC_OE	7320	655	0.0894809
230721_DMI3_22_R3D_D3D_PRJ.tif	22	230721_DMI3_22_R3D_D3D_PRJ.tif22	CpC_OE	5453	508	0.0931597
230721_DMI3_23_R3D_D3D_PRJ.tif	22	230721_DMI3_23_R3D_D3D_PRJ.tif22	CpC_OE	6615	645	0.0975057
230727_DMI8_15_R3D_D3D_PRJ.tif	22	230727_DMI8_15_R3D_D3D_PRJ.tif22	CpC_OE	8995	880	0.0978321
230719_DMI3_8_R3D_D3D_PRJ.tif	22	230719_DMI3_8_R3D_D3D_PRJ.tif22	CpC_OE	5826	594	0.101957
230719_DMI4_8_R3D_D3D_PRJ.tif	22	230719_DMI4_8_R3D_D3D_PRJ.tif22	CpC_OE	3717	381	0.102502
230727_DMI8_08_R3D_D3D_PRJ.tif	22	230727_DMI8_08_R3D_D3D_PRJ.tif22	CpC_OE	10656	1149	0.107827
230719_DMI3_3_R3D_D3D_PRJ.tif	22	230719_DMI3_3_R3D_D3D_PRJ.tif22	CpC_OE	4746	550	0.115887
230721_DMI4_6_R3D_D3D_PRJ.tif	22	230721_DMI4_6_R3D_D3D_PRJ.tif22	CpC_OE	3293	416	0.126329
230727_DMI8_11_R3D_D3D_PRJ.tif	22	230727_DMI8_11_R3D_D3D_PRJ.tif22	CpC_OE	2915	381	0.130703
230721_DMI3_2_R3D_D3D_PRJ.tif	22	230721_DMI3_2_R3D_D3D_PRJ.tif22	CpC_OE	9641	1395	0.144695
230721_DMI3_16_R3D_D3D_PRJ.tif	22	230721_DMI3_16_R3D_D3D_PRJ.tif22	CpC_OE	5672	834	0.147038
230719_DMI4_7_R3D_D3D_PRJ.tif	22	230719_DMI4_7_R3D_D3D_PRJ.tif22	CpC_OE	3454	545	0.157788
230721_DMI3_18_R3D_D3D_PRJ.tif	22	230721_DMI3_18_R3D_D3D_PRJ.tif22	CpC_OE	2989	481	0.160923
230719_DMI3_6_R3D_D3D_PRJ.tif	22	230719_DMI3_6_R3D_D3D_PRJ.tif22	CpC_OE	13823	2317	0.167619
230727_DMI8_06_R3D_D3D_PRJ.tif	22	230727_DMI8_06_R3D_D3D_PRJ.tif22	CpC_OE	16625	2835	0.170526
230727_DMI8_04_R3D_D3D_PRJ.tif	22	230727_DMI8_04_R3D_D3D_PRJ.tif22	CpC_OE	6340	1108	0.174763
230721_DMI4_10_R3D_D3D_PRJ.tif	22	230721_DMI4_10_R3D_D3D_PRJ.tif22	CpC_OE	5736	1062	0.185146
230727_DMI8_12_R3D_D3D_PRJ.tif	22	230727_DMI8_12_R3D_D3D_PRJ.tif22	CpC_OE	8296	1784	0.215043
230721_DMI3_11_R3D_D3D_PRJ.tif	22	230721_DMI3_11_R3D_D3D_PRJ.tif22	CpC_OE	6719	1625	0.241851
230721_DMI4_12_R3D_D3D_PRJ.tif	22	230721_DMI4_12_R3D_D3D_PRJ.tif22	CpC_OE	13003	3284	0.252557
230727_DMI8_18_R3D_D3D_PRJ.tif	22	230727_DMI8_18_R3D_D3D_PRJ.tif22	CpC_OE	10437	2636	0.252563
230721_DMI3_10_R3D_D3D_PRJ.tif	22	230721_DMI3_10_R3D_D3D_PRJ.tif22	CpC_OE	3792	973	0.256593
230721_DMI4_7_R3D_D3D_PRJ.tif	22	230721_DMI4_7_R3D_D3D_PRJ.tif22	CpC_OE	4559	1255	0.27528
230727_DMI8_19_R3D_D3D_PRJ.tif	22	230727_DMI8_19_R3D_D3D_PRJ.tif22	CpC_OE	3360	959	0.285417
230721_DMI3_7_R3D_D3D_PRJ.tif	22	230721_DMI3_7_R3D_D3D_PRJ.tif22	CpC_OE	9897	2847	0.287663
230727_DMI8_01_R3D_D3D_PRJ.tif	22	230727_DMI8_01_R3D_D3D_PRJ.tif22	CpC_OE	9015	2711	0.300721
230727_DMI8_02_R3D_D3D_PRJ.tif	22	230727_DMI8_02_R3D_D3D_PRJ.tif22	CpC_OE	4129	1268	0.307096
230721_DMI4_11_R3D_D3D_PRJ.tif	22	230721_DMI4_11_R3D_D3D_PRJ.tif22	CpC_OE	2105	723	0.343468
230719_DMI3_1_R3D_D3D_PRJ.tif	23	230719_DMI3_1_R3D_D3D_PRJ.tif23	CpC_OE	19510	265	0.0135828
230721_DMI4_16_R3D_D3D_PRJ.tif	23	230721_DMI4_16_R3D_D3D_PRJ.tif23	CpC_OE	13340	281	0.0210645
230719_DMI3_9_R3D_D3D_PRJ.tif	23	230719_DMI3_9_R3D_D3D_PRJ.tif23	CpC_OE	9701	208	0.0214411
230719_DMI3_2_R3D_D3D_PRJ.tif	23	230719_DMI3_2_R3D_D3D_PRJ.tif23	CpC_OE	17426	401	0.0230116
230721_DMI3_14_R3D_D3D_PRJ.tif	23	230721_DMI3_14_R3D_D3D_PRJ.tif23	CpC_OE	12565	291	0.0231596
230721_DMI4_7_R3D_D3D_PRJ.tif	23	230721_DMI4_7_R3D_D3D_PRJ.tif23	CpC_OE	17143	407	0.0237415
230727_DMI8_08_R3D_D3D_PRJ.tif	23	230727_DMI8_08_R3D_D3D_PRJ.tif23	CpC_OE	13298	342	0.0257182
230721_DMI3_25_R3D_D3D_PRJ.tif	23	230721_DMI3_25_R3D_D3D_PRJ.tif23	CpC_OE	11740	314	0.0267462
230727_DMI8_03_R3D_D3D_PRJ.tif	23	230727_DMI8_03_R3D_D3D_PRJ.tif23	CpC_OE	12634	357	0.0282571
230721_DMI4_4_R3D_D3D_PRJ.tif	23	230721_DMI4_4_R3D_D3D_PRJ.tif23	CpC_OE	8101	232	0.0286384
230727_DMI8_04_R3D_D3D_PRJ.tif	23	230727_DMI8_04_R3D_D3D_PRJ.tif23	CpC_OE	13957	513	0.0367557
230721_DMI3_16_R3D_D3D_PRJ.tif	23	230721_DMI3_16_R3D_D3D_PRJ.tif23	CpC_OE	17375	665	0.0382734
230719_DMI3_4_R3D_D3D_PRJ.tif	23	230719_DMI3_4_R3D_D3D_PRJ.tif23	CpC_OE	15158	592	0.0390553
230721_DMI3_17_R3D_D3D_PRJ.tif	23	230721_DMI3_17_R3D_D3D_PRJ.tif23	CpC_OE	8196	386	0.0470961
230721_DMI3_18_R3D_D3D_PRJ.tif	23	230721_DMI3_18_R3D_D3D_PRJ.tif23	CpC_OE	7503	379	0.0505131
230721_DMI3_21_R3D_D3D_PRJ.tif	23	230721_DMI3_21_R3D_D3D_PRJ.tif23	CpC_OE	7574	413	0.0545287
230719_DMI3_8_R3D_D3D_PRJ.tif	23	230719_DMI3_8_R3D_D3D_PRJ.tif23	CpC_OE	10978	659	0.0600291
230721_DMI3_22_R3D_D3D_PRJ.tif	23	230721_DMI3_22_R3D_D3D_PRJ.tif23	CpC_OE	12891	780	0.0605073
230727_DMI8_17_R3D_D3D_PRJ.tif	23	230727_DMI8_17_R3D_D3D_PRJ.tif23	CpC_OE	8082	529	0.0654541
230721_DMI3_8_R3D_D3D_PRJ.tif	23	230721_DMI3_8_R3D_D3D_PRJ.tif23	CpC_OE	8521	589	0.0691233
230721_DMI4_17_R3D_D3D_PRJ.tif	23	230721_DMI4_17_R3D_D3D_PRJ.tif23	CpC_OE	6391	443	0.0693162
230727_DMI8_15_R3D_D3D_PRJ.tif	23	230727_DMI8_15_R3D_D3D_PRJ.tif23	CpC_OE	5890	414	0.0702886
230721_DMI4_22_R3D_D3D_PRJ.tif	23	230721_DMI4_22_R3D_D3D_PRJ.tif23	CpC_OE	10758	858	0.0797546
230721_DMI3_11_R3D_D3D_PRJ.tif	23	230721_DMI3_11_R3D_D3D_PRJ.tif23	CpC_OE	7688	619	0.0805151
230721_DMI3_3_R3D_D3D_PRJ.tif	23	230721_DMI3_3_R3D_D3D_PRJ.tif23	CpC_OE	14415	1210	0.0839403
230719_DMI3_3_R3D_D3D_PRJ.tif	23	230719_DMI3_3_R3D_D3D_PRJ.tif23	CpC_OE	15362	1304	0.0848848
230721_DMI3_6_R3D_D3D_PRJ.tif	23	230721_DMI3_6_R3D_D3D_PRJ.tif23	CpC_OE	17579	1514	0.0861255
230721_DMI4_20_R3D_D3D_PRJ.tif	23	230721_DMI4_20_R3D_D3D_PRJ.tif23	CpC_OE	7481	671	0.0896939
230721_DMI4_5_R3D_D3D_PRJ.tif	23	230721_DMI4_5_R3D_D3D_PRJ.tif23	CpC_OE	6623	610	0.0921033
230727_DMI8_13_R3D_D3D_PRJ.tif	23	230727_DMI8_13_R3D_D3D_PRJ.tif23	CpC_OE	8313	814	0.0979189
230721_DMI3_7_R3D_D3D_PRJ.tif	23	230721_DMI3_7_R3D_D3D_PRJ.tif23	CpC_OE	4561	447	0.0980048
230721_DMI4_19_R3D_D3D_PRJ.tif	23	230721_DMI4_19_R3D_D3D_PRJ.tif23	CpC_OE	14856	1468	0.0988153
230727_DMI8_12_R3D_D3D_PRJ.tif	23	230727_DMI8_12_R3D_D3D_PRJ.tif23	CpC_OE	11805	1269	0.107497
230721_DMI3_13_R3D_D3D_PRJ.tif	23	230721_DMI3_13_R3D_D3D_PRJ.tif23	CpC_OE	8174	950	0.116222
230727_DMI8_10_R3D_D3D_PRJ.tif	23	230727_DMI8_10_R3D_D3D_PRJ.tif23	CpC_OE	12126	1443	0.119
230719_DMI4_4_R3D_D3D_PRJ.tif	23	230719_DMI4_4_R3D_D3D_PRJ.tif23	CpC_OE	4300	522	0.121395
230727_DMI8_18_R3D_D3D_PRJ.tif	23	230727_DMI8_18_R3D_D3D_PRJ.tif23	CpC_OE	15284	2089	0.136679
230721_DMI3_23_R3D_D3D_PRJ.tif	23	230721_DMI3_23_R3D_D3D_PRJ.tif23	CpC_OE	3984	563	0.141315
230721_DMI3_1_R3D_D3D_PRJ.tif	23	230721_DMI3_1_R3D_D3D_PRJ.tif23	CpC_OE	7828	1183	0.151124
230719_DMI3_5_R3D_D3D_PRJ.tif	23	230719_DMI3_5_R3D_D3D_PRJ.tif23	CpC_OE	17323	2628	0.151706
230721_DMI4_6_R3D_D3D_PRJ.tif	23	230721_DMI4_6_R3D_D3D_PRJ.tif23	CpC_OE	7764	1215	0.156491
230719_DMI4_8_R3D_D3D_PRJ.tif	23	230719_DMI4_8_R3D_D3D_PRJ.tif23	CpC_OE	8654	1419	0.16397
230727_DMI8_02_R3D_D3D_PRJ.tif	23	230727_DMI8_02_R3D_D3D_PRJ.tif23	CpC_OE	5073	838	0.165188
230721_DMI4_21_R3D_D3D_PRJ.tif	23	230721_DMI4_21_R3D_D3D_PRJ.tif23	CpC_OE	11716	2196	0.187436
230721_DMI4_10_R3D_D3D_PRJ.tif	23	230721_DMI4_10_R3D_D3D_PRJ.tif23	CpC_OE	4502	1011	0.224567
230721_DMI4_11_R3D_D3D_PRJ.tif	23	230721_DMI4_11_R3D_D3D_PRJ.tif23	CpC_OE	9934	2386	0.240185
230719_DMI4_3_R3D_D3D_PRJ.tif	23	230719_DMI4_3_R3D_D3D_PRJ.tif23	CpC_OE	5628	1661	0.295131
230727_DMI8_19_R3D_D3D_PRJ.tif	23	230727_DMI8_19_R3D_D3D_PRJ.tif23	CpC_OE	8441	2598	0.307783
230727_DMI8_06_R3D_D3D_PRJ.tif	23	230727_DMI8_06_R3D_D3D_PRJ.tif23	CpC_OE	5944	1838	0.309219
230721_DMI4_14_R3D_D3D_PRJ.tif	23	230721_DMI4_14_R3D_D3D_PRJ.tif23	CpC_OE	4270	1365	0.319672
230721_DMI3_4_R3D_D3D_PRJ.tif	23	230721_DMI3_4_R3D_D3D_PRJ.tif23	CpC_OE	4639	1514	0.326363
230721_DMI3_2_R3D_D3D_PRJ.tif	23	230721_DMI3_2_R3D_D3D_PRJ.tif23	CpC_OE	3113	1030	0.330871
230721_DMI3_10_R3D_D3D_PRJ.tif	23	230721_DMI3_10_R3D_D3D_PRJ.tif23	CpC_OE	3194	1134	0.355041
230721_DMI4_17_R3D_D3D_PRJ.tif	24	230721_DMI4_17_R3D_D3D_PRJ.tif24	CpC_OE	16158	333	0.020609
230727_DMI8_06_R3D_D3D_PRJ.tif	24	230727_DMI8_06_R3D_D3D_PRJ.tif24	CpC_OE	23336	483	0.0206976
230719_DMI3_1_R3D_D3D_PRJ.tif	24	230719_DMI3_1_R3D_D3D_PRJ.tif24	CpC_OE	13557	291	0.0214649
230719_DMI3_6_R3D_D3D_PRJ.tif	24	230719_DMI3_6_R3D_D3D_PRJ.tif24	CpC_OE	24156	643	0.0266186
230719_DMI3_8_R3D_D3D_PRJ.tif	24	230719_DMI3_8_R3D_D3D_PRJ.tif24	CpC_OE	18454	586	0.0317546
230721_DMI3_14_R3D_D3D_PRJ.tif	24	230721_DMI3_14_R3D_D3D_PRJ.tif24	CpC_OE	19778	655	0.0331176
230721_DMI3_11_R3D_D3D_PRJ.tif	24	230721_DMI3_11_R3D_D3D_PRJ.tif24	CpC_OE	13830	529	0.0382502
230721_DMI4_20_R3D_D3D_PRJ.tif	24	230721_DMI4_20_R3D_D3D_PRJ.tif24	CpC_OE	15471	669	0.0432422
230721_DMI3_8_R3D_D3D_PRJ.tif	24	230721_DMI3_8_R3D_D3D_PRJ.tif24	CpC_OE	9301	427	0.045909
230719_DMI3_9_R3D_D3D_PRJ.tif	24	230719_DMI3_9_R3D_D3D_PRJ.tif24	CpC_OE	4994	255	0.0510613
230719_DMI4_8_R3D_D3D_PRJ.tif	24	230719_DMI4_8_R3D_D3D_PRJ.tif24	CpC_OE	8848	457	0.0516501
230719_DMI3_4_R3D_D3D_PRJ.tif	24	230719_DMI3_4_R3D_D3D_PRJ.tif24	CpC_OE	9607	505	0.0525658
230727_DMI8_04_R3D_D3D_PRJ.tif	24	230727_DMI8_04_R3D_D3D_PRJ.tif24	CpC_OE	5930	317	0.053457
230727_DMI8_12_R3D_D3D_PRJ.tif	24	230727_DMI8_12_R3D_D3D_PRJ.tif24	CpC_OE	10279	577	0.0561339
230721_DMI4_21_R3D_D3D_PRJ.tif	24	230721_DMI4_21_R3D_D3D_PRJ.tif24	CpC_OE	22755	1374	0.0603823
230727_DMI8_10_R3D_D3D_PRJ.tif	24	230727_DMI8_10_R3D_D3D_PRJ.tif24	CpC_OE	22465	1390	0.061874
230721_DMI3_13_R3D_D3D_PRJ.tif	24	230721_DMI3_13_R3D_D3D_PRJ.tif24	CpC_OE	11466	714	0.0622711
230721_DMI4_4_R3D_D3D_PRJ.tif	24	230721_DMI4_4_R3D_D3D_PRJ.tif24	CpC_OE	18250	1256	0.0688219
230727_DMI8_11_R3D_D3D_PRJ.tif	24	230727_DMI8_11_R3D_D3D_PRJ.tif24	CpC_OE	8924	633	0.0709323
230719_DMI3_2_R3D_D3D_PRJ.tif	24	230719_DMI3_2_R3D_D3D_PRJ.tif24	CpC_OE	8535	630	0.0738137
230721_DMI3_16_R3D_D3D_PRJ.tif	24	230721_DMI3_16_R3D_D3D_PRJ.tif24	CpC_OE	11058	819	0.074064
230727_DMI8_01_R3D_D3D_PRJ.tif	24	230727_DMI8_01_R3D_D3D_PRJ.tif24	CpC_OE	8184	626	0.0764907
230719_DMI3_5_R3D_D3D_PRJ.tif	24	230719_DMI3_5_R3D_D3D_PRJ.tif24	CpC_OE	24718	1994	0.08067
230719_DMI4_3_R3D_D3D_PRJ.tif	24	230719_DMI4_3_R3D_D3D_PRJ.tif24	CpC_OE	16054	1319	0.0821602
230721_DMI4_22_R3D_D3D_PRJ.tif	24	230721_DMI4_22_R3D_D3D_PRJ.tif24	CpC_OE	12822	1074	0.0837623
230727_DMI8_03_R3D_D3D_PRJ.tif	24	230727_DMI8_03_R3D_D3D_PRJ.tif24	CpC_OE	5369	454	0.0845595
230727_DMI8_13_R3D_D3D_PRJ.tif	24	230727_DMI8_13_R3D_D3D_PRJ.tif24	CpC_OE	7843	693	0.088359
230719_DMI3_3_R3D_D3D_PRJ.tif	24	230719_DMI3_3_R3D_D3D_PRJ.tif24	CpC_OE	4439	399	0.0898851
230719_DMI4_4_R3D_D3D_PRJ.tif	24	230719_DMI4_4_R3D_D3D_PRJ.tif24	CpC_OE	12551	1147	0.0913871
230721_DMI4_13_R3D_D3D_PRJ.tif	24	230721_DMI4_13_R3D_D3D_PRJ.tif24	CpC_OE	13306	1263	0.0949196
230721_DMI3_17_R3D_D3D_PRJ.tif	24	230721_DMI3_17_R3D_D3D_PRJ.tif24	CpC_OE	10689	1045	0.0977641
230721_DMI3_23_R3D_D3D_PRJ.tif	24	230721_DMI3_23_R3D_D3D_PRJ.tif24	CpC_OE	8190	851	0.103907
230727_DMI8_17_R3D_D3D_PRJ.tif	24	230727_DMI8_17_R3D_D3D_PRJ.tif24	CpC_OE	8432	956	0.113378
230721_DMI3_9_R3D_D3D_PRJ.tif	24	230721_DMI3_9_R3D_D3D_PRJ.tif24	CpC_OE	15488	2192	0.141529
230727_DMI8_08_R3D_D3D_PRJ.tif	24	230727_DMI8_08_R3D_D3D_PRJ.tif24	CpC_OE	16321	2356	0.144354
230727_DMI8_15_R3D_D3D_PRJ.tif	24	230727_DMI8_15_R3D_D3D_PRJ.tif24	CpC_OE	5885	878	0.149193
230727_DMI8_18_R3D_D3D_PRJ.tif	24	230727_DMI8_18_R3D_D3D_PRJ.tif24	CpC_OE	6384	983	0.153979
230719_DMI3_7_R3D_D3D_PRJ.tif	24	230719_DMI3_7_R3D_D3D_PRJ.tif24	CpC_OE	20686	3430	0.165813
230727_DMI8_02_R3D_D3D_PRJ.tif	24	230727_DMI8_02_R3D_D3D_PRJ.tif24	CpC_OE	11960	2005	0.167642
230721_DMI4_16_R3D_D3D_PRJ.tif	24	230721_DMI4_16_R3D_D3D_PRJ.tif24	CpC_OE	3330	561	0.168468
230721_DMI3_22_R3D_D3D_PRJ.tif	24	230721_DMI3_22_R3D_D3D_PRJ.tif24	CpC_OE	6436	1133	0.176041
230721_DMI3_10_R3D_D3D_PRJ.tif	24	230721_DMI3_10_R3D_D3D_PRJ.tif24	CpC_OE	6363	1170	0.183876
230721_DMI4_11_R3D_D3D_PRJ.tif	24	230721_DMI4_11_R3D_D3D_PRJ.tif24	CpC_OE	15952	3067	0.192264
230721_DMI3_1_R3D_D3D_PRJ.tif	24	230721_DMI3_1_R3D_D3D_PRJ.tif24	CpC_OE	5508	1104	0.200436
230721_DMI3_25_R3D_D3D_PRJ.tif	24	230721_DMI3_25_R3D_D3D_PRJ.tif24	CpC_OE	9666	1993	0.206187
230721_DMI4_5_R3D_D3D_PRJ.tif	24	230721_DMI4_5_R3D_D3D_PRJ.tif24	CpC_OE	1200	278	0.231667
230721_DMI3_6_R3D_D3D_PRJ.tif	24	230721_DMI3_6_R3D_D3D_PRJ.tif24	CpC_OE	6029	1590	0.263725
230721_DMI3_7_R3D_D3D_PRJ.tif	24	230721_DMI3_7_R3D_D3D_PRJ.tif24	CpC_OE	7883	2506	0.317899
230721_DMI4_6_R3D_D3D_PRJ.tif	24	230721_DMI4_6_R3D_D3D_PRJ.tif24	CpC_OE	4467	1425	0.319006
230721_DMI4_10_R3D_D3D_PRJ.tif	24	230721_DMI4_10_R3D_D3D_PRJ.tif24	CpC_OE	3256	1040	0.31941
230721_DMI3_21_R3D_D3D_PRJ.tif	24	230721_DMI3_21_R3D_D3D_PRJ.tif24	CpC_OE	3364	1202	0.357313
230721_DMI3_2_R3D_D3D_PRJ.tif	24	230721_DMI3_2_R3D_D3D_PRJ.tif24	CpC_OE	2709	982	0.362495
230719_DMI3_4_R3D_D3D_PRJ.tif	25	230719_DMI3_4_R3D_D3D_PRJ.tif25	CpC_OE	34835	355	0.0101909
230719_DMI4_4_R3D_D3D_PRJ.tif	25	230719_DMI4_4_R3D_D3D_PRJ.tif25	CpC_OE	17768	304	0.0171094
230719_DMI3_9_R3D_D3D_PRJ.tif	25	230719_DMI3_9_R3D_D3D_PRJ.tif25	CpC_OE	7326	137	0.0187005
230721_DMI3_7_R3D_D3D_PRJ.tif	25	230721_DMI3_7_R3D_D3D_PRJ.tif25	CpC_OE	21093	427	0.0202437
230721_DMI3_2_R3D_D3D_PRJ.tif	25	230721_DMI3_2_R3D_D3D_PRJ.tif25	CpC_OE	12857	414	0.0322004
230719_DMI3_1_R3D_D3D_PRJ.tif	25	230719_DMI3_1_R3D_D3D_PRJ.tif25	CpC_OE	7885	300	0.0380469
230721_DMI3_17_R3D_D3D_PRJ.tif	25	230721_DMI3_17_R3D_D3D_PRJ.tif25	CpC_OE	10953	504	0.0460148
230721_DMI4_16_R3D_D3D_PRJ.tif	25	230721_DMI4_16_R3D_D3D_PRJ.tif25	CpC_OE	5743	282	0.0491033
230721_DMI3_18_R3D_D3D_PRJ.tif	25	230721_DMI3_18_R3D_D3D_PRJ.tif25	CpC_OE	7572	393	0.0519017
230721_DMI3_16_R3D_D3D_PRJ.tif	25	230721_DMI3_16_R3D_D3D_PRJ.tif25	CpC_OE	8497	446	0.0524891
230719_DMI3_3_R3D_D3D_PRJ.tif	25	230719_DMI3_3_R3D_D3D_PRJ.tif25	CpC_OE	8608	458	0.0532063
230719_DMI4_8_R3D_D3D_PRJ.tif	25	230719_DMI4_8_R3D_D3D_PRJ.tif25	CpC_OE	19351	1036	0.0535373
230721_DMI4_5_R3D_D3D_PRJ.tif	25	230721_DMI4_5_R3D_D3D_PRJ.tif25	CpC_OE	6724	385	0.0572576
230721_DMI3_15_R3D_D3D_PRJ.tif	25	230721_DMI3_15_R3D_D3D_PRJ.tif25	CpC_OE	11273	661	0.0586357
230721_DMI3_11_R3D_D3D_PRJ.tif	25	230721_DMI3_11_R3D_D3D_PRJ.tif25	CpC_OE	13729	830	0.060456
230721_DMI3_25_R3D_D3D_PRJ.tif	25	230721_DMI3_25_R3D_D3D_PRJ.tif25	CpC_OE	7705	493	0.0639844
230721_DMI3_14_R3D_D3D_PRJ.tif	25	230721_DMI3_14_R3D_D3D_PRJ.tif25	CpC_OE	9086	677	0.0745102
230727_DMI8_11_R3D_D3D_PRJ.tif	25	230727_DMI8_11_R3D_D3D_PRJ.tif25	CpC_OE	13965	1048	0.0750448
230719_DMI3_8_R3D_D3D_PRJ.tif	25	230719_DMI3_8_R3D_D3D_PRJ.tif25	CpC_OE	8840	678	0.0766968
230721_DMI3_8_R3D_D3D_PRJ.tif	25	230721_DMI3_8_R3D_D3D_PRJ.tif25	CpC_OE	4960	382	0.0770161
230721_DMI4_6_R3D_D3D_PRJ.tif	25	230721_DMI4_6_R3D_D3D_PRJ.tif25	CpC_OE	11111	876	0.0788408
230721_DMI4_14_R3D_D3D_PRJ.tif	25	230721_DMI4_14_R3D_D3D_PRJ.tif25	CpC_OE	10974	906	0.0825588
230719_DMI3_6_R3D_D3D_PRJ.tif	25	230719_DMI3_6_R3D_D3D_PRJ.tif25	CpC_OE	16877	1435	0.085027
230719_DMI4_5_R3D_D3D_PRJ.tif	25	230719_DMI4_5_R3D_D3D_PRJ.tif25	CpC_OE	44667	3856	0.0863277
230721_DMI4_22_R3D_D3D_PRJ.tif	25	230721_DMI4_22_R3D_D3D_PRJ.tif25	CpC_OE	9379	831	0.0886022
230721_DMI3_22_R3D_D3D_PRJ.tif	25	230721_DMI3_22_R3D_D3D_PRJ.tif25	CpC_OE	7007	628	0.0896247
230721_DMI4_7_R3D_D3D_PRJ.tif	25	230721_DMI4_7_R3D_D3D_PRJ.tif25	CpC_OE	6666	619	0.0928593
230727_DMI8_02_R3D_D3D_PRJ.tif	25	230727_DMI8_02_R3D_D3D_PRJ.tif25	CpC_OE	5973	558	0.0934204
230721_DMI3_10_R3D_D3D_PRJ.tif	25	230721_DMI3_10_R3D_D3D_PRJ.tif25	CpC_OE	6756	642	0.0950266
230719_DMI3_5_R3D_D3D_PRJ.tif	25	230719_DMI3_5_R3D_D3D_PRJ.tif25	CpC_OE	24462	2620	0.107105
230721_DMI4_4_R3D_D3D_PRJ.tif	25	230721_DMI4_4_R3D_D3D_PRJ.tif25	CpC_OE	8850	985	0.111299
230721_DMI4_13_R3D_D3D_PRJ.tif	25	230721_DMI4_13_R3D_D3D_PRJ.tif25	CpC_OE	9481	1104	0.116443
230727_DMI8_06_R3D_D3D_PRJ.tif	25	230727_DMI8_06_R3D_D3D_PRJ.tif25	CpC_OE	7216	858	0.118902
230721_DMI3_6_R3D_D3D_PRJ.tif	25	230721_DMI3_6_R3D_D3D_PRJ.tif25	CpC_OE	11864	1450	0.122218
230727_DMI8_13_R3D_D3D_PRJ.tif	25	230727_DMI8_13_R3D_D3D_PRJ.tif25	CpC_OE	7652	997	0.130293
230721_DMI3_1_R3D_D3D_PRJ.tif	25	230721_DMI3_1_R3D_D3D_PRJ.tif25	CpC_OE	11648	1530	0.131353
230719_DMI3_2_R3D_D3D_PRJ.tif	25	230719_DMI3_2_R3D_D3D_PRJ.tif25	CpC_OE	5400	721	0.133519
230727_DMI8_03_R3D_D3D_PRJ.tif	25	230727_DMI8_03_R3D_D3D_PRJ.tif25	CpC_OE	8500	1158	0.136235
230727_DMI8_19_R3D_D3D_PRJ.tif	25	230727_DMI8_19_R3D_D3D_PRJ.tif25	CpC_OE	11228	1582	0.140898
230721_DMI3_21_R3D_D3D_PRJ.tif	25	230721_DMI3_21_R3D_D3D_PRJ.tif25	CpC_OE	5119	768	0.150029
230721_DMI4_21_R3D_D3D_PRJ.tif	25	230721_DMI4_21_R3D_D3D_PRJ.tif25	CpC_OE	6514	994	0.152594
230727_DMI8_17_R3D_D3D_PRJ.tif	25	230727_DMI8_17_R3D_D3D_PRJ.tif25	CpC_OE	9931	1545	0.155573
230721_DMI3_9_R3D_D3D_PRJ.tif	25	230721_DMI3_9_R3D_D3D_PRJ.tif25	CpC_OE	5404	931	0.17228
230727_DMI8_18_R3D_D3D_PRJ.tif	25	230727_DMI8_18_R3D_D3D_PRJ.tif25	CpC_OE	5795	1083	0.186885
230721_DMI3_4_R3D_D3D_PRJ.tif	25	230721_DMI3_4_R3D_D3D_PRJ.tif25	CpC_OE	22440	4204	0.187344
230721_DMI4_11_R3D_D3D_PRJ.tif	25	230721_DMI4_11_R3D_D3D_PRJ.tif25	CpC_OE	10038	1907	0.189978
230727_DMI8_15_R3D_D3D_PRJ.tif	25	230727_DMI8_15_R3D_D3D_PRJ.tif25	CpC_OE	3791	733	0.193353
230719_DMI4_2_R3D_D3D_PRJ.tif	25	230719_DMI4_2_R3D_D3D_PRJ.tif25	CpC_OE	22154	4483	0.202356
230727_DMI8_04_R3D_D3D_PRJ.tif	25	230727_DMI8_04_R3D_D3D_PRJ.tif25	CpC_OE	3581	732	0.204412
230719_DMI4_3_R3D_D3D_PRJ.tif	25	230719_DMI4_3_R3D_D3D_PRJ.tif25	CpC_OE	5991	1361	0.227174
230727_DMI8_12_R3D_D3D_PRJ.tif	25	230727_DMI8_12_R3D_D3D_PRJ.tif25	CpC_OE	7544	1742	0.230912
230721_DMI4_20_R3D_D3D_PRJ.tif	25	230721_DMI4_20_R3D_D3D_PRJ.tif25	CpC_OE	5232	1224	0.233945
230721_DMI4_12_R3D_D3D_PRJ.tif	25	230721_DMI4_12_R3D_D3D_PRJ.tif25	CpC_OE	4477	1104	0.246594
230727_DMI8_01_R3D_D3D_PRJ.tif	25	230727_DMI8_01_R3D_D3D_PRJ.tif25	CpC_OE	10220	2727	0.26683
230721_DMI4_19_R3D_D3D_PRJ.tif	25	230721_DMI4_19_R3D_D3D_PRJ.tif25	CpC_OE	10850	2966	0.273364
230719_DMI4_7_R3D_D3D_PRJ.tif	25	230719_DMI4_7_R3D_D3D_PRJ.tif25	CpC_OE	2370	713	0.300844
230727_DMI8_10_R3D_D3D_PRJ.tif	25	230727_DMI8_10_R3D_D3D_PRJ.tif25	CpC_OE	5269	1855	0.352059
230721_DMI4_17_R3D_D3D_PRJ.tif	25	230721_DMI4_17_R3D_D3D_PRJ.tif25	CpC_OE	3618	1297	0.358485
230727_DMI8_08_R3D_D3D_PRJ.tif	25	230727_DMI8_08_R3D_D3D_PRJ.tif25	CpC_OE	3680	1335	0.362772
230721_DMI3_13_R3D_D3D_PRJ.tif	25	230721_DMI3_13_R3D_D3D_PRJ.tif25	CpC_OE	2514	953	0.379077
230721_DMI4_5_R3D_D3D_PRJ.tif	26	230721_DMI4_5_R3D_D3D_PRJ.tif26	CpC_OE	25213	230	0.00912228
230721_DMI3_25_R3D_D3D_PRJ.tif	26	230721_DMI3_25_R3D_D3D_PRJ.tif26	CpC_OE	16663	271	0.0162636
230721_DMI4_7_R3D_D3D_PRJ.tif	26	230721_DMI4_7_R3D_D3D_PRJ.tif26	CpC_OE	9678	167	0.0172556
230721_DMI3_18_R3D_D3D_PRJ.tif	26	230721_DMI3_18_R3D_D3D_PRJ.tif26	CpC_OE	14175	285	0.0201058
230721_DMI3_21_R3D_D3D_PRJ.tif	26	230721_DMI3_21_R3D_D3D_PRJ.tif26	CpC_OE	9894	241	0.0243582
230727_DMI8_04_R3D_D3D_PRJ.tif	26	230727_DMI8_04_R3D_D3D_PRJ.tif26	CpC_OE	5434	138	0.0253957
230727_DMI8_03_R3D_D3D_PRJ.tif	26	230727_DMI8_03_R3D_D3D_PRJ.tif26	CpC_OE	12787	337	0.0263549
230721_DMI4_4_R3D_D3D_PRJ.tif	26	230721_DMI4_4_R3D_D3D_PRJ.tif26	CpC_OE	17376	567	0.0326312
230721_DMI4_6_R3D_D3D_PRJ.tif	26	230721_DMI4_6_R3D_D3D_PRJ.tif26	CpC_OE	24029	863	0.0359149
230721_DMI3_11_R3D_D3D_PRJ.tif	26	230721_DMI3_11_R3D_D3D_PRJ.tif26	CpC_OE	18234	656	0.0359767
230719_DMI3_9_R3D_D3D_PRJ.tif	26	230719_DMI3_9_R3D_D3D_PRJ.tif26	CpC_OE	5924	229	0.0386563
230719_DMI3_2_R3D_D3D_PRJ.tif	26	230719_DMI3_2_R3D_D3D_PRJ.tif26	CpC_OE	17265	696	0.0403128
230719_DMI4_4_R3D_D3D_PRJ.tif	26	230719_DMI4_4_R3D_D3D_PRJ.tif26	CpC_OE	13899	626	0.0450392
230719_DMI4_8_R3D_D3D_PRJ.tif	26	230719_DMI4_8_R3D_D3D_PRJ.tif26	CpC_OE	13129	613	0.0466905
230721_DMI3_8_R3D_D3D_PRJ.tif	26	230721_DMI3_8_R3D_D3D_PRJ.tif26	CpC_OE	24495	1150	0.0469484
230721_DMI4_17_R3D_D3D_PRJ.tif	26	230721_DMI4_17_R3D_D3D_PRJ.tif26	CpC_OE	10673	505	0.0473157
230721_DMI4_20_R3D_D3D_PRJ.tif	26	230721_DMI4_20_R3D_D3D_PRJ.tif26	CpC_OE	6708	328	0.0488968
230721_DMI3_14_R3D_D3D_PRJ.tif	26	230721_DMI3_14_R3D_D3D_PRJ.tif26	CpC_OE	16418	815	0.0496406
230721_DMI4_13_R3D_D3D_PRJ.tif	26	230721_DMI4_13_R3D_D3D_PRJ.tif26	CpC_OE	6332	317	0.0500632
230719_DMI3_4_R3D_D3D_PRJ.tif	26	230719_DMI3_4_R3D_D3D_PRJ.tif26	CpC_OE	8075	425	0.0526316
230719_DMI3_1_R3D_D3D_PRJ.tif	26	230719_DMI3_1_R3D_D3D_PRJ.tif26	CpC_OE	6202	329	0.0530474
230721_DMI3_16_R3D_D3D_PRJ.tif	26	230721_DMI3_16_R3D_D3D_PRJ.tif26	CpC_OE	18512	1140	0.0615817
230719_DMI3_8_R3D_D3D_PRJ.tif	26	230719_DMI3_8_R3D_D3D_PRJ.tif26	CpC_OE	11984	788	0.0657543
230719_DMI3_6_R3D_D3D_PRJ.tif	26	230719_DMI3_6_R3D_D3D_PRJ.tif26	CpC_OE	30258	2096	0.0692709
230721_DMI3_9_R3D_D3D_PRJ.tif	26	230721_DMI3_9_R3D_D3D_PRJ.tif26	CpC_OE	19179	1356	0.0707023
230727_DMI8_06_R3D_D3D_PRJ.tif	26	230727_DMI8_06_R3D_D3D_PRJ.tif26	CpC_OE	8736	702	0.0803571
230727_DMI8_01_R3D_D3D_PRJ.tif	26	230727_DMI8_01_R3D_D3D_PRJ.tif26	CpC_OE	3588	311	0.0866778
230721_DMI3_7_R3D_D3D_PRJ.tif	26	230721_DMI3_7_R3D_D3D_PRJ.tif26	CpC_OE	10358	998	0.0963506
230721_DMI3_2_R3D_D3D_PRJ.tif	26	230721_DMI3_2_R3D_D3D_PRJ.tif26	CpC_OE	7032	683	0.0971274
230721_DMI3_6_R3D_D3D_PRJ.tif	26	230721_DMI3_6_R3D_D3D_PRJ.tif26	CpC_OE	9217	901	0.0977541
230721_DMI3_23_R3D_D3D_PRJ.tif	26	230721_DMI3_23_R3D_D3D_PRJ.tif26	CpC_OE	4540	460	0.101322
230727_DMI8_13_R3D_D3D_PRJ.tif	26	230727_DMI8_13_R3D_D3D_PRJ.tif26	CpC_OE	6422	670	0.104329
230727_DMI8_19_R3D_D3D_PRJ.tif	26	230727_DMI8_19_R3D_D3D_PRJ.tif26	CpC_OE	11394	1232	0.108127
230727_DMI8_15_R3D_D3D_PRJ.tif	26	230727_DMI8_15_R3D_D3D_PRJ.tif26	CpC_OE	7041	840	0.119301
230727_DMI8_10_R3D_D3D_PRJ.tif	26	230727_DMI8_10_R3D_D3D_PRJ.tif26	CpC_OE	8408	1135	0.13499
230721_DMI3_13_R3D_D3D_PRJ.tif	26	230721_DMI3_13_R3D_D3D_PRJ.tif26	CpC_OE	9761	1318	0.135027
230727_DMI8_08_R3D_D3D_PRJ.tif	26	230727_DMI8_08_R3D_D3D_PRJ.tif26	CpC_OE	3435	467	0.135953
230721_DMI4_10_R3D_D3D_PRJ.tif	26	230721_DMI4_10_R3D_D3D_PRJ.tif26	CpC_OE	13688	1893	0.138296
230721_DMI3_22_R3D_D3D_PRJ.tif	26	230721_DMI3_22_R3D_D3D_PRJ.tif26	CpC_OE	5742	802	0.139673
230721_DMI4_19_R3D_D3D_PRJ.tif	26	230721_DMI4_19_R3D_D3D_PRJ.tif26	CpC_OE	13594	1982	0.1458
230721_DMI4_14_R3D_D3D_PRJ.tif	26	230721_DMI4_14_R3D_D3D_PRJ.tif26	CpC_OE	7974	1301	0.163155
230721_DMI4_11_R3D_D3D_PRJ.tif	26	230721_DMI4_11_R3D_D3D_PRJ.tif26	CpC_OE	6194	1061	0.171295
230721_DMI3_10_R3D_D3D_PRJ.tif	26	230721_DMI3_10_R3D_D3D_PRJ.tif26	CpC_OE	4525	806	0.178122
230721_DMI3_17_R3D_D3D_PRJ.tif	26	230721_DMI3_17_R3D_D3D_PRJ.tif26	CpC_OE	3125	563	0.18016
230721_DMI4_22_R3D_D3D_PRJ.tif	26	230721_DMI4_22_R3D_D3D_PRJ.tif26	CpC_OE	5572	1093	0.196159
230721_DMI3_3_R3D_D3D_PRJ.tif	26	230721_DMI3_3_R3D_D3D_PRJ.tif26	CpC_OE	3385	684	0.202068
230719_DMI3_7_R3D_D3D_PRJ.tif	26	230719_DMI3_7_R3D_D3D_PRJ.tif26	CpC_OE	8028	1665	0.207399
230721_DMI3_1_R3D_D3D_PRJ.tif	26	230721_DMI3_1_R3D_D3D_PRJ.tif26	CpC_OE	5799	1262	0.217624
230721_DMI4_21_R3D_D3D_PRJ.tif	26	230721_DMI4_21_R3D_D3D_PRJ.tif26	CpC_OE	12507	3042	0.243224
230719_DMI4_2_R3D_D3D_PRJ.tif	26	230719_DMI4_2_R3D_D3D_PRJ.tif26	CpC_OE	8007	2085	0.260397
230727_DMI8_12_R3D_D3D_PRJ.tif	26	230727_DMI8_12_R3D_D3D_PRJ.tif26	CpC_OE	2945	770	0.26146
230719_DMI4_7_R3D_D3D_PRJ.tif	26	230719_DMI4_7_R3D_D3D_PRJ.tif26	CpC_OE	2220	581	0.261712
230727_DMI8_17_R3D_D3D_PRJ.tif	26	230727_DMI8_17_R3D_D3D_PRJ.tif26	CpC_OE	2913	764	0.262273
230719_DMI3_5_R3D_D3D_PRJ.tif	26	230719_DMI3_5_R3D_D3D_PRJ.tif26	CpC_OE	8150	2459	0.301718
230719_DMI3_9_R3D_D3D_PRJ.tif	27	230719_DMI3_9_R3D_D3D_PRJ.tif27	CpC_OE	9908	183	0.0184699
230719_DMI3_1_R3D_D3D_PRJ.tif	27	230719_DMI3_1_R3D_D3D_PRJ.tif27	CpC_OE	18276	370	0.0202451
230721_DMI3_14_R3D_D3D_PRJ.tif	27	230721_DMI3_14_R3D_D3D_PRJ.tif27	CpC_OE	9667	197	0.0203786
230719_DMI3_2_R3D_D3D_PRJ.tif	27	230719_DMI3_2_R3D_D3D_PRJ.tif27	CpC_OE	23275	554	0.0238024
230721_DMI4_21_R3D_D3D_PRJ.tif	27	230721_DMI4_21_R3D_D3D_PRJ.tif27	CpC_OE	18529	527	0.0284419
230721_DMI4_17_R3D_D3D_PRJ.tif	27	230721_DMI4_17_R3D_D3D_PRJ.tif27	CpC_OE	12541	359	0.0286261
230719_DMI4_7_R3D_D3D_PRJ.tif	27	230719_DMI4_7_R3D_D3D_PRJ.tif27	CpC_OE	19073	627	0.0328737
230719_DMI3_4_R3D_D3D_PRJ.tif	27	230719_DMI3_4_R3D_D3D_PRJ.tif27	CpC_OE	9873	374	0.0378811
230721_DMI3_7_R3D_D3D_PRJ.tif	27	230721_DMI3_7_R3D_D3D_PRJ.tif27	CpC_OE	7164	332	0.0463428
230721_DMI4_7_R3D_D3D_PRJ.tif	27	230721_DMI4_7_R3D_D3D_PRJ.tif27	CpC_OE	6845	329	0.0480643
230721_DMI3_8_R3D_D3D_PRJ.tif	27	230721_DMI3_8_R3D_D3D_PRJ.tif27	CpC_OE	11201	542	0.0483885
230719_DMI3_5_R3D_D3D_PRJ.tif	27	230719_DMI3_5_R3D_D3D_PRJ.tif27	CpC_OE	16997	836	0.0491851
230727_DMI8_17_R3D_D3D_PRJ.tif	27	230727_DMI8_17_R3D_D3D_PRJ.tif27	CpC_OE	7369	387	0.0525173
230721_DMI3_25_R3D_D3D_PRJ.tif	27	230721_DMI3_25_R3D_D3D_PRJ.tif27	CpC_OE	8142	437	0.0536723
230721_DMI3_11_R3D_D3D_PRJ.tif	27	230721_DMI3_11_R3D_D3D_PRJ.tif27	CpC_OE	17580	946	0.0538111
230721_DMI4_10_R3D_D3D_PRJ.tif	27	230721_DMI4_10_R3D_D3D_PRJ.tif27	CpC_OE	11183	618	0.0552625
230727_DMI8_04_R3D_D3D_PRJ.tif	27	230727_DMI8_04_R3D_D3D_PRJ.tif27	CpC_OE	14828	833	0.0561775
230721_DMI4_4_R3D_D3D_PRJ.tif	27	230721_DMI4_4_R3D_D3D_PRJ.tif27	CpC_OE	11477	712	0.0620371
230721_DMI3_16_R3D_D3D_PRJ.tif	27	230721_DMI3_16_R3D_D3D_PRJ.tif27	CpC_OE	12756	797	0.0624804
230721_DMI3_17_R3D_D3D_PRJ.tif	27	230721_DMI3_17_R3D_D3D_PRJ.tif27	CpC_OE	8282	538	0.0649602
230721_DMI4_16_R3D_D3D_PRJ.tif	27	230721_DMI4_16_R3D_D3D_PRJ.tif27	CpC_OE	6908	458	0.0662999
230721_DMI3_21_R3D_D3D_PRJ.tif	27	230721_DMI3_21_R3D_D3D_PRJ.tif27	CpC_OE	3461	263	0.0759896
230721_DMI4_6_R3D_D3D_PRJ.tif	27	230721_DMI4_6_R3D_D3D_PRJ.tif27	CpC_OE	5576	441	0.079089
230721_DMI3_13_R3D_D3D_PRJ.tif	27	230721_DMI3_13_R3D_D3D_PRJ.tif27	CpC_OE	7798	702	0.0900231
230721_DMI3_23_R3D_D3D_PRJ.tif	27	230721_DMI3_23_R3D_D3D_PRJ.tif27	CpC_OE	3423	331	0.0966988
230727_DMI8_01_R3D_D3D_PRJ.tif	27	230727_DMI8_01_R3D_D3D_PRJ.tif27	CpC_OE	5811	562	0.0967131
230727_DMI8_19_R3D_D3D_PRJ.tif	27	230727_DMI8_19_R3D_D3D_PRJ.tif27	CpC_OE	11481	1253	0.109137
230719_DMI4_3_R3D_D3D_PRJ.tif	27	230719_DMI4_3_R3D_D3D_PRJ.tif27	CpC_OE	20519	2305	0.112335
230719_DMI3_3_R3D_D3D_PRJ.tif	27	230719_DMI3_3_R3D_D3D_PRJ.tif27	CpC_OE	9437	1142	0.121013
230727_DMI8_12_R3D_D3D_PRJ.tif	27	230727_DMI8_12_R3D_D3D_PRJ.tif27	CpC_OE	6236	772	0.123797
230727_DMI8_03_R3D_D3D_PRJ.tif	27	230727_DMI8_03_R3D_D3D_PRJ.tif27	CpC_OE	13704	1738	0.126824
230721_DMI3_2_R3D_D3D_PRJ.tif	27	230721_DMI3_2_R3D_D3D_PRJ.tif27	CpC_OE	8580	1099	0.128089
230719_DMI3_8_R3D_D3D_PRJ.tif	27	230719_DMI3_8_R3D_D3D_PRJ.tif27	CpC_OE	5252	674	0.128332
230727_DMI8_13_R3D_D3D_PRJ.tif	27	230727_DMI8_13_R3D_D3D_PRJ.tif27	CpC_OE	15823	2052	0.129685
230721_DMI4_13_R3D_D3D_PRJ.tif	27	230721_DMI4_13_R3D_D3D_PRJ.tif27	CpC_OE	9332	1254	0.134376
230721_DMI3_1_R3D_D3D_PRJ.tif	27	230721_DMI3_1_R3D_D3D_PRJ.tif27	CpC_OE	10435	1438	0.137805
230721_DMI4_22_R3D_D3D_PRJ.tif	27	230721_DMI4_22_R3D_D3D_PRJ.tif27	CpC_OE	10059	1427	0.141863
230721_DMI3_22_R3D_D3D_PRJ.tif	27	230721_DMI3_22_R3D_D3D_PRJ.tif27	CpC_OE	4850	741	0.152784
230719_DMI4_4_R3D_D3D_PRJ.tif	27	230719_DMI4_4_R3D_D3D_PRJ.tif27	CpC_OE	6973	1088	0.15603
230719_DMI4_1_R3D_D3D_PRJ.tif	27	230719_DMI4_1_R3D_D3D_PRJ.tif27	CpC_OE	22318	3536	0.158437
230721_DMI3_10_R3D_D3D_PRJ.tif	27	230721_DMI3_10_R3D_D3D_PRJ.tif27	CpC_OE	6460	1055	0.163313
230721_DMI3_9_R3D_D3D_PRJ.tif	27	230721_DMI3_9_R3D_D3D_PRJ.tif27	CpC_OE	7989	1385	0.173363
230719_DMI3_6_R3D_D3D_PRJ.tif	27	230719_DMI3_6_R3D_D3D_PRJ.tif27	CpC_OE	13210	2376	0.179864
230721_DMI4_20_R3D_D3D_PRJ.tif	27	230721_DMI4_20_R3D_D3D_PRJ.tif27	CpC_OE	8838	1661	0.187938
230721_DMI4_5_R3D_D3D_PRJ.tif	27	230721_DMI4_5_R3D_D3D_PRJ.tif27	CpC_OE	5392	1085	0.201224
230727_DMI8_06_R3D_D3D_PRJ.tif	27	230727_DMI8_06_R3D_D3D_PRJ.tif27	CpC_OE	10883	2230	0.204907
230719_DMI4_8_R3D_D3D_PRJ.tif	27	230719_DMI4_8_R3D_D3D_PRJ.tif27	CpC_OE	5244	1123	0.21415
230721_DMI4_14_R3D_D3D_PRJ.tif	27	230721_DMI4_14_R3D_D3D_PRJ.tif27	CpC_OE	4001	912	0.227943
230721_DMI3_6_R3D_D3D_PRJ.tif	27	230721_DMI3_6_R3D_D3D_PRJ.tif27	CpC_OE	5902	1347	0.228228
230727_DMI8_11_R3D_D3D_PRJ.tif	27	230727_DMI8_11_R3D_D3D_PRJ.tif27	CpC_OE	8157	1865	0.228638
230721_DMI4_11_R3D_D3D_PRJ.tif	27	230721_DMI4_11_R3D_D3D_PRJ.tif27	CpC_OE	10599	2507	0.236532
230727_DMI8_08_R3D_D3D_PRJ.tif	27	230727_DMI8_08_R3D_D3D_PRJ.tif27	CpC_OE	4370	1302	0.297941
230721_DMI3_4_R3D_D3D_PRJ.tif	27	230721_DMI3_4_R3D_D3D_PRJ.tif27	CpC_OE	8737	2642	0.302392
230727_DMI8_10_R3D_D3D_PRJ.tif	27	230727_DMI8_10_R3D_D3D_PRJ.tif27	CpC_OE	8557	2646	0.309221
230721_DMI3_5_R3D_D3D_PRJ.tif	27	230721_DMI3_5_R3D_D3D_PRJ.tif27	CpC_OE	891	320	0.359147
230719_DMI3_8_R3D_D3D_PRJ.tif	28	230719_DMI3_8_R3D_D3D_PRJ.tif28	CpC_OE	21967	312	0.0142031
230721_DMI4_5_R3D_D3D_PRJ.tif	28	230721_DMI4_5_R3D_D3D_PRJ.tif28	CpC_OE	18982	401	0.0211253
230719_DMI3_9_R3D_D3D_PRJ.tif	28	230719_DMI3_9_R3D_D3D_PRJ.tif28	CpC_OE	10381	243	0.0234081
230721_DMI3_7_R3D_D3D_PRJ.tif	28	230721_DMI3_7_R3D_D3D_PRJ.tif28	CpC_OE	18667	561	0.030053
230721_DMI4_13_R3D_D3D_PRJ.tif	28	230721_DMI4_13_R3D_D3D_PRJ.tif28	CpC_OE	13513	462	0.0341893
230721_DMI4_6_R3D_D3D_PRJ.tif	28	230721_DMI4_6_R3D_D3D_PRJ.tif28	CpC_OE	20542	805	0.039188
230721_DMI4_7_R3D_D3D_PRJ.tif	28	230721_DMI4_7_R3D_D3D_PRJ.tif28	CpC_OE	8654	375	0.0433326
230719_DMI3_2_R3D_D3D_PRJ.tif	28	230719_DMI3_2_R3D_D3D_PRJ.tif28	CpC_OE	13952	633	0.0453698
230727_DMI8_13_R3D_D3D_PRJ.tif	28	230727_DMI8_13_R3D_D3D_PRJ.tif28	CpC_OE	21689	1027	0.0473512
230727_DMI8_02_R3D_D3D_PRJ.tif	28	230727_DMI8_02_R3D_D3D_PRJ.tif28	CpC_OE	8098	394	0.048654
230721_DMI3_16_R3D_D3D_PRJ.tif	28	230721_DMI3_16_R3D_D3D_PRJ.tif28	CpC_OE	7729	379	0.0490361
230719_DMI3_4_R3D_D3D_PRJ.tif	28	230719_DMI3_4_R3D_D3D_PRJ.tif28	CpC_OE	12382	654	0.0528186
230721_DMI3_25_R3D_D3D_PRJ.tif	28	230721_DMI3_25_R3D_D3D_PRJ.tif28	CpC_OE	11435	630	0.055094
230721_DMI4_10_R3D_D3D_PRJ.tif	28	230721_DMI4_10_R3D_D3D_PRJ.tif28	CpC_OE	13037	761	0.0583723
230719_DMI3_1_R3D_D3D_PRJ.tif	28	230719_DMI3_1_R3D_D3D_PRJ.tif28	CpC_OE	7484	471	0.0629343
230721_DMI3_21_R3D_D3D_PRJ.tif	28	230721_DMI3_21_R3D_D3D_PRJ.tif28	CpC_OE	6083	392	0.0644419
230719_DMI4_3_R3D_D3D_PRJ.tif	28	230719_DMI4_3_R3D_D3D_PRJ.tif28	CpC_OE	20421	1316	0.0644435
230721_DMI4_21_R3D_D3D_PRJ.tif	28	230721_DMI4_21_R3D_D3D_PRJ.tif28	CpC_OE	16362	1162	0.0710182
230721_DMI3_15_R3D_D3D_PRJ.tif	28	230721_DMI3_15_R3D_D3D_PRJ.tif28	CpC_OE	8411	606	0.0720485
230721_DMI4_20_R3D_D3D_PRJ.tif	28	230721_DMI4_20_R3D_D3D_PRJ.tif28	CpC_OE	7089	534	0.075328
230727_DMI8_06_R3D_D3D_PRJ.tif	28	230727_DMI8_06_R3D_D3D_PRJ.tif28	CpC_OE	6019	455	0.075594
230721_DMI3_8_R3D_D3D_PRJ.tif	28	230721_DMI3_8_R3D_D3D_PRJ.tif28	CpC_OE	10042	760	0.0756821
230719_DMI4_4_R3D_D3D_PRJ.tif	28	230719_DMI4_4_R3D_D3D_PRJ.tif28	CpC_OE	10218	800	0.0782932
230721_DMI3_4_R3D_D3D_PRJ.tif	28	230721_DMI3_4_R3D_D3D_PRJ.tif28	CpC_OE	18572	1519	0.0817898
230727_DMI8_08_R3D_D3D_PRJ.tif	28	230727_DMI8_08_R3D_D3D_PRJ.tif28	CpC_OE	10104	837	0.0828385
230721_DMI3_22_R3D_D3D_PRJ.tif	28	230721_DMI3_22_R3D_D3D_PRJ.tif28	CpC_OE	6222	537	0.0863067
230721_DMI3_13_R3D_D3D_PRJ.tif	28	230721_DMI3_13_R3D_D3D_PRJ.tif28	CpC_OE	16436	1422	0.0865174
230721_DMI3_10_R3D_D3D_PRJ.tif	28	230721_DMI3_10_R3D_D3D_PRJ.tif28	CpC_OE	5368	474	0.088301
230719_DMI4_8_R3D_D3D_PRJ.tif	28	230719_DMI4_8_R3D_D3D_PRJ.tif28	CpC_OE	11139	1006	0.0903133
230727_DMI8_19_R3D_D3D_PRJ.tif	28	230727_DMI8_19_R3D_D3D_PRJ.tif28	CpC_OE	8215	756	0.0920268
230721_DMI4_12_R3D_D3D_PRJ.tif	28	230721_DMI4_12_R3D_D3D_PRJ.tif28	CpC_OE	19050	1777	0.0932808
230721_DMI3_9_R3D_D3D_PRJ.tif	28	230721_DMI3_9_R3D_D3D_PRJ.tif28	CpC_OE	9017	892	0.0989243
230721_DMI3_1_R3D_D3D_PRJ.tif	28	230721_DMI3_1_R3D_D3D_PRJ.tif28	CpC_OE	9808	980	0.0999184
230721_DMI3_17_R3D_D3D_PRJ.tif	28	230721_DMI3_17_R3D_D3D_PRJ.tif28	CpC_OE	4659	540	0.115905
230721_DMI4_17_R3D_D3D_PRJ.tif	28	230721_DMI4_17_R3D_D3D_PRJ.tif28	CpC_OE	6550	769	0.117405
230719_DMI3_6_R3D_D3D_PRJ.tif	28	230719_DMI3_6_R3D_D3D_PRJ.tif28	CpC_OE	27929	3567	0.127717
230721_DMI4_16_R3D_D3D_PRJ.tif	28	230721_DMI4_16_R3D_D3D_PRJ.tif28	CpC_OE	1781	243	0.13644
230721_DMI3_23_R3D_D3D_PRJ.tif	28	230721_DMI3_23_R3D_D3D_PRJ.tif28	CpC_OE	2958	422	0.142664
230721_DMI3_18_R3D_D3D_PRJ.tif	28	230721_DMI3_18_R3D_D3D_PRJ.tif28	CpC_OE	5944	910	0.153096
230721_DMI4_19_R3D_D3D_PRJ.tif	28	230721_DMI4_19_R3D_D3D_PRJ.tif28	CpC_OE	12551	1966	0.156641
230727_DMI8_03_R3D_D3D_PRJ.tif	28	230727_DMI8_03_R3D_D3D_PRJ.tif28	CpC_OE	8145	1298	0.159362
230719_DMI3_5_R3D_D3D_PRJ.tif	28	230719_DMI3_5_R3D_D3D_PRJ.tif28	CpC_OE	6172	1011	0.163804
230727_DMI8_12_R3D_D3D_PRJ.tif	28	230727_DMI8_12_R3D_D3D_PRJ.tif28	CpC_OE	10369	1852	0.178609
230721_DMI3_14_R3D_D3D_PRJ.tif	28	230721_DMI3_14_R3D_D3D_PRJ.tif28	CpC_OE	3731	772	0.206915
230721_DMI3_11_R3D_D3D_PRJ.tif	28	230721_DMI3_11_R3D_D3D_PRJ.tif28	CpC_OE	5841	1209	0.206985
230719_DMI3_3_R3D_D3D_PRJ.tif	28	230719_DMI3_3_R3D_D3D_PRJ.tif28	CpC_OE	2130	476	0.223474
230719_DMI4_7_R3D_D3D_PRJ.tif	28	230719_DMI4_7_R3D_D3D_PRJ.tif28	CpC_OE	5050	1154	0.228515
230721_DMI4_4_R3D_D3D_PRJ.tif	28	230721_DMI4_4_R3D_D3D_PRJ.tif28	CpC_OE	3821	878	0.229783
230721_DMI3_2_R3D_D3D_PRJ.tif	28	230721_DMI3_2_R3D_D3D_PRJ.tif28	CpC_OE	5080	1204	0.237008
230721_DMI4_22_R3D_D3D_PRJ.tif	28	230721_DMI4_22_R3D_D3D_PRJ.tif28	CpC_OE	7236	2038	0.281647
230721_DMI4_11_R3D_D3D_PRJ.tif	28	230721_DMI4_11_R3D_D3D_PRJ.tif28	CpC_OE	9252	2650	0.286425
230727_DMI8_11_R3D_D3D_PRJ.tif	28	230727_DMI8_11_R3D_D3D_PRJ.tif28	CpC_OE	6775	1957	0.288856
230727_DMI8_18_R3D_D3D_PRJ.tif	28	230727_DMI8_18_R3D_D3D_PRJ.tif28	CpC_OE	11518	3821	0.331742
230727_DMI8_04_R3D_D3D_PRJ.tif	28	230727_DMI8_04_R3D_D3D_PRJ.tif28	CpC_OE	5242	1933	0.368752
230719_DMI3_9_R3D_D3D_PRJ.tif	29	230719_DMI3_9_R3D_D3D_PRJ.tif29	CpC_OE	14506	157	0.0108231
230721_DMI3_8_R3D_D3D_PRJ.tif	29	230721_DMI3_8_R3D_D3D_PRJ.tif29	CpC_OE	25642	478	0.0186413
230719_DMI4_7_R3D_D3D_PRJ.tif	29	230719_DMI4_7_R3D_D3D_PRJ.tif29	CpC_OE	19546	430	0.0219994
230721_DMI3_16_R3D_D3D_PRJ.tif	29	230721_DMI3_16_R3D_D3D_PRJ.tif29	CpC_OE	19486	492	0.0252489
230719_DMI3_1_R3D_D3D_PRJ.tif	29	230719_DMI3_1_R3D_D3D_PRJ.tif29	CpC_OE	13865	393	0.0283448
230719_DMI3_4_R3D_D3D_PRJ.tif	29	230719_DMI3_4_R3D_D3D_PRJ.tif29	CpC_OE	32299	960	0.0297223
230721_DMI3_6_R3D_D3D_PRJ.tif	29	230721_DMI3_6_R3D_D3D_PRJ.tif29	CpC_OE	17426	552	0.0316768
230721_DMI3_10_R3D_D3D_PRJ.tif	29	230721_DMI3_10_R3D_D3D_PRJ.tif29	CpC_OE	12436	467	0.0375523
230721_DMI3_17_R3D_D3D_PRJ.tif	29	230721_DMI3_17_R3D_D3D_PRJ.tif29	CpC_OE	10048	443	0.0440884
230721_DMI3_21_R3D_D3D_PRJ.tif	29	230721_DMI3_21_R3D_D3D_PRJ.tif29	CpC_OE	8163	384	0.0470415
230721_DMI4_20_R3D_D3D_PRJ.tif	29	230721_DMI4_20_R3D_D3D_PRJ.tif29	CpC_OE	7203	347	0.0481744
230721_DMI3_18_R3D_D3D_PRJ.tif	29	230721_DMI3_18_R3D_D3D_PRJ.tif29	CpC_OE	19811	985	0.0497199
230721_DMI4_21_R3D_D3D_PRJ.tif	29	230721_DMI4_21_R3D_D3D_PRJ.tif29	CpC_OE	11183	557	0.0498077
230727_DMI8_06_R3D_D3D_PRJ.tif	29	230727_DMI8_06_R3D_D3D_PRJ.tif29	CpC_OE	11767	637	0.0541344
230727_DMI8_01_R3D_D3D_PRJ.tif	29	230727_DMI8_01_R3D_D3D_PRJ.tif29	CpC_OE	9235	547	0.0592312
230719_DMI4_8_R3D_D3D_PRJ.tif	29	230719_DMI4_8_R3D_D3D_PRJ.tif29	CpC_OE	11129	709	0.0637074
230721_DMI3_22_R3D_D3D_PRJ.tif	29	230721_DMI3_22_R3D_D3D_PRJ.tif29	CpC_OE	4395	301	0.0684869
230721_DMI3_13_R3D_D3D_PRJ.tif	29	230721_DMI3_13_R3D_D3D_PRJ.tif29	CpC_OE	11975	846	0.0706472
230719_DMI4_5_R3D_D3D_PRJ.tif	29	230719_DMI4_5_R3D_D3D_PRJ.tif29	CpC_OE	13563	1014	0.0747622
230727_DMI8_04_R3D_D3D_PRJ.tif	29	230727_DMI8_04_R3D_D3D_PRJ.tif29	CpC_OE	2862	216	0.0754717
230721_DMI4_6_R3D_D3D_PRJ.tif	29	230721_DMI4_6_R3D_D3D_PRJ.tif29	CpC_OE	12256	1011	0.0824902
230721_DMI3_1_R3D_D3D_PRJ.tif	29	230721_DMI3_1_R3D_D3D_PRJ.tif29	CpC_OE	14553	1211	0.0832131
230721_DMI4_7_R3D_D3D_PRJ.tif	29	230721_DMI4_7_R3D_D3D_PRJ.tif29	CpC_OE	5202	447	0.0859285
230719_DMI3_8_R3D_D3D_PRJ.tif	29	230719_DMI3_8_R3D_D3D_PRJ.tif29	CpC_OE	6573	583	0.0886962
230721_DMI4_4_R3D_D3D_PRJ.tif	29	230721_DMI4_4_R3D_D3D_PRJ.tif29	CpC_OE	5550	529	0.0953153
230719_DMI3_3_R3D_D3D_PRJ.tif	29	230719_DMI3_3_R3D_D3D_PRJ.tif29	CpC_OE	8842	852	0.0963583
230719_DMI4_4_R3D_D3D_PRJ.tif	29	230719_DMI4_4_R3D_D3D_PRJ.tif29	CpC_OE	13912	1348	0.0968948
230727_DMI8_03_R3D_D3D_PRJ.tif	29	230727_DMI8_03_R3D_D3D_PRJ.tif29	CpC_OE	12495	1359	0.108764
230721_DMI3_14_R3D_D3D_PRJ.tif	29	230721_DMI3_14_R3D_D3D_PRJ.tif29	CpC_OE	6261	740	0.118192
230721_DMI4_5_R3D_D3D_PRJ.tif	29	230721_DMI4_5_R3D_D3D_PRJ.tif29	CpC_OE	5432	658	0.121134
230727_DMI8_13_R3D_D3D_PRJ.tif	29	230727_DMI8_13_R3D_D3D_PRJ.tif29	CpC_OE	14392	1863	0.129447
230719_DMI4_3_R3D_D3D_PRJ.tif	29	230719_DMI4_3_R3D_D3D_PRJ.tif29	CpC_OE	8096	1120	0.13834
230727_DMI8_12_R3D_D3D_PRJ.tif	29	230727_DMI8_12_R3D_D3D_PRJ.tif29	CpC_OE	12019	1692	0.140777
230719_DMI3_2_R3D_D3D_PRJ.tif	29	230719_DMI3_2_R3D_D3D_PRJ.tif29	CpC_OE	9067	1352	0.149112
230721_DMI4_12_R3D_D3D_PRJ.tif	29	230721_DMI4_12_R3D_D3D_PRJ.tif29	CpC_OE	5164	805	0.155887
230721_DMI3_25_R3D_D3D_PRJ.tif	29	230721_DMI3_25_R3D_D3D_PRJ.tif29	CpC_OE	2853	519	0.181914
230721_DMI4_11_R3D_D3D_PRJ.tif	29	230721_DMI4_11_R3D_D3D_PRJ.tif29	CpC_OE	4933	946	0.19177
230727_DMI8_11_R3D_D3D_PRJ.tif	29	230727_DMI8_11_R3D_D3D_PRJ.tif29	CpC_OE	12220	2402	0.196563
230721_DMI4_22_R3D_D3D_PRJ.tif	29	230721_DMI4_22_R3D_D3D_PRJ.tif29	CpC_OE	8415	1655	0.196673
230721_DMI4_19_R3D_D3D_PRJ.tif	29	230721_DMI4_19_R3D_D3D_PRJ.tif29	CpC_OE	12265	2429	0.198043
230727_DMI8_08_R3D_D3D_PRJ.tif	29	230727_DMI8_08_R3D_D3D_PRJ.tif29	CpC_OE	3658	734	0.200656
230721_DMI4_16_R3D_D3D_PRJ.tif	29	230721_DMI4_16_R3D_D3D_PRJ.tif29	CpC_OE	3404	715	0.210047
230721_DMI4_13_R3D_D3D_PRJ.tif	29	230721_DMI4_13_R3D_D3D_PRJ.tif29	CpC_OE	11393	2513	0.220574
230719_DMI3_6_R3D_D3D_PRJ.tif	29	230719_DMI3_6_R3D_D3D_PRJ.tif29	CpC_OE	7046	1568	0.222538
230727_DMI8_10_R3D_D3D_PRJ.tif	29	230727_DMI8_10_R3D_D3D_PRJ.tif29	CpC_OE	11249	2744	0.243933
230721_DMI3_11_R3D_D3D_PRJ.tif	29	230721_DMI3_11_R3D_D3D_PRJ.tif29	CpC_OE	5639	1376	0.244015
230727_DMI8_15_R3D_D3D_PRJ.tif	29	230727_DMI8_15_R3D_D3D_PRJ.tif29	CpC_OE	7850	1924	0.245096
230721_DMI3_23_R3D_D3D_PRJ.tif	29	230721_DMI3_23_R3D_D3D_PRJ.tif29	CpC_OE	2283	589	0.257994
230721_DMI4_10_R3D_D3D_PRJ.tif	29	230721_DMI4_10_R3D_D3D_PRJ.tif29	CpC_OE	3797	1055	0.277851
230719_DMI4_2_R3D_D3D_PRJ.tif	29	230719_DMI4_2_R3D_D3D_PRJ.tif29	CpC_OE	6936	1950	0.281142
230727_DMI8_18_R3D_D3D_PRJ.tif	29	230727_DMI8_18_R3D_D3D_PRJ.tif29	CpC_OE	9294	2826	0.304067
230721_DMI3_14_R3D_D3D_PRJ.tif	30	230721_DMI3_14_R3D_D3D_PRJ.tif30	CpC_OE	19071	401	0.0210267
230719_DMI3_1_R3D_D3D_PRJ.tif	30	230719_DMI3_1_R3D_D3D_PRJ.tif30	CpC_OE	9276	248	0.0267357
230719_DMI3_2_R3D_D3D_PRJ.tif	30	230719_DMI3_2_R3D_D3D_PRJ.tif30	CpC_OE	21207	678	0.0319706
230721_DMI3_16_R3D_D3D_PRJ.tif	30	230721_DMI3_16_R3D_D3D_PRJ.tif30	CpC_OE	25636	832	0.0324544
230721_DMI3_11_R3D_D3D_PRJ.tif	30	230721_DMI3_11_R3D_D3D_PRJ.tif30	CpC_OE	13639	458	0.0335802
230721_DMI4_13_R3D_D3D_PRJ.tif	30	230721_DMI4_13_R3D_D3D_PRJ.tif30	CpC_OE	11477	394	0.0343295
230721_DMI4_16_R3D_D3D_PRJ.tif	30	230721_DMI4_16_R3D_D3D_PRJ.tif30	CpC_OE	8410	291	0.0346017
230727_DMI8_12_R3D_D3D_PRJ.tif	30	230727_DMI8_12_R3D_D3D_PRJ.tif30	CpC_OE	12229	427	0.034917
230719_DMI4_8_R3D_D3D_PRJ.tif	30	230719_DMI4_8_R3D_D3D_PRJ.tif30	CpC_OE	11503	406	0.0352951
230719_DMI3_9_R3D_D3D_PRJ.tif	30	230719_DMI3_9_R3D_D3D_PRJ.tif30	CpC_OE	5610	200	0.0356506
230721_DMI4_7_R3D_D3D_PRJ.tif	30	230721_DMI4_7_R3D_D3D_PRJ.tif30	CpC_OE	6778	297	0.0438182
230721_DMI3_4_R3D_D3D_PRJ.tif	30	230721_DMI3_4_R3D_D3D_PRJ.tif30	CpC_OE	17315	812	0.0468958
230719_DMI3_5_R3D_D3D_PRJ.tif	30	230719_DMI3_5_R3D_D3D_PRJ.tif30	CpC_OE	20352	965	0.0474155
230727_DMI8_04_R3D_D3D_PRJ.tif	30	230727_DMI8_04_R3D_D3D_PRJ.tif30	CpC_OE	18993	940	0.0494919
230721_DMI4_6_R3D_D3D_PRJ.tif	30	230721_DMI4_6_R3D_D3D_PRJ.tif30	CpC_OE	7934	397	0.0500378
230721_DMI4_4_R3D_D3D_PRJ.tif	30	230721_DMI4_4_R3D_D3D_PRJ.tif30	CpC_OE	16540	948	0.0573156
230721_DMI3_7_R3D_D3D_PRJ.tif	30	230721_DMI3_7_R3D_D3D_PRJ.tif30	CpC_OE	9723	568	0.0584182
230721_DMI4_21_R3D_D3D_PRJ.tif	30	230721_DMI4_21_R3D_D3D_PRJ.tif30	CpC_OE	19520	1148	0.0588115
230719_DMI3_8_R3D_D3D_PRJ.tif	30	230719_DMI3_8_R3D_D3D_PRJ.tif30	CpC_OE	7349	457	0.0621853
230721_DMI3_2_R3D_D3D_PRJ.tif	30	230721_DMI3_2_R3D_D3D_PRJ.tif30	CpC_OE	9697	634	0.065381
230721_DMI3_18_R3D_D3D_PRJ.tif	30	230721_DMI3_18_R3D_D3D_PRJ.tif30	CpC_OE	3378	225	0.0666075
230727_DMI8_17_R3D_D3D_PRJ.tif	30	230727_DMI8_17_R3D_D3D_PRJ.tif30	CpC_OE	4941	332	0.0671929
230721_DMI4_20_R3D_D3D_PRJ.tif	30	230721_DMI4_20_R3D_D3D_PRJ.tif30	CpC_OE	8290	562	0.0677925
230721_DMI3_23_R3D_D3D_PRJ.tif	30	230721_DMI3_23_R3D_D3D_PRJ.tif30	CpC_OE	6607	469	0.0709853
230721_DMI3_17_R3D_D3D_PRJ.tif	30	230721_DMI3_17_R3D_D3D_PRJ.tif30	CpC_OE	6991	497	0.0710914
230727_DMI8_08_R3D_D3D_PRJ.tif	30	230727_DMI8_08_R3D_D3D_PRJ.tif30	CpC_OE	16745	1332	0.0795461
230721_DMI3_8_R3D_D3D_PRJ.tif	30	230721_DMI3_8_R3D_D3D_PRJ.tif30	CpC_OE	9335	770	0.0824853
230727_DMI8_01_R3D_D3D_PRJ.tif	30	230727_DMI8_01_R3D_D3D_PRJ.tif30	CpC_OE	9867	904	0.0916185
230719_DMI4_2_R3D_D3D_PRJ.tif	30	230719_DMI4_2_R3D_D3D_PRJ.tif30	CpC_OE	20878	2152	0.103075
230727_DMI8_03_R3D_D3D_PRJ.tif	30	230727_DMI8_03_R3D_D3D_PRJ.tif30	CpC_OE	8088	890	0.11004
230719_DMI4_3_R3D_D3D_PRJ.tif	30	230719_DMI4_3_R3D_D3D_PRJ.tif30	CpC_OE	11806	1317	0.111553
230727_DMI8_15_R3D_D3D_PRJ.tif	30	230727_DMI8_15_R3D_D3D_PRJ.tif30	CpC_OE	10577	1233	0.116574
230719_DMI3_4_R3D_D3D_PRJ.tif	30	230719_DMI3_4_R3D_D3D_PRJ.tif30	CpC_OE	6489	774	0.119279
230721_DMI3_6_R3D_D3D_PRJ.tif	30	230721_DMI3_6_R3D_D3D_PRJ.tif30	CpC_OE	3716	465	0.125135
230721_DMI3_21_R3D_D3D_PRJ.tif	30	230721_DMI3_21_R3D_D3D_PRJ.tif30	CpC_OE	5499	741	0.134752
230727_DMI8_02_R3D_D3D_PRJ.tif	30	230727_DMI8_02_R3D_D3D_PRJ.tif30	CpC_OE	12799	1765	0.137901
230721_DMI4_12_R3D_D3D_PRJ.tif	30	230721_DMI4_12_R3D_D3D_PRJ.tif30	CpC_OE	9650	1337	0.138549
230719_DMI3_3_R3D_D3D_PRJ.tif	30	230719_DMI3_3_R3D_D3D_PRJ.tif30	CpC_OE	6009	849	0.141288
230721_DMI4_5_R3D_D3D_PRJ.tif	30	230721_DMI4_5_R3D_D3D_PRJ.tif30	CpC_OE	14440	2078	0.143906
230721_DMI3_22_R3D_D3D_PRJ.tif	30	230721_DMI3_22_R3D_D3D_PRJ.tif30	CpC_OE	3709	559	0.150714
230727_DMI8_06_R3D_D3D_PRJ.tif	30	230727_DMI8_06_R3D_D3D_PRJ.tif30	CpC_OE	9741	1472	0.151114
230721_DMI3_25_R3D_D3D_PRJ.tif	30	230721_DMI3_25_R3D_D3D_PRJ.tif30	CpC_OE	4566	711	0.155716
230721_DMI4_22_R3D_D3D_PRJ.tif	30	230721_DMI4_22_R3D_D3D_PRJ.tif30	CpC_OE	5257	858	0.163211
230721_DMI4_17_R3D_D3D_PRJ.tif	30	230721_DMI4_17_R3D_D3D_PRJ.tif30	CpC_OE	5260	879	0.16711
230721_DMI4_14_R3D_D3D_PRJ.tif	30	230721_DMI4_14_R3D_D3D_PRJ.tif30	CpC_OE	6092	1049	0.172193
230727_DMI8_11_R3D_D3D_PRJ.tif	30	230727_DMI8_11_R3D_D3D_PRJ.tif30	CpC_OE	12405	2206	0.177832
230721_DMI3_1_R3D_D3D_PRJ.tif	30	230721_DMI3_1_R3D_D3D_PRJ.tif30	CpC_OE	5122	952	0.185865
230727_DMI8_13_R3D_D3D_PRJ.tif	30	230727_DMI8_13_R3D_D3D_PRJ.tif30	CpC_OE	14984	2828	0.188735
230721_DMI4_11_R3D_D3D_PRJ.tif	30	230721_DMI4_11_R3D_D3D_PRJ.tif30	CpC_OE	9549	1816	0.190177
230727_DMI8_19_R3D_D3D_PRJ.tif	30	230727_DMI8_19_R3D_D3D_PRJ.tif30	CpC_OE	7056	1348	0.191043
230721_DMI3_13_R3D_D3D_PRJ.tif	30	230721_DMI3_13_R3D_D3D_PRJ.tif30	CpC_OE	2907	568	0.19539
230721_DMI3_3_R3D_D3D_PRJ.tif	30	230721_DMI3_3_R3D_D3D_PRJ.tif30	CpC_OE	23020	4621	0.200738
230721_DMI4_10_R3D_D3D_PRJ.tif	30	230721_DMI4_10_R3D_D3D_PRJ.tif30	CpC_OE	5595	1159	0.207149
230719_DMI4_4_R3D_D3D_PRJ.tif	30	230719_DMI4_4_R3D_D3D_PRJ.tif30	CpC_OE	7085	1552	0.219054
230721_DMI3_10_R3D_D3D_PRJ.tif	30	230721_DMI3_10_R3D_D3D_PRJ.tif30	CpC_OE	2993	668	0.223187
230721_DMI3_9_R3D_D3D_PRJ.tif	30	230721_DMI3_9_R3D_D3D_PRJ.tif30	CpC_OE	5952	1697	0.285114
230721_DMI4_19_R3D_D3D_PRJ.tif	30	230721_DMI4_19_R3D_D3D_PRJ.tif30	CpC_OE	6305	1982	0.314354
230719_DMI3_6_R3D_D3D_PRJ.tif	30	230719_DMI3_6_R3D_D3D_PRJ.tif30	CpC_OE	5675	1963	0.345903
230727_DMI8_18_R3D_D3D_PRJ.tif	30	230727_DMI8_18_R3D_D3D_PRJ.tif30	CpC_OE	9093	3178	0.3495
230721_DMI4_15_R3D_D3D_PRJ.tif	30	230721_DMI4_15_R3D_D3D_PRJ.tif30	CpC_OE	14895	5507	0.369721
230719_DMI4_8_R3D_D3D_PRJ.tif	31	230719_DMI4_8_R3D_D3D_PRJ.tif31	CpC_OE	23528	509	0.0216338
230721_DMI4_17_R3D_D3D_PRJ.tif	31	230721_DMI4_17_R3D_D3D_PRJ.tif31	CpC_OE	8732	210	0.0240495
230721_DMI3_18_R3D_D3D_PRJ.tif	31	230721_DMI3_18_R3D_D3D_PRJ.tif31	CpC_OE	11188	282	0.0252056
230719_DMI3_4_R3D_D3D_PRJ.tif	31	230719_DMI3_4_R3D_D3D_PRJ.tif31	CpC_OE	16376	428	0.0261358
230719_DMI3_9_R3D_D3D_PRJ.tif	31	230719_DMI3_9_R3D_D3D_PRJ.tif31	CpC_OE	9208	262	0.0284535
230721_DMI3_14_R3D_D3D_PRJ.tif	31	230721_DMI3_14_R3D_D3D_PRJ.tif31	CpC_OE	14600	422	0.0289041
230727_DMI8_08_R3D_D3D_PRJ.tif	31	230727_DMI8_08_R3D_D3D_PRJ.tif31	CpC_OE	21165	648	0.0306166
230721_DMI3_11_R3D_D3D_PRJ.tif	31	230721_DMI3_11_R3D_D3D_PRJ.tif31	CpC_OE	6212	222	0.0357373
230721_DMI3_16_R3D_D3D_PRJ.tif	31	230721_DMI3_16_R3D_D3D_PRJ.tif31	CpC_OE	19069	694	0.0363941
230721_DMI4_13_R3D_D3D_PRJ.tif	31	230721_DMI4_13_R3D_D3D_PRJ.tif31	CpC_OE	10711	427	0.0398656
230719_DMI3_1_R3D_D3D_PRJ.tif	31	230719_DMI3_1_R3D_D3D_PRJ.tif31	CpC_OE	9985	405	0.0405608
230721_DMI3_2_R3D_D3D_PRJ.tif	31	230721_DMI3_2_R3D_D3D_PRJ.tif31	CpC_OE	16436	680	0.0413726
230721_DMI3_8_R3D_D3D_PRJ.tif	31	230721_DMI3_8_R3D_D3D_PRJ.tif31	CpC_OE	13917	582	0.0418194
230721_DMI3_13_R3D_D3D_PRJ.tif	31	230721_DMI3_13_R3D_D3D_PRJ.tif31	CpC_OE	14019	667	0.0475783
230721_DMI4_16_R3D_D3D_PRJ.tif	31	230721_DMI4_16_R3D_D3D_PRJ.tif31	CpC_OE	5777	292	0.0505453
230719_DMI4_3_R3D_D3D_PRJ.tif	31	230719_DMI4_3_R3D_D3D_PRJ.tif31	CpC_OE	21237	1080	0.0508546
230727_DMI8_11_R3D_D3D_PRJ.tif	31	230727_DMI8_11_R3D_D3D_PRJ.tif31	CpC_OE	13196	701	0.0531222
230721_DMI3_17_R3D_D3D_PRJ.tif	31	230721_DMI3_17_R3D_D3D_PRJ.tif31	CpC_OE	5738	313	0.0545486
230727_DMI8_15_R3D_D3D_PRJ.tif	31	230727_DMI8_15_R3D_D3D_PRJ.tif31	CpC_OE	7074	395	0.0558383
230727_DMI8_03_R3D_D3D_PRJ.tif	31	230727_DMI8_03_R3D_D3D_PRJ.tif31	CpC_OE	7270	409	0.0562586
230719_DMI3_8_R3D_D3D_PRJ.tif	31	230719_DMI3_8_R3D_D3D_PRJ.tif31	CpC_OE	8717	503	0.0577033
230719_DMI3_2_R3D_D3D_PRJ.tif	31	230719_DMI3_2_R3D_D3D_PRJ.tif31	CpC_OE	18219	1111	0.0609803
230721_DMI4_7_R3D_D3D_PRJ.tif	31	230721_DMI4_7_R3D_D3D_PRJ.tif31	CpC_OE	7974	527	0.0660898
230721_DMI3_7_R3D_D3D_PRJ.tif	31	230721_DMI3_7_R3D_D3D_PRJ.tif31	CpC_OE	4584	389	0.0848604
230721_DMI3_4_R3D_D3D_PRJ.tif	31	230721_DMI3_4_R3D_D3D_PRJ.tif31	CpC_OE	26643	2346	0.0880531
230721_DMI4_4_R3D_D3D_PRJ.tif	31	230721_DMI4_4_R3D_D3D_PRJ.tif31	CpC_OE	4855	451	0.0928939
230727_DMI8_17_R3D_D3D_PRJ.tif	31	230727_DMI8_17_R3D_D3D_PRJ.tif31	CpC_OE	5572	557	0.0999641
230727_DMI8_13_R3D_D3D_PRJ.tif	31	230727_DMI8_13_R3D_D3D_PRJ.tif31	CpC_OE	13102	1311	0.100061
230721_DMI3_3_R3D_D3D_PRJ.tif	31	230721_DMI3_3_R3D_D3D_PRJ.tif31	CpC_OE	10817	1130	0.104465
230721_DMI3_21_R3D_D3D_PRJ.tif	31	230721_DMI3_21_R3D_D3D_PRJ.tif31	CpC_OE	2878	337	0.117095
230719_DMI3_5_R3D_D3D_PRJ.tif	31	230719_DMI3_5_R3D_D3D_PRJ.tif31	CpC_OE	13071	1586	0.121337
230721_DMI3_25_R3D_D3D_PRJ.tif	31	230721_DMI3_25_R3D_D3D_PRJ.tif31	CpC_OE	3864	471	0.121894
230719_DMI3_3_R3D_D3D_PRJ.tif	31	230719_DMI3_3_R3D_D3D_PRJ.tif31	CpC_OE	6099	754	0.123627
230727_DMI8_06_R3D_D3D_PRJ.tif	31	230727_DMI8_06_R3D_D3D_PRJ.tif31	CpC_OE	16114	2001	0.124178
230721_DMI4_6_R3D_D3D_PRJ.tif	31	230721_DMI4_6_R3D_D3D_PRJ.tif31	CpC_OE	9113	1201	0.13179
230721_DMI4_20_R3D_D3D_PRJ.tif	31	230721_DMI4_20_R3D_D3D_PRJ.tif31	CpC_OE	3422	472	0.137931
230727_DMI8_01_R3D_D3D_PRJ.tif	31	230727_DMI8_01_R3D_D3D_PRJ.tif31	CpC_OE	7421	1055	0.142164
230721_DMI3_9_R3D_D3D_PRJ.tif	31	230721_DMI3_9_R3D_D3D_PRJ.tif31	CpC_OE	13862	1986	0.143269
230727_DMI8_04_R3D_D3D_PRJ.tif	31	230727_DMI8_04_R3D_D3D_PRJ.tif31	CpC_OE	1747	263	0.150544
230721_DMI3_10_R3D_D3D_PRJ.tif	31	230721_DMI3_10_R3D_D3D_PRJ.tif31	CpC_OE	3232	552	0.170792
230727_DMI8_12_R3D_D3D_PRJ.tif	31	230727_DMI8_12_R3D_D3D_PRJ.tif31	CpC_OE	7809	1423	0.182226
230727_DMI8_18_R3D_D3D_PRJ.tif	31	230727_DMI8_18_R3D_D3D_PRJ.tif31	CpC_OE	8967	1911	0.213115
230721_DMI3_22_R3D_D3D_PRJ.tif	31	230721_DMI3_22_R3D_D3D_PRJ.tif31	CpC_OE	4274	922	0.215723
230721_DMI4_21_R3D_D3D_PRJ.tif	31	230721_DMI4_21_R3D_D3D_PRJ.tif31	CpC_OE	5127	1177	0.229569
230721_DMI4_22_R3D_D3D_PRJ.tif	31	230721_DMI4_22_R3D_D3D_PRJ.tif31	CpC_OE	5434	1264	0.232609
230721_DMI3_1_R3D_D3D_PRJ.tif	31	230721_DMI3_1_R3D_D3D_PRJ.tif31	CpC_OE	5797	1398	0.241159
230721_DMI3_6_R3D_D3D_PRJ.tif	31	230721_DMI3_6_R3D_D3D_PRJ.tif31	CpC_OE	7916	1929	0.243684
230721_DMI4_12_R3D_D3D_PRJ.tif	31	230721_DMI4_12_R3D_D3D_PRJ.tif31	CpC_OE	5792	1412	0.243785
230719_DMI4_4_R3D_D3D_PRJ.tif	31	230719_DMI4_4_R3D_D3D_PRJ.tif31	CpC_OE	8446	2219	0.262728
230721_DMI4_11_R3D_D3D_PRJ.tif	31	230721_DMI4_11_R3D_D3D_PRJ.tif31	CpC_OE	13266	3572	0.26926
230727_DMI8_10_R3D_D3D_PRJ.tif	31	230727_DMI8_10_R3D_D3D_PRJ.tif31	CpC_OE	9521	2799	0.293982
230721_DMI3_23_R3D_D3D_PRJ.tif	31	230721_DMI3_23_R3D_D3D_PRJ.tif31	CpC_OE	4638	1543	0.332687
230721_DMI4_5_R3D_D3D_PRJ.tif	31	230721_DMI4_5_R3D_D3D_PRJ.tif31	CpC_OE	2148	780	0.363128
230721_DMI3_17_R3D_D3D_PRJ.tif	32	230721_DMI3_17_R3D_D3D_PRJ.tif32	CpC_OE	32485	313	0.00963522
230719_DMI3_9_R3D_D3D_PRJ.tif	32	230719_DMI3_9_R3D_D3D_PRJ.tif32	CpC_OE	12578	212	0.0168548
230721_DMI3_14_R3D_D3D_PRJ.tif	32	230721_DMI3_14_R3D_D3D_PRJ.tif32	CpC_OE	22358	490	0.0219161
230721_DMI3_7_R3D_D3D_PRJ.tif	32	230721_DMI3_7_R3D_D3D_PRJ.tif32	CpC_OE	10676	280	0.0262271
230727_DMI8_04_R3D_D3D_PRJ.tif	32	230727_DMI8_04_R3D_D3D_PRJ.tif32	CpC_OE	14505	399	0.0275078
230719_DMI3_4_R3D_D3D_PRJ.tif	32	230719_DMI3_4_R3D_D3D_PRJ.tif32	CpC_OE	15667	456	0.0291058
230721_DMI3_25_R3D_D3D_PRJ.tif	32	230721_DMI3_25_R3D_D3D_PRJ.tif32	CpC_OE	18328	623	0.0339917
230721_DMI3_18_R3D_D3D_PRJ.tif	32	230721_DMI3_18_R3D_D3D_PRJ.tif32	CpC_OE	10741	374	0.0348198
230721_DMI3_11_R3D_D3D_PRJ.tif	32	230721_DMI3_11_R3D_D3D_PRJ.tif32	CpC_OE	19442	718	0.0369304
230721_DMI3_22_R3D_D3D_PRJ.tif	32	230721_DMI3_22_R3D_D3D_PRJ.tif32	CpC_OE	10549	417	0.0395298
230719_DMI3_8_R3D_D3D_PRJ.tif	32	230719_DMI3_8_R3D_D3D_PRJ.tif32	CpC_OE	16518	734	0.0444364
230727_DMI8_13_R3D_D3D_PRJ.tif	32	230727_DMI8_13_R3D_D3D_PRJ.tif32	CpC_OE	12448	563	0.0452281
230721_DMI4_17_R3D_D3D_PRJ.tif	32	230721_DMI4_17_R3D_D3D_PRJ.tif32	CpC_OE	10586	517	0.0488381
230727_DMI8_17_R3D_D3D_PRJ.tif	32	230727_DMI8_17_R3D_D3D_PRJ.tif32	CpC_OE	10327	538	0.0520964
230727_DMI8_11_R3D_D3D_PRJ.tif	32	230727_DMI8_11_R3D_D3D_PRJ.tif32	CpC_OE	9954	525	0.0527426
230721_DMI3_6_R3D_D3D_PRJ.tif	32	230721_DMI3_6_R3D_D3D_PRJ.tif32	CpC_OE	11742	637	0.0542497
230721_DMI4_6_R3D_D3D_PRJ.tif	32	230721_DMI4_6_R3D_D3D_PRJ.tif32	CpC_OE	6911	394	0.0570106
230719_DMI3_2_R3D_D3D_PRJ.tif	32	230719_DMI3_2_R3D_D3D_PRJ.tif32	CpC_OE	8118	463	0.0570338
230721_DMI3_23_R3D_D3D_PRJ.tif	32	230721_DMI3_23_R3D_D3D_PRJ.tif32	CpC_OE	8154	466	0.0571499
230719_DMI4_3_R3D_D3D_PRJ.tif	32	230719_DMI4_3_R3D_D3D_PRJ.tif32	CpC_OE	20470	1244	0.0607719
230719_DMI4_8_R3D_D3D_PRJ.tif	32	230719_DMI4_8_R3D_D3D_PRJ.tif32	CpC_OE	9246	614	0.0664071
230721_DMI3_13_R3D_D3D_PRJ.tif	32	230721_DMI3_13_R3D_D3D_PRJ.tif32	CpC_OE	10593	705	0.0665534
230721_DMI4_16_R3D_D3D_PRJ.tif	32	230721_DMI4_16_R3D_D3D_PRJ.tif32	CpC_OE	4716	331	0.0701866
230721_DMI3_10_R3D_D3D_PRJ.tif	32	230721_DMI3_10_R3D_D3D_PRJ.tif32	CpC_OE	17603	1245	0.0707266
230721_DMI4_7_R3D_D3D_PRJ.tif	32	230721_DMI4_7_R3D_D3D_PRJ.tif32	CpC_OE	4204	363	0.0863463
230721_DMI4_20_R3D_D3D_PRJ.tif	32	230721_DMI4_20_R3D_D3D_PRJ.tif32	CpC_OE	6384	573	0.0897556
230719_DMI3_1_R3D_D3D_PRJ.tif	32	230719_DMI3_1_R3D_D3D_PRJ.tif32	CpC_OE	5862	532	0.090754
230727_DMI8_08_R3D_D3D_PRJ.tif	32	230727_DMI8_08_R3D_D3D_PRJ.tif32	CpC_OE	4764	444	0.093199
230727_DMI8_19_R3D_D3D_PRJ.tif	32	230727_DMI8_19_R3D_D3D_PRJ.tif32	CpC_OE	13905	1471	0.105789
230721_DMI3_16_R3D_D3D_PRJ.tif	32	230721_DMI3_16_R3D_D3D_PRJ.tif32	CpC_OE	14336	1573	0.109724
230721_DMI3_4_R3D_D3D_PRJ.tif	32	230721_DMI3_4_R3D_D3D_PRJ.tif32	CpC_OE	20039	2225	0.111033
230721_DMI4_5_R3D_D3D_PRJ.tif	32	230721_DMI4_5_R3D_D3D_PRJ.tif32	CpC_OE	7679	865	0.112645
230721_DMI3_8_R3D_D3D_PRJ.tif	32	230721_DMI3_8_R3D_D3D_PRJ.tif32	CpC_OE	7688	939	0.122138
230719_DMI3_6_R3D_D3D_PRJ.tif	32	230719_DMI3_6_R3D_D3D_PRJ.tif32	CpC_OE	12622	1548	0.122643
230719_DMI3_5_R3D_D3D_PRJ.tif	32	230719_DMI3_5_R3D_D3D_PRJ.tif32	CpC_OE	13255	1794	0.135345
230727_DMI8_03_R3D_D3D_PRJ.tif	32	230727_DMI8_03_R3D_D3D_PRJ.tif32	CpC_OE	6818	943	0.13831
230719_DMI3_3_R3D_D3D_PRJ.tif	32	230719_DMI3_3_R3D_D3D_PRJ.tif32	CpC_OE	9376	1397	0.148997
230719_DMI4_2_R3D_D3D_PRJ.tif	32	230719_DMI4_2_R3D_D3D_PRJ.tif32	CpC_OE	20791	3102	0.149199
230719_DMI4_4_R3D_D3D_PRJ.tif	32	230719_DMI4_4_R3D_D3D_PRJ.tif32	CpC_OE	4498	705	0.156736
230721_DMI3_3_R3D_D3D_PRJ.tif	32	230721_DMI3_3_R3D_D3D_PRJ.tif32	CpC_OE	9195	1447	0.157368
230721_DMI4_4_R3D_D3D_PRJ.tif	32	230721_DMI4_4_R3D_D3D_PRJ.tif32	CpC_OE	6619	1139	0.17208
230727_DMI8_15_R3D_D3D_PRJ.tif	32	230727_DMI8_15_R3D_D3D_PRJ.tif32	CpC_OE	9077	1634	0.180015
230721_DMI4_21_R3D_D3D_PRJ.tif	32	230721_DMI4_21_R3D_D3D_PRJ.tif32	CpC_OE	10963	2046	0.186628
230721_DMI3_9_R3D_D3D_PRJ.tif	32	230721_DMI3_9_R3D_D3D_PRJ.tif32	CpC_OE	14227	2836	0.199339
230721_DMI3_2_R3D_D3D_PRJ.tif	32	230721_DMI3_2_R3D_D3D_PRJ.tif32	CpC_OE	6025	1214	0.201494
230727_DMI8_06_R3D_D3D_PRJ.tif	32	230727_DMI8_06_R3D_D3D_PRJ.tif32	CpC_OE	3774	805	0.213302
230721_DMI4_22_R3D_D3D_PRJ.tif	32	230721_DMI4_22_R3D_D3D_PRJ.tif32	CpC_OE	8322	1794	0.215573
230721_DMI3_1_R3D_D3D_PRJ.tif	32	230721_DMI3_1_R3D_D3D_PRJ.tif32	CpC_OE	8807	1994	0.226411
230721_DMI4_14_R3D_D3D_PRJ.tif	32	230721_DMI4_14_R3D_D3D_PRJ.tif32	CpC_OE	7378	1896	0.25698
230721_DMI4_10_R3D_D3D_PRJ.tif	32	230721_DMI4_10_R3D_D3D_PRJ.tif32	CpC_OE	4865	1287	0.264543
230727_DMI8_18_R3D_D3D_PRJ.tif	32	230727_DMI8_18_R3D_D3D_PRJ.tif32	CpC_OE	4939	1313	0.265843
230721_DMI3_21_R3D_D3D_PRJ.tif	32	230721_DMI3_21_R3D_D3D_PRJ.tif32	CpC_OE	1733	558	0.321985
230721_DMI4_12_R3D_D3D_PRJ.tif	32	230721_DMI4_12_R3D_D3D_PRJ.tif32	CpC_OE	6209	2157	0.347399
230727_DMI8_02_R3D_D3D_PRJ.tif	32	230727_DMI8_02_R3D_D3D_PRJ.tif32	CpC_OE	4527	1649	0.364259
230721_DMI3_25_R3D_D3D_PRJ.tif	33	230721_DMI3_25_R3D_D3D_PRJ.tif33	CpC_OE	19375	289	0.0149161
230727_DMI8_04_R3D_D3D_PRJ.tif	33	230727_DMI8_04_R3D_D3D_PRJ.tif33	CpC_OE	13141	241	0.0183395
230719_DMI3_1_R3D_D3D_PRJ.tif	33	230719_DMI3_1_R3D_D3D_PRJ.tif33	CpC_OE	15541	333	0.0214272
230721_DMI3_11_R3D_D3D_PRJ.tif	33	230721_DMI3_11_R3D_D3D_PRJ.tif33	CpC_OE	21513	584	0.0271464
230721_DMI3_14_R3D_D3D_PRJ.tif	33	230721_DMI3_14_R3D_D3D_PRJ.tif33	CpC_OE	11112	314	0.0282577
230719_DMI3_4_R3D_D3D_PRJ.tif	33	230719_DMI3_4_R3D_D3D_PRJ.tif33	CpC_OE	9966	295	0.0296006
230719_DMI3_9_R3D_D3D_PRJ.tif	33	230719_DMI3_9_R3D_D3D_PRJ.tif33	CpC_OE	6955	208	0.0299065
230721_DMI3_16_R3D_D3D_PRJ.tif	33	230721_DMI3_16_R3D_D3D_PRJ.tif33	CpC_OE	16558	563	0.0340017
230721_DMI4_16_R3D_D3D_PRJ.tif	33	230721_DMI4_16_R3D_D3D_PRJ.tif33	CpC_OE	6546	240	0.0366636
230721_DMI4_20_R3D_D3D_PRJ.tif	33	230721_DMI4_20_R3D_D3D_PRJ.tif33	CpC_OE	19020	817	0.0429548
230719_DMI3_8_R3D_D3D_PRJ.tif	33	230719_DMI3_8_R3D_D3D_PRJ.tif33	CpC_OE	16719	723	0.0432442
230719_DMI4_5_R3D_D3D_PRJ.tif	33	230719_DMI4_5_R3D_D3D_PRJ.tif33	CpC_OE	18531	893	0.0481895
230721_DMI3_13_R3D_D3D_PRJ.tif	33	230721_DMI3_13_R3D_D3D_PRJ.tif33	CpC_OE	9760	500	0.0512295
230719_DMI4_4_R3D_D3D_PRJ.tif	33	230719_DMI4_4_R3D_D3D_PRJ.tif33	CpC_OE	19372	998	0.0515177
230719_DMI3_5_R3D_D3D_PRJ.tif	33	230719_DMI3_5_R3D_D3D_PRJ.tif33	CpC_OE	21706	1144	0.0527043
230721_DMI4_13_R3D_D3D_PRJ.tif	33	230721_DMI4_13_R3D_D3D_PRJ.tif33	CpC_OE	12445	657	0.0527923
230721_DMI4_22_R3D_D3D_PRJ.tif	33	230721_DMI4_22_R3D_D3D_PRJ.tif33	CpC_OE	11606	682	0.0587627
230727_DMI8_03_R3D_D3D_PRJ.tif	33	230727_DMI8_03_R3D_D3D_PRJ.tif33	CpC_OE	7976	484	0.060682
230721_DMI3_8_R3D_D3D_PRJ.tif	33	230721_DMI3_8_R3D_D3D_PRJ.tif33	CpC_OE	8885	546	0.0614519
230721_DMI3_2_R3D_D3D_PRJ.tif	33	230721_DMI3_2_R3D_D3D_PRJ.tif33	CpC_OE	17557	1106	0.0629948
230721_DMI3_18_R3D_D3D_PRJ.tif	33	230721_DMI3_18_R3D_D3D_PRJ.tif33	CpC_OE	9140	601	0.0657549
230719_DMI4_3_R3D_D3D_PRJ.tif	33	230719_DMI4_3_R3D_D3D_PRJ.tif33	CpC_OE	14160	938	0.0662429
230721_DMI3_17_R3D_D3D_PRJ.tif	33	230721_DMI3_17_R3D_D3D_PRJ.tif33	CpC_OE	5937	407	0.0685531
230727_DMI8_18_R3D_D3D_PRJ.tif	33	230727_DMI8_18_R3D_D3D_PRJ.tif33	CpC_OE	16015	1212	0.0756791
230721_DMI3_15_R3D_D3D_PRJ.tif	33	230721_DMI3_15_R3D_D3D_PRJ.tif33	CpC_OE	12142	940	0.0774172
230727_DMI8_13_R3D_D3D_PRJ.tif	33	230727_DMI8_13_R3D_D3D_PRJ.tif33	CpC_OE	12021	945	0.0786124
230721_DMI3_4_R3D_D3D_PRJ.tif	33	230721_DMI3_4_R3D_D3D_PRJ.tif33	CpC_OE	25571	2052	0.0802472
230727_DMI8_19_R3D_D3D_PRJ.tif	33	230727_DMI8_19_R3D_D3D_PRJ.tif33	CpC_OE	11468	1031	0.0899023
230721_DMI3_23_R3D_D3D_PRJ.tif	33	230721_DMI3_23_R3D_D3D_PRJ.tif33	CpC_OE	6144	584	0.0950521
230721_DMI4_17_R3D_D3D_PRJ.tif	33	230721_DMI4_17_R3D_D3D_PRJ.tif33	CpC_OE	5073	556	0.1096
230721_DMI3_10_R3D_D3D_PRJ.tif	33	230721_DMI3_10_R3D_D3D_PRJ.tif33	CpC_OE	8498	998	0.117439
230721_DMI4_5_R3D_D3D_PRJ.tif	33	230721_DMI4_5_R3D_D3D_PRJ.tif33	CpC_OE	2261	282	0.124724
230719_DMI3_3_R3D_D3D_PRJ.tif	33	230719_DMI3_3_R3D_D3D_PRJ.tif33	CpC_OE	5379	690	0.128277
230721_DMI4_6_R3D_D3D_PRJ.tif	33	230721_DMI4_6_R3D_D3D_PRJ.tif33	CpC_OE	18535	2385	0.128675
230727_DMI8_06_R3D_D3D_PRJ.tif	33	230727_DMI8_06_R3D_D3D_PRJ.tif33	CpC_OE	7985	1122	0.140513
230721_DMI3_9_R3D_D3D_PRJ.tif	33	230721_DMI3_9_R3D_D3D_PRJ.tif33	CpC_OE	14010	2030	0.144897
230727_DMI8_17_R3D_D3D_PRJ.tif	33	230727_DMI8_17_R3D_D3D_PRJ.tif33	CpC_OE	6925	1004	0.144982
230721_DMI4_7_R3D_D3D_PRJ.tif	33	230721_DMI4_7_R3D_D3D_PRJ.tif33	CpC_OE	6278	922	0.146862
230721_DMI4_19_R3D_D3D_PRJ.tif	33	230721_DMI4_19_R3D_D3D_PRJ.tif33	CpC_OE	9729	1450	0.149039
230721_DMI4_21_R3D_D3D_PRJ.tif	33	230721_DMI4_21_R3D_D3D_PRJ.tif33	CpC_OE	5669	845	0.149056
230727_DMI8_08_R3D_D3D_PRJ.tif	33	230727_DMI8_08_R3D_D3D_PRJ.tif33	CpC_OE	5652	910	0.161005
230719_DMI4_8_R3D_D3D_PRJ.tif	33	230719_DMI4_8_R3D_D3D_PRJ.tif33	CpC_OE	4139	691	0.166949
230727_DMI8_02_R3D_D3D_PRJ.tif	33	230727_DMI8_02_R3D_D3D_PRJ.tif33	CpC_OE	7379	1296	0.175634
230721_DMI4_10_R3D_D3D_PRJ.tif	33	230721_DMI4_10_R3D_D3D_PRJ.tif33	CpC_OE	7991	1434	0.179452
230727_DMI8_01_R3D_D3D_PRJ.tif	33	230727_DMI8_01_R3D_D3D_PRJ.tif33	CpC_OE	12684	2417	0.190555
230721_DMI4_12_R3D_D3D_PRJ.tif	33	230721_DMI4_12_R3D_D3D_PRJ.tif33	CpC_OE	10239	2132	0.208223
230721_DMI3_7_R3D_D3D_PRJ.tif	33	230721_DMI3_7_R3D_D3D_PRJ.tif33	CpC_OE	6208	1320	0.212629
230721_DMI3_22_R3D_D3D_PRJ.tif	33	230721_DMI3_22_R3D_D3D_PRJ.tif33	CpC_OE	2745	623	0.226958
230721_DMI4_14_R3D_D3D_PRJ.tif	33	230721_DMI4_14_R3D_D3D_PRJ.tif33	CpC_OE	10569	2543	0.240609
230721_DMI3_3_R3D_D3D_PRJ.tif	33	230721_DMI3_3_R3D_D3D_PRJ.tif33	CpC_OE	15231	3702	0.243057
230721_DMI3_21_R3D_D3D_PRJ.tif	33	230721_DMI3_21_R3D_D3D_PRJ.tif33	CpC_OE	6717	1647	0.245199
230721_DMI3_1_R3D_D3D_PRJ.tif	33	230721_DMI3_1_R3D_D3D_PRJ.tif33	CpC_OE	3507	891	0.254063
230727_DMI8_11_R3D_D3D_PRJ.tif	33	230727_DMI8_11_R3D_D3D_PRJ.tif33	CpC_OE	8259	2198	0.266134
230721_DMI3_6_R3D_D3D_PRJ.tif	33	230721_DMI3_6_R3D_D3D_PRJ.tif33	CpC_OE	7146	1918	0.268402
230727_DMI8_12_R3D_D3D_PRJ.tif	33	230727_DMI8_12_R3D_D3D_PRJ.tif33	CpC_OE	7479	2009	0.268619
230721_DMI4_11_R3D_D3D_PRJ.tif	33	230721_DMI4_11_R3D_D3D_PRJ.tif33	CpC_OE	7500	2153	0.287067
230719_DMI4_2_R3D_D3D_PRJ.tif	33	230719_DMI4_2_R3D_D3D_PRJ.tif33	CpC_OE	14583	5082	0.348488
230721_DMI4_4_R3D_D3D_PRJ.tif	33	230721_DMI4_4_R3D_D3D_PRJ.tif33	CpC_OE	2356	828	0.351443
230719_DMI3_9_R3D_D3D_PRJ.tif	34	230719_DMI3_9_R3D_D3D_PRJ.tif34	CpC_OE	10154	216	0.0212724
230721_DMI3_17_R3D_D3D_PRJ.tif	34	230721_DMI3_17_R3D_D3D_PRJ.tif34	CpC_OE	18108	401	0.0221449
230721_DMI4_17_R3D_D3D_PRJ.tif	34	230721_DMI4_17_R3D_D3D_PRJ.tif34	CpC_OE	14705	461	0.0313499
230727_DMI8_04_R3D_D3D_PRJ.tif	34	230727_DMI8_04_R3D_D3D_PRJ.tif34	CpC_OE	10716	366	0.0341545
230719_DMI3_4_R3D_D3D_PRJ.tif	34	230719_DMI3_4_R3D_D3D_PRJ.tif34	CpC_OE	15875	560	0.0352756
230721_DMI3_14_R3D_D3D_PRJ.tif	34	230721_DMI3_14_R3D_D3D_PRJ.tif34	CpC_OE	15059	641	0.0425659
230719_DMI3_1_R3D_D3D_PRJ.tif	34	230719_DMI3_1_R3D_D3D_PRJ.tif34	CpC_OE	12925	570	0.0441006
230721_DMI4_4_R3D_D3D_PRJ.tif	34	230721_DMI4_4_R3D_D3D_PRJ.tif34	CpC_OE	9874	478	0.04841
230721_DMI3_8_R3D_D3D_PRJ.tif	34	230721_DMI3_8_R3D_D3D_PRJ.tif34	CpC_OE	12329	612	0.0496391
230719_DMI3_8_R3D_D3D_PRJ.tif	34	230719_DMI3_8_R3D_D3D_PRJ.tif34	CpC_OE	11637	647	0.0555985
230721_DMI4_10_R3D_D3D_PRJ.tif	34	230721_DMI4_10_R3D_D3D_PRJ.tif34	CpC_OE	8614	503	0.0583933
230721_DMI4_16_R3D_D3D_PRJ.tif	34	230721_DMI4_16_R3D_D3D_PRJ.tif34	CpC_OE	6367	374	0.0587404
230727_DMI8_01_R3D_D3D_PRJ.tif	34	230727_DMI8_01_R3D_D3D_PRJ.tif34	CpC_OE	9963	617	0.0619291
230727_DMI8_03_R3D_D3D_PRJ.tif	34	230727_DMI8_03_R3D_D3D_PRJ.tif34	CpC_OE	10710	669	0.062465
230721_DMI4_22_R3D_D3D_PRJ.tif	34	230721_DMI4_22_R3D_D3D_PRJ.tif34	CpC_OE	9244	583	0.0630679
230721_DMI3_16_R3D_D3D_PRJ.tif	34	230721_DMI3_16_R3D_D3D_PRJ.tif34	CpC_OE	5573	360	0.0645972
230721_DMI4_7_R3D_D3D_PRJ.tif	34	230721_DMI4_7_R3D_D3D_PRJ.tif34	CpC_OE	12353	802	0.0649235
230721_DMI4_6_R3D_D3D_PRJ.tif	34	230721_DMI4_6_R3D_D3D_PRJ.tif34	CpC_OE	6245	426	0.0682146
230721_DMI3_9_R3D_D3D_PRJ.tif	34	230721_DMI3_9_R3D_D3D_PRJ.tif34	CpC_OE	15995	1177	0.0735855
230721_DMI3_18_R3D_D3D_PRJ.tif	34	230721_DMI3_18_R3D_D3D_PRJ.tif34	CpC_OE	10478	834	0.0795953
230719_DMI4_4_R3D_D3D_PRJ.tif	34	230719_DMI4_4_R3D_D3D_PRJ.tif34	CpC_OE	7412	615	0.0829736
230721_DMI4_20_R3D_D3D_PRJ.tif	34	230721_DMI4_20_R3D_D3D_PRJ.tif34	CpC_OE	7473	627	0.083902
230727_DMI8_18_R3D_D3D_PRJ.tif	34	230727_DMI8_18_R3D_D3D_PRJ.tif34	CpC_OE	11778	998	0.0847342
230727_DMI8_10_R3D_D3D_PRJ.tif	34	230727_DMI8_10_R3D_D3D_PRJ.tif34	CpC_OE	8166	732	0.08964
230719_DMI4_8_R3D_D3D_PRJ.tif	34	230719_DMI4_8_R3D_D3D_PRJ.tif34	CpC_OE	9336	878	0.0940446
230719_DMI3_5_R3D_D3D_PRJ.tif	34	230719_DMI3_5_R3D_D3D_PRJ.tif34	CpC_OE	17305	1645	0.0950592
230727_DMI8_11_R3D_D3D_PRJ.tif	34	230727_DMI8_11_R3D_D3D_PRJ.tif34	CpC_OE	6170	638	0.103404
230727_DMI8_12_R3D_D3D_PRJ.tif	34	230727_DMI8_12_R3D_D3D_PRJ.tif34	CpC_OE	13303	1436	0.107946
230721_DMI4_19_R3D_D3D_PRJ.tif	34	230721_DMI4_19_R3D_D3D_PRJ.tif34	CpC_OE	24021	2660	0.110736
230721_DMI3_4_R3D_D3D_PRJ.tif	34	230721_DMI3_4_R3D_D3D_PRJ.tif34	CpC_OE	23026	2810	0.122036
230719_DMI3_6_R3D_D3D_PRJ.tif	34	230719_DMI3_6_R3D_D3D_PRJ.tif34	CpC_OE	15254	1867	0.122394
230721_DMI3_13_R3D_D3D_PRJ.tif	34	230721_DMI3_13_R3D_D3D_PRJ.tif34	CpC_OE	7130	901	0.126367
230721_DMI3_21_R3D_D3D_PRJ.tif	34	230721_DMI3_21_R3D_D3D_PRJ.tif34	CpC_OE	10156	1306	0.128594
230719_DMI4_3_R3D_D3D_PRJ.tif	34	230719_DMI4_3_R3D_D3D_PRJ.tif34	CpC_OE	12059	1600	0.132681
230721_DMI3_2_R3D_D3D_PRJ.tif	34	230721_DMI3_2_R3D_D3D_PRJ.tif34	CpC_OE	4695	675	0.14377
230721_DMI3_22_R3D_D3D_PRJ.tif	34	230721_DMI3_22_R3D_D3D_PRJ.tif34	CpC_OE	3165	469	0.148183
230721_DMI3_25_R3D_D3D_PRJ.tif	34	230721_DMI3_25_R3D_D3D_PRJ.tif34	CpC_OE	5256	785	0.149353
230721_DMI4_21_R3D_D3D_PRJ.tif	34	230721_DMI4_21_R3D_D3D_PRJ.tif34	CpC_OE	9843	1489	0.151275
230721_DMI3_10_R3D_D3D_PRJ.tif	34	230721_DMI3_10_R3D_D3D_PRJ.tif34	CpC_OE	6623	1005	0.151744
230721_DMI4_13_R3D_D3D_PRJ.tif	34	230721_DMI4_13_R3D_D3D_PRJ.tif34	CpC_OE	7768	1214	0.156282
230721_DMI3_6_R3D_D3D_PRJ.tif	34	230721_DMI3_6_R3D_D3D_PRJ.tif34	CpC_OE	1860	295	0.158602
230721_DMI4_5_R3D_D3D_PRJ.tif	34	230721_DMI4_5_R3D_D3D_PRJ.tif34	CpC_OE	4835	782	0.161737
230727_DMI8_06_R3D_D3D_PRJ.tif	34	230727_DMI8_06_R3D_D3D_PRJ.tif34	CpC_OE	7180	1219	0.169777
230727_DMI8_08_R3D_D3D_PRJ.tif	34	230727_DMI8_08_R3D_D3D_PRJ.tif34	CpC_OE	7675	1394	0.181629
230721_DMI3_11_R3D_D3D_PRJ.tif	34	230721_DMI3_11_R3D_D3D_PRJ.tif34	CpC_OE	4220	923	0.21872
230727_DMI8_15_R3D_D3D_PRJ.tif	34	230727_DMI8_15_R3D_D3D_PRJ.tif34	CpC_OE	6177	1362	0.220495
230719_DMI4_2_R3D_D3D_PRJ.tif	34	230719_DMI4_2_R3D_D3D_PRJ.tif34	CpC_OE	14788	3699	0.250135
230727_DMI8_13_R3D_D3D_PRJ.tif	34	230727_DMI8_13_R3D_D3D_PRJ.tif34	CpC_OE	6619	1707	0.257894
230719_DMI3_3_R3D_D3D_PRJ.tif	34	230719_DMI3_3_R3D_D3D_PRJ.tif34	CpC_OE	6747	1773	0.262783
230727_DMI8_17_R3D_D3D_PRJ.tif	34	230727_DMI8_17_R3D_D3D_PRJ.tif34	CpC_OE	5792	1553	0.268128
230721_DMI4_11_R3D_D3D_PRJ.tif	34	230721_DMI4_11_R3D_D3D_PRJ.tif34	CpC_OE	8315	2505	0.301263
230721_DMI3_23_R3D_D3D_PRJ.tif	34	230721_DMI3_23_R3D_D3D_PRJ.tif34	CpC_OE	3509	1139	0.324594
230719_DMI3_2_R3D_D3D_PRJ.tif	34	230719_DMI3_2_R3D_D3D_PRJ.tif34	CpC_OE	3476	1154	0.331991
230721_DMI4_15_R3D_D3D_PRJ.tif	34	230721_DMI4_15_R3D_D3D_PRJ.tif34	CpC_OE	9672	3298	0.340984
230721_DMI3_7_R3D_D3D_PRJ.tif	34	230721_DMI3_7_R3D_D3D_PRJ.tif34	CpC_OE	4150	1521	0.366506
230719_DMI3_9_R3D_D3D_PRJ.tif	35	230719_DMI3_9_R3D_D3D_PRJ.tif35	CpC_OE	21534	112	0.00520108
230721_DMI3_25_R3D_D3D_PRJ.tif	35	230721_DMI3_25_R3D_D3D_PRJ.tif35	CpC_OE	13590	342	0.0251656
230719_DMI3_1_R3D_D3D_PRJ.tif	35	230719_DMI3_1_R3D_D3D_PRJ.tif35	CpC_OE	8983	285	0.0317266
230721_DMI3_22_R3D_D3D_PRJ.tif	35	230721_DMI3_22_R3D_D3D_PRJ.tif35	CpC_OE	9429	340	0.036059
230721_DMI4_17_R3D_D3D_PRJ.tif	35	230721_DMI4_17_R3D_D3D_PRJ.tif35	CpC_OE	14121	589	0.0417109
230719_DMI3_8_R3D_D3D_PRJ.tif	35	230719_DMI3_8_R3D_D3D_PRJ.tif35	CpC_OE	17628	966	0.0547992
230727_DMI8_01_R3D_D3D_PRJ.tif	35	230727_DMI8_01_R3D_D3D_PRJ.tif35	CpC_OE	14158	843	0.0595423
230719_DMI3_6_R3D_D3D_PRJ.tif	35	230719_DMI3_6_R3D_D3D_PRJ.tif35	CpC_OE	25854	1627	0.0629303
230719_DMI3_4_R3D_D3D_PRJ.tif	35	230719_DMI3_4_R3D_D3D_PRJ.tif35	CpC_OE	7412	469	0.0632758
230719_DMI3_3_R3D_D3D_PRJ.tif	35	230719_DMI3_3_R3D_D3D_PRJ.tif35	CpC_OE	7979	508	0.0636671
230721_DMI3_7_R3D_D3D_PRJ.tif	35	230721_DMI3_7_R3D_D3D_PRJ.tif35	CpC_OE	8583	555	0.0646627
230727_DMI8_04_R3D_D3D_PRJ.tif	35	230727_DMI8_04_R3D_D3D_PRJ.tif35	CpC_OE	3827	268	0.0700287
230721_DMI4_13_R3D_D3D_PRJ.tif	35	230721_DMI4_13_R3D_D3D_PRJ.tif35	CpC_OE	7551	542	0.0717786
230721_DMI4_5_R3D_D3D_PRJ.tif	35	230721_DMI4_5_R3D_D3D_PRJ.tif35	CpC_OE	10973	792	0.0721772
230721_DMI3_8_R3D_D3D_PRJ.tif	35	230721_DMI3_8_R3D_D3D_PRJ.tif35	CpC_OE	7404	570	0.0769854
230727_DMI8_11_R3D_D3D_PRJ.tif	35	230727_DMI8_11_R3D_D3D_PRJ.tif35	CpC_OE	15199	1304	0.0857951
230721_DMI4_7_R3D_D3D_PRJ.tif	35	230721_DMI4_7_R3D_D3D_PRJ.tif35	CpC_OE	4904	440	0.0897227
230721_DMI4_20_R3D_D3D_PRJ.tif	35	230721_DMI4_20_R3D_D3D_PRJ.tif35	CpC_OE	8121	737	0.0907524
230721_DMI4_6_R3D_D3D_PRJ.tif	35	230721_DMI4_6_R3D_D3D_PRJ.tif35	CpC_OE	8055	748	0.0928616
230721_DMI4_10_R3D_D3D_PRJ.tif	35	230721_DMI4_10_R3D_D3D_PRJ.tif35	CpC_OE	4285	416	0.0970828
230727_DMI8_18_R3D_D3D_PRJ.tif	35	230727_DMI8_18_R3D_D3D_PRJ.tif35	CpC_OE	12900	1260	0.0976744
230727_DMI8_03_R3D_D3D_PRJ.tif	35	230727_DMI8_03_R3D_D3D_PRJ.tif35	CpC_OE	11252	1137	0.101049
230721_DMI3_21_R3D_D3D_PRJ.tif	35	230721_DMI3_21_R3D_D3D_PRJ.tif35	CpC_OE	6846	695	0.101519
230721_DMI4_19_R3D_D3D_PRJ.tif	35	230721_DMI4_19_R3D_D3D_PRJ.tif35	CpC_OE	13588	1436	0.105681
230721_DMI4_12_R3D_D3D_PRJ.tif	35	230721_DMI4_12_R3D_D3D_PRJ.tif35	CpC_OE	18073	1943	0.107508
230721_DMI3_10_R3D_D3D_PRJ.tif	35	230721_DMI3_10_R3D_D3D_PRJ.tif35	CpC_OE	8855	962	0.108639
230721_DMI3_2_R3D_D3D_PRJ.tif	35	230721_DMI3_2_R3D_D3D_PRJ.tif35	CpC_OE	12525	1422	0.113533
230721_DMI3_17_R3D_D3D_PRJ.tif	35	230721_DMI3_17_R3D_D3D_PRJ.tif35	CpC_OE	12856	1460	0.113566
230721_DMI3_13_R3D_D3D_PRJ.tif	35	230721_DMI3_13_R3D_D3D_PRJ.tif35	CpC_OE	8133	931	0.114472
230727_DMI8_13_R3D_D3D_PRJ.tif	35	230727_DMI8_13_R3D_D3D_PRJ.tif35	CpC_OE	6124	859	0.140268
230719_DMI3_2_R3D_D3D_PRJ.tif	35	230719_DMI3_2_R3D_D3D_PRJ.tif35	CpC_OE	5107	741	0.145095
230719_DMI4_4_R3D_D3D_PRJ.tif	35	230719_DMI4_4_R3D_D3D_PRJ.tif35	CpC_OE	4799	723	0.150656
230719_DMI4_3_R3D_D3D_PRJ.tif	35	230719_DMI4_3_R3D_D3D_PRJ.tif35	CpC_OE	7146	1194	0.167086
230727_DMI8_02_R3D_D3D_PRJ.tif	35	230727_DMI8_02_R3D_D3D_PRJ.tif35	CpC_OE	5502	940	0.170847
230721_DMI4_21_R3D_D3D_PRJ.tif	35	230721_DMI4_21_R3D_D3D_PRJ.tif35	CpC_OE	17549	3004	0.171178
230727_DMI8_10_R3D_D3D_PRJ.tif	35	230727_DMI8_10_R3D_D3D_PRJ.tif35	CpC_OE	10280	1800	0.175097
230721_DMI3_23_R3D_D3D_PRJ.tif	35	230721_DMI3_23_R3D_D3D_PRJ.tif35	CpC_OE	5114	914	0.178725
230721_DMI4_22_R3D_D3D_PRJ.tif	35	230721_DMI4_22_R3D_D3D_PRJ.tif35	CpC_OE	7110	1339	0.188326
230719_DMI4_8_R3D_D3D_PRJ.tif	35	230719_DMI4_8_R3D_D3D_PRJ.tif35	CpC_OE	5709	1114	0.19513
230727_DMI8_08_R3D_D3D_PRJ.tif	35	230727_DMI8_08_R3D_D3D_PRJ.tif35	CpC_OE	4360	883	0.202523
230727_DMI8_15_R3D_D3D_PRJ.tif	35	230727_DMI8_15_R3D_D3D_PRJ.tif35	CpC_OE	2584	546	0.2113
230721_DMI3_16_R3D_D3D_PRJ.tif	35	230721_DMI3_16_R3D_D3D_PRJ.tif35	CpC_OE	4794	1056	0.220275
230721_DMI3_11_R3D_D3D_PRJ.tif	35	230721_DMI3_11_R3D_D3D_PRJ.tif35	CpC_OE	3505	786	0.224251
230721_DMI3_18_R3D_D3D_PRJ.tif	35	230721_DMI3_18_R3D_D3D_PRJ.tif35	CpC_OE	2080	483	0.232212
230727_DMI8_06_R3D_D3D_PRJ.tif	35	230727_DMI8_06_R3D_D3D_PRJ.tif35	CpC_OE	4438	1127	0.253943
230721_DMI3_1_R3D_D3D_PRJ.tif	35	230721_DMI3_1_R3D_D3D_PRJ.tif35	CpC_OE	5995	1549	0.258382
230721_DMI3_9_R3D_D3D_PRJ.tif	35	230721_DMI3_9_R3D_D3D_PRJ.tif35	CpC_OE	5108	1369	0.268011
230721_DMI4_16_R3D_D3D_PRJ.tif	35	230721_DMI4_16_R3D_D3D_PRJ.tif35	CpC_OE	5893	1696	0.287799
230727_DMI8_12_R3D_D3D_PRJ.tif	35	230727_DMI8_12_R3D_D3D_PRJ.tif35	CpC_OE	11863	3912	0.329765
230721_DMI4_4_R3D_D3D_PRJ.tif	35	230721_DMI4_4_R3D_D3D_PRJ.tif35	CpC_OE	9078	3108	0.342366
230719_DMI3_5_R3D_D3D_PRJ.tif	35	230719_DMI3_5_R3D_D3D_PRJ.tif35	CpC_OE	6678	2448	0.366577
230719_DMI3_9_R3D_D3D_PRJ.tif	36	230719_DMI3_9_R3D_D3D_PRJ.tif36	CpC_OE	7409	161	0.0217303
230721_DMI3_18_R3D_D3D_PRJ.tif	36	230721_DMI3_18_R3D_D3D_PRJ.tif36	CpC_OE	16934	388	0.0229125
230721_DMI4_20_R3D_D3D_PRJ.tif	36	230721_DMI4_20_R3D_D3D_PRJ.tif36	CpC_OE	16067	458	0.0285056
230721_DMI3_10_R3D_D3D_PRJ.tif	36	230721_DMI3_10_R3D_D3D_PRJ.tif36	CpC_OE	12109	389	0.0321249
230721_DMI3_8_R3D_D3D_PRJ.tif	36	230721_DMI3_8_R3D_D3D_PRJ.tif36	CpC_OE	11586	405	0.034956
230719_DMI4_3_R3D_D3D_PRJ.tif	36	230719_DMI4_3_R3D_D3D_PRJ.tif36	CpC_OE	24851	877	0.0352903
230719_DMI3_4_R3D_D3D_PRJ.tif	36	230719_DMI3_4_R3D_D3D_PRJ.tif36	CpC_OE	16578	586	0.0353481
230721_DMI4_17_R3D_D3D_PRJ.tif	36	230721_DMI4_17_R3D_D3D_PRJ.tif36	CpC_OE	13054	487	0.0373066
230727_DMI8_18_R3D_D3D_PRJ.tif	36	230727_DMI8_18_R3D_D3D_PRJ.tif36	CpC_OE	15983	607	0.0379779
230727_DMI8_08_R3D_D3D_PRJ.tif	36	230727_DMI8_08_R3D_D3D_PRJ.tif36	CpC_OE	15950	624	0.0391223
230721_DMI4_22_R3D_D3D_PRJ.tif	36	230721_DMI4_22_R3D_D3D_PRJ.tif36	CpC_OE	17826	702	0.0393807
230721_DMI4_6_R3D_D3D_PRJ.tif	36	230721_DMI4_6_R3D_D3D_PRJ.tif36	CpC_OE	17651	726	0.0411308
230721_DMI4_13_R3D_D3D_PRJ.tif	36	230721_DMI4_13_R3D_D3D_PRJ.tif36	CpC_OE	13444	616	0.0458197
230727_DMI8_04_R3D_D3D_PRJ.tif	36	230727_DMI8_04_R3D_D3D_PRJ.tif36	CpC_OE	9584	461	0.048101
230727_DMI8_03_R3D_D3D_PRJ.tif	36	230727_DMI8_03_R3D_D3D_PRJ.tif36	CpC_OE	10637	520	0.048886
[truncated: 5,360 more rows]
